# Supplementary material for: Continental basalts track secular cooling of the mantle and the onset of modern plate tectonics
Source: Research Square preprint supplement (doi:10.21203/rs.3.rs-436896/v1), 2021-04-22
Supplement: Supplementary file 1 [file 0548a545eefcd5e7d259445d.xlsx]

## Sheet: Fig 3a
Age (Ma)	A.I.	2 s.e.m.	n
1000	1.1835	0.39436	5
950	1.1164	0.32296	6
900	0.94815	0.29333	9
850	1.1219	0.27386	13
800	1.1441	0.33946	8
750	1.2365	0.29499	10
700	1.7005	0.24792	11
650	1.6987	0.17404	17
600	1.6843	0.18942	21
550	2.0162	0.17934	56
500	2.0341	0.16431	83
450	2.0586	0.18429	79
400	2.0387	0.10827	135
350	1.9089	0.085262	196
300	2.0883	0.099062	251
250	2.1614	0.092695	318
200	2.3124	0.078423	508
150	2.5236	0.081058	609
100	2.7831	0.026384	6957
50	2.7886	0.026596	6882
0	2.8007	0.027296	6649

## Sheet: Fig 3b
Age (Ma)	Na2O (wt%)	2 s.e.m.	n	K2O (wt%)	2 s.e.m.	n
1000	3.08	0.5717	5	0.79	0.38714	5
950	3.105	0.45755	6	0.55833	0.28507	6
900	2.6189	0.57188	9	0.56444	0.30168	9
850	2.8831	0.47532	13	0.55923	0.2225	13
800	2.83	0.58864	8	0.4775	0.18905	8
750	2.873	0.47043	10	0.511	0.15772	10
700	3.3361	0.25639	10	1.1022	0.39085	11
650	3.5071	0.27035	17	1.1667	0.22036	17
600	3.46	0.23113	21	1.1749	0.19382	21
550	3.5507	0.17751	56	1.374	0.1473	56
500	3.6153	0.14131	75	1.2609	0.11995	75
450	3.6012	0.14516	69	1.2867	0.1348	69
400	3.6194	0.098035	121	1.3093	0.081604	121
350	3.4333	0.079952	174	1.2239	0.072995	176
300	3.5152	0.076928	223	1.3223	0.075175	225
250	3.5109	0.066764	284	1.3741	0.070367	286
200	3.4821	0.04955	453	1.6166	0.063335	453
150	3.5384	0.046672	541	1.689	0.056142	543
100	3.6078	0.011817	6202	1.6771	0.01203	6199
50	3.6119	0.011849	6124	1.68	0.012013	6119
0	3.6156	0.012059	5919	1.672	0.012065	5915

## Sheet: Fig 3c
Age (Ma)	La/Sm	2 s.e.m.	n
1000	3.3479	0.46936	9
950	3.0697	0.53698	12
900	3.2865	0.65506	13
850	3.2865	0.65506	13
800	3.0806	0.55904	13
750	3.0672	0.71836	13
700	3.2658	0.58312	16
650	3.8215	0.49696	15
600	3.5105	0.29889	37
550	3.5852	0.19709	56
500	3.5966	0.19697	53
450	3.6361	0.18486	55
400	3.6177	0.14469	106
350	3.7776	0.10075	164
300	4.0358	0.13867	206
250	4.3216	0.12812	257
200	4.8368	0.10178	413
150	4.9352	0.093148	492
100	5.1434	0.030106	4687
50	5.1426	0.03044	4630
0	5.1423	0.031163	4425

## Sheet: Fig 3d
Age (Ma)	Th (ppm)	2 s.e.m.	n
1000	1.5844	0.55641	9
950	1.4142	0.52674	12
900	1.81	0.61098	12
850	1.81	0.61098	12
800	1.6164	0.5851	14
750	1.6952	0.69478	13
700	2.5846	0.97102	17
650	3.093	0.84655	16
600	2.5769	0.46623	36
550	2.4366	0.33034	57
500	2.5031	0.35894	53
450	2.3505	0.28083	57
400	2.3134	0.18802	106
350	2.8909	0.21582	166
300	3.0643	0.23608	205
250	3.2732	0.21543	254
200	4.219	0.22003	420
150	4.5186	0.22573	509
100	5.1926	0.066908	4994
50	5.2048	0.067397	4932
0	5.2123	0.068764	4746

## Sheet: Fig 5a
Age (Ma)	Tp (°C)	2 s.e.m.	n
1000	1450.6	23.988	1382
960	1454.1	21.896	1592
920	1459.7	21.966	1588
880	1459.9	20.752	1560
840	1454.1	18.806	1661
800	1451.8	20.473	1599
760	1446.2	24.828	1579
720	1429.6	32.845	1644
680	1418.8	17.808	1538
640	1418.4	11.727	1646
600	1415.9	18.55	1605
560	1403.3	20.743	1614
520	1398	11.392	1578
480	1397	10.667	1566
440	1396.6	10.421	1557
400	1398.1	9.22	1684
360	1402.3	10.123	1579
320	1398.5	12.503	1570
280	1392.5	9.322	1613
240	1387.6	10.361	1614
200	1379.7	13.049	1608
160	1369.2	15.457	1591
120	1357.7	16.797	1627
80	1351.4	5.3762	1601
40	1350.6	1.7405	1564
0	1350.1	1.7623	1359

## Sheet: Fig 5b
Data are from Condie et al. (2016)
Location	Age (Ma)	Tg(°C)	P(GPa)	SiO2	TiO2	Al2O3	Mg #	FeOT	MnO	MgO	CaO	Na2O	K2O
Miaowan ophiolite, N China	985	1478.09	1.75632	50.67	1.01	13.06	56.8037	11.0171	0.23	8.13	10.28	2.8	0.32
Miaowan ophiolite, N China	985	1558.57	2.60283	48.39	1.14	13.08	54.4763	12.4641	0.22	8.37	11.48	2.26	0.16
Miaowan ophiolite, N China	985	1562.07	2.59012	49.16	1.14	12.28	54.8094	12.7091	0.22	8.65	10.15	2.49	0.42
Miaowan ophiolite, N China	985	1388.65	1.11776	49.02	0.8	15.27	65.0833	8.8241	0.17	9.23	12.97	1.56	0.16
Miaowan ophiolite, N China	985	1438.77	1.7962	45.9	0.75	13.22	74.0046	9.12016	0.16	14.57	12.03	1.86	0.22
Miaowan ophiolite, N China	985	1564.19	2.79858	43.51	0.66	12.44	74.2849	10.3202	0.19	16.73	10.51	1.57	0.17
Zambian eclogite/gabbro	600	1438.94	1.55634	48.71	1	14.16	60.9744	9.81998	0.16	8.61	12.55	2.31	0.09
Zambian eclogite/gabbro	600	1403.25	1.48446	49.81	0.93	15.22	62.9175	9.25293	0.11	8.81	12.78	3.05	0.15
Tcherni Vrah oph, Bulgaria	563	1417.78	1.34055	49.2	1.51	14.43	60.7953	9.46895	0.16	8.24	10.87	2.36	0.05
Tcherni Vrah oph, Bulgaria	563	1313.13	0.868954	50.13	0.86	16.77	66.7926	7.33573	0.13	8.28	12.56	2.57	0.17
Tcherni Vrah oph, Bulgaria	563	1342.11	1.28472	48.74	0.9	19.82	65.2275	7.88479	0.12	8.3	13.03	2.59	0.18
Tcherni Vrah oph, Bulgaria	563	1458.83	1.80584	50.76	1.64	15.49	59.0739	10.8641	0.17	8.8	6.92	3.97	0.06
Tcherni Vrah oph, Bulgaria	563	1442.37	1.87949	49.35	1.44	16.5	61.4741	10.252	0.14	9.18	9.34	3.54	0.1
Tcherni Vrah oph, Bulgaria	563	1355.95	1.03079	50.28	1.08	16.16	66.3442	8.34383	0.15	9.23	12.34	2.24	0.07
Tcherni Vrah oph, Bulgaria	563	1513.82	2.53958	47.74	1.66	17.08	58.4389	11.7102	0.17	9.24	7.71	3.21	0.3
Tcherni Vrah oph, Bulgaria	563	1433.44	1.60513	50.33	1.61	13.49	63.129	10.054	0.21	9.66	9.22	3.59	0.06
Tcherni Vrah oph, Bulgaria	563	1406.57	0.529393	56.63	1.39	14.46	62.4275	10.414	0.14	9.71	1.22	2.44	0.31
Tcherni Vrah oph, Bulgaria	563	1459.12	2.18513	49.27	1.25	19.12	62.8636	10.9271	0.19	10.38	3.12	5.17	0.29
North Qilian grst, China	517	1387.25	1.33439	51.32	1.39	14.46	60.9187	9.09991	0.16	7.96	10.41	3.84	0.2
North Qilian grst, China	517	1307.14	0.811186	55.95	0.44	15.11	64.644	7.88479	0.14	8.09	5.55	5.91	0.04
North Qilian grst, China	517	1403.21	1.37069	50.67	1.79	14.4	61.0059	9.39694	0.12	8.25	10.87	3.12	0.2
North Qilian grst, China	517	1366.1	1.15637	50.69	0.93	15.23	63.7323	8.56886	0.14	8.45	11.72	2.84	0.42
North Qilian grst, China	517	1265.86	0.456782	54.43	0.31	16.93	68.9449	6.82268	0.14	8.5	9.03	2.64	0.43
North Qilian grst, China	517	1485.88	1.94101	49.9	1.56	14.4	57.9211	11.2241	0.19	8.67	9.69	2.88	0.1
North Qilian grst, China	517	1329.19	0.601822	55.57	0.7	15.54	65.056	8.45185	0.12	8.83	6.39	2.71	0.67
North Qilian grst, China	517	1351.32	0.87607	52.65	1.05	13.12	65.6872	8.44284	0.13	9.07	11.29	2.93	0.3
North Qilian grst, China	517	1277.91	0.705792	55.17	0.46	14.71	71.7069	7.16472	0.14	10.19	5.85	5.34	0.16
North Qilian grst, China	517	1318.73	0.588097	52.7	0.26	11.24	71.9886	7.57876	0.18	10.93	13.31	2.8	0.13
North Qilian grst, China	517	1302.42	0.584755	55.18	0.5	16.54	71.6319	7.87579	0.12	11.16	3.6	3.93	0.17
North Qilian grst, China	517	1328.59	0.633575	53.47	0.32	12.04	76.5734	8.0468	0.17	14.76	7.26	2.51	0.52
North Qilian grst, China	517	1360.28	0.877635	52.36	0.36	12.51	77.7126	8.0288	0.14	15.71	6.15	3.77	0.05
North Qilian grst, China	517	1363.04	0.170169	54.74	0.35	11.19	78.7159	8.25383	0.16	17.13	6.41	0.19	0.65
North Qilian grst, China	517	1405.3	0.336895	52.15	0.24	10.55	78.7364	8.67687	0.17	18.03	9.19	0.01	0.01
North Qilian grst, China	517	1437.97	1.03657	49.03	0.27	11.09	79.2484	8.86589	0.17	19	9.38	0.63	0.55
North Qilian grst, China	517	1417.65	0.740639	50.26	0.28	10.8	80.0529	8.63186	0.16	19.44	8.54	0.9	0.01
Betts Cove	489	1235.97	0.422443	56	0.15	15.6	69.1535	6.2	0.12	7.8	6.45	4.48	0.56
Betts Cove	489	1209.73	0.358459	56.3	0.13	13.9	72.1124	5.52	0.1	8.01	5.85	5.8	0.07
Betts Cove	489	1291.33	0.520656	55.8	0.13	15.1	67.0534	7.53	0.12	8.6	3.94	4.93	0.05
Betts Cove	489	1337.03	0.662429	54.6	0.11	14.1	65.6021	8.4	0.13	8.99	7.69	3.44	0.07
Betts Cove	489	1309.34	0.839175	51.7	0.14	14.3	69.0737	7.42	0.08	9.3	7.93	4.44	0.04
Betts Cove	489	1235.51	0.525699	55.4	0.15	15.4	72.8275	6.19	0.11	9.31	4.31	5.74	0.25
Betts Cove	489	1268.31	-0.130457	59.2	0.08	10.1	70.733	7.13	0.11	9.67	10.2	1.85	0.02
Betts Cove	489	1274.18	0.519763	54.3	0.39	14	71.537	6.92	0.06	9.76	6.18	4.3	0.17
Betts Cove	489	1287.24	0.725392	54.3	0.25	14.1	71.4863	7.25	0.12	10.2	4.38	5.7	0.13
Betts Cove	489	1312.89	0.840862	52.7	0.23	13.2	70.3791	7.65	0.14	10.2	6.54	4.98	0.07
Betts Cove	489	1310.54	-0.0164271	55.1	0.09	10.4	70.8991	7.68	0.16	10.5	11.5	0.54	0.27
Betts Cove	489	1354.57	1.17654	50.1	0.48	13.5	70.7282	8.26	0.13	11.2	6.84	4.56	0.04
Betts Cove	489	1281.97	0.518531	53.9	0.21	12.5	74.5412	7.06	0.14	11.6	5.62	4.37	0.07
Betts Cove	489	1292.65	0.210357	55	0.12	11.9	74.8366	7.37	0.12	12.3	6.14	2.43	0.15
Betts Cove	489	1271.29	0.442363	52.6	0.1	12.7	78.4406	6.71	0.11	13.7	6.21	3.37	0.07
Betts Cove	489	1440.18	1.28438	50.73	0.15	11.91	71.4409	10.08		14.15	10.91	1.89	0.03
Betts Cove	489	1287.54	0.54267	52.4	0.1	12.8	78.3535	7.04	0.13	14.3	4.52	3.79	0.1
Betts Cove	489	1419.83	1.17091	48.6	0.11	12.8	77.6664	8.66	0.15	16.9	5.06	2.72	0.13
Karmoy ophiolite 1	480	1345.8	1.03603	50.9	0.44	16.07	66.1737	8.19819	0.2	9	10.1	3.17	0.16
Karmoy ophiolite 1	480	1366.34	1.11688	49.72	0.51	13.74	71.4675	8.4661	0.21	11.9	8.57	3.12	0.13
Karmoy ophiolite 1	480	1390.24	1.20273	47.99	0.57	13.27	72.564	8.57023	0.22	12.72	11.56	1.94	0.13
Karmoy ophiolite 2	480	1346.34	1.03255	54.61	1.16	14.02	62.4214	8.62521	0.18	8.04	6.72	5.41	0.16
Annieopsquotch ophiolite, Nfl	475	1411.72	1.59703	47.46	0.8	18.49	60.41	9.22592	0.2	7.9	10.88	2.42	0.04
Annieopsquotch ophiolite, Nfl	475	1550.62	2.69753	48.9	1.34	14.77	53.1605	12.5923	0.27	8.02	6.64	4.13	0.04
Buqingshan, Tibet	470	1431.34	1.53319	48.7	1.56	15.03	58.8063	9.72413	0.23	7.79	10.1	2.61	0.15
Buqingshan, Tibet	470	1337.35	0.694905	51.59	0.89	15.38	64.1938	8.03124	0.17	8.08	10.51	2.06	0.04
Buqingshan, Tibet	470	1374.87	1.08398	49.29	0.98	14.49	64.1314	8.53145	0.18	8.56	11.38	2.15	0.4
Buqingshan, Tibet	470	1331.72	1.01898	47.07	0.68	15.78	72.5745	7.34013	0.16	10.9	11.1	2.25	0.07
Betts Cove ophiolite, Nfl	460	1318.79	0.855287	51.76	0.42	16.1	64.5898	7.65926	0.15	7.84	7.57	3.95	0.15
Betts Cove ophiolite, Nfl	460	1252.04	0.529545	53.37	0.51	16.26	68.9888	6.3361	0.16	7.91	8.11	3.92	0.15
Betts Cove ophiolite, Nfl	460	1289.62	0.656048	53.57	0.35	14.35	66.7457	7.13816	0.14	8.04	9.07	4.27	0.03
Betts Cove ophiolite, Nfl	460	1268.96	0.720041	52.93	0.5	15.47	70.6738	6.71412	0.16	9.08	6.8	4.94	0.08
Betts Cove ophiolite, Nfl	460	1383.54	1.25815	47.14	0.53	15.69	69.0735	8.47325	0.17	10.62	12.05	1.88	0.05
Betts Cove ophiolite, Nfl	460	1313.36	0.414167	53.29	0.11	11.38	73.5383	7.57926	0.17	11.82	8.74	2.52	0.12
Betts Cove ophiolite, Nfl	460	1327.11	0.266679	50.99	0.17	11.29	75.2298	7.5631	0.14	12.89	11.86	0.72	0.08
Betts Cove ophiolite, Nfl	460	1470.7	1.70591	47.41	0.11	14.49	69.6548	10.4183	0.17	13.42	7.67	0.29	1.69
Betts Cove ophiolite, Nfl	460	1405.45	0.901901	46.66	0.19	12.66	74.9924	8.53328	0.16	14.36	13.17	0.17	0.04
Isle de Groix, France	460	1428.43	1.61767	47.3276	1.1833	15.22	73.2368	9.38069	0.1555	14.4052	10.4622	1.5189	0.1223
Ingalls ophiolite, Washington	161	1192.51	0.0899286	56.45	0.38	13.8	74.4634	5.13951	0.15	8.41	11.68	2.79	0.58
Ingalls ophiolite, Washington	161	1319.49	0.736892	48.1947	0.797791	15.9967	68.959	7.16242	0.143193	8.92912	16.4468	1.18646	0.286386
Hokkaido, Japan ophiolite	150	1503.89	2.33012	49.38	1.1	13.11	55.5099	11.4401	0.19	8.01	8.23	3.94	0.9
Hokkaido, Japan ophiolite	150	1461.67	1.90982	47.04	1.09	14.12	60.7038	10.036	0.17	8.7	11.29	2.66	0.25
Hokkaido, Japan ophiolite	150	1484.96	2.09934	47.29	1.14	13.92	59.8171	10.6301	0.23	8.88	10.61	2.71	0.31
Hokkaido, Japan ophiolite	150	1302.22	0.546583	54.22	0.69	9.1	75.0591	7.38974	0.12	12.48	8.79	4.14	0.09
Hokkaido, Japan ophiolite	150	1340.4	0.726694	52.59	0.66	9.33	75.0535	8.0198	0.12	13.54	8.39	3.64	0.08
Hokkaido, Japan ophiolite	150	1503.39	0.945852	48.11	0.6	6.41	76.2339	9.62196	0.22	17.32	12.89	0.29	0.07
Yarlung Zangbo ophiolite	150	1349.83	1.17132	51.1	0.86	16.1	62.666	8.28083	0.14	7.8	7.5	4.69	0.02
Yarlung Zangbo ophiolite	150	1359.63	1.2507	51.1	0.78	16.9	63.6752	8.64086	0.17	8.5	6.3	4.26	0.57
Yarlung Zangbo ophiolite	150	1367.91	1.34801	50	0.48	17	64.732	8.64086	0.16	8.9	8	4.2	0.06
Yarlung Zangbo ophiolite	150	1394.7	2.03504	48.2	1.7	14.7	65.2631	8.82088	0.17	9.3	9.2	5.42	0.75
Yarlung Zangbo ophiolite	150	1221.66	0.560287	51.7	0.49	16.3	75.3137	5.49055	0.12	9.4	11.1	2.42	1.57
Yarlung Zangbo ophiolite	150	1397.55	1.19454	50.2	0.94	13	65.9977	9.18092	0.17	10	8.7	3.04	0.22
Yarlung Zangbo ophiolite	150	1347.21	1.01802	50.6	0.72	13.9	70.1461	8.19082	0.17	10.8	9.2	2.66	0.88
Yungbwa ophiolite, SW Tibet	150	1494.34	2.11465	48.91	1.54	12.51	56.874	11.0261	0.23	8.16	11.78	3.14	0.16
Yungbwa ophiolite, SW Tibet	150	1502.62	2.23534	48.8	1.43	13.64	56.4887	11.2691	0.24	8.21	12.27	2.84	0.19
Yungbwa ophiolite, SW Tibet	150	1420.06	1.51408	47.68	1.06	14.77	63.102	9.25293	0.2	8.88	13.23	2.23	0.05
Muslin Bagh, Pakistan	145	1435.64	1.6078	48.9979	0.919757	14.04	60.4691	9.8069	0.170083	8.41824	10.7318	2.92235	0.301792
Muslin Bagh, Pakistan	145	1373.87	1.15333	49.2684	0.836193	13.7414	67.6086	8.50121	0.14829	9.95742	10.8582	2.86692	0.123123
Muslin Bagh, Pakistan	145	1297.25	0.543964	45.8941	0.240234	16.6052	75.3695	6.29898	0.137644	10.8165	18.5939	0.661149	0.0528792
East Sulawesi ophiolite	110	1364.47	1.23006	50.29	0.84	16.52	62.5628	8.52	0.13	7.99	10.07	3.2	0.44
East Sulawesi ophiolite	110	1428.68	1.54751	49.23	1.29	16.26	61.0054	9.83	0.17	8.63	12.03	2.22	0.01
Italian Albian ophiolites	105	1457.89	1.98913	48.136	0.874615	16.3713	58.3808	10.2606	0.168856	8.07685	11.2517	2.92483	0.285122
Italian Albian ophiolites	105	1459.85	1.82419	48.72	0.96	15.89	59.638	10.4321	0.18	8.65	10.97	2.5	0.11
Italian Albian ophiolites	105	1459.34	1.8082	49.28	1.31	14.76	60.284	10.4721	0.16	8.92	11.24	2.8	0.02
Northland, New Zealand	100	1459.99	1.76031	47.28	1.37	11.8	66.2988	9.94599	0.22	10.98	12.01	2.24	0.21
Sarikaraman, Turkey	100	1418.76	1.5626	49.26	1.35	15.9	59.1013	9.63096	0.17	7.81	7.16	3.46	0.59
Sarikaraman, Turkey	100	1448.16	1.98263	46.23	0.95	17.03	59.3505	9.70297	0.37	7.95	12.96	1.87	0.64
Sarikaraman, Turkey	100	1321.72	0.870959	48.38	0.61	17.95	66.7127	7.31773	0.12	8.23	14.09	1.67	0.07
Sarikaraman, Turkey	100	1320.79	0.845792	49.82	0.37	16.43	66.6276	7.47075	0.18	8.37	11.86	2.35	0.25
Sarikaraman, Turkey	100	1232.03	0.299407	47.58	0.22	19.01	74.2661	5.21152	0.12	8.44	17.43	0.77	0.08
Sarikaraman, Turkey	100	1468.5	1.80812	47.86	0.88	15.3	59.1156	10.414	0.23	8.45	12.24	1.66	0.34
Sarikaraman, Turkey	100	1357.71	1.00522	48.65	0.64	16.54	65.7323	8.10081	0.22	8.72	13.9	1.54	0.16
Sarikaraman, Turkey	100	1345.69	0.906223	48.19	0.57	16.58	67.7519	7.79478	0.22	9.19	14.35	1.22	0.18
Sarikaraman, Turkey	100	1324.08	0.710201	51.4	0.61	14.22	68.2909	7.68677	0.18	9.29	11.87	2.42	0.13
Sarikaraman, Turkey	100	1275.93	0.521676	48.77	0.33	16.87	73.6163	6.35464	0.19	9.95	14.22	1.18	0.22
Sarikaraman, Turkey	100	1358.59	0.970202	48.68	0.58	15.31	68.8899	8.12781	0.24	10.1	13.47	1.44	0.27
Sarikaraman, Turkey	100	1285.17	0.288899	50.57	0.38	11.64	76.2608	6.60666	0.16	11.91	14.62	1.56	0.14
Troodos Complex, Cyprus	90	1324.31	0.627184	53.97	0.69	16.13	64.2145	8.09352	0.13	8.15	9.65	2.01	0.53
Oman ophiolite 3	78	1362.46	0.782595	50.55	0.74	15.36	63.6296	8.43384	0.16	8.28	12.16	1.39	0.04
Oman ophiolite 3	78	1377.04	0.933208	49.93	0.8	15.5	62.9495	8.69487	0.12	8.29	12.24	1.49	0.08
Oman ophiolite 3	78	1421.52	1.23508	48.81	0.74	14.79	61.3205	9.44194	0.14	8.4	13.48	1.36	0.04
Oman ophiolite 3	78	1266.41	0.423111	50.84	0.59	16.21	70.7687	6.38164	0.12	8.67	12.55	1.76	0.11
Oman ophiolite 3	78	1388.05	0.967121	48.97	0.54	15.83	64.1848	8.82988	0.14	8.88	12.55	1.02	0.03
Oman ophiolite 3	78	1168.23	-0.119406	49.92	0.22	17.08	80.4651	4.0234	0.09	9.3	17.1	0.83	0.01
Oman ophiolite 3	78	1197.54	0.346118	46.22	0.11	20.95	79.5085	4.48245	0.07	9.76	14.6	0.78	0.02
Oman ophiolite 3	78	1174.56	0.035289	47.06	0.16	18.72	82.2421	4.0324	0.08	10.48	15.95	0.46	0.01
Oman ophiolite 3	78	1260.22	0.248199	48.07	0.31	16.6	76.5682	5.94959	0.1	10.91	15.18	0.33	0.01
Chile ridge glasses	0	1374.48	1.13424	50.53	1.3	15.44	61.978	8.71287	0.12	7.97	11.57	2.85	0.02
Chile ridge glasses	0	1351.59	1.0117	50.58	1.18	15.95	63.8726	8.24482	0.12	8.18	11.65	2.78	0.02
Chile ridge glasses	0	1416.02	1.36671	50.09	1.43	14.88	60.573	9.60396	0.12	8.28	11.04	2.69	0.02
Chile ridge glasses	0	1380.23	1.16934	50.46	1.22	15.17	63.3131	8.83888	0.12	8.56	12.4	2.69	0.02
Chile ridge glasses	0	1402.87	1.32669	50.02	1.35	15.1	62.298	9.30693	0.12	8.63	11.34	2.76	0.02
Chile ridge glasses	0	1250.07	0.44627	50.06	1.12	15.71	72.3727	5.90459	0.12	8.68	11.83	2.36	0.02
DSDP	0	1339.04	0.9292	49.7	0.72	16.4	69.4959	7.9	0.12	10.1	13.1	1.98	0.01
DSDP	0	1340.2	0.934222	49.61	0.71	16.24	70.2402	7.92	0.12	10.49	12.87	1.96	0.01
DSDP	0	1318.2	0.512243	50.93	1.01	17.27	71.9309	7.67	0.2	11.03	11.36	0.36
DSDP	0	1348.96	0.984424	49.18	0.68	15.44	73.4592	7.99	0.11	12.41	12.24	1.86	0.01
DSDP	0	1452.69	1.57147	47.88	0.56	14.23	74.2009	9.3	0.14	15.01	10.69	1.85	0.14
DSDP	0	1446.23	1.34859	48.44	0.83	14.04	74.6391	9.27	0.14	15.31	10.24	1.42	0.02
DSDP	0	1387.4	1.05752	48.35	0.61	13.82	78.5921	7.98	0.1	16.44	10.96	1.67	0.01
FAMOUS	0	1381.76	1.2181	48.6	0.61	16.3	67.6547	8.69	0.15	10.2	12.3	1.9	0.07
FAMOUS	0	1381.76	1.2181	48.6	0.61	16.3	67.6547	8.69	0.15	10.2	12.3	1.9	0.07
FAMOUS	0	1381.54	1.21776	49.1	0.62	16.5	67.6427	8.78	0.15	10.3	12.4	1.92	0.07
FAMOUS	0	1381.09	1.20913	49.1	0.62	16.5	67.6427	8.78	0.15	10.3	12.2	1.92	0.07
FAMOUS	0	1404.98	1.36552	49.4	0.68	15.8	66.8899	9.35	0	10.6	11.9	2.02	0.23
FAMOUS	0	1354.03	0.936088	50.48	0.87	15.33	69.559	8.36	0.15	10.72	11.84	1.88	0.17
FAMOUS	0	1382.7	1.19934	48.4	0.81	15.3	69.7397	8.66	0.15	11.2	11.8	1.84	0.11
FAMOUS	0	1338.88	0.955126	48.7	0.69	16.1	72.1359	7.73	0.19	11.23	12.41	1.8	0.07
FAMOUS	0	1353.57	1.07304	48.5	0.75	16.2	71.2807	8.07	0.16	11.24	12.42	1.85	0.07
FAMOUS	0	1349.74	0.981878	48.78	0.63	15.77	73.3905	7.96	0.15	12.32	12.61	1.55	0.09
LEG 37	0	1418.56	1.59415	46.49	0.73	15.14	64.5931	9.055	0.15	9.27	12.15	2.3	0.18
LEG 37	0	1412.66	1.50932	47.2	0.73	15.03	67.3781	9.085	0.11	10.53	11.39	2.26	0.14
LEG 37	0	1409.07	1.46368	46.33	0.59	15.32	68.4443	8.873	0.12	10.8	11.35	1.9	0.13
LEG 37	0	1445.84	1.82688	47.36	0.73	15.09	66.2996	9.846	0.16	10.87	10.71	2.5	0.19
LEG 37	0	1404.85	1.40514	47.57	0.6	15.31	68.4065	9.012	0.13	10.95	11.14	2.07	0.12
LEG 37	0	1433.05	1.64789	46.6	0.58	14.8	67.7028	9.402	0.14	11.06	11.2	2.07	0.14
LEG 37	0	1404.69	1.4068	46.99	0.7	14.7	68.9486	8.876	0.16	11.06	11.16	2.08	0.11
LEG 37	0	1420.08	1.59346	46.66	0.7	14.79	68.7875	9.137	0.15	11.3	11.19	2.19	0.15
LEG 37	0	1379.54	1.31903	47.8	0.6	16.2	70.3791	8.55	0.19	11.4	11.3	2.11	0.14
LEG 37	0	1432.07	1.58235	47.6	0.58	13.8	73.7875	9.369	0.18	14.8	10.7	1.84	0.05
MORB 13 Niu and O'Hara 2009	0	1378.02	1.27599	47.55	0.798	15.96	73.4821	8.36	0.149	13	12.43	1.63	0.0378
MORB glass Atlantic	0	1385.18	1.16718	50.6	1.05	15	63.3479	8.97	0.18	8.7	12.5	2.43	0.11
MORB glass Atlantic	0	1330.22	0.71649	51.36	0.78	15.03	67.1347	7.86	0.1	9.01	12.35	2.04	0.1
MORB glass Atlantic	0	1336.81	0.74925	51.2	0.84	15	66.8241	7.98	0.16	9.02	13.3	1.89	0.08
MORB glass Atlantic	0	1339.23	0.774808	51.4	0.83	15	66.9476	8.05	0.16	9.15	13.2	1.97	0.09
MORB glass Atlantic	0	1332.78	0.877927	50.82	0.92	15.92	67.8783	7.91	0.13	9.38	12.07	2.3	0.16
MORB glass Atlantic	0	1359.98	0.997287	49.93	0.72	15.82	67.5555	8.37	0.15	9.78	12.67	1.96	0.05
MORB glass Atlantic	0	1372.16	1.11077	48.96	0.82	15.75	67.1875	8.52	0.13	9.79	11.92	1.97	0.11
MORB glass Atlantic	0	1365.37	1.06842	50.37	0.84	15.86	67.1259	8.57	0.16	9.82	12.33	2.18	0.09
MORB glass Atlantic	0	1376.05	1.17906	49.65	0.87	16.05	66.7419	8.72	0.15	9.82	11.76	2.25	0.09
MORB glass Atlantic	0	1378.39	1.20217	49.5	0.66	16.51	66.7305	8.76	0.17	9.86	12.68	2.08	0.04
MORB glass Atlantic	0	1370.91	1.11133	50.3	0.84	15.99	66.9949	8.7	0.13	9.91	12.33	2.16	0.09
MORB glass Atlantic	0	1376.15	1.31574	48.2	0.5	16.9	67.5071	8.5	0.15	9.91	12.8	2.3	0.04
MORB glass Atlantic	0	1376.09	1.33688	48.2	0.51	17	67.8967	8.51	0.16	10.1	12.7	2.34	0.04
MORB glass Atlantic	0	1370.23	1.09235	49.98	0.77	15.24	67.6886	8.6	0.13	10.11	12.45	2.23	0.07
MORB glass Atlantic	0	1384.49	1.25968	49.07	0.74	16.44	67.1209	8.86	0.16	10.15	11.65	2.13	0.07
MORB glass Atlantic	0	1388.81	1.28937	48.81	0.73	16.13	67.4122	8.89	0.16	10.32	11.56	2.15	0.07
MORB glass Atlantic	0	1379.2	1.27312	49.19	0.85	16.12	67.9743	8.74	0.14	10.41	11.91	2.35	0.09
MORB glass Atlantic	0	1381.96	1.31988	48.93	0.84	16.14	68.1159	8.75	0.15	10.49	11.84	2.41	0.09
MORB glass Atlantic	0	1357.99	1.04848	49.57	0.85	15.26	69.5841	8.28	0.14	10.63	12.11	2.11	0.19
MORB glass Atlantic	0	1351.95	0.973953	49.47	0.82	15.23	69.9772	8.15	0.14	10.66	12.21	1.94	0.16
NMORB Atlantic	0	1415.38	1.38313	50.35	1.39	15.38	59.5272	9.62	0.17	7.94	11.4007	2.58624	0.063
NMORB Indian	0	1395.77	1.31348	50.49	1.31	15.79	60.8447	9.22	0.15	8.04	11.64	2.79	0.064
NMORB Pacific	0	1410.25	1.40024	50.18	1.38	15.55	60.1594	9.5	0.17	8.05	11.91	2.6	0.11
NMORB Presnall/Hoover 87	0	1346.13	1.0381	49.51	0.9	16.75	68.3153	8.05	0.14	9.74	12.5	2.18	0.065
ODP296A	0	1400.06	1.24446	49.03	0.64	16.07	64.8205	9.12	0.12	9.43	13.66	1.62	0.02
ODP296A	0	1458.05	1.46192	47.76	0.54	13.57	74.9029	9.30843	0.1	15.59	11.54	1.37	0.02
ODP296A	0	1467.24	1.53048	47.49	0.52	13.06	76.1859	9.3634	0.1	16.81	11.1	1.32	0.02
Pacific MORB	0	1343.92	1.09647	49.21	0.97	17.54	67.0957	7.97		9.12	12.35	2.43	0.04
Pacific MORB	0	1344.69	1.10758	49.15	0.96	17.58	68.0641	8.01		9.58	12.14	2.38	0.04
Pacific MORB	0	1346.08	1.06781	49.85	0.86	17.51	68.2608	8.12	0.21	9.8	12.92	2.15	0.02
Pacific MORB	0	1351.23	1.20603	48.47	0.88	17.39	68.5677	8.03	0.16	9.83	12.26	2.47	0.03
Pacific MORB	0	1348.12	1.08451	49.46	0.83	17.42	68.3976	8.11	0.14	9.85	12.72	2.14	0.04
Pacific MORB	0	1395.36	1.48003	47.2	0.77	16.9	68.8206	8.8	0.14	10.9	12.2	2.05	0.02

## Sheet: Fig 5c
Data are from Holder et al. (2019)
Location	Age (Gyr)	T (°C)	P (GPa)	T / P (°C/GPa)	Type	Latitude	Longitude	References
Yuli belt, eastern Taiwan	0.005	540	1.65	327	LHPOB	23.31	121.229	Keyser et al. (2016); Sandmann et al. (2015)
Fergusson Island, eastern Papua New Guinea	0.007	720	2.8	257	LUHPCE	-9.476	150.461	Kohn et al. (2015); Zirakparvar et al. (2011); Baldwin et al. (2008)
Eclogite, Wandamen Peninsula, Western papua	0.0081	770	2	385	LHPOE	-2.48	134.575	François et al. (2016)
West of Namche Barwa, eastern Himalayan syntaxis	0.01	820	1.5	547	I	29.59	94.93	Tian et al. (2016); Booth et al. (2009)
Eclogite, Dinggye, central Himalaya, China	0.014	740	2.2	336	LHPCE	27.99	87.65	Wang et al. (2016)
Seram, eastern Indonesia	0.016	925	0.9	1028	HUHT	-3.002	129.479	Pownall (2015); Pownall et al. (2014)
Yardoi Dome, southern Tibet, China	0.018	660	0.9	733	I	28.833	92.052	Wang et al. (2018)
Hidaka metamorphic belt, Japan	0.019	900	0.75	1200	HUHT	42.333	142.95	Kemp et al. (2007)
Ky metatexite, Lower GHC, Nylam, central Himalaya, China	0.019	650	0.95	684	I	27.96	85.97	Wang et al. (2013, 2015)
Eclogite and granulite xenoliths, Dunkeldik magmatic field, central Pamir Mountains	0.02	1060	2.7	393	I	37.78	74.9	Gordon et al. (2012); Hacker et al. (2005)
Oaro Chu Valley, western Bhutan	0.021	710	0.65	1092	HAG	27.586	89.294	Regis et al. (2016)
Eclogite, Arun Valley, eastern Nepal	0.021	670	1.5	447	I	27.76	87.42	Corrie et al. (2010)
Footwall of the Kef Lakhal thrust, Edough Massif, Algeria	0.021	750	3.6	208	LUHPOE	36.95	7.675	Bruguier et al. (2017); Caby et al. (2014)
Ky migmatite, eastern Arunachal Predesh, India	0.0215	735	1	735	I	28.508	94.47	Clarke et al. (2016)
Paixang, Namche Barwa, eastern Himalaya, China	0.024	850	1.5	567	I	29.4757	94.82	Guilmette et al. (2011); Xu et al. (2010)
Granulite xenoliths,Kilbourne Hole/Potrillo volcanic field, New Mexico, USA	0.025	875	0.845	1036	HAG	31.972	-106.965	Scherer et al. (1997); Hamblock et al. (2007); Bohlen et al. (1983)
Higher Himalayan Crystallines, Sikkim, India	0.027	800	1	800	HAG	27.689	88.586	Anczkiewicz et al. (2014); Sorcar et al. (2014)
Hunza Valley, Karakoram metamorphic complex, Pakistan	0.028	692	0.83	834	HAG	36.298	74.595	Palin et al. (2012)
Sill-Kfs metatexite, Upper GHC, Nylam, central Himalaya, China	0.028	720	0.7	1029	HAG	28.239	86.011	Wang et al. (2013, 2015)
Lower crustal xenoliths, central Mexico	0.03	1020	1.15	887	HUHT	22.835	-101.488	Hayob et al. (1993, 1989); Rudnick and Cameron (1991)
Higher Himalayan crystalline squence, Yadong, Tibet	0.03	835	1.2	696	I	27.45	88.88	Zhang et al. (2015)
Gimigliano, lower ophiolitic unit, Catena Costiera, Calabria, Italy	0.031	370	1.25	296	LHPOB	39	16.5	Rossetti et al. (2004)
Ky paragneiss, Kali Gandaki valley, central Nepal	0.032	720	1.1	655	I	28.56	83.635	Iaccarino et al. (2015)
Eclogite zone, Tauern Window, Eastern Alps, Austria	0.032	560	2.55	220	LHPOELp	47.072	12.45	Nagel et al. (2013); Hoschek (2013, 2004); Smye et al. (2011, 2010)
Day Nui Con Voi metamorphic core complex, northern Vietnam	0.034	805	0.85	947	HAG	21.73	104.816	Palin et al. (2013)
Gran Paradiso Massif, Western Alps	0.034	520	2	260	LHPCE	45.545	7.35	Manzotti et al. (2015); Gabudianu Radulescu et al. (2009);
Schistes Lustrés, Corsica, France	0.034	520	2.3	226	LHPOEL	42.417	9.38	Brovarone and Herwartz (2013); Brovarone et al. (2011); Martin et al. (2011)
Diamante, lower ophiolitic unit, Catena Costiera, Calabria, Italy	0.034	370	1	370	LHPOEL	39.671	15.827	Fedele et al. (2018); Rossetti et al. (2004)
Brossasco-Isasca unit (Dora-Maira Massif), Western Alps	0.035	730	4	183	LUHPCE	44.584	7.36	Castelli et al. (2007); Groppo et al. (2007); Hermann (2003); Rubatto and Hermann (2001); Gebauer et al. (1997)
Jomolhari massif, western Bhutan	0.036	785	0.9	872	HAG	27.7978	89.35	Regis et al (2014)
Shakhdara dome, southern Pamir Mountains	0.037	830	1	830	HAG	37.333	72	Smit et al. (2015); Schmidt et al. (2011)
Trescolmen, Adula nappe, Western Alps	0.037	750	2.5	300	LHPCE	46.4068	9.185	Herwartz et al. (2011); Dale & Holland (2003)
Cycladic blueschist unit, south Naxos Island, Greece	0.039	595	1.6	372	LHPOE	36.99	25.52	Peillod et al. (2017)
Lws blueschist, Diahot terrane (Zone 2), northern New Caledonia	0.039	540	1.9	284	LHPOBL	-20.336	164.427	Brovarone and Agard (2013); Pirard and Spandler (2017)
Saas Fee (Zermatt-Saas zone), Western Alps	0.041	542	2.38	228	LHPOE	46.0601	7.9351	Skora et al. (2015); Angiboust et al. (2009)
Gressoney valley, Monte Rosa nappe, Western Alps	0.043	560	2.55	220	LHPCEL	45.82	7.825	Gasco et al. (2011); Lapen et al. (2007)
Eclogite, Pouébo terrane (Zone 4), northern New Caledonia	0.044	550	2.5	220	LHPOE	-20.258	164.377	Brovarone and Agard (2013); Spandler et al. (2005)
Lago Di Cignana (Zermatt-Saas zone), Western Alps	0.044	600	3.25	185	LUHPOELp	45.877	7.593	Frezzotti et al. (2014); Groppo et al. (2009); Rubatto et al. (1998)
Triftji (Zermatt-Saas zone), Western Alps	0.044	540	2.3	235	LHPOBL	45.956	7.743	de Meyer et al. (2014); Angiboust et al. (2009); Barnicoat and Fry (1986)
Balma unit (Zermatt-Saas zone), Western Alps	0.044	580	1.9	305	LHPOE	45.855	7.938	Herwartz et al. (2008)
Kurudere, southern Menderes massif, southwestern Turkey	0.045	480	1.3	369	LHPCE	37.448	27.582	Pourteau et al. (2013); Rimmele et al. (2005)
Cycladic blueschist unit, Sifnos Island, Greece	0.045	540	2.4	225	LHPOE	37.025	24.656	Castro and Spear (2017); Dragovic et al. (2015)
Lago Superiore unit, Monviso, Western Alps	0.045	550	2.7	204	LHPOELp	44.6673	7.0904	Angiboust et al. (2012); Rubatto & Hermann (2003)
Yardoi dome, southeastern Tibet	0.047	650	0.75	867	HAG	28.83	92.05	Ding et al. (2016)
Eclogite, Kaghan Valley, NW Himalaya, Pakistan	0.047	710	3.3	215	LUHPCE	35.438	73.982	Wilke et al. (2010a, b)
Blueschist clast, serpentine mud volvano, Mariana forearc	0.048	570	1.45	393	LHPOB	13.79	145.97	Tamblyn et al. (2018); Zack et al. (2013)
Mt Pesucco, Voltri Massif, Ligurian Alps	0.049	480	2.5	192	LHPOELp	44.52	8.85	Malatesta et al. (2012); Federico et al. (2005)
Roboaro River, Voltri Massif, Ligurian Alps	0.049	470	2.3	204	LHPOEL	44.5447	8.43604	Scarsi et al. (2017); Federico et al. (2005)
Kangmar dome, southern Tibet	0.05	624	0.86	726	I	28.556	89.677	Smit et al. (2014); Lee et al. (2000)
Tso-Morari eclogite, western Himalaya, India	0.051	645	2.8	230	LUHPCE	33.234	78.372	St-Onge et al. (2013)
Stak eclogite, Haramosh, NE Himalaya, Pakistan	0.051	750	2.5	300	LHPCE	35.67	75.02	Lanari et al. (2013); Riel et al. (2008)
Cycladic blueschist unit, Syros Island, Greece	0.052	560	2.3	243	LHPOELp	37.4992	24.8937	Laurent et al. (2018); Cliff et al (2017); Lister and Forster (2016); Philippon et al. (2013); Lagos et al. (2007); Tomaschek et al. (2003)
Sample 345, Valtournanche (Etirol-Levaz slice), Western Alps	0.052	550	2.3	239	LHPCE	45.828	7.588	Fassmer et al. (2016)
Mabja dome, southern Tibet	0.053	650	0.88	739	I	28.8333	88.2333	Smit et al. (2014); Lee et al. (2004)
Sample 329 Valtournanche (Etirol-Levaz slice), Western Alps	0.062	550	2.3	239	LHPCE	45.83	7.578	Fassmer et al. (2016)
Priest River core complex, northern Idaho, USA	0.064	785	0.95	826	HAG	48	-117	Stevens et al. (2015)
Crustal xenoliths, Prindle volcano, Alaska	0.065	900	0.74	1216	HUHT	63.715	-141.63	Ghent et al. (2008)
Upper Valtournanche (Zermatt-Saas zone), Western Alps	0.065	620	2.5	248	LHPOE	45.911	7.618	Rebay et al. (2018); Zanoni et al. (2016); Rebay et al. (2012)
Sancti Spiritus dome, Escambray massif, central Cuba	0.069	550	1.85	297	LHPOE	21.93	-79.59	Grevel et al. (2006); Schneider et al. (2004)
Lws blueschist, Seghin, Hajiabad area, Zagros, Iran	0.071	500	1.75	286	LHPOEL	28.492	56.883	Angiboust et al. (2016); Agard et al. (2005)
Fondo unit, Eclogitic Micaschist Complex, Sesia Zone, Western Alps	0.075	530	1.8	294	LHPCE	45.555	7.718	Regis et al. (2014)
As Sifah, Oman	0.079	520	2	260	LHPOELp	23.458	58.78	Warren et al. (2006, 2005): Searle et al. (1994)
Blueschist, Almagro HP-LT complex, Diego de Almagro Island, Patagonia	0.08	540	1.65	327	LHPOB	-51.59	-75.21	Hyppolito et al. (2016)
Iranshahr blueschist, inner Makran accretionary prism	0.081	460	1.3	354	LHPOB	27.037	61.195	Omrani et al. (2017); Delaloye and Desmons (1980)
Lws blueschist NNW of Fannuj, inner Makran accretionary prism	0.081	380	1.15	330	LHPOBL	26.89	59.55	Hunziker et al. (2017); Delaloye and Desmons (1980)
Garnet Ridge, Colorado Plateau, USA	0.081	630	4.07	155	LUHPOEL	37	-109	Wei and Clarke (2011); Usui et al. (2003)
Bitlis massif, southeastern Turkey	0.083	520	2	260	LHPCE	38.3037	42.5637	Oberhänsli et al. (2013)
Tavsanli zone, western Turkey	0.083	500	2.4	208	LHPCEL	39.88	29.08	Plunder et al. (2015); Sherlock et al. (1999)
Kirşehir-Hirkadağ massifs, Central Anatolia, Turkey	0.084	700	0.75	933	HAG	38.86	34.569	Lefebvre et al. (2015); Whitney and Hamilton (2004)
Alanya massif, southeastern Turkey	0.085	530	1.7	312	LHPCE	36.5248	32.2681	Çetinkaplan et al. (2016)
Druer unit, Eclogitic Micaschist Complex, Sesia Zone, Western Alps	0.085	550	1.95	282	LHPCE	45.59	7.87	Regis et al. (2014)
Eclogite, Sistan Suture Zone, Iran	0.086	600	2.2	273	LHPOELp	32.472	60.369	Bröcker et al. (2013); Fotoohi Rad et al. (2005)
Lws inclusion assemblage, Kotsu eclogite unit, Sanbagawa belt, Japan	0.088	550	1.8	306	LHPOEL	34.024	134.229	Tsuchiya and Hirajima (2013); Wallis et al. (2009)
Kotsu eclogite unit, Sanbagawa belt, Japan	0.088	560	2	280	LHPOE	34.026	134.23	Weller et al. (2015b); Wallis et al. (2009)
Jadeite-garnet-glaucophasne schsits, Bizan area, Sanbagawa belt, Japan	0.088	600	2	300	LHPOE	34.061	134.517	Kabir and Takasu (2016); Wallis et al. (2009)
Koralpe (structurally above Plattengneiss), Eastern Alps	0.089	630	1.95	323	LHPCE	46.7256	15.1456	Bruand et al. (2010); Thöni (2006)
Jd-Ky eclogite, Iratsu body,central Shikoku, Sanbagawa belt, Japan	0.089	590	2.45	241	LHPOEL	33.887	133.412	Endo and Tsuboi (2013); Wallis et al. (2009)
Quartz eclogite unit, central Shikoku, Sanbagawa belt, Japan	0.089	700	2.4	292	LHPOE	33.879	133.388	Miyamoto et al. (2007; Wallis et al. (2009)
Seba eclogite unit,central Shikoku, Sanbagawa belt, Japan	0.089	650	2.15	302	LHPOE	33.859	133.369	Kabir and Takasu (2010); Wallis et al. (2009)
Sivrihisar massif, central Turkey	0.091	460	2.4	192	LHPOEL	39.56	31.217	Çetinkaplan et al. (2008); Mulcahy et al. (2014)
Saualpe (structurally below Plankogel detachment), Eastern Alps	0.091	680	2	340	LHPCE	46.8184	14.7039	Schorn (2018);Thoni et al. (2008)
Lower crustal xenoliths, Kakanui mineral breccia, Otago, New Zealand	0.092	900	0.7	1286	HUHT	-45.193	170.9	Jacob et al. (2017)
Pohorje Mountains, Eastern Alps, Slovenia	0.092	820	3.7	222	LUHPCE	15.5662	46.4167	Sandmann et al. (2016); Janák et al. (2015, 2009); Thoni et al. (2008)
Jijal Complex, Pakistan	0.095	900	1.25	720	I	35.07	72.9554	Waters and George (2015); Anczkiewicz and Vance (2000)
Sapi-Shergol Lws-blueschists, Ladakh, NW India	0.098	470	1.9	247	LHPOBL	34.461	76.265	Groppo et al. (2016; Honegger et al. (1989)
Yanai, Ryole Belt, Japan	0.1	825	0.55	1500	HAG	33.98	132.128	Skrzypek et al. (2016); Ikeda (2014); Brown (1998)
Eclogite, southern Chuacús complex, central Guatemala	0.101	670	2.4	279	LHPCE	14.96	-90.54	Maldonado et al. (2018)
Grt-cld-par schist, northern Chuacús complex, central Guatemala	0.101	515	2.1	245	LHPCB	15.055	-90.485	Maldonado et al. (2016, 2018)
Jagua Clara melange, Rio San Juan complex, Dominican Republic	0.104	585	2.3	254	LHPOE	19.5257	-70.2337	Escuder-Viruete et al. (2013); Krebs et al. (2008)
Central Pontide supercomplex (sample178), Pontides, Turkey	0.105	440	2.35	187	LHPOE	41.1713	33.9923	Aygul and Oberhansli (2017); Okay et al. (2006)
Central Pontide supercomplex (sample775), Pontides, Turkey	0.105	420	1.75	240	LHPOELp	41.1134	34.031	Aygul and Oberhansli (2017); Okay et al. (2006)
Central Pontide supercomplex (sample 753), Pontides, Turkey	0.105	475	1.7	279	LHPOE	41.1157	34.06	Aygul and Oberhansli (2017); Okay et al. (2006)
Doubtful Sound, Fjordland, New Zealand	0.113	920	1.4	657	I	-45.4	167.018	Stowell et al. (2014)
Fosdick migmatite-granite complex, Marie Byrd Land, Antarctica	0.115	870	0.75	1160	HAG	-76.464	-145.333	Yakymchuk et al. (2015); Korhonen et al. (2010)
Luk Ulo complex, central Java, Indonesia	0.118	440	2.2	200	LHPOE	-7.6221	109.662	Bröcker et al. (2017); Kadarusman et al. (2007)
Lws eclogite, Bantimala complex, south Sulawesi, Indonesia	0.124	573	2.24	256	LHPOEL	-4.7658	119.683	Bröcker et al. (2017); Wei and Clarke (2011); Parkinson and Katayama (1999)
Breaksea orthogneiss, Fjordland, New Zealand	0.127	850	1.8	472	I	-45.5971	166.675	Stowell et al. (2010); De Paoli et al. (2009)
Carrizal Grande, south Motagua Fault Zone, Guatemala	0.132	520	2.5	208	LHPOEL	14.772	-89.845	Endo et al. (2012); Brueckner et al. (2009)
Albion Mountains, Sevier hinterland, USA	0.135	600	0.65	923	HAG	42.322	-113.674	Kelly et al. (2015)
Metabasite block (SN-86), Siuna, Northeastern Nicaragua	0.14	614	1.7	361	LHPOE	13.73	-84.82	Flores et al. (2015)
Jenner, Northern California, USA	0.145	435	2.2	198	LHPOE	38.451	-123.125	Anczkiewicz et al. (2004); Ravna and Terry (2004)
Raft River Mountains, Seview hinterland, USA	0.15	600	0.7	857	HAG	41.867	-113.572	Cruz-Uribe et al. (2015)
Cazadero, Northern California, USA	0.154	504	1.8	280	LHPOEL	38.54	-123.114	Wei and Clarke (2011); Wakabayashi and Dumitru (2007)
Eclogite, Ring Mountain, Tiburon Peninsular, California, USA	0.158	585	2.35	249	LHPOE	37.911	-122.487	Tsujimori et al. (2006a); Anczkiewicz et al. (2004)
Lazaro unit, Diego de Almagro Island, Patagonia	0.162	750	1.2	625	I	-51.58	-75.18	Angiboust et al. (2017)
Garnet amphibolite, Amdo metamorphic complex, Tibet	0.178	700	1	700	I	31.79	91.76	Guynn et al. (2013, 2006)
Eclogite, North Shahrekord, Sanandaj-Sirjan zone, Iran	0.184	550	2.4	229	LHPOE	32.7875	50.6528	Davoudian et al. (2016)
Eclogite, Basu, Qiangtang, central Tibet	0.19	990	4	248	LUHPOE	30.53	96.627	Zhang et al. (2008)
Mafic granulite lens in gneiss of Amdo metamorphic complex, Tibet	0.191	890	1.51	589	I	32	91.57	Zhang et al. (2014, 2010)
Chepelare melange, Rhodope zone, Greece	0.201	745	4.05	184	LUHPCE	41.703	24.708	Petrík et al. (2016)
Basong Tso complex, North Lhasa terrane, China	0.202	690	0.9	767	HAG	29.995	93.981	Weller et al. (2015a)
Pinchi Lake, British Columbia, Canada	0.218	536	2.55	210	LHPOEL	54.628	-124.405	Wei and Clarke (2011); Ghent et al. (2009)
Rongma, central Qiangtang, Tibet	0.223	520	1.4	371	LHPOB	32.97	86.895	Pullen et al. (2008); Kapp et al. (2003)
Garnet amphibolite, Sumdo complex, Lhasa block, Tibet	0.225	490	1.6	306	LHPOE	29.9714	91.8508	Cao et al. (2017)
Xinxian, low-T UHP eclogite unit, western Dabieshan, China	0.227	610	2.9	210	LUHPCELp	31.536	114.941	Wei and Clarke (2011); Wei et al. (2010); Wu et al. (2008)
Luotian, North Dabie zone, China	0.227	970	4.25	228	LUHPCE	30.7616	115.374	Liu et al. (2015, 2011a, 2011b, 2007)
Bailang eclogite, Lhasa block, Tibet	0.23	490	2.6	188	LHPOE	29.8485	92.6465	Cheng et al. (2015)
Eclogite, Donghai, Sulu belt, China	0.23	660	3.3	200	LUHPCELp	34.52	118.9	Zong et al. (2010); Mattinson et al. (2004)
Song Ma suture zone, northern Vietnam	0.23	700	2.6	269	LHPOE	21.4761	103.305	Zhang et al. (2013)
Eclogite, Gyeonggi Massif, South Korea	0.231	840	2	420	I	36.508	126.787	Kwon et al. (2009); Kim et al. (2006)
Shuanghe (eclogite/marble), medium-T UHP eclogite zone, Dabie Shan, China	0.233	726	4.1	177	LUHPCELp	30.635	116.412	Wei et al. (2013); Liu et al. (2013); Gao et al. (2011))
Yangkou, Sulu belt, China	0.233	850	5.5	155	LUHPCE	36.2472	120.673	Xia et al. (2018); Zeng et al. (2011)
Marble, Sanqingge, Sulu belt, China	0.233	600	3.55	169	LUHPCE	34.88	118.88	Zhu et al. (2009); Liu et al. (2007)
Bixiling mafic-ultramafic complex, south Dabieshan, China	0.234	800	6	133	LUHPCP	30.734	116.28	Liu & Liou (2011); Zhang et al. (1995)
Maobei mafic-ultramafic complex, CCSD main hole, Sulu belt, China	0.234	830	6	138	LUHPCP	34.42	118.67	Liu & Liou (2011); Zhang et al. (2010)
Weihai, Sulu belt, China	0.236	660	3	220	LUHPCE	37.55	122.13	Zong et al. (2010); Banno et al. (2000)
Taohang, Sulu belt, China	0.236	700	3.4	206	LUHPCE	35.84	119.54	Li et al. (2014); Nakamura and Hirajima (2010)
Gangma Co, central Qiangtang, Tibet	0.239	435	2.25	193	LHPOE	33.558	86.171	Zhai et al. (2011); Pullen et al. (2008)
Kangjiawan, Hong'an zone, Dabie orogen, China	0.2395	570	2.25	253	LHPOE	31.216	114.58	Cheng et al. (2010)
South of Hualingting reservoir, South Dabie zone, China	0.24	670	3.7	181	LUHPCELp	30.472	116.251	Guo et al. (2015); Cheng et al. (2011); Li et al. (2004)
Blueschist, Lancang tectonic belt, Southwest China	0.242	390	1	390	LHPOB	23.1949	99.7961	Fan et al. (2015)
Lawsonite blueschist, northwestern Qiangtang, Tibet	0.242	375	1.05	357	LHPOBL	34.46	84.83	Tang and Zhang (2014)
Hongyike, north of Tongbai Mtns, China	0.247	520	2.1	248	LHPCE	33.447	113.26	Cheng et al. (2011)
Retrograded eclogite, Badu complex, Cathaysia block, South China	0.247	530	2.35	226	LHPCE	28.42	119.17	Zhao et al. (2017)
Xiongdian eclogite, Huwan Shear Zone, Hong'An, China	0.252	610	2.3	265	LHPOE	31.7523	114.475	Cheng et al. (2016)
Granulite, Imjingang Belt, South Korea	0.253	900	2	450	I	38.13	126.975	Sajeev et al. (2010)
Qianjin eclogite, Huwan Shear Zone, Hong'An, China	0.257	575	2.4	240	LHPOE	31.763	114.677	Cheng and Cao (2015)
Eclogite, Songdo, Lhasa block, Tibet	0.261	730	2.7	270	LHPOE	29.91	90.56	Zhang and Tang (2009); Yang et al. (2007)
Eclogite, Jilang, Lhasa block, Tibet	0.265	770	3.6	214	LUHPOE	29.9436	92.7857	Cheng et al. (2012)
Eclogite, St Cyr klippe, Yukon, Canada	0.268	660	2	330	LHPCE	61.155	-132.644	Petrie et al. (2016)
Gruf complex, central Alps	0.272	920	0.9	1022	HUHT	46.293	9.462	Guevara and Caddick (2016); Galli et al. (2011, 2012); Liati and Gebauer (2003)
Eclogite, Sumdo complex, Lhasa block, Tibet	0.274	670	2.7	248	LHPOE	29.8776	92.5629	Weller et al. (2016)
Fuyun, Chinese Altai, Central Asian orogenic belt, China	0.277	950	0.9	1056	HUHT	47	89.73	Li et al. (2014)
Val Malenco, north Italy	0.28	850	1.05	810	HAG	46.306	9.799	Hermann and Rubatto (2003)
Kalasu, Chinese Altai, Central Asian orogenic belt, China	0.28	950	0.825	1152	HUHT	47.543	88.475	Yang et al. (2015); Tong et al. (2014)
Altai, Chinese Altai, Central Asian orogenic belt, China	0.299	655	0.65	1008	HAG	47.84	88.154	Wang et al. (2014)
Retrogressed eclogite, Chatkal Range, South Tien Shan, Kyrgystan	0.301	490	1.85	265	LHPOE	41.445	71.22	Loury et al. (2016)
Garnet micaschist, Punta Sirena, Western Series, Coastal Accretionary Complex, Chile	0.303	550	1.2	458	I	-34.5355	-72.046	Hyppolito et al. (2014)
Eastern Montagne Noire, Massif Central, France	0.308	725	0.8	906	HAG	43.639	2.972	Fréville et al. (2016); Roger et al. (2015)
Eclogite, Montagne Noire, French Massif Central	0.315	725	1.4	518	I	43.5499	2.5915	Whitney et al. (2015)
Lws eclogite, Habutengsu Valley, southwestern Tienshan, China	0.315	510	2.45	208	LHPOEL	42.5091	81.3492	Du et al. (2014a); Klemd et al. (2011)
Meta-siliciclastic rocks, Habutengsu Valley, southwestern Tienshan, China	0.315	490	2.9	169	LUHPOEL	42.5515	81.3254	Lü et al. (2012); Klemd et al. (2011)
Eclogite, Shanderman, northern Iran	0.315	605	1.8	336	LHPOE	37.3806	48.9709	Omrani et al. (2013); Zanchetta et al. (2009)
Ivrea zone, Italy	0.316	910	1.1	827	HUHT	45.936	8.237	Ewing et al., 2013; Redler et al., 2012
Omphacite blueschist (TS1309b), Kebuerte Valley, southwestern Tienshan, China	0.318	450	2.6	173	LUHPOB	42.511	81.189	Soldner et al. (2017)
Eclogite 11AT06-1, Atantayi Valley, southwestern Tienshan, China	0.318	510	3	170	LUHPOE	42.535	81.209	Tan et al. (2017)
Type II eclogite (T848), large body east of Atantayi Valley, southwestern Tienshan, China	0.319	518	2.82	184	LUHPOE	42.495	81.265	Tian and Wei (2013); Su et al. (2010)
Lws blueschist, southwestern Tienshan, China	0.319	510	2.4	213	LHPOBL	42.5022	81.4381	Du et al. (2011); Su et al. (2010)
UHP eclogite and Jd-Lws schist, Habutengsu Valley, southwestern Tienshan, China	0.319	505	3.2	158	LUHPOBL	42.5455	81.3333	Du et al. (2014b); Klemd et al. (2011)
Eclogite, Atbashy Range, southwestern Tienshan, Kyrghyzstan	0.319	500	2.5	200	LHPOELp	41.0655	75.4916	Loury et al. (2018); Hegner et al. (2010)
Coe metapelite, Kebuerte Valley, southwestern Tienshan, China	0.32	565	2.9	195	LUHPOE	42.517	81.1806	Yang et al. (2013)
Type I eclogite (K949), Kebuerte Valley, southwestern Tienshan, China	0.32	530	2.95	180	LUHPOELp	42.519	81.187	Tian and Wei (2013); Yang et al. (2013)
Serre Massif, Calabria, Italy	0.324	900	1.1	818	HUHT	38.818	16.297	Fornelli et al. (2014); Acquafredda et al. (2008)
Golfe du Morbihan, Brittany, France	0.325	800	0.8	1000	HAG	47.542	-2.91	Augier et al. (2015); Johnson and Brown (2004); Brown and Dallmeyer (1996)
HPMU tectonic melange, Atbashy Range, southwestern Tienshan, Kyrghyzstan	0.328	560	2.55	220	LHPCE	40.9391	75.5738	Loury et al. (2018)
Ulten zone, Eastern Alps	0.333	700	1.5	467	I	46.4867	10.985	Tumiati et al. (2003); Hauzenberger et al. (1996); Godard et al. (1996)
Central Schwarzwald granulite complex, Germany	0.335	950	1.55	613	I	48.353	7.99	Kober et al. (2004); Marschall et al. (2003)
Le Conquet Schist, Leon Domain, French Massif Armoricain	0.338	675	0.7	964	HAG	48.358	-4.779	Faure et al. (2010); Jones (1994)
St Leonhard massif, southeast Bohemian Massif	0.34	770	2	385	I	48.63	15.557	Racek et al. (2008); Schulmann et al. (2005)
Varied gneiss, Central Vosges, NE France	0.34	855	1.6	534	I	48.239	7.2046	Skrzypek et al. (2012)
Metatroctolite, Stálky, Moldanubian Zone, Bohenmian Massif	0.34	750	1.1	682	I	48.858	15.692	Faryad et al. (2015)
Argentera Massif, Italy	0.34	735	1.38	533	I	44.16	7.495	Rubatto et al. (2010); Ferrando et al. (2008)
Blansky les, Bohemian Massif, Czech Republic	0.341	830	1.8	461	I	48.9	14.241	Usuki et al. (2017)
Drill core from borehole at Tirschheim, Granulitgebirge, Saxony, Germany	0.341	1010	2.25	449	I	50.81	12.62	Rötzler et al. (2004)
Erzgebirge, Saxony, Germany	0.341	830	2.1	395	I	50.67	13.23	Kröner and Willner (1998); Willner et al. (1997)
Felsic granulite, eastern Eger complex, Czech Republic	0.342	850	1.6	531	I	50.3727	13.2764	Konopásek et al. (2014)
Granulitgebirge, Saxony, Germany	0.342	1010	2.2	459	I	51	13	Sagawe et al. (2016); Hagen et al. (2008); Rötzler et al. (2008); Romer and Rötzler (2001)
Kyanite eclogite, T-7 borehole, Ceske stredohori Mtns, Bohemian Massif, Czech Republic	0.342	970	3.8	255	LUHPCE	50.4398	13.8951	Kotková and Janak (2015); Gebauer (1991)
Stráž nad Ohří, Eger complex, Czech Republic	0.342	1100	4.8	229	LUHPCE	50.339	13.0541	Haifler and Kotkova (2016); Kotková et al. (1995)
Eclogite, Blumenau, Erzgebirge, Saxony, Germany	0.343	800	3.3	242	LUHPCE	50.6616	13.3337	Schmädicke and Müller (2000); von Quadt and Gebauer (1998); Schmädicke et al. (1995)
Eclogite, Klinovec, Erzgebirge, Czech Republic	0.343	615	2.6	237	LUHPCE	50.38	13	Collett et al. (2017); von Quadt and Gebauer (1998)
North Orlica-Snieznik complex, the Sudetes, SW Poland	0.344	640	0.65	985	HAG	50.404	16.873	Skrzypek et al. (2014)
Felsic granulite, Central Vosges, NE France	0.344	924	1.3	711	I	48.1895	7.1165	Skrzypek et al. (2012)
Fosdick migmatite-granite complex, Marie Byrd Land, Antarctica	0.346	740	0.7	1057	HAG	-76.51	-145.82	Yakymchuk et al. (2015); Korhonen et al. (2012)
Asalem metamorphic complex, western Alborz, Iran	0.351	490	2.3	213	LHPOE	37.63	48.95	Rossetti et al. (2017)
Acatlan Complex, southern Mexico	0.352	760	1.63	466	I	18.3	-98.333	Estrada-Carmona et al. (2016); Galaz et al. (2013)
Flesic granulite, Vir, Bohemian Massif, Czech Republic	0.354	860	1.6	538	I	49.566	16.355	Tajcmanova et al. (2010)
Low-T eclogite, La Varenne, Champtoceaux complex, Armorican massif, France	0.355	550	1.6	344	LHPCE	47.2999	-1.3249	Paquette et al. (2017); Bosse et al. (2000); Ballevre and Marchand (1991)
Chandman, south-west Mongolian Altai, Mongolia	0.356	750	0.66	1136	HAG	45.27	98.2	Broussolle et al. (2015)
Winding Stair Gap, Southern Appalachians, USA	0.358	850	0.9	944	HAG	35.122	-83.545	El-Shazly et al. (2011); Moecher et al. (2004)
North-east Greenland, Greenland Caledonides	0.358	970	3.6	269	LUHPCE	78	18.9	McClelland et al. (2010); Gilotti and Ravna (2002)
Northeastern Connecticut, USA	0.36	1000	1	1000	HUHT	41.872	-72.278	Axler and Ague (2015a, b); Ague et al. (2013)
Lws blueschists (Cambre schists), Malpica-Tui Complex, NW Spain	0.363	560	2.2	255	LHPOBLp	43.2959	-8.7315	Lopez-Carmona et al. (2014)
Ile de Groix, Armorican Massif, France	0.365	450	1.9	237	LHPOBLp	47.6394	-3.4249	Bosse et al. (2005); Ballèvre et al. (2003)
Międzygórze, Śnieżnik Mountains, southwest Poland	0.37	715	2.1	340	LHPCE	50.1627	16.7643	Štípská et al. (2012); Bröcker et al. (2010)
Northeast Orlica-Snieznik complex, the Sudetes, SW Poland	0.374	900	1.9	474	I	50.368	16.997	Anczkiewicz et al. (2007); Stipska et al. (2004)
Eclogite boudins in gneisses, Malpica-Tui Complex, NW Spain	0.376	630	2.4	263	LHPCE	43.02	-8.96	Puelles et al. (2017); Li et al. (2017)
Běstvina granulite, Kutná Hora complex, Bohemian Massif, Czech Republic	0.38	700	3.7	189	LUHPCE	49.8195	15.5783	Jedlicka et al. (2015); Perraki and Faryad, 2014); Nahodilová et al. (2014)
Eclogite, Munchberg Massif, Germany	0.384	725	3	242	LUHPOE	50.12	11.67	Liebscher et al. (2007); Stosch and Lugmair (1990)
Stary Gieraltów, Śnieżnik Mountains, southwest Poland	0.387	875	2.7	324	LHPCE	50.3085	16.9339	Ferrero et al. (2015); Anczkiewicz et al. (2007); Bröcker and Klemd (1996)
Mariánské-Lázne complex, Bohemian Massif, Czech Republic	0.387	685	2.5	274	LUHPOE	50.05	12.767	Collett et al. (2018)
Maksyutov Complex, southern Urals	0.388	680	3.2	213	LUHPOE	52	57.5	Leech and Willingshofer (2004); Bostick et al. (2003); Leech and Ernst (1998)
Granulite, Yushugou, southeastern Tienshan, China	0.392	975	1.3	750	I	42.282	87.911	Zhang et al. (2016); Zhou et al. (2004)
Góry Sowie Mountains, southwest Poland	0.395	910	1.8	506	I	50.751	16.428	Kryza and Fanning (2007); O'Brien et al. (1997); Kryza et al. (1996)
Lofoten, Norway	0.399	665	2.65	251	LHPCE	68.1044	13.2581	Froitzheim et al. (2016)
Liverpool Land, East Greenland	0.399	800	2.5	320	LHPCE	70.5723	22.1884	Corfu and Hartz (2011); Hartz et al. (2005)
Eclogite, Punta de li Tulchi, Sardinia	0.403	690	1.9	363	I	40.7444	9.713	Cruciani et al. (2012); Cortesogno et al. (2004)
Migmatitic gneisses, Hongseong area, southern Gyeonggi block, South Korea	0.403	850	1.15	739	I	36.45	126.643	Kim et al. (2017)
Payer Land, NE Greenland	0.405	825	1.6	516	I	74.5	-23.375	McClelland and Gilotti (2003); Elvevold et al. (2003); Gilotti and Elvevold (2002)
Baekdong eclogite, Hongseong area, southern Gyeonggi blockSouth Korea	0.405	1000	2.3	435	I	36.56	126.75	Oh et al. (2014); Kwon et al. (2009)
Harøya, Nordøyane, Western Gneiss Region, Norway	0.405	815	3.25	251	LUHPCE	62.742	6.4284	Cutts and Smit (2018); Kohn et al. (2015); Butler et al. (2013)
Fjørtoft, Nordøyane, Western Gneiss Region, Norway	0.405	820	3.9	210	LUHPCE	62.7103	6.3778	Cutts and Smit (2018); Kohn et al. (2015); Terry et al. (2000)
Nordfjord, Western Gneiss Region, Norway	0.405	700	3.3	212	LUHPCE	61.9153	5.7376	Cutts and Smit (2018); Kohn et al. (2015); Young et al. (2007)
Monts du Lyonnais, Massif Central, France	0.408	750	2.8	268	LUHPOE	45.5554	4.6185	Lardeaux et al. (2001); Paquette et al. (1995)
Hongliuxia, southern Dunhuang complex, Altyn Tagh	0.411	830	2.42	343	LHPOE	39.78	95.459	Wang et al. (2017)
Roche L'Abeille, Limousin, Massif Central, France	0.412	660	3	220	LUHPOE	45.6105	1.2546	Berger et al. (2010)
Xiangtaohu, central Qiantang, Tibet	0.425	845	1.3	650	I	34.2	85.01	Zhang et al. (2014)
Jættedal complex, Liverpool Land, East Greenland	0.425	850	1.1	773	I	70.55	-22.25	Johnston et al. (2015)
Qinling Group, Tongbai Orogen, China	0.426	800	0.85	941	HAG	32.465	113.375	Bader et al. (2014); Wu et al. (2014); Liu et al. (2011); Wang et al. (2011)
East Kunlun, western China	0.428	620	1.6	388	I	35.594	99.18	Meng et al. (2013)
Wilmington complex, Delaware, USA	0.43	800	0.7	1143	HAG	39.75	-75.58	Aleinikoff et al. (2006); Srogi et al. (1993)
Holsnøy, Bergen Arca, Norway	0.43	750	1.8	417	I	60.5975	4.996	Glodny et al. (2008)
Eclogite, Holsnoy, Bergen Arcs, Norway	0.43	680	2.15	316	LHPCE	60.59	5.01	Bhowany et al. (2018)
Dunhuang, Tarin Craton	0.431	780	1.5	520	I	40.1	95.86	He et al. (2014)
Metabasic rock, Roan, Vestranden, northern Western Gneiss region, Norway	0.432	870	1.45	600	I	64.145	10.18	Dallmeyer et al. (1992); Johansson and Möller (1986)
Coe eclogite block, Yuka, North Qaidam, NW China	0.433	652	3.01	217	LUHPCE	38.0083	94.9417	Zhang et al. (2016; 2009)
Dulan, North Qaidam, western China	0.435	870	1.7	512	I	36.526	98.39	Yu et al. (2014; 2011)
Xitieshan, North Qaidam, NW China	0.435	770	2.95	261	LUHPCE	37.4	95.5083	Song et al. (2014); Zhang et al. (2011)
Lws eclogite block, Yuka, North Qaidam, NW China	0.436	570	2.7	211	LHPOELp	37.998	94.917	Ren et al. (2017)
Ky eclogite block, Yuka, North Qaidam, NW China	0.437	660	3.2	206	LUHPOE	38	94.929	Ren et al. (2018)
Lower unit, Kuanping Group, Huilongsi, Tongbai Orogen	0.44	592	1.02	580	I	32.618	113.729	Liu et al. (2011)
Eidet, Kalak Nappe Complex, northern Norway	0.44	630	1.13	558	I	69.912	20.968	Gasser et al. (2015)
Ky-Grt gneiss, Areskutan, Seve nappe complex, Sweden	0.442	835	4.05	206	LUHPCE	63.4333	13.0833	Klonowska et al. (2017); Ladenberger et al. (2014)
North Dulan, North Qaidam, NW China	0.445	892	3.68	242	LUHPCE	36.5996	98.464	Han et al. (2015); Song et al. (2014)
South Dulan, North Qaidam, NW China	0.445	700	3.3	212	LUHPCE	36.511	98.661	Ren et al. (2016)
Tromsdalstind, Tromsø Nappe, Norway	0.45	775	3.25	238	LUHPCE	69.6071	19.1458	Janák et al. (2012); Corfu et al. (2003)
Tonsvika, Tromsø Nappe, Norway	0.452	770	3.5	220	LUHPCE	69.7442	19.1521	Janák et al. (2013); Corfu et al. (2003)
Northwest Connecticut, USA	0.456	710	1.45	490	I	41.9485	-73.1988	Chu et al. (2016)
Tjeliken eclogite, Seve nappe complex, Sweden	0.458	700	2.6	269	LHPCE	64.5571	14.7334	Fassmer et al. (2017)
Eclogite, Bakersville, Eastern Blue Ridge, Southern Appalachians	0.46	700	1.6	438	I	36.0395	-82.1356	Miller et al. (2010); Page et al. (2003)
Stor Jougdan, Seve Nappe Complex, Sweden	0.46	815	3.5	233	LUHPCE	64.5332	14.7483	Klonowska et al. (2016); Brueckner and van Roermund (2007)
Harts Range meta-igneous Complex, central Australia	0.462	880	1.05	838	HAG	-23.111	135.469	Tucker et al. (2015a); Maidment et al. (2013)
Eclogite, Gubaoquan, Chinese Beishan, southern Altaids	0.465	755	1.6	472	I	40.988	95.042	Qu et al. (2011); Liu et al. (2011)
Naver Nappe, Moine Supergroup, north Sutherland, Scotland	0.467	675	1.15	587	I	58.525	-4.264	Friend et al. (2000); Kinny et al. (1999)
Lawsonite/carpholite blueschists, lower unit, Motalafjella, Spitsbergen	0.47	400	1.55	258	LHPOBL	78.4292	12.9167	Agard et al. (2005); Dallmeyer et al. (1990a); Hirajima et al. (1984)
Blueschist, Nordenskiöld Land, Spitsbergen	0.47	480	1.6	300	LHPOB	77.8813	13.7169	Kosminska et al. (2014)
Makbal, Northern Tianshan, Kyrgyzstan	0.47	550	2.9	190	LUHPOELp	42.773	72.0748	Orozbaev et al. (2015); Meyer et al. (2014); Rojas-Agramonte et al. (2013)
Jaeren nappe, SW Norway	0.471	620	2.55	243	LHPCE	58.6813	5.7051	Smit et al. (2010, 2008)
Port Macquarie, New South Wales, Australia	0.472	530	2.3	230	LHPOB	-31.435	152.925	Tamblyn et al. (2017, Pers. Comm.)
Lunna Ness, Mainland, Shetland	0.474	775	1	775	I	60.449	-1.052	Cutts et al. (2011)
Aktyuz, Northern Tianshan, Kyrgyzstan	0.474	670	2.1	319	LHPCE	42.8857	76.13	Klemd et al. (2014); Rojas-Agramonte et al. (2013)
Eclogite, upper unit, Motalafjella, Spitsbergen	0.475	600	2	300	LHPOE	78.4333	12.8833	Bernard-Griffiths et al. (1993); Hirajima et al. (1988)
Migmatite, Sierra de Valle Fértil, Famatinian magmatic arc, Argentina	0.477	825	0.66	1250	HAG	-30.75	-67.57	Tibaldi et al. (2011); Ducea et al. (2010)
Tjidtjak eclogite, Norrbotten, Sweden	0.482	700	3	233	LUHPCE	66.6045	16.3917	Bukala et al. (2018); Root and Corfu (2012)
North Altyn Tagh, China	0.489	490	2.25	218	LHPOEL	39.113	90.5	Zhang et al. (2007); Zhang & Meng (2006); Zhang et al. (2005)
Eclogite, ESE of Qilian, North Qilian, China	0.489	585	2.6	225	LHPOEL	38.1518	100.3	Wei et al. (2009); Zhang et al. (2007)
Eclogite, WNW of Qilian, North Qilian, China	0.489	540	2.2	245	LHPOE	38.3125	99.9222	Wei et al. (2009); Song et al. (2007); Zhang et al. (2007)
Port Macquarie, New South Wales, Australia	0.49	590	2.7	219	LUHPOEL	-31.435	152.925	Tamblyn et al. (2017, Pers. Comm.)
Dia eclogite, North Qinling, China	0.49	689	3.5	197	LUHPCE	33.56	110.747	Wang et al. (2014)
Eclogite, Attunga, southern New England Orogen, Australia	0.491	650	2.24	290	LHPOE	-30.8388	150.912	Manton et al. (2017); Phillips et al. (2015)
Eclogite, North Qinling, China	0.494	700	2.75	255	LHPCE	33.7917	111.833	Cheng et al. (2012)
South Altyn Tagh, NW China	0.495	950	2.14	444	I	38.35	88.6	Zhang et al. (2014, 2005)
South-west Altyn Tagh, China	0.5	830	2.9	286	LUHPCE	37.9	86.6458	Liu et al. (2012)
Madras Granulites, India (average 8 samples)	0.51	860	0.85	1012	HAG	12.965	80.123	Pattison et al. (2003)
Eclogite, Lanterman Range, Northern Victoria Land, Antarctica	0.51	725	2.5	290	LUHPCE	-71.72	163.15	Di Vincenzo et al. (2016)
Collingwood River, Franklin Metamorphic Complex, Tasmania	0.511	630	1.8	350	LHPCE	-42.1	145.833	Palmeri et al. (2009); Black et al. (1997)
Taylor/Brocklehurst/Meredith, Northern Prince Charles Mountains, East Antarctica	0.515	810	0.63	1286	HAG	-70.84	67.5	Morrissey et al. (2016)
Central Damara Belt, Namibia	0.52	750	0.5	1500	HAG	-22.453	15.121	Longridge et al. (2014); Ward et al. (2008); Jung and Mezger (2003)
Southeast of Ida dome, Swakop River, southwestern Central Zone, Damara Belt, Namibia	0.52	520	0.49	1061	HAG	-22.73	15.02	Longridge et al. (2017)
Mawson Escarpement, Southern Prince Charles Mountains, East Antarctica	0.524	630	0.6	1050	HAG	-72.94	68.23	Phillips et al. (2009); Corvino et al. (2008)
Panagad, Palghat Cauvery shear system, Southern Indian	0.525	930	0.76	1224	HUHT	11.1	78.1	Clark et al. (2009)
Kaoko Belt, Namibia	0.525	750	0.8	938	HAG	-19.349	13.3	Jung et al. (2014)
Búzios succession, Cabo Frio tectonic domain, Brazil	0.525	760	0.9	844	HAG	-22.78	-41.89	Schmitt et al. (2004)
Ultramafic rocks, Shackleton Range, East Antarctica	0.525	825	2.3	359	I	-80.3898	-29.8565	Romer et al. (2009)
Ultramafic rocks, Shackleton Range, East Antarctica	0.525	825	2.4	344	LHPCE	-80.375	-30	Romer et al. (2009)
Barchi-Kol, Kokchetav Massif, northern Kazakhstan	0.528	1000	4.9	204	LUHPCE	53.1598	68.7064	Stepanov et al. (2016); Hermann et al. (2001)
Gjelsvikfjella, Central Maud belt, East Antarctica	0.529	747	0.825	905	HAG	-72.167	2.633	Bisnath et al. (2006, 2005)
Whiteschists, Solwezi dome, internal zone Lufilian Arc, Zambia	0.53	750	1.3	577	I	-12.1667	26.3245	Eglinger et al. (2014, 2015); John et al. (2004)
Kulet eclogite, Kokchetav Massif, northern Kazakhstan	0.532	700	3.2	219	LUHPCE	53.0152	69.5158	Zhang et al. (2016; 2012)
Kumdy-Kol, Kokchetav Massif, northern Kazakhstan	0.537	1035	7	148	LUHPCE	53.1384	68.9742	Katayama and Maruyama (2009); Katayama et al. (2001)
Bemarivo Belt, northern Madagascar	0.54	950	0.9	1056	HUHT	-14.5	49.75	Jöhns et al. (2009, 2006)
Anosyen domain, southeastern Madagascar	0.54	900	0.625	1440	HUHT	-23.5	46	Horton et al. (2016); Boger et al. (2012)
Achankovil zone, southern India	0.544	950	0.7	1357	HUHT	9.31	76.74	Taylor et al. (2015)
McKaskle Hills, East Amery Ice Shelf, East Antarctica	0.545	865	0.7	1236	HAG	-69.786	72.5	Morrissey et al. (2016)
Grove Mountains, East Antarctica	0.545	805	1.3	619	I	-72.9877	75.2295	Liu et al. (2009)
Kuiseb River, Damara Belt, Namibia	0.545	610	1.07	570	I	-23.4825	15.7611	Cross et al. (2015); Meneghini et al. (2014
Southern Granulite Terrain, India	0.55	1000	1.25	800	HUHT	10.2	77.7	Clark et al. (2015); Brandt et al. (2011)
Davenport shear zone, Musgrave Ranges, Musgrave Block, Australia	0.55	650	1.2	542	I	-26.35	131.53	Camacho et al. (1997); Ellis and Maboko (1992)
Kakkod, central Trivandrum block (Kerala Khondalite Belt), India	0.552	875	0.8	1094	HAG	8.81	76.81	Blereau et al. (2016)
Blueschist, Anglesey, UK	0.553	415	0.8	519	LHPOBL	53.2237	-4.177	Horsfall et al. (2009); Gibbons and Mann (1983)
Rundvågshetta, Lutzow-Holm Bay, East Antarctica	0.555	1000	1	1000	HUHT	-69.9	39.05	Tsunogae et al. (2016); Yoshimura et al. (2008)
Kanjampara, central Trivandrum block (Kerala Khondalite Belt), India	0.56	850	0.65	1308	HAG	8.61	76.9	Harley and Nandakumar (2016)
Nagercoil block, southern India	0.56	930	0.7	1329	HUHT	8.13	77.516	Johnson et al. (2015)
Western Mann Ranges, Musgrave Block, Australia	0.56	735	1.2	613	I	-25.923	129.436	Gregory et al. (2009); Scrimgeour and Close (1999)
Khondalite, Central Highland Complex, Sri Lanka	0.57	1000	1	1000	HUHT	7.124	80.567	Dharmapriya et al. (2017); Sajeev et al. (2010)
Brattskarvet, Eastern H.U. Sverdrupfjella, East Antarctica	0.57	930	1.45	641	I	-72.0972	1.3826	Pauly et al. (2016)
Shear zones, Bates region, Musgrave Block, Australia	0.57	750	1.2	625	I	-25.795	128.884	Raimondo et al. (2010)
Rio de Janeiro city outcrops, Costeiro domain, Oriental terrane, Ribeira Belt, Brazil	0.577	800	0.7	1143	HAG	-22.957	-43.17	Kühn et al. (2004); Heilbron and machado (2003)
Southern Victoria Land, Ross orogen, Antarctica	0.58	675	0.55	1227	HAG	-78.23	163.133	Hagen-Peter et al. (2016)
Turvo-Cajati Formation, Curitiba terrane, Ribeira Belt, Brazil	0.584	790	1.13	699	I	-24.32	48.358	Faleiros et al. (2016, 2011)
Mather Peninsula, Rauer Islands, Prydz Bay, E Antarctica	0.586	1010	1.1	918	HUHT	-68.85	77.917	Harley et al. (2013); Harley (2008)
Eclogite, Ubendian Belt, Tanzania	0.593	740	1.8	411	I	7.1	31	Boniface et al. (2012b)
Sabaloka, eastern margin of the east Sahara ghost craton, north Sudan	0.602	950	0.55	1727	HUHT	16.142	32.833	Karmaker and Schenk (2015b)
Central African fold belt, north-central Cameroon	0.604	875	1.2	729	I	6.889	11.879	Bouyo et al. (2013, 2009)
NE Ox Inlier, NW Ireland	0.605	875	1.45	603	I	54.213	-8.391	Sanders et al. (1987)
Eclogite, Lato Hills, south Togo	0.609	710	2.9	245	LUHPCE	7.1	0.8	Ganade de Araujo et al. (2014); Agbossoumonde et al. (2001)
Eclogite, Gourma Nappe complex, northern Mali	0.611	720	3.2	225	LUHPCE	17	-0.7586	Ganade de Araujo et al. (2014); Caby (1994)
Vohibory block, southern Madagascar	0.612	850	1.1	773	I	-24.06	44.77	Jöns and Schenk (2008)
Cariré granulite region, NW Borborema Province, NE Brazil	0.613	750	1.02	735	I	-3.833	-40.5	Amaral et al. (2012)
Forquilha eclogite zone, NW Borborema Province, NE Brazil	0.615	770	2.8	275	LUHPCE	-3.9231	-40.134	Santos et al. (2009); Ganade de Araujo et al. (2014); Santos et al. (2015)
Carvalhos Klippe, southern Brasília Belt, Brazil	0.618	840	1.6	525	I	-22	-44.45	Cioffi et al. (2012); Campos Neto et al. (2010)
Eclogite, Richarddalen Complex, Biscayarhalvøya, Spitsbergen	0.62	723	2	362	LHPCE	79.7667	12.3115	Elvevold et al. (2013); Dallmeyer et al. (1990b); Peucat et al. (1989)
Guaxupé Nappe, southern Brasília Belt, Brazil	0.621	860	1.1	782	HAG	-21.531	-46.825	Salazar Mora et al. (2014); Motta Garcia and Campos Neto (2003)
Eclogite, southern Dahomeyide Belt, Ghana	0.621	600	1.6	375	I	5.88	0.06	Attoh (1998); Hirdes and Davis (2002)
Tidéridjaouine, Tassendjanet terrane, Western Hoggar, Algeria	0.623	660	2.1	314	LHPCE	22.6412	21858	Berger et al. (2014)
Brattnipene, southwestern terrane, Sør Rondane Mountains, East Antarctica	0.627	860	0.85	1012	HAG	-71.83	24.535	Baba et al. (2013); Adachi et al. (2013)
Alfenas quarry, Socorro-Guaxupe Nappe, Brasilia Belt, Brazil	0.628	1125	1.3	865	HUHT	-21.456	-45.975	Rocha et al. (2017)
Retro-eclogite, Pirajui, southern Brazilia Belt, Brazil	0.63	720	1.3	554	I	-21.9932	-49.4459	Coelho et al. (2017)
Retro-eclogite, 20km northeast of Pouso Allegre, southern Brazilia Belt, Brazil	0.63	690	1.34	515	I	-21.988	-45.89	Tedeschi et al. (2017)
Anápolis-Itauçu complex, Southern Brasília Belt, Brazil	0.64	1000	0.9	1111	HUHT	-16.25	-49.37	Baldwin & Brown (2008); Baldwin et al. (2005)
Gadel Group, Tarkhait, central Mauritanides, West Africa	0.64	600	1.1	545	I	17.447	-12.919	Caby and Kienast (2009)
Schirmacher Hills, East Antarctica	0.644	800	0.8	1000	HAG	-70.83	11.85	Baba et al. (2010, 2008)
Três Pontas-Varginha Nappe, southern Brasília Belt, Brazil	0.65	900	1.5	600	I	-21.4144	-45.4751	Reno et al. (2012)
Três Pontas-Varginha Nappe, southern Brasília Belt, Brazil	0.65	900	3	300	LUHPCE	-21.414	-45.475	Reno et al. (2012); Parkinson et al. (2001)
Meta-anorthosite, Uluguru Mountains, Tanzania	0.651	900	1.25	720	I	-7.1	37.5	Tenczer et al. (2011, 2006)
Furua complex, Mahenge Mountains, southern Tanzania (average 16 samples)	0.652	900	1.26	714	I	-8.9917	36.3319	Pattison et al. (2003); Coolen et al. (1982)
Xiongqian, North Lhasa, Tibet	0.653	710	1.75	406	I	30.77	89.87	Zhang et al. (2012)
Central Zambia	0.654	755	2.83	267	LUHPOE	-14.4765	28.2553	John et al. (2003, 2004)
Tighsi, Egere terrane, Central Hoggar, Algeria	0.685	860	1.9	453	I	25.3333	6	Liégeois et al. (2003); Arab et al. (2015)
Azrou N'Fad, Central Hoggar, Algeria	0.685	760	1.5	507	I	22.5	6.1125	Liégeois et al. (2003); Zetoutou et al. (2004)
Tin Begane, Central Hoggar, Algeria	0.685	790	1.5	527	I	21.634	5.221	Liégeois et al. (2003)
Tighsi, Egere terrane, Central Hoggar, Algeria	0.685	694	1.96	354	LHPOE	25.3333	6	Doukkari et al. (2014); Liégeois et al. (2003)
Adrar Izzilatène, Egere terrane, Central Hoggar, Algeria	0.685	670	2	335	LHPOE	25.2784	6	Doukkari et al. (2015); Liégeois et al. (2003)
Eidet, Kalak Nappe Complex, northern Norway	0.702	768	0.93	826	HAG	69.91	20.96	Gasser et al. (2015)
Glen Urquhart, Glenfinnan Group, Moine Supergroup, Scotland	0.725	700	0.9	778	HAG	57.38	-4.56	Cutts et al. (2010)
Barro Alto complex, Northern Brasília Belt, Brazil	0.754	980	0.8	1225	HUHT	-15.053	-49.031	Giustina et al. (2011); Moraes et al. (2006); Moraes and Fuck (2000)
Meta-ironstone, Aksu blueschist terrane, western China	0.755	320	1.15	278	LHPOB	41.0617	80.225	Xia et al. (2018); Yong et al. (2013); Zhang et al. (1999)
NE margin Tarim craton, Tibet	0.788	810	1	810	HAG	41.699	86.944	He et al. (2012)
Polnish, Morar Group, Moine Supergroup, NW Scotland	0.788	650	0.8	813	HAG	56.89	-5.71	Cutts et al. (2009); Vance et al. (1998)
Welayati Formation, Kabul Block, Afghanistan	0.82	640	0.9	711	I	34.467	69.177	Faryad et al. (2015); Collett and Faryad (2015)
Korla, northern Tarim Craton, China	0.825	685	1.2	571	I	41.8	86.235	Ge et al. (2016)
Mount Brown, Princess Elizabeth Land, East Antacrtica	0.902	860	0.77	1117	HAG	-68.568	86.098	Liu et al. (2016)
Oygarden group, Kemp Land, East Antarctica	0.926	950	0.85	1118	HUHT	-67	57.4	Halpin et al. (2013, 2007a); Kelley et al. (2004)
Contact metamorphism, Rogaland, Norway	0.93	950	0.6	1583	HUHT	58.596	5.783	Blereau et al. (2017)
Northern Prince Charles Mountains, East Antarctica	0.93	865	0.65	1331	HAG	-70.5	66	Morrissey et al. (2015)
Cape Bruce, MacRobertson Land, East Antarctica	0.941	830	0.6	1383	HAG	-67.44	60.9	Halpin (2013, 2007b)
Mawson Escarpement, Southern Prince Charles Mountains, East Antarctica	0.945	800	0.68	1176	HAG	-72.9	68.1	Phillips et al. (2009); Corvino et al. (2008)
Vestfold Hills, Prydz Bay, East Antarctica	0.95	830	0.9	922	HAG	-68.64	77.95	Liu et al. (2014)
Forbes Glacier, MacRobertson Land, East Antarctica	0.961	910	0.6	1517	HUHT	-67.63	62.54	Halpin (2013, 2007b)
Stillwell Hills, East Antarctica	0.965	920	0.87	1057	HUHT	-67.45	59.35	Halpin et al. (2013, 2007a)
Chotanagpur gneiss comples, Eastern Indian Tectonic Zone	0.97	800	1.1	727	I	57.15	-5.68	Chatterjee et al. (2010, 2008)
Eclogite-bearing nappe, eastern segment, Sveconorwegian orogen, southwest Sweden	0.974	765	1.6	478	I	57.71	12.84	Hegardt et al. (2005)
Basal shear zone, eclogite-bearing nappe, Eastern segment, Sveconorwegian orogen, southwest Sweden	0.988	870	1.8	483	I	57.155	12.733	Tual et al. (2017); Möller et al. (2015)
Mollendo-Camana Block, Arequipa-Antofalla Basement, central Andean Margin	1	900	0.9	1000	HUHT	-16.683	-72.335	Casquet et al. (2010); Martingole and Martelat (2003)
Anantagiri, Eastern Ghats Province	1	1020	0.7	1457	HUHT	18.237	83.014	Korhonen et al. (2014, 2013a)
Sunkarametta, Eastern Ghats Province, India	1	955	0.78	1224	HUHT	18.273	82.956	Korhonen et al. (2013a, b)
Paderu, Eastern Ghats Province, India	1	950	0.83	1145	HUHT	18.054	82.557	Korhonen et al. (2013b, 2011)
Sostrene Island, Larsemann Hills, Prydz Bay, E Antarctica	1	900	1	900	HUHT	-69.54	75.5	Wang et al. (2008); Hensen et al. (1995); Hensen and Zhou (1995)
Eclogite/websterite, eastern unit, Glenelg-Attadale inlier, northwest Scotland	1.01	750	2	375	I	57.23	-5.6	Storey et al. (2005); Rawson et al. (2001); Sanders et al. (1984)
Garzon Massif, Colombia	1.015	965	0.7	1379	HUHT	1.74	-75.75	Altenberger et al. (2012); Cordani et al. (2005)
Wakole Terrane, Ubendian Belt, Tanzania	1.022	747	0.91	821	HAG	6.939	30.886	Boniface et al. (2014)
Namaqualand terrane, southwestern Namaqua metamorphic complex, Namibia	1.03	890	0.55	1618	HAG	-30.5	18.5	Robb et al. (1999); Holland et al. (1996)
Bamble terrane, Sveconorwegian belt, south Norway	1.03	940	1.05	895	HUHT	58.424	8.775	Kihle et al. (2010); Bingen et al. (2008)
Chipata Terrane, southern Irumide Belt, Zambia	1.03	1000	0.65	1538	HUHT	-13.788	32.161	Karmaker and Schenk (2016)
Regional metamorphism, Rogaland, Norway	1.035	900	0.75	1200	HUHT	58.83	6.28	Blereau et al. (2017)
Northern domain, Sausar mobile belt, central Indian tectonic zone	1.04	850	1	850	HAG	21.705	78.871	Bhowmik et al. (2012); Bhowmik and Spiering (2004); Brown and Phadke (1988)
Lac Espadon suite, Manicouagan Imbricate zone, Grenville Province, Quebec, Canada	1.042	855	1.7	503	I	51.7	-68.2	Cox and Indares (1999); Cox et al. (1998)
Southern Baie du Nord segment, Manicouagan Imbricate zone, Grenville Province, Quebec, Canada	1.046	865	1.5	577	I	51.67	-68.43	Indares et al. (2008); Cox et al. (1998)
Lunden dike, Idefjorden terrane, Sveconorwegian orogen, southwest Sweden	1.046	740	1.5	493	I	58.29	12.395	Sönderlund et al. (2008)
Aus terrane, southwestern Namaqua metamorphic complex, southern Namibia	1.05	825	0.55	1500	HAG	-26.683	16.001	Diener et al. (2013)
Eastern Lelukuau terrane, Manicouagan Imbricate zone, Grenville Province, Quebec, Canada	1.05	850	1.6	531	I	51.88	-68.45	Yang and Indares (2005); Indares et al. (1998)
Location 244, Canyon Domain, Manicouagan Imbricate zone, Grenville Province, Quebec, Canada	1.061	880	1.5	587	I	51.655	-68.705	Lasalle and Indares (2014); Lasalle et al. (2014)
Western Central Gneiss Belt, Grenville Province, Ontario, Canada	1.09	725	1.6	453	I	45.025	-80.025	Marsh and Culshaw (2014)
Chewings Range, Warumpi Province, central Australia	1.13	570	0.35	1629	HAG	-23.7	133.13	Morrissey et al. (2011)
Haasts Bluff domain, Warumpi Province, central Australia	1.13	810	0.55	1473	HAG	-23.63	132.73	Wong et al. (2015)
Jordan Ranch, Llano uplift, Texas	1.135	790	2.4	329	LHPCE	30.84	-99.225	Carlson et al. (2007)
Adirondack Highlands, Grenville Province, North America (average 11 samples)	1.156	820	0.92	891	HAG	43.158	-74.54	Peck et al. (2010); Pattison et al. (2003)
Highjump Archipelago, East Antarctica	1.183	913	0.865	1055	HUHT	-66	101	Tucker and Hand (2016)
Eastern Musgrave Province, South Australia	1.19	900	0.63	1429	HUHT	-25.848	133.418	Tucker et al. (2015b)
Kakamas terrane, central Namaqua metamorphic complex, South Africa	1.2	900	0.5	1800	HUHT	-28.85	19.595	Bial et al. (2015)
Aggeneys terrane, western Namaqua metamorphic complex, South Africa	1.2	650	0.5	1300	HAG	-29.198	18.87	Diener (2014); Bailie et al. (2007)
Western Musgrave Province, Western Australia	1.2	1000	0.75	1333	HUHT	-26.25	128	Walsh et al (2015); Smithies et al. (2011)
Mutherbukin zone, Capricorn orogen, Western Australia	1.21	650	0.7	929	HAG	-24.218	115.38	Korhonen et al. (2015)
Fraser Range Metamorphics, Frazer zone, Albany-Fraser orogen, Australia	1.29	850	0.9	944	HAG	-32.167	122.683	Clark et al. (2014)
Coramup Gneiss, central Biranup zone, Albany-Fraser orogen, Australia	1.302	850	1	850	HAG	-33.873	121.674	Bodorkos and Clark (2004); Nelson et al. (1995)
Contact aureole, Makhavinekh Lake pluton, northern Labrador, Canada	1.322	950	0.45	2111	HUHT	56.27	-62.19	Mitchell et al. (2014); McFarlane et al. (2005, 2003)
Picuris orogen, New Mexico, USA	1.4	600	0.45	1333	HAG	36.35	-106.05	Aronoff et al. (2016); Barnhart et al. (2012)
Romeleåsen horst, southwest Sweden	1.451	750	0.5	1500	HAG	55.582	13.534	Ulmius et al. (2015)
Epembe unit, Epupa complex, NW Namibia	1.5	1000	0.95	1053	HUHT	-17.575	13.608	Brandt et al. (2007); Seth et al. (2003)
Natki, north Singhbhum mobile belt, India	1.547	680	1.1	618	I	22.767	82.417	Rekha et al. (2011); Mahato et al. (2008)
Eastern Raynolds Range, central Australia	1.576	850	0.7	1214	HAG	-22.583	133.3	Morrissey et al. (2014)
Southeast Anmatjira Range, central Australia	1.58	900	0.7	1286	HUHT	-22.24	133	Anderson et al. (2013)
Coober Pedy ridge, northern Gawler craton, Australia	1.586	920	0.65	1415	HUHT	-29	135	Cutts et al. (2011)
Mabel Creek ridge, northern Gawler craton, Australia	1.597	860	0.9	956	HAG	-28.5	133.5	Cutts et al. (2011)
Bhandara-Balaghat domain, central Indian tectonic zone	1.6	930	0.8	1163	HUHT	21.719	80.107	Bhowmik et al. (2014); Bhandari et al. (2011)
Garo Hills, Shillong-Meghalaya Plateau, NE India	1.6	850	0.8	1063	HAG	25.929	90.534	Chatterjee (2017)
Ongole domain, Eastern Ghats belt, India	1.625	1000	0.67	1493	HUHT	16.64	80.46	Sarkar and Schenk (2014); Sarkar et al. (2014)
Mount Liebig area, Warumpi province, central Australia	1.64	800	0.95	842	HAG	-23.25	131.56	Scrimgeour et al. (2005)
Wilson Lake terrane, Labrador, Canada	1.646	950	0.93	1022	HUHT	53.34	-62.89	Korhonen et al. (2012)
Ooldea, western Gawler craton, Australia	1.685	915	0.7	1307	HUHT	-30.459	131.833	Cutts et al. (2013)
Mt Hay block, Arunta complex, central Australia	1.7	798	0.76	1050	HAG	-23.467	133.08	Waters-Tormey et al. (2016); Claoue-Long and Hoatson (2005)
Shoal Point, S Gawler craton, South Australia	1.72	820	0.85	965	HAG	-34.776	135.499	Dutch et al. (2010)
Strangways metamorphic complex, Arunta complex, central Australia	1.73	850	0.85	1000	HAG	-22.962	134.121	Diener et al. (2008); Möller et al. (2003)
Magnetite gneisses, Warramboo, southeastern Gawler craton, Australia	1.731	850	0.6	1417	HAG	-33.254	135.649	Morrissey et al. (2016); Lane et al. (2015)
South Yenisei Ridge (sample 112-73), Siberian craton	1.74	988	0.89	1110	HUHT	56.4215	94.25	Likhanov et al. (2016)
South Yenisei Ridge (sample 115-72), Siberian craton	1.74	933	0.76	1228	HUHT	56.7247	94	Likhanov et al. (2016)
HPG block, Black Hills, South Dakota, USA	1.75	680	0.63	1079	HAG	43.875	-103.583	Nabelek and Chen (2014); Dahl et al. (2005)
Eclogite, western unit, Glenelg-Attadale inlier, northwest Scotland	1.75	650	1.4	464	I	57.15	-5.68	Storey et al. (2010); Storey (2008)
Tobacco Root Mountains, Montana, USA	1.78	850	0.95	895	HAG	45.54	-112.04	Cheney et al., 2004a, b
Eastern granulite facies zone, Thompson Nickel Belt, Manitoba, Canada	1.79	800	0.7	1143	HAG	55.85	-97.86	Couëslan et al. (2013); Couëslan & Pattison (2012)
Pelite Zone, Ketilidian Belt, Greenland (average 9 samples)	1.79	940	0.58	1621	HUHT	60.144	-44.313	Pattison et al. (2003); Garde et al. (2002); Dempster et al. (1991)
Rudall complex, central W Australia	1.79	750	1.1	682	I	-22.543	122.142	Bagas (2004); Smithies and Bagas (1997)
Zone 4, Mount Stafford, central Australia	1.8	800	0.4	2000	HAG	-22	132.7	Rubatto et al. (2006); White et al. (2003)
Fraser Lakes (zone B), Wollaston domain, northern Saskatchewan, Canada	1.814	780	0.8	975	HAG	57.044	-104.92	McKechnie et al. (2012); Annesley et al. (2005)
Mafic granulite, Qianxi, Eastern Hebei, North China craton	1.82	815	1.15	709	I	40.327	118.194	Duan et al. (2018; 2015)
Alxa area, northern North China craton	1.822	934	2.37	394	I	40.539	106.108	Wan et al. (2015)
Tiahua metamorphic complex, Mt Huashan area, TNCO, North China Craton	1.823	800	0.77	1039	HAG	34.24	110.46	Wang et al. (2017)
Turku, southern Finland	1.824	830	0.6	1383	HAG	60.461	22.178	Johannes et al. (2003); Väisänen et al. (2002)
Lujiaying, TNCO, North China Craton	1.826	930	0.5	1860	HUHT	40.634	113.844	Yang et al. (2014)
North of Fuping, Fuping Complex, TNCO, North China Craton	1.83	875	1	875	HAG	38.955	114.122	Tang et al. (2017)
Eastern Mahakoshal Belt, Central Indian Tectonic Zone	1.83	520	0.85	612	I	23.352	83.425	Deshmukh et al. (2017)
Eclogite, Kovik tectonic window, Trans-Hudson orogen, Canada	1.83	735	2.5	294	LUHPCE	61.735	-76.704	Weller and St-Onge (2017)
Xiwangshan area, Xuanhua Complex, TNCO, North China Craton	1.835	880	1.15	765	I	40.75	115.005	Huang et al. (2018)
Zanhuang, TNCO, North China Craton	1.839	780	1.15	678	I	37.08	114	Xiao et al. (2014)
Duke of York Bay, Southampton Island, Nunavut	1.848	780	0.71	1099	HAG	65.05	-84.2	Berman et al. (2013b)
Manjinggou, Huai'an Complex, North China Craton	1.848	820	1.48	554	I	40.376	114.47	Wu et al. (2016); Zhao et al. (2008)
Sherdarwaza Formation, Kabul Block, Afghanistan	1.85	860	0.7	1229	HAG	34.584	69.104	Faryad et al. (2015); Collett et al. (2015)
Tasiuyak gneiss, Makhavinekh Lake, northern Labrador, Canada	1.85	900	0.8	1125	HUHT	56.6	-62.35	Mitchell et al. (2014); McFarlane et al. (2005)
Sample 123220, north side of Nordre Stromfjord, Nagssugtoqidian orogen, West Greenland	1.85	975	7	139	LUHPOE	67.791	-53.05	Glassley et al. (2014); Willigers et al. (2001)
Sample 159966, north side of Nordre Stromfjord, Nagssugtoqidian orogen, West Greenland	1.85	985	6.9	143	LUHPOE	67.817	-52.833	Glassley et al. (2014); Willigers et al. (2001)
Eclogite xenoliths, east of Fengzhen, TNCO, North China Craton	1.85	660	2.7	244	LUHPOE	40.48	113.7	Xu et al. (2018)
MP metapelite, Nanshu, Jiaobei massif, Jiao-Liao-Ji belt, North China Craton	1.852	885	0.97	912	HAG	37	120.33	Zhao et al. (2015); Tam et al. (2012c)
Weihai, northern Sulu belt, China	1.854	950	1.2	792	HUHT	37.439	121.997	Xiang et al. (2014)
Garnet websterite, Sharyzhalgai complex, southwestern Siberian craton	1.855	990	2.5	396	I	52.167	102.758	Turkina et al. (2011); Poller et al. (2005); Ota et al. (2004)
Shaerqin, Khondalite Belt, North China Craton	1.86	870	0.8	1088	HAG	40.737	111.171	Jiao et al. (2015)
HP metapelite, Taipingzhuang, Jiaobei massif, Jiao-Liao-Ji belt, North China Craton	1.86	870	1.55	561	I	37.05	120.85	Liu et al. (2014); Tam et al. (2012b)
Mafic enclaves, Pingyang trondhjemite, Fuping terrane, TNCO, North china Craton	1.86	810	1.31	618	I	38.847	114.438	Meng et al. (2017)
Bell Peninsula, Southampton Island, Nunavut	1.861	770	0.74	1041	HAG	63.777	-80.25	Berman et al. (2013b)
Mollendo-Camana Block, Arequipa-Antofalla Basement, central Andean Margin	1.87	1000	1.15	870	HUHT	-16.683	-72.335	Casquet et al. (2010); Martingole and Martelat (2003)
Dashiyu River, North Hengshan, TNCO, North China Craton	1.87	800	1.5	533	I	39.45	113.38	Qian et al. (2017); Zhao et al. (2001)
Kuummiut Terrane, Nagssugtoqidian Orogen, Southeast Greenland	1.87	780	1.8	433	I	65.9277	37.3134	Müller et al. (2018); Nutman et al. (2008)
Eclogite, Ubendian Belt, Tanzania	1.87	700	1.5	467	I	-6.8	30.5	Boniface et al. (2012a)
Mafic granulite, Laiyang, Jiaobei massif, Jiao-Liao-Ji belt, North China Craton	1.87	825	1.4	589	I	37	120.569	Liu et al. (2013); Tam et al. (2012a)
Chipman domain, Snowbird tectonic zone, Canada	1.896	850	1	850	HAG	59.423	-105.413	Mahan et al. (2008); Flowers et al. (2006)
Kuru-Vara quarry, Belomorian province, Russian Federation	1.896	770	1.85	416	I	67.6222	31.4882	Liu et al. (2017)
South Harris, Lewisian Complex, Scotland	1.899	895	1.25	716	I	57.767	-7	Baba et al. (2012); Hollis et al. (2006)
Stolbikha Island, Gridino complex, Belomorian province, Russian Federation	1.902	730	1.9	384	I	65.8795	34.849	Yu et al. (2017)
Eclogite, Athabasca granulite terrane,Snowbird tectonic zone, Canada	1.904	800	1.6	500	I	59.383	-105.968	Baldwin et al. (2004, 2007)
Heling'er, Jining Complex, Khondalite Belt, North China craton	1.91	1000	0.7	1429	HUHT	40.35	111.88	Santosh et al. (2013); Liu et al. (2012)
Lapland granulite belt, Finland	1.91	850	0.8	1063	HAG	68.75	27.88	Tuisku et al. (2006); Tuisku and Huhma (2007)
Umba granulite belt, Russian Federation	1.91	900	1.05	857	HUHT	66.68	33.88	Aranovich et al. (2010); Daly et al. (2001)
Uzkaya-(Shirokaya-)Salma, Belomorian province, Russian Federation	1.911	750	1.8	417	I	67.4717	32.3733	Yu et al. (2018); Li et al. (2018, 2017a, 2017b)
Xiaoshizi, Jining Complex, Khondalite Belt, North China craton	1.915	950	0.91	1044	HUHT	40.84	112.239	Jiao et al. (2013a, 2013b)
Fengshuiling, South Hengshan,TNCO, North China Craton	1.922	800	1.3	615	I	39.3	113.1	Qian and Wei (2016)
Zhaojiayao, Jining Complex, Khondalite Belt, North China craton	1.924	985	0.85	1159	HUHT	40.244	113.23	Li and Wei (2016)
Liangcheng, Jining Complex, Khondalite Belt, North China Craton	1.925	1050	0.6	1750	HUHT	40.549	112.368	Lobjoie et al. (2018)
Uweinat-Kamil basement inlier, east Sahara ghost craton, SW Egypt	1.925	975	0.875	1114	HUHT	22.081	25.857	Karmaker and Schenk (2015a)
Tuguiwula, Jining Complex, Khondalite Belt, North China craton	1.93	1000	0.85	1176	HUHT	40.74	113.3	Li and Wei (2018); Santosh et al. (2009)
Southeastern Luliang complex, TNCO, North China Craton	1.93	825	0.9	917	HAG	37.579	111.924	Zhao et al. (2017); Xiao et al. (2017)
Pingdu-Anqiu area, Jiaobei massif, Jiao-Liao-Ji belt, North China Craton	1.93	775	1.36	570	I	36.82	120	Liu et al. (2017)
Luoning terrane, TNCO, North China Craton	1.94	743	0.925	803	HAG	34.242	111.598	Chen et al. (2015)
Taltson Magmatic Zone, Canada (average 15 samples)	1.94	930	0.67	1388	HUHT	60.03	-111.86	Card et al. (2014); Pattison et al., 2003
Manjinggou, Huai'an, Khondalite Belt, North China Craton	1.946	820	1.45	566	I	40.333	114.567	Wu et al. (2016); Zhao et al. (2010)
Qitan1 borehole, Ordos Basin, North China Craton	1.95	770	0.88	875	HAG	38.919	107.261	Gou et al. (2016)
Qianlishan, Khondalite Belt, North China Craton	1.95	840	1.15	730	I	39.833	106.95	Yin et al. (2014, 2009)
Datong, boundary zone, Jining and Huai'an Complexes, North China craton	1.95	825	1.2	688	I	40.235	113.324	Wu et al. (2017)
Helanshan, Khondalite Belt, North China Craton	1.956	800	1.1	727	I	39.167	106.08	Yin et al. (2015, 2011)
Hujigou, Daqingshan, Khondalite Belt, North China Craton	1.958	860	1.05	819	HAG	40.784	110.08	Cai et al. (2015, 2014); Dong et al. (2013)
Katuma Block, Ubendian Belt, Tanzania	1.96	770	0.71	1085	HAG	-4.667	31.617	Kazimoto et al. (2015, 2014)
Guifengsi, Wutai complex, TNCO, North China Craton	1.96	670	1.15	583	I	39.2958	113.126	Qian and Wei (2016)
Liujiagou, South Hengshan,TNCO, North China Craton	1.964	660	1.2	550	I	39.229	113.129	Qian et al. (2015)
Huangtuyao, Huai'an Complex, TNCO, North China Craton	1.972	885	1.2	738	I	40.57	113.97	Wang et al. (2016)
Glenburgh gold deposit, Glenburgh Terrane, southern Gascoyne Province, Western Australia	1.99	875	0.72	1215	HAG	-25.367	116.152	Roche et al. (2017)
Eclogite, Usagaran Belt, Tanzania	1.999	750	1.8	417	I	-7.13	36.07	Möller et al. (1995); Collins et al. (2004)
Amessmessa, In Ouzzal Terrain, NW Hoggar, Algeria	2	875	0.8	1094	HAG	21	2.45	Ouzegane et al. (1996); Peucat et al. (1996)
In Roccan, In Ouzzal Terrain, NW Hoggar, Algeria	2.002	1000	1	1000	HUHT	23.417	2.833	Ouzegane et al. (2003); Ouzegane and Boumaza (1996); Peucat et al. (1996)
Ihouhaouene, In Ouzzal Terrain, NW Hoggar, Algeria	2.002	1000	0.9	1111	HUHT	23.597	3.212	Aït-Djafer et al. (2009); Peucat et al. (1996);
Khanfous, In Ouzzal Terrain, NW Hoggar, Algeria	2.002	950	0.9	1056	HUHT	22.895	2.8	Adjerid et al. (2013); Peucat et al. (1996)
Kongling complex, Yangtze Block, China	2.009	910	1.4	650	I	30.5	112	Yin et al. (2013)
Beit Bridge Complex, Musina, Central Zone, Limpopo Belt, southern Africa	2.025	820	0.8	1025	HAG	-22.415	30.12	Zeh et al., 2010; Van Reenen et al., 2008; Zeh et al., 2004
Man Rise, Ivory Coast	2.03	850	1.3	654	I	7.247	-7.167	Pitra et al. (2010)
Mahalapye Complex, Central Zone, Limpopo Belt, southern Africa	2.04	800	0.5	1600	HAG	-22.95	26.9	Millonig et al., 2010
Huangtuling granulite, North Dabie complex, China	2.042	950	1.35	704	I	31	115.281	Jian et al. (2012); Chen et al. (2006)
Jequié Block, São Francisco craton, Brazil	2.045	980	0.78	1256	HAG	-13.1	-39.8	Barbosa et al. (2006, 2004)
Metapelite, Cinco Cerros area, southeastern Tandilia belt, Rio de la Plata craton, Argentina	2.07	670	0.67	1000	HAG	-37.73	-58.25	Massonne et al. (2012)
Bakhuis granulite belt, western Suriname	2.072	950	0.85	1118	HUHT	4.753	-56.88	Klaver et al. (2015); de Roever et al. (2003)
Itabuna-Salvador-Curaçá Block, São Francisco craton, Brazil	2.086	925	0.75	1233	HUHT	-11.295	-40	Peucat et al. (2011); Leite et al. (2009)
Eclogite, Nyong complex, Eburnian orogen,	2.09	800	1.9	421	I	3.25	10.5	Loose and Schenk (2018)
0108, El Cristo Hill-San Veran Hill, southeastern Tandilia belt, Rio de la Plata craton, Argentina	2.13	630	0.55	1145	HAG	-37.774	-58.57	Martinez et al. (2017)
Bole-Bulenga domain, NW Ghana	2.138	715	1.1	650	I	8.92	-2.43	Block et al. (2015)
Fada N'Gourma region, Burkina Faso	2.15	425	1.1	386	LHPCB	12.53	0.71	Ganne et al. (2012)
Tidjenouine area, Central Hoggar, Algeria	2.151	860	0.8	1075	HAG	22.15	5.25	Bendaoud et al. (2008)
Southern Boothia Peninsula, northern Rae craton, Canada	2.35	718	0.56	1282	HAG	69.5	-91.15	Berman et al. (2013a)
McCann Lake, southern Rae craton, Canada	2.35	850	0.67	1269	HAG	61.3	-106.6	Berman et al. (2013a)
Terre Adélie, E Antarctica	2.45	800	0.9	889	HAG	-67	144	Duclaux et al. (2008); Ménot et al. (2005)
Shoal Point, S Gawler craton, South Australia	2.455	800	0.65	1231	HAG	-34.776	135.499	Dutch et al., 2010
Mulgathing complex, Christie domain, N Gawler craton, South Australia	2.46	850	0.7	1214	HAG	-30.331	133.537	Halpin and Reid (2016); McFarlane, 2006; Tomkins and Mavrogenes, 2002
Anorthosite, Sittampundi, Tamil Nadu, India	2.461	725	1.1	659	I	11.25	77.967	Chowdhury et al. (2013); Mohan et al. (2013)
Qixia, Jiaodong terrain, Eastern Block, North China craton	2.477	845	1.65	512	I	37.259	120.043	Liu et al. (2015)
Northern Liaoning complex, eastern block, north China craton	2.479	800	0.81	988	HAG	42.25	125	Wu et al. (2013); Wan et al. (2005)
Taipingzhai, Qianxi complex, Eastern Hebei, North China craton	2.48	890	1.25	712	I	40.2362	118.513	Yang et al. (2016)
Jianping Complex, Eastern Block, North China Craton	2.485	800	1.1	727	I	41.5	119.667	Liu et al. (2011); Wei et al. (2001)
Kanjamalai, Salem Block, PCSZ, southern India	2.49	840	1.5	560	I	11.6267	78.05	Anderson et al. (2012)
Taipingzhai, Eastern Hebei, north China craton	2.498	1000	0.95	1053	HUHT	40.239	117.43	Yang and Wei ((2017); Duan et al. (2017); Yang et al. (2008)
Quarry, Louzishan village, Jidong terrane, eastern North China Craton	2.499	850	1.3	654	I	40.225	118.65	Lu et al. (2017)
Charnockite, Madras block, southern India	2.5	860	0.85	1012	HAG	11.41	78	Pattison et al. (2003); Santosh et al. (2003)
Mt Riiser–Larsen, Napier Complex, E Antarctica	2.5	1050	0.8	1313	HUHT	-66.77	50.67	Hokada et al. (2008; 2004; 2003)
Vestfold Hills, E Antarctica	2.5	850	0.81	1049	HAG	-68.65	77.9	Clark et al. (2012); Zulbati & Harley (2007)
Kasai Craton, Zaire (average 6 samples)	2.5	810	0.72	1125	HAG	-7.75	22.5	Pattison et al., 2003
Andriamena Mafic Unit, north-central Madagascar	2.5	1000	1.05	952	HUHT	-17.449	47.517	Goncalves et al. (2004); Paquette et al. (2004)
Linjiaguanzhuang, Yishui terrane, Eastern block, North China craton	2.5	810	0.83	976	HAG	35.701	118.688	Wu et al. (2013, 2012)
Scourie–Achiltibuie (Strathan), Central Region, Lewisian Complex, NW Scotland	2.5	980	1	980	HUHT	58.14	-5.26	Feisel et al. (2018); Crowley et al. (2015)
Xiwulanbulang area, Yinshan Block, North china Craton	2.519	850	1.5	567	I	41.088	110.922	Wang and Guo (2017)
Karnataka, Dharwar Craton, India (average 7 samples)	2.53	840	0.93	903	HAG	12.431	77.208	Pattison et al. (2003); Mojzsis et al. (2003); Friend and Nutman (1992)
Nilgiri Hills, India	2.539	920	1.4	657	I	11.392	76.715	Samuel et al. (2015)
Forefinger Point/Fyfe Hills/Zircon Point, Napier Complex, E Antarctica	2.545	1000	1	1000	HUHT	-67.375	49.226	Kelly and Harley (2005); Harley et al. (1990); Sandiford and Powell (1988)
Mt Charles, Napier Complex, Antarctica	2.545	1100	1.4	786	HUHT	-67.4	50	Mitchell and Harley (2017); Kelly and Harley (2005)
South Kolar greenstone belt, eastern Dharwar craton, India	2.546	600	0.46	1304	HAG	12.286	78.242	Hazarika et al. (2015)
Tonagh Island, Napier Complex, E Antarctica	2.546	1000	0.9	1111	HUHT	-67.13	50.4	Shimizu et al. (2013); Carson et al. (2002)
Chipman domain, Snowbird tectonic zone, Canada	2.55	900	1.3	692	I	59.422	-105.413	Mahan et al. (2008); Flowers et al. (2008)
Majorqaq belt, southern West Greenland	2.56	760	1.15	661	I	65.404	-52.525	Dyck et al. (2015)
Hutti-Maski greenstone belt, eastern Dharwar craton, India	2.564	620	0.6	1033	HAG	16.281	76.781	Hazarika et al. (2015)
Ayyarmalai, northeastern Madurai Province, South India	2.582	800	0.8	1000	HAG	10.891	78.381	Raith et al. (2016)
Felsic granulite, Upper deck domain, Athabasca granulite terrane, Snowbird tectonic zone, Canada	2.6	965	1.5	643	I	59.292	-106.564	Dumond et al. (2015)
Kapuskasing structural zone, Superior Province, Canada (average 4 samples)	2.62	777	1	777	HAG	48.284	-82.683	Bowman et al., 2011; Pattison et al., 2003
Uweinat-Kamil basement inlier, east Sahara ghost craton, SW Egypt	2.622	1050	1	1050	HUHT	22.081	25.857	Karmaker and Schenk (2015a)
Sample EB45, migmatitic orthogneiss, Elu volcanic belt, Canadian Shield	2.632	710	0.67	1060	HAG	67.77	-106.11	Mvondo et al. (2017)
Nevoria, Southern Cross greenstone belt, Yilgarn craton	2.636	590	0.35	1686	HAG	-31.508	119.577	Mueller et al. (2004)
Griffins Find, southwestern Southern Cross Province, Yilgarn craton	2.636	740	0.6	1233	HAG	-33.07	118.312	Barnicoat et al. (1991)
Bulai pluton, Central Zone, Limpopo Belt, southern Africa	2.644	845	0.85	994	HAG	-22.26	29.91	Millonig et al., 2008
Dangin, near Quairading, Grace terrane, Yilgarn craton	2.645	760	0.6	1267	HAG	-32.01	117.31	Wilde (1994); Nemchin et al. (1994); Lindsley (1983)
Quetico Metasedimentary Belt, Superior Province, Canada (average 6 samples)	2.66	880	0.8	1100	HAG	49.334	-85.75	Pattison et al. (2003)
Plutonic gold mine, Marymia Inlier, Western Australia	2.66	590	0.8	738	I	-25.2875	119.45	Vielreicher and McNaughton (2002); Gazley et al. (2011, 2014)
209029, Waroonga shear zone, western Yilgarn craton, Australia	2.66	810	1.21	669	I	-27.97	120.45	Zibra et al. (2017)
Sample 251, Jean Lake, central Quetico metasedimentary belt, Superior Province, Canada	2.667	628	0.64	981	HAG	49.398	-87.845	Valli et al. (2004)
Ashuanipi Complex, Superior Province, Canada (average 10 samples)	2.675	880	0.78	1128	HAG	54.825	-66.817	Pattison et al., 2003
Beartooth Mountains, Montana-Wyoming, USA	2.676	785	0.65	1208	HAG	45.05	-109.424	Guevara et al. (2017); Dragovic et al. (2016)
Varpaisjärvi, central Finland	2.68	850	0.9	944	HAG	63.375	27.755	Höltä and Paavola (2000); Mäntäri and Höltä (2002); Nehring et al. (2009)
Natawahunan Lake, Pikwitonei granulite domain, NW Superior Province, Canada	2.68	900	0.9	1000	HUHT	55.45	-96.67	Kooijman et al. (2012); Heaman et al. (2011); Mezger et al. (1990)
Northern Teton Range, Wyoming, USA	2.697	950	1.2	792	HUHT	45.917	-110.833	Frost et al. (2007, 2009)
Minto block, Superior Province, Canada (average 7 samples)	2.7	840	0.67	1254	HAG	57.32	-74.74	Pattison et al. (2003)
English River Domain, Superior Province, Canada (average 7 samples)	2.7	810	0.65	1246	HAG	50	-93	Pattison et al. (2003)
Scourie–Stoer (Scourie More), Central Region, Lewisian Complex, NW Scotland	2.7	1000	1.4	714	I	58.351	-5.175	Crowley et al. (2015); Cartwright and Barnicoat (1989)
Cnoc an t’Sidhean, NW Scotland	2.7	900	1.45	621	I	58.194	-5.278	Crowley et al. (2015); Zirkler et al. (2012)
Granulite xenolith, Grace kimberlite pipe, South Africa	2.715	1000	1.05	952	HUHT	-27.3	27.1	Dawson et al. (1997); Schmitz and Bowring (2003); Baldwin et al. (2007)
Færingehavn terrane, southern West Greenland	2.715	710	0.98	724	I	63.86	-51.65	Dziggel et al. (2014)
Paradise Basin, Wind River Range, Wyoming, USA	2.718	780	0.95	821	HAG	43.0469	-109.271	Keane et al. (2006); Donohue and Essene (2005)
Southern Marginal Zone, Limpopo Belt, southern Africa	2.72	853	1.1	775	HAG	-23.23	29.92	Nicoli et al. (2015)
Mkhondo Valley metamorphic suite, Ancient Gneiss Complex, Swaziland	2.73	838	0.5	1676	HAG	-26.867	31.295	Taylor et al. (2010)
Sermilik, Lower zone, Sermilik block, Tasiusarsuaq terrane, southern West Greenland	2.74	830	1.05	790	HAG	63.53	-50.97	Dziggel et al. (2017)
Helge Halvo, Skjoldungen, SE Greenland	2.742	760	0.8	950	HAG	62.216	-41.144	Tusch et al. (2015); Berger et al. (2014)
Tre Brødre terrane, southern West Greenland	2.751	640	0.6	1067	HAG	63.94	-51.29	Dzieggel et al. (2014)
512073, Lower zone, Bjornesund block, Tasiusarsuaq terrane, southern West Greenland	2.76	915	1.05	871	HUHT	63.29	-50.91	Dziggel et al. (2017)
515190/515183, Lower zone, Sermilik block, Tasiusarsuaq terrane, southern West Greenland	2.805	865	0.81	1068	HAG	63.615	-50.8969	Dziggel et al (2012); Crowley (2002)
BIF, Voronezh Crystalline Massif, Volgo-Uralia	2.819	900	1	900	HUHT	51.76	35.38	Savko et al. (2010); Fonarev et al. (2006)
Finlayson Lake greenstone belt, Superior Province, Canada	2.92	600	0.82	732	I	48.893	-91.618	Backeberg et al. (2014)
La France Formation, Murchison Greenstone Belt, South Africa	2.923	655	0.81	809	HAG	-24.94	30.7	Block et al. (2013)
Kubuta granulites, Ancient Gneiss Complex, Swaziland	3.07	853	0.71	1201	HAG	-26.8	31.4	Taylor et al. (2012); Suhr et al. (2015)
Tjakastad schist belt, Barberton Greenstone Belt	3.23	590	0.85	694	I	-26.007	30.827	Cutts et al. (2014); Diener et al. (2005, 2006); Dziggel et al. (2005)
Inyoni shear zone, Barberton Greenstone Belt	3.238	650	1.3	500	I	-25.995	30.718	Diener et al. (2006); Moyen et al. (2006); Van Kranendonk et al. (2014)
Metasedimentary enclave, Mount Edgar dome, East Pilbara	3.312	700	0.7	1000	HAG	-21.19	120.13	François et al. (2014)
Zone C/D, northeastern Isua Supracrustal Belt, southwest Greenland	3.56	620	0.8	775	I	65.167	-49.833	Arai et al. (2015); Nutman et al. (2002)
Locality G11/24, northern terrane, Isua, southwest Greenland	3.658	870	1.25	696	I	65.1515	-50.0603	Authors P-T estimate (unpubl.); Nutman et al. (2015, 2013)
Islands south of Nuuk, southwest Greenland	3.669	860	0.8	1075	HAG	63.857	-51.66	Authors P-T estimate (unpubl.); Horie et al. (2010)

## Sheet: Suppl. Fig. 5
Age (Ma)	Total alkalis	2 s.e.m.	n	SiO2 (wt%)	2 s.e.m.	n
1000	3.77	0.9439	7	49.97	1.3114	5
950	3.6275	0.76035	8	50.48	1.019	6
900	3.081	0.70508	10	49.83	0.92659	9
850	3.4229	0.63287	17	49.3	0.87341	13
800	3.3233	0.77225	12	48.623	0.83514	8
750	3.3757	0.66359	14	48.208	0.95069	10
700	4.5557	0.43694	13	50.281	1.9007	10
650	4.7681	0.31721	19	51.745	1.0318	17
600	4.6618	0.32755	25	51.376	0.90745	21
550	4.9558	0.26033	63	50.796	0.59858	56
500	4.918	0.21151	84	50.578	0.52061	75
450	4.8911	0.23822	81	50.529	0.56798	69
400	4.9504	0.15713	140	50.792	0.41649	121
350	4.6421	0.1376	207	50.071	0.35192	175
300	4.8158	0.13801	261	50.052	0.29139	225
250	4.8818	0.12701	330	49.913	0.25596	284
200	5.0999	0.10016	521	50.186	0.20834	452
150	5.2691	0.096435	626	49.926	0.20154	542
100	5.3201	0.024142	7030	48.864	0.052359	6183
50	5.3234	0.024251	6956	48.855	0.052594	6125
0	5.3199	0.024691	6721	48.79	0.052666	5921

## Sheet: Suppl. Fig 7
Age (Ma)	Nb/Th	2 s.e.m.	n	Nb/Rb	2 s.e.m.	n
1000	3.6264	2.6926	6	0.31653	0.15396	6
950	3.8	1.8698	9	0.36785	0.21561	9
900	3.1769	1.2272	11	0.61145	0.38212	11
850	3.1769	1.2272	11	0.61145	0.38212	11
800	3.1769	1.2272	11	0.61145	0.38212	11
750	3.835	1.3994	8	0.59365	0.42768	10
700	3.7654	1.526	12	0.63365	0.29348	21
650	3.4383	1.8018	10	0.73	0.32773	18
600	3.9522	2.0629	13	0.41179	0.15489	35
550	4.1299	1.465	22	0.6322	0.19945	44
500	4.7536	1.6685	24	0.77236	0.28221	46
450	4.3376	1.4362	27	0.7823	0.27635	42
400	2.8973	0.64784	50	0.62979	0.15444	70
350	3.756	0.51017	106	0.70558	0.10765	127
300	3.4609	0.45547	122	0.6535	0.09366	154
250	3.8857	0.43703	151	0.74248	0.095539	192
200	3.5527	0.31176	276	0.68236	0.076159	318
150	4.4336	0.43568	316	0.95461	0.10392	359
100	4.5747	0.47015	285	0.9996	0.11635	320
50	4.4796	0.51557	250	0.98877	0.12861	274
0	6.0058	0.13416	2831	1.1109	0.022182	3909
