# Supplementary material for: Continental basalts track secular cooling of the mantle and the onset of modern plate tectonics
Source: Research Square preprint supplement (doi:10.21203/rs.3.rs-436896/v1), 2021-04-22
Supplement: Supplementary file 3 [file add7bfcfb0b533fa973bd90d.xlsx]

## Sheet: Georoc_continent
SAMPLE_ID	SOURCE	REFERENCE	LATITUDE	LONGITUDE	MATERIAL	TYPE_	ROCK_NAME	AGE	age_uncertain	SIO2	TIO2	AL2O3	FE2O3	FE2O3T	FEO	FEOT	MNO	MGO	CAO	NA2O	K2O	P2O5	LOI	LA	CE	PR	ND	SM	EU	GD	TB	DY	HO	ER	TM	YB	LU	SC	V_	CR	CO	NI	ZN	CU	ZR	GA	BA	TA	U_
SP21A	GEOROC	WILSON, A. H.; VERSFELD, J. A.; HUNTER, D. R., 1989	-28	30.75	IGNEOUS	VOLCANIC	BASALT	3200	0	49.98	0.72	7.47				12.01	0.23	17.87	11.09	0.41	0.02	0.06	2.47															33	235	1560		193			54.4
SP27A	GEOROC	WILSON, A. H.; VERSFELD, J. A.; HUNTER, D. R., 1989	-28	30.75	IGNEOUS	VOLCANIC	BASALT	3200	0	50.07	0.7	7.65				12.89	0.21	17.05	10.78	0.61	0.05	0.06	2.5															33.4	225	1386		190			53.4
SP29A	GEOROC	WILSON, A. H.; VERSFELD, J. A.; HUNTER, D. R., 1989	-28	30.75	IGNEOUS	VOLCANIC	BASALT	3200	0	50.19	0.66	6.89				12.29	0.17	18.65	10.37	0.52	0.05	0.06	2.47															31.3	208	4732		892			47.4
SP31A	GEOROC	WILSON, A. H.; VERSFELD, J. A.; HUNTER, D. R., 1989	-28	30.75	IGNEOUS	VOLCANIC	BASALT	3200	0	49.86	0.7	7.71				12.3	0.23	17.24	11.2	0.78	0.05	0.08	2.36															33.4	223	2065		302			54
SP85/10	GEOROC	WILSON, A. H.; VERSFELD, J. A.; HUNTER, D. R., 1989	-28	30.75	IGNEOUS	VOLCANIC	BASALT	3200	0	50.27	0.57	6.86				11.22	0.22	19.63	10.68	0.39	0.05	0.05	2.77															27.4	190	2865		744			48.1
SP85/12	GEOROC	WILSON, A. H.; VERSFELD, J. A.; HUNTER, D. R., 1989	-28	30.75	IGNEOUS	VOLCANIC	BASALT	3200	0	50.53	0.65	6.41				11.74	0.24	20.04	10.12	0.01	0.03	0.05	2.86															31.1	204	2343		620			51.6
SP85/13	GEOROC	WILSON, A. H.; VERSFELD, J. A.; HUNTER, D. R., 1989	-28	30.75	IGNEOUS	VOLCANIC	BASALT	3200	0	50.61	0.52	6.3				11.29	0.2	21.11	9.28	0.16	0.04	0.05	3.25															27.7	180	2648		1127			46.6
SP85/18	GEOROC	WILSON, A. H.; VERSFELD, J. A.; HUNTER, D. R., 1989	-28	30.75	IGNEOUS	VOLCANIC	BASALT	3200	0	50.88	0.55	6.34				11.19	0.21	19.36	10.59	0.08	0.03	0.05	2.4															26.3	175	2741		928			46.9
SP85/21	GEOROC	WILSON, A. H.; VERSFELD, J. A.; HUNTER, D. R., 1989	-28	30.75	IGNEOUS	VOLCANIC	BASALT	3200	0	50.69	0.7	8.09				12	0.22	16.39	10.97	0.96	0.22	0.06	1.59															35.2	218	1748		261			56.6
SP85/6	GEOROC	WILSON, A. H.; VERSFELD, J. A.; HUNTER, D. R., 1989	-28	30.75	IGNEOUS	VOLCANIC	BASALT	3200	0	52.66	0.68	6.51				10.95	0.24	17.43	11.78	0.52	0.11	0.05	1.51															29.9	182	2212		444			50.4
SP85/7	GEOROC	WILSON, A. H.; VERSFELD, J. A.; HUNTER, D. R., 1989	-28	30.75	IGNEOUS	VOLCANIC	BASALT	3200	0	50.34	0.62	7.37				11.93	0.24	17.88	10.9	0.51	0.06	0.05	2.2															30.9	191	2040		426			51.8
174438	GEOROC	SMITHIES, R. H.; CHAMPION, D. C.; SUN, SHEN-SU, 2004	-21	117	IGNEOUS	VOLCANIC	BONINITE	3120	0	47.31	0.29	16.77		10.33			0.2	9.95	7.91	1.38	1.22	0.05	5.38	1.39	3.74	0.5	2.18	0.63	0.27	0.6	0.1	0.64	0.14	0.46		0.6	0.1	42	125	259		99			11		160
174440	GEOROC	SMITHIES, R. H.; CHAMPION, D. C.; SUN, SHEN-SU, 2004	-21	117	IGNEOUS	VOLCANIC	BONINITE	3120	0	50.91	0.31	16.53		10.65			0.19	8.8	6.8	1.91	0.86	0.06	3.79	3.82	9.56	1.21	5.14	1.22	0.35	1.28	0.25	1.51	0.33	1.07		1.27	0.2	49	133	89		71			33		106		0.16
174441	GEOROC	SMITHIES, R. H.; CHAMPION, D. C.; SUN, SHEN-SU, 2004	-21	117	IGNEOUS	VOLCANIC	BONINITE	3120	0	50.92	0.37	16		10.69			0.15	9.36	6.95	2.01	0.23	0.06	4.09	3.2	7.92	1.03	4.35	1.24	0.41	1.37	0.24	1.52	0.34	1.07		1.23	0.2	42	133	188		79			27		36		0.15
174453	GEOROC	SMITHIES, R. H.; CHAMPION, D. C.; SUN, SHEN-SU, 2004	-21	117	IGNEOUS	VOLCANIC	BONINITE	3120	0	49.78	0.29	16.68		9.77			0.21	9.12	8.41	1.07	0.02	0.05	5.3	2.18	4.39	0.58	2.62	0.58	0.24	0.69	0.11	0.79	0.18	0.61		0.78	0.13	43	131	164		81			16		30
174456	GEOROC	SMITHIES, R. H.; CHAMPION, D. C.; SUN, SHEN-SU, 2004	-21	117	IGNEOUS	VOLCANIC	BONINITE	3120	0	53.25	0.47	16.35		10.11			0.2	8.13	8.43	1.5	0.19	0.08	2.01	5.89	14.38	1.85	7.72	1.88	0.51	1.95	0.34	2.15	0.48	1.44		1.63	0.24	47	144	158		68			53		48		0.24
180232	GEOROC	SMITHIES, R. H.; CHAMPION, D. C.; SUN, SHEN-SU, 2004	-21	117	IGNEOUS	VOLCANIC	BONINITE	3120	0	49.34	0.31	17.01		10.44			0.22	8.32	6.87	1.3	1.02	0.06	5.92	1.32	2.99	0.43	1.92	0.52	0.25	0.61	0.09	0.77	0.18	0.57		0.77	0.16	51	162	190		81			13		106		0.05
174438	GEOROC	SMITHIES, R. H.; CHAMPION, D. C.; VAN KRANENDONK, M. J.; HOWARD, H. M.; HICKMAN, A. H., 2005	-21	117	IGNEOUS	VOLCANIC	BONINITE	3120	0	47.31	0.29	16.77		10.33			0.2	9.95	7.91	1.38	1.22	0.05	5.38	1.39	3.74	0.5	1.93	0.47	0.27	0.6	0.1	0.64	0.14	0.46		0.6	0.1	42	125	259		99	87	18	3	9	160
174440	GEOROC	SMITHIES, R. H.; CHAMPION, D. C.; VAN KRANENDONK, M. J.; HOWARD, H. M.; HICKMAN, A. H., 2005	-21	117	IGNEOUS	VOLCANIC	BONINITE	3120	0	50.91	0.31	16.53		10.65			0.19	8.8	6.8	1.91	0.86	0.06	3.79	3.82	9.56	1.21	5.14	1.22	0.35	1.28	0.25	1.51	0.33	1.07		1.27	0.2	49	133	89		71	70	34	33	10	106	0.1	0.16
174441	GEOROC	SMITHIES, R. H.; CHAMPION, D. C.; VAN KRANENDONK, M. J.; HOWARD, H. M.; HICKMAN, A. H., 2005	-21	117	IGNEOUS	VOLCANIC	BONINITE	3120	0	50.92	0.37	16		10.69			0.15	9.36	6.95	2.01	0.23	0.06	4.09	3.2	7.92	1.03	4.35	1.24	0.41	1.37	0.24	1.52	0.34	1.07		1.23	0.2	42	133	188		79	63	8	27	9	36	0.1	0.15
174442	GEOROC	SMITHIES, R. H.; CHAMPION, D. C.; VAN KRANENDONK, M. J.; HOWARD, H. M.; HICKMAN, A. H., 2005	-21	117	IGNEOUS	VOLCANIC	ANDESITE	3120	0	54.12	0.41	16.02		9.2			0.17	8.12	6.66	1.85	0.29	0.08	3.77	9.28	23.37	2.88	12.06	2.92	0.65	3.06	0.55	3.34	0.75	2.36		2.51	0.39	39	112	158		65	67	15	96	12	55	0.3	0.45
174446	GEOROC	SMITHIES, R. H.; CHAMPION, D. C.; VAN KRANENDONK, M. J.; HOWARD, H. M.; HICKMAN, A. H., 2005	-21	117	IGNEOUS	VOLCANIC	BASALT	3120	0	52.09	0.83	15.64		12.51			0.22	6.76	7.68	2.04	0.23	0.15	2.74	7.22	18.41	2.42	10.39	2.85	0.81	2.84	0.52	3.14	0.7	2.21		2.34	0.37	50	212	34		64	89	79	73	13	56	0.3	0.23
174449	GEOROC	SMITHIES, R. H.; CHAMPION, D. C.; VAN KRANENDONK, M. J.; HOWARD, H. M.; HICKMAN, A. H., 2005	-21	117	IGNEOUS	VOLCANIC	BASALT	3120	0	48.47	0.64	15.01		6.76			0.11	3.37	10.96	0.38	3.04	0.12	11.59	7.69	18.7	2.4	9.93	2.38	0.55	2.29	0.4	2.26	0.49	1.48		1.45	0.22	31	177	188		81	105	15	80	14	367	0.2	0.35
174451	GEOROC	SMITHIES, R. H.; CHAMPION, D. C.; VAN KRANENDONK, M. J.; HOWARD, H. M.; HICKMAN, A. H., 2005	-21	117	IGNEOUS	VOLCANIC	THOLEIITE	3120	0	49.54	1.42	12.97		13.22			0.21	5.78	10.53	1.84	0.13	0.17	5.05	7.21	20.02	2.97	13.96	4.2	1.36	5.37	0.98	6.01	1.27	3.75		3.58	0.52	38	292	99		61	100	131	119	20	66	0.3	0.22
174453	GEOROC	SMITHIES, R. H.; CHAMPION, D. C.; VAN KRANENDONK, M. J.; HOWARD, H. M.; HICKMAN, A. H., 2005	-21	117	IGNEOUS	VOLCANIC	BONINITE	3120	0	49.78	0.29	16.68		9.77			0.21	9.12	8.41	1.07	0.02	0.05	5.3	2.18	4.39	0.58	2.62	0.58	0.24	0.69	0.11	0.79	0.18	0.61		0.78	0.13	43	131	164		81	70	31	9	9	30
174454	GEOROC	SMITHIES, R. H.; CHAMPION, D. C.; VAN KRANENDONK, M. J.; HOWARD, H. M.; HICKMAN, A. H., 2005	-21	117	IGNEOUS	VOLCANIC	THOLEIITE	3120	0	46.91	1.45	12.68		14.09			0.22	5.19	8.44	1.64	0.19	0.15	10.19	5.46	15.46	2.35	10.83	3.45	1.27	5.13	0.96	6	1.34	3.99		3.83	0.55	40	359	112		69	112	122	105	18	43	0.3	0.16
174455	GEOROC	SMITHIES, R. H.; CHAMPION, D. C.; VAN KRANENDONK, M. J.; HOWARD, H. M.; HICKMAN, A. H., 2005	-21	117	IGNEOUS	VOLCANIC	THOLEIITE	3120	0	50.83	1.58	13.61		14.68			0.19	6.04	8.47	2.04	0.05	0.17	3.16	6.27	17.85	2.66	13.36	4.38	1.46	5.6	1.04	6.18	1.37	4.14		3.95	0.59	39	332	123		70	111	102	114	19	37	0.3	0.17
174456	GEOROC	SMITHIES, R. H.; CHAMPION, D. C.; VAN KRANENDONK, M. J.; HOWARD, H. M.; HICKMAN, A. H., 2005	-21	117	IGNEOUS	VOLCANIC	BONINITE	3120	0	53.25	0.47	16.35		10.11			0.2	8.13	8.43	1.5	0.19	0.08	2.01	5.89	14.38	1.85	7.72	1.88	0.51	1.95	0.34	2.15	0.48	1.44		1.63	0.24	47	144	158		68	67	44	53	11	48	0.2	0.24
174458	GEOROC	SMITHIES, R. H.; CHAMPION, D. C.; VAN KRANENDONK, M. J.; HOWARD, H. M.; HICKMAN, A. H., 2005	-21	117	IGNEOUS	VOLCANIC	THOLEIITE	3120	0	51.38	1.42	12.68		13.92			0.21	4.74	11.48	1.42	0.07	0.15	3.31	5.78	15.92	2.45	11.91	3.98	1.29	5.22	0.97	5.87	1.29	3.86		3.7	0.55	39	325	106		80	104	163	104	21	39	0.3	0.16
174459	GEOROC	SMITHIES, R. H.; CHAMPION, D. C.; VAN KRANENDONK, M. J.; HOWARD, H. M.; HICKMAN, A. H., 2005	-21	117	IGNEOUS	VOLCANIC	THOLEIITE	3120	0	48.03	1.43	12.44		13.3			0.19	6.39	8.66	1.87	0.04	0.14	8.52	5.19	14.71	2.28	11.17	3.84	1	4.62	0.89	5.38	1.18	3.55		3.5	0.52	40	349	120		74	96	148	96	17	92	0.2	0.15
174465	GEOROC	SMITHIES, R. H.; CHAMPION, D. C.; VAN KRANENDONK, M. J.; HOWARD, H. M.; HICKMAN, A. H., 2005	-21	117	IGNEOUS	VOLCANIC	THOLEIITE	3120	0	48.47	1.49	14.04		14.48			0.2	5.54	9.85	3.16	0.12	0.15	3.41	6.36	16.16	2.46	12.37	3.99	1.38	5.25	1.02	6.09	1.33	4.01		3.91	0.57	41	327	124		81	104	133	107	21	110	0.3	0.15
174466	GEOROC	SMITHIES, R. H.; CHAMPION, D. C.; VAN KRANENDONK, M. J.; HOWARD, H. M.; HICKMAN, A. H., 2005	-21	117	IGNEOUS	VOLCANIC	THOLEIITE	3120	0	47.91	1.57	13.98		14.23			0.2	6.06	9.55	2.38	0.32	0.17	4.37	6.09	17.25	2.63	13.13	4.25	1.41	5.44	1.02	6.37	1.4	4.11		3.96	0.59	38	332	147		88	108	92	118	19	278	0.3	0.17
174467	GEOROC	SMITHIES, R. H.; CHAMPION, D. C.; VAN KRANENDONK, M. J.; HOWARD, H. M.; HICKMAN, A. H., 2005	-21	117	IGNEOUS	VOLCANIC	THOLEIITE	3120	0	48.4	1.59	13.55		14.91			0.2	6.09	10.12	2	0.24	0.17	3.54	6.25	17.69	2.72	13.4	4.32	1.48	5.72	1.06	6.55	1.43	4.29		4.28	0.6	40	348	139		79	110	107	119	20	419	0.3	0.18
174468	GEOROC	SMITHIES, R. H.; CHAMPION, D. C.; VAN KRANENDONK, M. J.; HOWARD, H. M.; HICKMAN, A. H., 2005	-21	117	IGNEOUS	VOLCANIC	BASALT	3120	0	48.97	0.74	15.23		11.53			0.21	6.68	6.9	1.62	0.67	0.13	8.1	6.77	16.59	2.25	9.62	2.41	0.75	2.6	0.47	2.94	0.65	2.11		2.28	0.37	42	211	37		66	94	62	65	12	494	0.2	0.21
174469	GEOROC	SMITHIES, R. H.; CHAMPION, D. C.; VAN KRANENDONK, M. J.; HOWARD, H. M.; HICKMAN, A. H., 2005	-21	117	IGNEOUS	VOLCANIC	BASALT	3120	0	49.8	0.74	15.03		12.27			0.21	6.74	7.24	1.49	0.5	0.13	6.72	6.09	15.24	2.11	9.07	2.15	0.71	2.39	0.43	2.72	0.6	1.87		2.06	0.32	50	202	40		65	90	64	60	12	204	0.2	0.18
174470	GEOROC	SMITHIES, R. H.; CHAMPION, D. C.; VAN KRANENDONK, M. J.; HOWARD, H. M.; HICKMAN, A. H., 2005	-21	117	IGNEOUS	VOLCANIC	THOLEIITE	3120	0	47.82	1.07	13.91		12.66			0.23	5.94	11.87	2.33	0.1	0.11	4.87	4.54	12.72	1.87	9.05	2.95	0.95	3.63	0.66	4	0.86	2.55		2.41	0.35	37	254	100		84	94	116	72	17	57	0.2	0.13
174471	GEOROC	SMITHIES, R. H.; CHAMPION, D. C.; VAN KRANENDONK, M. J.; HOWARD, H. M.; HICKMAN, A. H., 2005	-21	117	IGNEOUS	VOLCANIC	THOLEIITE	3120	0	47.76	1.22	13.57		12.48			0.19	5.88	10.22	2.95	0.27	0.14	6.07	6.83	17.39	2.58	12.43	4.1	1.25	4.94	0.94	5.61	1.2	3.45		3.4	0.49	34	277	65		78	95	109	101	18	302	0.3	0.2
174472	GEOROC	SMITHIES, R. H.; CHAMPION, D. C.; VAN KRANENDONK, M. J.; HOWARD, H. M.; HICKMAN, A. H., 2005	-21	117	IGNEOUS	VOLCANIC	BASALT	3120	0	53.49	0.76	14.05		6.68			0.11	4.53	7.6	2.11	1.9	0.17	9.07	19.18	42.4	4.98	18.44	3.9	1.01	3.53	0.62	3.48	0.77	2.25		2.2	0.32	21	156	148		104	74	7	150	16	355	0.4	0.86
174473	GEOROC	SMITHIES, R. H.; CHAMPION, D. C.; VAN KRANENDONK, M. J.; HOWARD, H. M.; HICKMAN, A. H., 2005	-21	117	IGNEOUS	VOLCANIC	THOLEIITE	3120	0	49.76	1.37	14.11		13.81			0.21	6.6	9.92	1.94	0.73	0.17	2.25	6.96	17.35	2.61	12.66	4.22	1.32	5	0.93	5.53	1.19	3.48		3.39	0.47	33	269	121		102	97	112	108	19	315	0.3	0.18
174474	GEOROC	SMITHIES, R. H.; CHAMPION, D. C.; VAN KRANENDONK, M. J.; HOWARD, H. M.; HICKMAN, A. H., 2005	-21	117	IGNEOUS	VOLCANIC	THOLEIITE	3120	0	48.56	1.06	13.76		13.33			0.22	6.3	8.73	2.81	0.52	0.11	5.49	4.64	12.7	1.93	9.3	3.02	0.97	3.69	0.65	4	0.85	2.54		2.49	0.35	32	253	89		81	87	117	71	17	225	0.2	0.13
174482	GEOROC	SMITHIES, R. H.; CHAMPION, D. C.; VAN KRANENDONK, M. J.; HOWARD, H. M.; HICKMAN, A. H., 2005	-21	117	IGNEOUS	VOLCANIC	BASALT	3120	0	50.51	1.22	13.72		12.96			0.19	7.32	8.44	1.29	0.24	0.21	4.73	7.24	19.09	2.63	11.93	3.47	1.04	3.52	0.62	3.72	0.81	2.39		2.45	0.37	44	255	161		40	103	98	85	13	77	0.3	0.18
174484	GEOROC	SMITHIES, R. H.; CHAMPION, D. C.; VAN KRANENDONK, M. J.; HOWARD, H. M.; HICKMAN, A. H., 2005	-21	117	IGNEOUS	VOLCANIC	BASALT	3120	0	50.85	0.62	19.25		7.3			0.13	5.19	7.66	2.56	2.38	0.14	4.33	8.47	20.23	2.55	10.35	2.54	0.79	2.3	0.4	2.29	0.47	1.42		1.36	0.21	22	147	124		76	64	52	77	16	591	0.2	0.27
174485	GEOROC	SMITHIES, R. H.; CHAMPION, D. C.; VAN KRANENDONK, M. J.; HOWARD, H. M.; HICKMAN, A. H., 2005	-21	117	IGNEOUS	VOLCANIC	BASALT	3120	0	53.83	0.86	16.18		8.62			0.16	4.4	7.77	2.98	1.29	0.2	4.18	11.96	28.9	3.62	14.67	3.66	1.04	3.37	0.54	3.15	0.69	2.02		1.93	0.3	33	187	138		43	74	88	114	16	483	0.3	0.39
174488	GEOROC	SMITHIES, R. H.; CHAMPION, D. C.; VAN KRANENDONK, M. J.; HOWARD, H. M.; HICKMAN, A. H., 2005	-21	117	IGNEOUS	VOLCANIC	BASALT	3120	0	53.62	1.04	15.41		9.24			0.14	5.27	6.41	2.6	1.87	0.2	4.73	10.73	25.98	3.35	14.23	3.4	1.08	3.62	0.6	3.4	0.73	2.1		2.04	0.32	30	195	124		42	80	59	114	16	460	0.4	0.43
174489	GEOROC	SMITHIES, R. H.; CHAMPION, D. C.; VAN KRANENDONK, M. J.; HOWARD, H. M.; HICKMAN, A. H., 2005	-21	117	IGNEOUS	VOLCANIC	ANDESITE	3120	0	54.16	1.05	15.16		9.29			0.16	5.2	8.16	3.03	1.07	0.2	3.09	9.83	23.47	3	12.53	2.93	0.97	3.2	0.52	3.17	0.66	1.95		1.86	0.28	30	193	116		39	80	59	102	15	282	0.3	0.38
174493	GEOROC	SMITHIES, R. H.; CHAMPION, D. C.; VAN KRANENDONK, M. J.; HOWARD, H. M.; HICKMAN, A. H., 2005	-21	117	IGNEOUS	VOLCANIC	BASALT	3120	0	53.96	1.12	15.25		9.69			0.15	5.27	7.48	2.77	0.77	0.22	3.86	11	26.68	3.37	14.54	3.63	1.13	3.71	0.6	3.64	0.77	2.2		2.18	0.33	33	205	99		39	78	61	114	16	232	0.4	0.43
174494	GEOROC	SMITHIES, R. H.; CHAMPION, D. C.; VAN KRANENDONK, M. J.; HOWARD, H. M.; HICKMAN, A. H., 2005	-21	117	IGNEOUS	VOLCANIC	BASALT	3120	0	49.98	0.89	16.29		9.02			0.15	7.54	8.93	1.92	0.23	0.16	5.47	7.5	19.04	2.56	11.31	2.78	0.9	2.92	0.47	2.85	0.58	1.69		1.59	0.25	28	151	278		167	77	47	86	14	92	0.4	0.32
174499	GEOROC	SMITHIES, R. H.; CHAMPION, D. C.; VAN KRANENDONK, M. J.; HOWARD, H. M.; HICKMAN, A. H., 2005	-21	117	IGNEOUS	VOLCANIC	BASALT	3120	0	53.08	0.77	16.65		8.81			0.14	6.14	6.78	2.55	1.6	0.17	3.78	10.24	23.01	2.79	11.53	2.63	0.87	2.8	0.47	2.71	0.55	1.67		1.66	0.26	24	161	185		96	77	58	91	16	590	0.3	0.37
176701	GEOROC	SMITHIES, R. H.; CHAMPION, D. C.; VAN KRANENDONK, M. J.; HOWARD, H. M.; HICKMAN, A. H., 2005	-21	117	IGNEOUS	VOLCANIC	BASALT	3120	0	51.71	1.34	15.98		10.55			0.16	5.33	8.06	2.28	1.47	0.34	3.39	14.17	36.68	4.96	21.09	4.91	1.52	4.93	0.81	4.52	0.92	2.78		2.6	0.39	27	206	144		57	92	54	144	17	570	0.5	0.35
176702	GEOROC	SMITHIES, R. H.; CHAMPION, D. C.; VAN KRANENDONK, M. J.; HOWARD, H. M.; HICKMAN, A. H., 2005	-21	117	IGNEOUS	VOLCANIC	BASALT	3120	0	48.8	2	14.69		13.82			0.17	5.43	4.24	1.99	3.05	0.45	5.1	15.48	42.55	6.09	27.37	6.67	2.06	6.76	1.09	5.98	1.22	3.57		3.4	0.47	34	302	67		24	129	81	162	19	939	0.6	0.28
180227	GEOROC	SMITHIES, R. H.; CHAMPION, D. C.; VAN KRANENDONK, M. J.; HOWARD, H. M.; HICKMAN, A. H., 2005	-21	117	IGNEOUS	VOLCANIC	BASALT	3120	0	53.94	1.14	16.11		9.13			0.18	3.7	9.95	2.39	0.44	0.23	3.36	18.64	38.29	5.22	21.68	5.58	1.43	5.63	0.89	6.65	1.44	4.22		4.08	0.69	30	188	131		51	90	22	185	18	79	0.5	0.61
180228	GEOROC	SMITHIES, R. H.; CHAMPION, D. C.; VAN KRANENDONK, M. J.; HOWARD, H. M.; HICKMAN, A. H., 2005	-21	117	IGNEOUS	VOLCANIC	BASALT	3120	0	49.15	0.81	16.74		10.55			0.16	6.18	7.23	2.49	0.71	0.16	6.55	9.32	19.72	2.72	11.58	2.77	0.87	2.51	0.39	2.59	0.57	1.66		1.64	0.3	32	203	222		114	82	29	75	14	212	0.2	0.26
180229	GEOROC	SMITHIES, R. H.; CHAMPION, D. C.; VAN KRANENDONK, M. J.; HOWARD, H. M.; HICKMAN, A. H., 2005	-21	117	IGNEOUS	VOLCANIC	BASALT	3120	0	52.6	1.46	14.74		10.4			0.22	4.43	8.97	2.55	0.65	0.32	4.12	15.11	32.89	4.72	20.06	4.69	1.34	5.29	0.76	5.39	1.12	3.32		3.32	0.58	39	272	65		29	98	56	164	17	120	0.5	0.42
180230	GEOROC	SMITHIES, R. H.; CHAMPION, D. C.; VAN KRANENDONK, M. J.; HOWARD, H. M.; HICKMAN, A. H., 2005	-21	117	IGNEOUS	VOLCANIC	BASALT	3120	0	52.76	1.42	16.9		8.39			0.15	4.07	9.86	2.54	1.16	0.2	2.72	6.89	16.32	2.53	11.53	3.48	1.05	3.9	0.62	4.37	0.92	2.62		2.51	0.44	35	267	263		93	88	51	94	17	266	0.3	0.27
180231	GEOROC	SMITHIES, R. H.; CHAMPION, D. C.; VAN KRANENDONK, M. J.; HOWARD, H. M.; HICKMAN, A. H., 2005	-21	117	IGNEOUS	VOLCANIC	BASALT	3120	0	47.7	0.77	16.3		11.85			0.2	7.33	9.67	1.42	0.35	0.13	4.93	6.82	15.76	2.3	10.21	2.4	0.81	2.28	0.33	2.41	0.56	1.71		1.86	0.35	46	208	125		170	58	92	56	13	34	0.2	0.1
180232	GEOROC	SMITHIES, R. H.; CHAMPION, D. C.; VAN KRANENDONK, M. J.; HOWARD, H. M.; HICKMAN, A. H., 2005	-21	117	IGNEOUS	VOLCANIC	BONINITE	3120	0	49.34	0.31	17.01		10.44			0.22	8.32	6.87	1.3	1.02	0.06	5.92	1.32	2.99	0.43	1.94	0.49	0.25	0.61	0.09	0.77	0.18	0.57		0.77	0.16	51	162	190		81	68	31	13	9	106		0.05
2019-01-01	GEOROC	NESBITT, H. W.; YOUNG, G. M.; BOSMAN, S. A., 2009	52.4	-92.75	IGNEOUS	VOLCANIC	BASALT	3100	0	49.28	1.77	13.1				15.24	0.23	5.57	9.69	1.22	0.34	0.14	0.48	10.9	25.9	3.49	16.1	4.46	1.51	4.56	0.8	4.85	0.95	2.8	0.4	2.27	0.33		348	75	52	89	191	210	110		63	0.38	0.2
2019-01-02	GEOROC	NESBITT, H. W.; YOUNG, G. M.; BOSMAN, S. A., 2009	52.4	-92.75	IGNEOUS	VOLCANIC	BASALT	3100	0	49.87	0.58	12.88				9.54	0.19	8.98	9.4	1.11	0.12	0.05	5.51	1.74	4.61	0.73	3.84	1.36	0.57	1.98	0.37	2.4	0.52	1.62	0.24	1.49	0.22		226	477	42	102	108	97	31		30	0.01	0.06
2019-01-03	GEOROC	NESBITT, H. W.; YOUNG, G. M.; BOSMAN, S. A., 2009	52.4	-92.75	IGNEOUS	VOLCANIC	BASALT	3100	0	52.35	0.74	15.69				9.27	0.17	6.3	7.7	2.15	0.14	0.05	3.87	1.77	4.28	0.64	3.29	1.17	0.58	1.63	0.32	2.06	0.45	1.36	0.21	1.2	0.18		285	318	56	266	139	147	41		43	0.02	0.11
2019-01-04	GEOROC	NESBITT, H. W.; YOUNG, G. M.; BOSMAN, S. A., 2009	52.4	-92.75	IGNEOUS	VOLCANIC	BASALT	3100	0	50.03	0.76	14.5				10.76	0.2	8.07	10.89	0.95	0.32	0.06	0.92	2.7	6.91	1.03	5.42	1.85	0.71	2.41	0.47	3.07	0.67	2.1	0.32	2.07	0.3		232	270	50	146	86	126	46.2		70	0.11	0.09
2019-01-06	GEOROC	NESBITT, H. W.; YOUNG, G. M.; BOSMAN, S. A., 2009	52.4	-92.75	IGNEOUS	VOLCANIC	BASALT	3100	0	51.36	0.54	11.23				9.29	0.2	8.23	14.26	0.89	0.12	0.05	2.28	1.64	4.03	0.59	3.2	1.05	0.45	1.62	0.33	2.17	0.44	1.32	0.21	1.29	0.18		262	522	44	127	54	63	33		119	0.06	0.12
2019-02-01	GEOROC	NESBITT, H. W.; YOUNG, G. M.; BOSMAN, S. A., 2009	52.4	-92.75	IGNEOUS	VOLCANIC	BASALT	3100	0	48.14	0.79	15.09				10.77	0.03	15.18	0.12	0.04	0.04	0.06	7.27	2.43	6.46	0.95	4.9	1.69	0.43	2.28	0.44	2.79	0.58	1.89	0.28	1.63	0.26		306	318	32	145	170	200	37		9	0.09	0.12
2019-02-02	GEOROC	NESBITT, H. W.; YOUNG, G. M.; BOSMAN, S. A., 2009	52.4	-92.75	IGNEOUS	VOLCANIC	BASALT	3100	0	46.74	0.63	8.87				13.45	0.15	16.92	4.56	0.59	0.13	0.04	5.06	1.61	5.13	0.85	4.41	1.54	0.85	2.06	0.38	2.24	0.43	1.26	0.18	1.01	0.15		234	1620	79	514	124		27		14	0.06	0.06
2019-02-03	GEOROC	NESBITT, H. W.; YOUNG, G. M.; BOSMAN, S. A., 2009	52.4	-92.75	IGNEOUS	VOLCANIC	BASALT	3100	0	49.27	0.5	14.34				16.73	0.12	8.09	1.14	0.05	0.52	0.01	6.36	0.44	1.1	0.16	0.84	0.33	0.1	0.66	0.15	1.07	0.23	0.79	0.13	0.78	0.13		281	3190	62	372	105	13	17		38	0.04	0.07
2019-02-04	GEOROC	NESBITT, H. W.; YOUNG, G. M.; BOSMAN, S. A., 2009	52.4	-92.75	IGNEOUS	VOLCANIC	BASALT	3100	0	47.63	0.25	8.16				8.57	0.16	9.74	8.44	1.94	0.02	0.02	13.77	0.68	1.63	0.22	1.14	0.42	0.2	0.65	0.15	1.03	0.23	0.76	0.11	0.66	0.1		214	423	50	114	101	73	13.1		7	0.02	0.25
2019-02-05	GEOROC	NESBITT, H. W.; YOUNG, G. M.; BOSMAN, S. A., 2009	52.4	-92.75	IGNEOUS	VOLCANIC	BASALT	3100	0	50.25	0.69	8.5				8.07	0.18	7.4	8.98		0.21	0.05	14.19	2.39	5.92	0.89	4.74	1.52	0.47	1.77	0.28	1.66	0.34	1	0.14	0.9	0.12		181	342	30	186	35	129	35.8		50	0.1	0.27
2019-02-06	GEOROC	NESBITT, H. W.; YOUNG, G. M.; BOSMAN, S. A., 2009	52.4	-92.75	IGNEOUS	VOLCANIC	BASALT	3100	0	45.74	0.6	11.58				10.84	0.2	4.36	10.47	2.35	0.45	0.05	12.24	2.18	5.14	0.75	4	1.24	0.51	1.6	0.3	1.88	0.41	1.33	0.2	1.31	0.19		224	25	32	63	78	130	35.7		73	0.07	0.18
2-7N	GEOROC	NESBITT, H. W.; YOUNG, G. M.; BOSMAN, S. A., 2009	52.4	-92.75	IGNEOUS	VOLCANIC	BASALT	3100	0	52.04	0.64	13.01				5.96	0.17	6.91	7.29	3.69	0.12	0.05	8.63	1.05	2.65	0.39	2.16	0.72	0.33	1.29	0.29	1.86	0.37	1.16	0.18	1.07	0.15		318	274	27	105	72	19	29.4		22	0.04	0.05
485402	GEOROC	ORDONEZ-CALDERON, J. C.; POLAT, A.; FRYER, B. J.; GAGNON, J. E.; RAITH, J. G.; APPEL, P. W. U., 2008	64.7301	-49.9287	IGNEOUS	VOLCANIC	BASALT	3080	0	50.74	1.34	14.61		11.46			0.13	10.15	7.41	3.7	0.46		1.98	1.49	2.62	0.29	1.19	0.31	0.29	0.46	0.1	0.78	0.22	0.85	0.16	1.36	0.26	47	308	129	37	73			71.5		60.2	0.1	0.02
485403	GEOROC	ORDONEZ-CALDERON, J. C.; POLAT, A.; FRYER, B. J.; GAGNON, J. E.; RAITH, J. G.; APPEL, P. W. U., 2008	64.7301	-49.9287	IGNEOUS	VOLCANIC	BASALT	3080	0	52.74	1.42	13.49		10.21			0.13	10.26	7.96	3.45	0.35		1.61	1.74	3.34	0.39	1.62	0.42	0.33	0.61	0.1	0.93	0.24	0.9	0.17	1.5	0.27	46	266	116	35	72			80.1		56.1	0.1	0.02
485404	GEOROC	ORDONEZ-CALDERON, J. C.; POLAT, A.; FRYER, B. J.; GAGNON, J. E.; RAITH, J. G.; APPEL, P. W. U., 2008	64.7302	-49.9269	IGNEOUS	VOLCANIC	BASALT	3080	0	50.04	1.61	13.87		15.62			0.23	6.62	9.41	2.15	0.26	0.19	0.62	3.93	11.79	1.92	9.94	3.27	1.18	4.55	0.76	5.14	1.09	3.22	0.47	3.1	0.46	42	327	133	43	74			90.8		112.5	0.23	0.19
485406	GEOROC	ORDONEZ-CALDERON, J. C.; POLAT, A.; FRYER, B. J.; GAGNON, J. E.; RAITH, J. G.; APPEL, P. W. U., 2008	64.7313	-49.9288	IGNEOUS	VOLCANIC	BASALT	3080	0	49.75	0.07	13.43		14.11			0.17	11.4	6.11	3.18		1.78	0.09	2.41	5.03	0.58	2.45	0.59	0.45	0.8	0.14	1.08	0.28	1.04	0.18	1.51	0.27	77		197	46	75			7.1		13.7	0.19	0.03
485407	GEOROC	ORDONEZ-CALDERON, J. C.; POLAT, A.; FRYER, B. J.; GAGNON, J. E.; RAITH, J. G.; APPEL, P. W. U., 2008	64.7313	-49.9288	IGNEOUS	VOLCANIC	BASALT	3080	0	48.09	0.61	13.45		14.53			0.13	6.77	14.5	1.77	0.13	0.02	0.8	2.25	6.87	1.3	8.03	3.39	0.76	4.85	0.86	5.82	1.26	3.66	0.5	3.14	0.45	24	312	151	49	101			68.7		19.7	0.1	0.21
485409	GEOROC	ORDONEZ-CALDERON, J. C.; POLAT, A.; FRYER, B. J.; GAGNON, J. E.; RAITH, J. G.; APPEL, P. W. U., 2008	64.7272	-49.93	IGNEOUS	VOLCANIC	BASALT	3080	0	50.62	1.59	13.98		14.85			0.22	5.67	9.53	2.95	0.33	0.26	0.36	5.86	15.56	2.3	11.47	3.57	1.35	5.06	0.88	5.85	1.3	3.85	0.54	3.56	0.54	43	256	104	39	70			76.4		47.4	0.17	0.17
485410	GEOROC	ORDONEZ-CALDERON, J. C.; POLAT, A.; FRYER, B. J.; GAGNON, J. E.; RAITH, J. G.; APPEL, P. W. U., 2008	64.7271	-49.9324	IGNEOUS	VOLCANIC	BASALT	3080	0	52.9	0.91	13.73		10.61			0.23	6.23	11.4	3.33	0.5	0.17	0.65	11.79	24.67	3.34	14.85	3.73	1.16	4.13	0.64	4.08	0.82	2.42	0.34	2.26	0.32	47	304	405	43	123			62		190.8	0.17	0.5
485411	GEOROC	ORDONEZ-CALDERON, J. C.; POLAT, A.; FRYER, B. J.; GAGNON, J. E.; RAITH, J. G.; APPEL, P. W. U., 2008	64.7282	-49.9262	IGNEOUS	VOLCANIC	BASALT	3080	0	54.37	0.87	16.36		7.65			0.13	2.37	17.23	0.91	0.03	0.08	2.52	0.65	3	0.71	4.44	1.91	0.3	2.76	0.51	3.49	0.76	2.33	0.34	2.22	0.34	23	77	73	16	71			43.4		18	0.04	0.02
485414	GEOROC	ORDONEZ-CALDERON, J. C.; POLAT, A.; FRYER, B. J.; GAGNON, J. E.; RAITH, J. G.; APPEL, P. W. U., 2008	64.7343	-49.9381	IGNEOUS	VOLCANIC	BASALT	3080	0	50.65	0.75	15.23		11.58			0.18	7.62	12.46	1.39	0.08	0.05	0.85	2.57	6.98	1.11	5.54	1.9	0.7	2.45	0.43	2.93	0.6	1.85	0.26	1.7	0.25	43	243	122	49	117			42.4		17.5	0.11	0.06
485415	GEOROC	ORDONEZ-CALDERON, J. C.; POLAT, A.; FRYER, B. J.; GAGNON, J. E.; RAITH, J. G.; APPEL, P. W. U., 2008	64.7344	-49.9383	IGNEOUS	VOLCANIC	BASALT	3080	0	52.31	1.09	18.27		10.06			0.2	4.37	9.6	3.89	0.17	0.05	0.45	2.81	7.65	1.19	5.81	1.95	0.82	2.65	0.46	3.11	0.67	2.01	0.3	1.86	0.28	50	321	233	67	180			56.1		42.7	0.16	0.11
485416	GEOROC	ORDONEZ-CALDERON, J. C.; POLAT, A.; FRYER, B. J.; GAGNON, J. E.; RAITH, J. G.; APPEL, P. W. U., 2008	64.7345	-49.9385	IGNEOUS	VOLCANIC	BASALT	3080	0	52.45	0.81	15.85		9.41			0.22	4.59	14.71	1.71	0.18	0.07	0.69	2.82	7.64	1.18	6.17	2.08	0.74	2.76	0.47	3.2	0.7	2.16	0.33	2.08	0.31	42	272	981	53	187			42.4		24.3	0.12	0.16
485439	GEOROC	ORDONEZ-CALDERON, J. C.; POLAT, A.; FRYER, B. J.; GAGNON, J. E.; RAITH, J. G.; APPEL, P. W. U., 2008	64.7477	-49.8959	IGNEOUS	VOLCANIC	BASALT	3080	0	50.62	0.24	5.86		7.9			0.3	9.77	25	0.18	0.07	0.05	1.96	1.51	2.77	0.38	1.82	0.53	0.32	0.74	0.13	0.92	0.21	0.61	0.09	0.57	0.09	23	123	6415	90	976			11.4		67.4	0.04	0.05
485440	GEOROC	ORDONEZ-CALDERON, J. C.; POLAT, A.; FRYER, B. J.; GAGNON, J. E.; RAITH, J. G.; APPEL, P. W. U., 2008	64.7477	-49.8959	IGNEOUS	VOLCANIC	BASALT	3080	0	48.66	0.31	7.68		8.94			0.34	8.89	24.59	0.52	0.06	0.03	1.67	1.69	3.49	0.47	2.1	0.68	0.22	0.91	0.16	1.19	0.29	0.94	0.14	0.94	0.16	23	151	8290	106	1152			16.3		60.2	0.06	0.06
485471	GEOROC	ORDONEZ-CALDERON, J. C.; POLAT, A.; FRYER, B. J.; GAGNON, J. E.; RAITH, J. G.; APPEL, P. W. U., 2008	74.69	-49.8584	IGNEOUS	VOLCANIC	BASALT	3080	0	54.53	0.43	10.64		8.87			0.26	5.79	18.83	0.46	0.15	0.04	0.66	1.4	3.59	0.53	2.59	0.92	0.34	1.57	0.29	2.15	0.48	1.43	0.21	1.47	0.22	29	174	229	46	110			18.1		53.9	0.04	0.06
496105	GEOROC	ORDONEZ-CALDERON, J. C.; POLAT, A.; FRYER, B. J.; GAGNON, J. E.; RAITH, J. G.; APPEL, P. W. U., 2008	64.7376	-49.8809	IGNEOUS	VOLCANIC	BASALT	3080	0	49.11	0.33	6.15		13.02			0.38	8.66	22.07	0.15	0.09	0.04	0.36	0.98	2.76	0.4	2.11	0.82	0.23	1.19	0.21	1.37	0.3	0.91	0.13	0.86	0.13	22	138	88	55	138			27.9		5.5	0.07	0.05
496111	GEOROC	ORDONEZ-CALDERON, J. C.; POLAT, A.; FRYER, B. J.; GAGNON, J. E.; RAITH, J. G.; APPEL, P. W. U., 2008	64.741	-49.8739	IGNEOUS	VOLCANIC	BASALT	3080	0	54.37	0.87	16.36		7.65			0.13	2.37	17.23	0.91	0.03	0.08	2.52	4.58	11.77	1.66	7.97	2.35	0.8	3.03	0.52	3.48	0.71	2.12	0.3	1.95	0.29	41	279	375	43	198			55.1		8.1	0.16	0.16
496112	GEOROC	ORDONEZ-CALDERON, J. C.; POLAT, A.; FRYER, B. J.; GAGNON, J. E.; RAITH, J. G.; APPEL, P. W. U., 2008	64.74	-49.8883	IGNEOUS	VOLCANIC	BASALT	3080	0	46.54	0.69	12.55		8.3			0.35	6.32	24.76	0.29	0.12	0.06	1.15	2.73	7.17	1.1	5.53	1.75	0.56	2.16	0.39	2.59	0.56	1.74	0.24	1.67	0.25	36	215	168	45	189			39.4		16.4	0.11	0.16
496114	GEOROC	ORDONEZ-CALDERON, J. C.; POLAT, A.; FRYER, B. J.; GAGNON, J. E.; RAITH, J. G.; APPEL, P. W. U., 2008	64.7276	-49.946	IGNEOUS	VOLCANIC	BASALT	3080	0	49.38	1.74	11.06		19			0.3	5.67	9.23	2.8	0.57	0.26	0.5	4.57	11.83	1.82	9.14	3.03	1.1	4.25	0.75	5.06	1.09	3.32	0.48	3.28	0.51	47	299	190	34	105			59.1		53.4	0.14	0.11
496116	GEOROC	ORDONEZ-CALDERON, J. C.; POLAT, A.; FRYER, B. J.; GAGNON, J. E.; RAITH, J. G.; APPEL, P. W. U., 2008	64.7307	-49.9445	IGNEOUS	VOLCANIC	BASALT	3080	0	48.09	0.93	16.82		13.5			0.14	6.79	9.44	3.34	0.87	0.08	0.77	1.78	4.83	0.85	5.01	2.22	0.64	3.78	0.73	5.24	1.18	3.67	0.55	3.62	0.54	40	273	119	48	106			49.9		264.4	0.08	0.11
496117	GEOROC	ORDONEZ-CALDERON, J. C.; POLAT, A.; FRYER, B. J.; GAGNON, J. E.; RAITH, J. G.; APPEL, P. W. U., 2008	64.7308	-49.9469	IGNEOUS	VOLCANIC	BASALT	3080	0	48.57	0.65	15.42		13.59			0.19	8.84	10.4	2.13	0.15	0.05	0.99	1.33	3.87	0.59	3.36	1.41	0.53	2.31	0.46	3.24	0.75	2.32	0.35	2.36	0.36	46	262	252	56	227			32.6		17.6	0.06	0.1
496118	GEOROC	ORDONEZ-CALDERON, J. C.; POLAT, A.; FRYER, B. J.; GAGNON, J. E.; RAITH, J. G.; APPEL, P. W. U., 2008	64.7317	-49.9421	IGNEOUS	VOLCANIC	BASALT	3080	0	48.33	0.61	15.25		12.84			0.21	8.47	13.13	1.08	0.05	0.04	0.95	1.04	3	0.51	3.04	1.34	0.5	2.25	0.45	3.23	0.74	2.34	0.34	2.32	0.34	50	278	395	58	239			31.2		8.9	0.03	0.04
496119	GEOROC	ORDONEZ-CALDERON, J. C.; POLAT, A.; FRYER, B. J.; GAGNON, J. E.; RAITH, J. G.; APPEL, P. W. U., 2008	64.7321	-49.937	IGNEOUS	VOLCANIC	BASALT	3080	0	48.22	0.78	15.87		12.73			0.2	8.27	11.91	1.74	0.21	0.06	0.67	2.06	6.05	0.9	4.71	1.69	0.57	2.28	0.41	2.83	0.61	1.82	0.26	1.72	0.26	44	278	275	53	236			40.5		14.2	0.1	0.06
496120	GEOROC	ORDONEZ-CALDERON, J. C.; POLAT, A.; FRYER, B. J.; GAGNON, J. E.; RAITH, J. G.; APPEL, P. W. U., 2008	64.7343	-49.9459	IGNEOUS	VOLCANIC	BASALT	3080	0	50.84	0.79	15.47		9.75			0.2	7.57	13.9	1.25	0.17	0.06	0.69	2.75	7.61	1.12	5.81	1.88	0.66	2.57	0.45	3.03	0.64	1.94	0.28	1.86	0.27	41	245	269	53	274			42.6		25	0.11	0.07
496122	GEOROC	ORDONEZ-CALDERON, J. C.; POLAT, A.; FRYER, B. J.; GAGNON, J. E.; RAITH, J. G.; APPEL, P. W. U., 2008	64.7315	-49.9602	IGNEOUS	VOLCANIC	BASALT	3080	0	48.7	0.5	16.56		10.71			0.21	9.93	10.96	2.07	0.32	0.04	1.23	1.38	3.92	0.58	3.09	1.12	0.4	1.56	0.29	1.91	0.42	1.24	0.18	1.17	0.18	42	216	301	54	279			21.2		51	0.07	0.04
496123	GEOROC	ORDONEZ-CALDERON, J. C.; POLAT, A.; FRYER, B. J.; GAGNON, J. E.; RAITH, J. G.; APPEL, P. W. U., 2008	64.7326	-49.9433	IGNEOUS	VOLCANIC	BASALT	3080	0	52.18	0.98	14.23		13.58			0.21	6.46	11.21	0.8	0.26	0.08	0.48	2.46	6.53	1.05	5.61	2.14	0.72	3.54	0.66	4.59	1.01	3.15	0.46	3.06	0.46	48	327	138	48	139			52.3		33.5	0.09	0.09
499716	GEOROC	ORDONEZ-CALDERON, J. C.; POLAT, A.; FRYER, B. J.; GAGNON, J. E.; RAITH, J. G.; APPEL, P. W. U., 2008	64.739	-49.879	IGNEOUS	VOLCANIC	BASALT	3080	0	49.78	1.8	1.03		14.94			0.33	8.48	23.25	0.33	0.06	0.01	0.01	6.85	20.76	3.08	14.33	3.76	1.52	4.38	0.72	4.68	0.98	2.96	0.44	3.21	0.52	62	129	168	81	416			113.4		285.5	1.79	1.81
499717	GEOROC	ORDONEZ-CALDERON, J. C.; POLAT, A.; FRYER, B. J.; GAGNON, J. E.; RAITH, J. G.; APPEL, P. W. U., 2008	64.741	-49.8732	IGNEOUS	VOLCANIC	BASALT	3080	0	47.42	0.64	15.67		11.43			0.23	2.87	21.51	0.11		0.11	1.38	5.82	14.06	2.09	10.64	3.49	1.24	4.79	0.78	4.94	1.01	2.84	0.38	2.29	0.32	29	305	245	40	239			37.6		12.5	0.11	0.18
499718	GEOROC	ORDONEZ-CALDERON, J. C.; POLAT, A.; FRYER, B. J.; GAGNON, J. E.; RAITH, J. G.; APPEL, P. W. U., 2008	64.7427	-49.8661	IGNEOUS	VOLCANIC	BASALT	3080	0	46.51	0.17	2.46		9.02			0.64	10.57	30.42	0.16	0.02	0.03	6.21	0.89	1.64	0.21	1.04	0.33	0.18	0.46	0.08	0.59	0.15	0.49	0.07	0.46	0.08	6	41	47	11	29			8.6		3.5	0.04	0.13
499740	GEOROC	ORDONEZ-CALDERON, J. C.; POLAT, A.; FRYER, B. J.; GAGNON, J. E.; RAITH, J. G.; APPEL, P. W. U., 2008	64.748	-49.896	IGNEOUS	VOLCANIC	BASALT	3080	0	45.6	0.31	12.17		11.18			0.27	6.7	23.51	0.16	0.06	0.03	1.42	1.77	3.45	0.47	2.34	0.89	1.21	1.2	0.21	1.41	0.29	0.85	0.12	0.79	0.12	26	203	1780	100	1391			25.8		12.9	0.05	0.16
499741	GEOROC	ORDONEZ-CALDERON, J. C.; POLAT, A.; FRYER, B. J.; GAGNON, J. E.; RAITH, J. G.; APPEL, P. W. U., 2008	64.748	-49.896	IGNEOUS	VOLCANIC	BASALT	3080	0	48.72	0.72	7.25		8.59			0.34	9.49	23.51	0.25	0.11	0.01	0.8	1.45	2.78	0.38	1.62	0.46	0.22	0.54	0.1	0.7	0.15	0.47	0.07	0.5	0.08	52	139	1863	152	2292			30.6		62.9	0.14	0.61
485417	GEOROC	POLAT, A.; APPEL, P. W. U.; FREI, R.; PAN, Y.; DILEK, Y.; ORDONEZ-CALDERON, J. C.; FRYER, B. J.; HOLLIS, J. A.; RAITH, J. G., 2007	64.7394	-49.9354	IGNEOUS	VOLCANIC	NOT-GIVEN	3080	0	47.94	0.45	11.26		11.67			0.18	14.81	12.33	1.2	0.14	0.03	1.44	1.95	4.92	0.73	3.59	1.13	0.37	1.52	0.27	1.9	0.4	1.23	0.18	1.19	0.18	36	178	5569	73	466	82.9	58.6	28.4	27.6	26.4	0.07	0.126
485418	GEOROC	POLAT, A.; APPEL, P. W. U.; FREI, R.; PAN, Y.; DILEK, Y.; ORDONEZ-CALDERON, J. C.; FRYER, B. J.; HOLLIS, J. A.; RAITH, J. G., 2007	64.7396	-49.9355	IGNEOUS	VOLCANIC	BASALT	3080	0	48.41	0.43	10.87		12.51			0.22	14.9	11.26	1.23	0.15	0.02	1.5	2.25	4.95	0.76	3.66	1.11	0.44	1.64	0.29	1.96	0.42	1.3	0.19	1.24	0.18	36	178	5713	93	605	93.5	15.5	22.3	30.7	45	0.07	0.101
485420	GEOROC	POLAT, A.; APPEL, P. W. U.; FREI, R.; PAN, Y.; DILEK, Y.; ORDONEZ-CALDERON, J. C.; FRYER, B. J.; HOLLIS, J. A.; RAITH, J. G., 2007	64.7389	-49.9364	IGNEOUS	VOLCANIC	BASALT	3080	0	52.06	0.51	12.01		11.17			0.19	10.12	12.66	1.23	0.01	0.04	0.82	3.31	7.83	1.06	4.96	1.39	0.46	1.85	0.33	2.28	0.48	1.46	0.21	1.4	0.21	37	199	2999	62	331	108.7	78.3	33.3	32.2	29.7	0.09	0.192
485443	GEOROC	POLAT, A.; APPEL, P. W. U.; FREI, R.; PAN, Y.; DILEK, Y.; ORDONEZ-CALDERON, J. C.; FRYER, B. J.; HOLLIS, J. A.; RAITH, J. G., 2007	64.7484	-49.8638	IGNEOUS	VOLCANIC	BASALT	3080	0	53.53	0.47	13.01		8.45			0.22	4.51	19.26	0.48	0.02	0.05	0.72	3.4	6.85	0.79	4.03	1.28	0.51	1.64	0.31	2	0.43	1.32	0.2	1.23	0.18	37	223	582	54	369	41		27.3	17	15.2	0.06	0.09
485444	GEOROC	POLAT, A.; APPEL, P. W. U.; FREI, R.; PAN, Y.; DILEK, Y.; ORDONEZ-CALDERON, J. C.; FRYER, B. J.; HOLLIS, J. A.; RAITH, J. G., 2007	64.7484	-49.8638	IGNEOUS	VOLCANIC	BASALT	3080	0	49.16	0.55	14.66		8.68			0.22	5.89	19.74	1.07	0.01	0.03	0.3	3.07	7.24	0.99	4.8	1.5	0.57	2.11	0.37	2.59	0.55	1.61	0.24	1.56	0.24	46	186	665	64	366	69	320	30	37	27.9	0.08	0.15
485446	GEOROC	POLAT, A.; APPEL, P. W. U.; FREI, R.; PAN, Y.; DILEK, Y.; ORDONEZ-CALDERON, J. C.; FRYER, B. J.; HOLLIS, J. A.; RAITH, J. G., 2007	64.7484	-49.8638	IGNEOUS	VOLCANIC	BASALT	3080	0	50.07	0.52	14.61		9.38			0.21	4.29	20.45	0.41	0.01	0.05	1.02	2.89	6.58	0.89	4.23	1.33	0.51	1.84	0.32	2.21	0.48	1.35	0.2	1.34	0.21	43	221	627	52	329	55	108	29.3	50	35.1	0.08	0.56
485448	GEOROC	POLAT, A.; APPEL, P. W. U.; FREI, R.; PAN, Y.; DILEK, Y.; ORDONEZ-CALDERON, J. C.; FRYER, B. J.; HOLLIS, J. A.; RAITH, J. G., 2007	64.7484	-49.8638	IGNEOUS	VOLCANIC	BASALT	3080	0	51.97	0.47	12.39		9.96			0.24	4.25	20.52	0.15	0.01	0.04	0.81	2.4	5.77	0.81	3.82	1.22	0.47	1.76	0.33	2.34	0.49	1.59	0.24	1.59	0.24	38	232	546	56	294	62	43	27.1	41	9.5	0.07	0.16
485451	GEOROC	POLAT, A.; APPEL, P. W. U.; FREI, R.; PAN, Y.; DILEK, Y.; ORDONEZ-CALDERON, J. C.; FRYER, B. J.; HOLLIS, J. A.; RAITH, J. G., 2007	64.7484	-49.8638	IGNEOUS	VOLCANIC	BASALT	3080	0	51.33	0.56	14.02		10.2			0.22	7.86	14.16	1.5	0.11	0.04	3.76	3.21	7.4	1.03	4.74	1.34	0.5	2.06	0.35	2.48	0.54	1.64	0.25	1.56	0.25	47	243	634	52	253	112	51	32.8	40	39	0.1	0.25
485453	GEOROC	POLAT, A.; APPEL, P. W. U.; FREI, R.; PAN, Y.; DILEK, Y.; ORDONEZ-CALDERON, J. C.; FRYER, B. J.; HOLLIS, J. A.; RAITH, J. G., 2007	64.7484	-49.8638	IGNEOUS	VOLCANIC	BASALT	3080	0	51.39	0.58	14.57		10.83			0.2	8.24	11.41	2.56	0.18	0.02	0.8	2.64	6.72	0.98	4.6	1.43	0.52	2.18	0.38	2.6	0.57	1.68	0.25	1.62	0.25	46	251	688	63	319	123	5	34.1	37	48.7	0.09	0.26
485457	GEOROC	POLAT, A.; APPEL, P. W. U.; FREI, R.; PAN, Y.; DILEK, Y.; ORDONEZ-CALDERON, J. C.; FRYER, B. J.; HOLLIS, J. A.; RAITH, J. G., 2007	64.7484	-49.8638	IGNEOUS	VOLCANIC	BASALT	3080	0	49.48	0.56	14.55		11.57			0.23	8.65	12.89	1.89	0.15	0.04	0.82	2.75	6.98	0.99	5	1.63	0.52	2.32	0.42	2.87	0.64	1.89	0.28	1.83	0.27	46	251	670	69	315	130	11	35	38	44.1	0.09	0.19
485458	GEOROC	POLAT, A.; APPEL, P. W. U.; FREI, R.; PAN, Y.; DILEK, Y.; ORDONEZ-CALDERON, J. C.; FRYER, B. J.; HOLLIS, J. A.; RAITH, J. G., 2007	64.7484	-49.8638	IGNEOUS	VOLCANIC	BASALT	3080	0	48.52	0.57	14.16		12.09			0.22	9.45	13.18	1.62	0.16	0.04	0.89	2.6	6.7	0.95	4.49	1.52	0.42	2.1	0.39	2.6	0.58	1.7	0.24	1.53	0.23	46	220	642	60	255	123	4	34.1	38	44.1	0.11	0.17
485459	GEOROC	POLAT, A.; APPEL, P. W. U.; FREI, R.; PAN, Y.; DILEK, Y.; ORDONEZ-CALDERON, J. C.; FRYER, B. J.; HOLLIS, J. A.; RAITH, J. G., 2007	64.7484	-49.8638	IGNEOUS	VOLCANIC	BASALT	3080	0	51.97	0.53	13.28		11.19			0.22	8.59	12.08	1.94	0.15	0.04	0.95	2.56	6.14	0.86	4.16	1.37	0.46	1.95	0.35	2.45	0.53	1.56	0.23	1.5	0.23	42	231	592	61	314	131	20	32.6	36	39.9	0.08	0.17
485460	GEOROC	POLAT, A.; APPEL, P. W. U.; FREI, R.; PAN, Y.; DILEK, Y.; ORDONEZ-CALDERON, J. C.; FRYER, B. J.; HOLLIS, J. A.; RAITH, J. G., 2007	64.7484	-49.8638	IGNEOUS	VOLCANIC	BASALT	3080	0	47.44	0.56	14.85		12.7			0.24	9.38	12.98	1.63	0.19	0.03	1	2.48	6.47	0.83	4.05	1.28	0.48	1.94	0.34	2.32	0.5	1.5	0.21	1.5	0.22	44	227	631	63	271	120	6	32.8	39	45.2	0.07	0.16
485461	GEOROC	POLAT, A.; APPEL, P. W. U.; FREI, R.; PAN, Y.; DILEK, Y.; ORDONEZ-CALDERON, J. C.; FRYER, B. J.; HOLLIS, J. A.; RAITH, J. G., 2007	64.7484	-49.8638	IGNEOUS	VOLCANIC	BASALT	3080	0	47.47	0.56	14.74		12.85			0.24	9.4	12.9	1.61	0.21	0.03	0.93	2.07	5.57	0.81	4.08	1.34	0.49	2.01	0.37	2.49	0.55	1.57	0.24	1.65	0.24	45	225	623	63	265	153	32	32.5	44	68.9	0.08	0.09
485462	GEOROC	POLAT, A.; APPEL, P. W. U.; FREI, R.; PAN, Y.; DILEK, Y.; ORDONEZ-CALDERON, J. C.; FRYER, B. J.; HOLLIS, J. A.; RAITH, J. G., 2007	64.7484	-49.8638	IGNEOUS	VOLCANIC	BASALT	3080	0	50.32	0.55	12.23		12.34			0.24	10.32	11.83	1.86	0.25	0.04	1	2.23	5.75	0.86	3.99	1.33	0.47	1.99	0.35	2.44	0.52	1.53	0.23	1.5	0.23	45	229	604	62	207	143	4	33.1	40	56.9	0.08	0.13
485464	GEOROC	POLAT, A.; APPEL, P. W. U.; FREI, R.; PAN, Y.; DILEK, Y.; ORDONEZ-CALDERON, J. C.; FRYER, B. J.; HOLLIS, J. A.; RAITH, J. G., 2007	64.7484	-49.8638	IGNEOUS	VOLCANIC	BASALT	3080	0	51.12	0.54	14.72		10.65			0.19	8.21	11.71	2.63	0.18	0.05	0.76	2.03	5.63	0.84	4.12	1.45	0.52	1.99	0.35	2.55	0.55	1.72	0.24	1.57	0.24	44	217	631	49	264	103	9	32.3	47	73.3	0.09	0.15
485465	GEOROC	POLAT, A.; APPEL, P. W. U.; FREI, R.; PAN, Y.; DILEK, Y.; ORDONEZ-CALDERON, J. C.; FRYER, B. J.; HOLLIS, J. A.; RAITH, J. G., 2007	64.7484	-49.8638	IGNEOUS	VOLCANIC	BASALT	3080	0	48.22	0.57	13.15		12.82			0.26	10.4	13.06	1.33	0.15	0.03	1.01	1.72	4.88	0.75	3.64	1.2	0.45	1.91	0.35	2.43	0.57	1.67	0.24	1.64	0.25	45	218	640	68	228	143	7	34.3	40	53.5	0.08	0.14
485466	GEOROC	POLAT, A.; APPEL, P. W. U.; FREI, R.; PAN, Y.; DILEK, Y.; ORDONEZ-CALDERON, J. C.; FRYER, B. J.; HOLLIS, J. A.; RAITH, J. G., 2007	64.7484	-49.8638	IGNEOUS	VOLCANIC	BASALT	3080	0	49.89	0.5	13.36		11.82			0.21	9.8	12.35	1.86	0.16	0.05	0.87	2.45	6.18	0.86	4.12	1.29	0.44	1.87	0.35	2.34	0.5	1.49	0.22	1.47	0.23	41	204	603	51	248	123	11	30.7	38	45.2	0.08	0.15
485473	GEOROC	POLAT, A.; APPEL, P. W. U.; FREI, R.; PAN, Y.; DILEK, Y.; ORDONEZ-CALDERON, J. C.; FRYER, B. J.; HOLLIS, J. A.; RAITH, J. G., 2007	64.7461	-49.8553	IGNEOUS	VOLCANIC	PICRITE	3080	0	50.34	0.27	6.36		9.21			0.17	23.09	10.23	0.3	0.02	0.01	4.15	1.69	4.1	0.52	2.35	0.73	0.23	0.98	0.18	1.2	0.26	0.85	0.13	0.84	0.13	24	104	1575	84	845	79.2	10.8	12.5	15	1.9	0.05	0.293
485474	GEOROC	POLAT, A.; APPEL, P. W. U.; FREI, R.; PAN, Y.; DILEK, Y.; ORDONEZ-CALDERON, J. C.; FRYER, B. J.; HOLLIS, J. A.; RAITH, J. G., 2007	64.7461	-49.8553	IGNEOUS	VOLCANIC	PICRITE	3080	0	48.73	0.28	7.05		10.42			0.17	23.51	9.56	0.25	0.01	0.02	4.64	1.59	3.75	0.54	2.43	0.7	0.22	0.98	0.17	1.26	0.27	0.82	0.12	0.81	0.12	24	112	1670	84	852	91.2	14.4	14.6	17.8	10.9	0.05	0.668
485475	GEOROC	POLAT, A.; APPEL, P. W. U.; FREI, R.; PAN, Y.; DILEK, Y.; ORDONEZ-CALDERON, J. C.; FRYER, B. J.; HOLLIS, J. A.; RAITH, J. G., 2007	64.7461	-49.8553	IGNEOUS	VOLCANIC	PICRITE	3080	0	48.84	0.27	6.28		9.9			0.17	22.29	12.03	0.2	0.01	0.01	3.97	1.82	4.26	0.63	2.89	0.87	0.21	1.22	0.22	1.52	0.33	0.99	0.14	1.03	0.15	26	107	1654	83	735	80.6	6.7	15.6	16.1	6.1	0.06	0.183
485478	GEOROC	POLAT, A.; APPEL, P. W. U.; FREI, R.; PAN, Y.; DILEK, Y.; ORDONEZ-CALDERON, J. C.; FRYER, B. J.; HOLLIS, J. A.; RAITH, J. G., 2007	64.746	-49.8555	IGNEOUS	VOLCANIC	PICRITE	3080	0	48.16	0.26	7.19		10.32			0.18	23.19	10.39	0.26	0.01	0.03	4.66	1.92	4.14	0.56	2.55	0.73	0.23	1.06	0.17	1.24	0.26	0.83	0.12	0.86	0.12	23	107	1692	84	897	85.5	19.1	10.5	16.9	2.6	0.05	0.284
485481	GEOROC	POLAT, A.; APPEL, P. W. U.; FREI, R.; PAN, Y.; DILEK, Y.; ORDONEZ-CALDERON, J. C.; FRYER, B. J.; HOLLIS, J. A.; RAITH, J. G., 2007	64.7419	-49.8883	IGNEOUS	VOLCANIC	BASALT	3080	0	50.39	0.35	8.69		11.08			0.2	18.61	8.46	0.86	1.33	0.03	2.05	3.56	7.8	1	4.34	1.1	0.41	1.54	0.25	1.84	0.38	1.19	0.18	1.24	0.18	28	142	1298	81	608	92.3	2.6	25.5	52.6	216.1	0.08	0.148
485482	GEOROC	POLAT, A.; APPEL, P. W. U.; FREI, R.; PAN, Y.; DILEK, Y.; ORDONEZ-CALDERON, J. C.; FRYER, B. J.; HOLLIS, J. A.; RAITH, J. G., 2007	64.7419	-49.8894	IGNEOUS	VOLCANIC	BASALT	3080	0	49.75	0.37	9.02		10.65			0.18	17.1	11.5	1.38	0.03	0.02	1.8	3.34	7.96	1.04	4.57	1.17	0.41	1.54	0.27	1.75	0.39	1.15	0.18	1.21	0.19	26	136	1414	81	659	78.3	5.2	29.5	23.9	9.6	0.09	0.286
485418	GEOROC	POLAT, A.; FREI, R.; APPEL, P. W. U.; DILEK, Y.; FRYER, B. J.; ORDONEZ-CALDERON, J. C.; YANG, ZHIMING, 2008	64.7396	-49.9355	IGNEOUS	VOLCANIC	BASALT	3080	0	48.41	0.43	10.87	12.51				0.22	14.9	11.26	1.23	0.15	0.02	1.5	2.25	4.95	0.76	3.66	1.11	0.44	1.64	0.29	1.96	0.42	1.3	0.19	1.24	0.18	35.5	178	5713	93	605	93.5	15.5	22.3	30.7	45	0.07	0.101
485420	GEOROC	POLAT, A.; FREI, R.; APPEL, P. W. U.; DILEK, Y.; FRYER, B. J.; ORDONEZ-CALDERON, J. C.; YANG, ZHIMING, 2008	64.7389	-49.9364	IGNEOUS	VOLCANIC	BASALT	3080	0	52.06	0.51	12.01	11.17				0.19	10.12	12.66	1.23	0.01	0.04	0.82	3.31	7.83	1.06	4.96	1.39	0.46	1.85	0.33	2.28	0.48	1.46	0.21	1.4	0.21	37.3	199	2999	62	331	108.7	78.3	33.3	32.2	30	0.09	0.192
485422	GEOROC	POLAT, A.; FREI, R.; APPEL, P. W. U.; DILEK, Y.; FRYER, B. J.; ORDONEZ-CALDERON, J. C.; YANG, ZHIMING, 2008	64.7389	-49.9364	IGNEOUS	VOLCANIC	BASALT	3080	0	47.72	0.45	10.58	12.31				0.2	17.27	9.64	0.89	0.9	0.04	2.93	2.39	5.6	0.77	3.88	1.149	0.38	1.59	0.28	1.89	0.41	1.27	0.18	1.19	0.18	35	173	5282	83	647	98.9	8	27.5	46	137	0.07	0.167
485468	GEOROC	POLAT, A.; FREI, R.; APPEL, P. W. U.; DILEK, Y.; FRYER, B. J.; ORDONEZ-CALDERON, J. C.; YANG, ZHIMING, 2008	64.7466	-49.8591	IGNEOUS	VOLCANIC	BASALT	3080	0	50.09	0.6	14.12	11.6				0.19	9.75	10.78	2.67	0.14	0.05	0.85	2.98	7.6	1.09	5.19	1.586	0.58	2.17	0.39	2.65	0.57	1.73	0.23	1.5	0.22	37.3	234	230	57	125	104.7	43.1	36.3	39.6	37	0.11	0.19
485469	GEOROC	POLAT, A.; FREI, R.; APPEL, P. W. U.; DILEK, Y.; FRYER, B. J.; ORDONEZ-CALDERON, J. C.; YANG, ZHIMING, 2008	64.7469	-49.858	IGNEOUS	VOLCANIC	BASALT	3080	0	50.95	0.56	14.49	10.85				0.17	8.9	11.27	2.63	0.14	0.05	0.69	2.85	7.08	1.01	4.86	1.486	0.57	1.99	0.36	2.56	0.55	1.59	0.23	1.47	0.22	37.3	294	300	55	128	99.1	40.7	30.2	42.2	58	0.09	0.183
485470	GEOROC	POLAT, A.; FREI, R.; APPEL, P. W. U.; DILEK, Y.; FRYER, B. J.; ORDONEZ-CALDERON, J. C.; YANG, ZHIMING, 2008	64.7469	-49.858	IGNEOUS	VOLCANIC	BASALT	3080	0	51.74	0.54	14.32	10.33				0.17	8.59	11.94	2.16	0.16	0.05	0.6	2.84	6.99	1	4.83	1.43	0.56	1.9	0.37	2.44	0.51	1.61	0.23	1.49	0.21	36.2	291	300	57	141	91.2	94.9	28.2	40.3	49	0.1	0.145
485473	GEOROC	POLAT, A.; FREI, R.; APPEL, P. W. U.; DILEK, Y.; FRYER, B. J.; ORDONEZ-CALDERON, J. C.; YANG, ZHIMING, 2008	64.7461	-49.8553	IGNEOUS	VOLCANIC	PICRITE	3080	0	50.34	0.27	6.36	9.21				0.17	23.09	10.23	0.3	0.02	0.01	4.15	1.69	4.1	0.52	2.35	0.73	0.23	0.98	0.18	1.2	0.26	0.85	0.13	0.84	0.13	24	104	1575	84	845	79.2	10.8	12.5	15	1.9	0.05	0.293
485474	GEOROC	POLAT, A.; FREI, R.; APPEL, P. W. U.; DILEK, Y.; FRYER, B. J.; ORDONEZ-CALDERON, J. C.; YANG, ZHIMING, 2008	64.7461	-49.8553	IGNEOUS	VOLCANIC	PICRITE	3080	0	48.73	0.28	7.05	10.42				0.17	23.51	9.56	0.25	0.01	0.02	4.64	1.59	3.75	0.54	2.43	0.7	0.22	0.98	0.17	1.26	0.27	0.82	0.12	0.81	0.12	24	112	1670	84	852	91.2	14.4	14.6	17.8	10.9	0.05	0.668
485475	GEOROC	POLAT, A.; FREI, R.; APPEL, P. W. U.; DILEK, Y.; FRYER, B. J.; ORDONEZ-CALDERON, J. C.; YANG, ZHIMING, 2008	64.7461	-49.8553	IGNEOUS	VOLCANIC	PICRITE	3080	0	48.84	0.27	6.28	9.9				0.17	22.29	12.03	0.2	0.01	0.01	3.97	1.82	4.26	0.63	2.89	0.87	0.21	1.22	0.22	1.52	0.33	0.99	0.14	1.03	0.15	26	107	1654	83	735	80.6	6.7	15.6	16.1	6.1	0.06	0.183
485481	GEOROC	POLAT, A.; FREI, R.; APPEL, P. W. U.; DILEK, Y.; FRYER, B. J.; ORDONEZ-CALDERON, J. C.; YANG, ZHIMING, 2008	64.7419	-49.8883	IGNEOUS	VOLCANIC	BASALT	3080	0	50.39	0.35	8.69	11.08				0.2	18.61	8.46	0.86	1.33	0.03	2.05	3.56	7.8	1	4.34	1.1	0.41	1.54	0.25	1.84	0.38	1.19	0.18	1.24	0.18	27.6	142	1298	81	608	92.3	2.6	25.5	52.6	216	0.08	0.148
485482	GEOROC	POLAT, A.; FREI, R.; APPEL, P. W. U.; DILEK, Y.; FRYER, B. J.; ORDONEZ-CALDERON, J. C.; YANG, ZHIMING, 2008	64.7419	-49.8894	IGNEOUS	VOLCANIC	BASALT	3080	0	49.75	0.37	9.02	10.65				0.18	17.1	11.5	1.38	0.03	0.02	1.8	3.34	7.96	1.04	4.57	1.17	0.41	1.54	0.27	1.75	0.39	1.15	0.18	1.21	0.19	26.5	136	1414	81	659	78.3	5.2	29.5	23.9	10	0.09	0.286
485486	GEOROC	POLAT, A.; FREI, R.; APPEL, P. W. U.; DILEK, Y.; FRYER, B. J.; ORDONEZ-CALDERON, J. C.; YANG, ZHIMING, 2008	64.7406	-49.9067	IGNEOUS	VOLCANIC	BASALT	3080	0	48.31	0.37	8.7	13.91				0.25	18.77	8.62	0.96	0.08	0.03	2.46	3.31	7.52	0.93	3.95	1.075	0.28	1.52	0.25	1.7	0.36	1.06	0.16	1.08	0.16	27.7	204	1640	81	705	110.7	25.7	27.7	24.9	31	0.09	0.26
499702MA	GEOROC	POLAT, A.; FREI, R.; FRYER, B. J.; APPEL, P. W. U., 2009	64.7463	-49.8599	IGNEOUS	VOLCANIC	BASALT	3080	0	48.2	0.63	14.2		12.7			0.25	8.7	13.7	1.2	0.21	0.05	0.64	3.23	8.09	1.21	5.274	1.652	0.57	2.45	0.44	2.95	0.63	1.87	0.28	1.86	0.28	44.4	245	488	60	122	192	12	43	21.6	38	0.43	0.21
499702OC	GEOROC	POLAT, A.; FREI, R.; FRYER, B. J.; APPEL, P. W. U., 2009	64.7463	-49.8599	IGNEOUS	VOLCANIC	BASALT	3080	0	52.7	0.57	14.5		8.2			0.22	5.5	17.2	1.02	0.07	0.06	0.26	3.76	8.44	1.17	5.121	1.502	0.58	2.19	0.39	2.63	0.57	1.73	0.26	1.65	0.26	40	228	465	49	119	103	66	38	17.4	26	0.26	0.38
499705MA	GEOROC	POLAT, A.; FREI, R.; FRYER, B. J.; APPEL, P. W. U., 2009	64.7467	-49.8589	IGNEOUS	VOLCANIC	BASALT	3080	0	48.7	0.6	13		13.3			0.23	9.5	13.3	1.23	0.16	0.05	0.63	2.71	7.13	1.07	4.716	1.422	0.51	2.2	0.39	2.59	0.56	1.69	0.25	1.59	0.24	42.7	239	443	56	124	92	3	32	13.3	33	0.11	0.14
499705OC	GEOROC	POLAT, A.; FREI, R.; FRYER, B. J.; APPEL, P. W. U., 2009	64.7467	-49.8589	IGNEOUS	VOLCANIC	BASALT	3080	0	54	0.53	14.7		8.2			0.18	5.9	15.2	1.21	0.06	0.05	0.37	3.77	7.99	1.08	4.825	1.426	0.54	2.07	0.37	2.56	0.56	1.67	0.24	1.64	0.25	42	228	486	50	158	81	54	39	14.7	29	0.1	0.19
499708C	GEOROC	POLAT, A.; FREI, R.; FRYER, B. J.; APPEL, P. W. U., 2009	64.7485	-49.6838	IGNEOUS	VOLCANIC	BASALT	3080	0	54.9	0.54	13.9		9.6			0.17	7.6	11.1	2.04	0.19	0.05	0.64	2.71	6.33	0.86	4.272	1.321	0.48	1.87	0.34	2.35	0.51	1.54	0.22	1.5	0.22	46	129	674	77	283	85	9	38	39	58	0.08	0.2
499710A	GEOROC	POLAT, A.; FREI, R.; FRYER, B. J.; APPEL, P. W. U., 2009	64.7487	-49.8627	IGNEOUS	VOLCANIC	BASALT	3080	0	51.1	0.58	17.5		8.9			0.17	5.9	14.4	1.29	0.14	0.06	0.5	3.09	7.06	0.97	4.698	1.473	0.52	2	0.36	2.51	0.54	1.66	0.24	1.61	0.24	47	132	734	67	266	72	60	40	42	36	0.08	0.19
499710B	GEOROC	POLAT, A.; FREI, R.; FRYER, B. J.; APPEL, P. W. U., 2009	64.7487	-49.8627	IGNEOUS	VOLCANIC	BASALT	3080	0	48.1	0.56	11.9		14.1			0.26	10.7	13	1.23	0.21	0.03	0.81	2.31	5.71	0.82	3.983	1.229	0.39	1.83	0.33	2.25	0.49	1.5	0.22	1.49	0.23	48	153	726	117	334	120	5	38	32	31	0.08	0.13
499710MA	GEOROC	POLAT, A.; FREI, R.; FRYER, B. J.; APPEL, P. W. U., 2009	64.7487	-49.8627	IGNEOUS	VOLCANIC	BASALT	3080	0	52.8	0.55	14		10.6			0.2	7.8	11.9	1.95	0.13	0.04	0.61	2.57	6.14	0.89	3.981	1.254	0.49	1.99	0.36	2.44	0.55	1.64	0.25	1.63	0.25	46	245	714	76	289	121	16	58	13.2	103	0.09	0.17
499713A	GEOROC	POLAT, A.; FREI, R.; FRYER, B. J.; APPEL, P. W. U., 2009	64.749	-49.8595	IGNEOUS	VOLCANIC	BASALT	3080	0	51.5	0.59	15.8		10			0.18	7.7	12.5	1.52	0.16	0.05	0.8	2.6	6.29	0.88	4.375	1.362	0.48	1.91	0.35	2.45	0.54	1.63	0.24	1.6	0.24	49	139	645	76	285	94	12	44	36	28	0.08	0.2
499713B	GEOROC	POLAT, A.; FREI, R.; FRYER, B. J.; APPEL, P. W. U., 2009	64.749	-49.8595	IGNEOUS	VOLCANIC	BASALT	3080	0	48.3	0.61	15.8		11.7			0.22	9	12.3	1.69	0.25	0.05	0.85	2.4	6.35	0.92	4.382	1.378	0.51	2.08	0.38	2.65	0.58	1.76	0.25	1.71	0.25	47	147	555	88	294	112	6	40	37	39	0.09	0.16
499714MA	GEOROC	POLAT, A.; FREI, R.; FRYER, B. J.; APPEL, P. W. U., 2009	64.7464	-49.8525	IGNEOUS	VOLCANIC	BASALT	3080	0	54.7	0.56	14.9		9.3			0.17	6.5	12.4	1.22	0.16	0.05	0.59	3.12	6.59	0.93	4.38	1.33	0.54	1.99	0.37	2.51	0.57	1.69	0.25	1.64	0.25	47.9	249	593	63	303	155	3	71	15.7	31	0.09	0.19
485405	GEOROC	ORDONEZ-CALDERON, J. C.; POLAT, A.; FRYER, B. J.; GAGNON, J. E.; RAITH, J. G.; APPEL, P. W. U., 2008	64.7306	-49.927	IGNEOUS	VOLCANIC	BASALT	3075	0	51.25	1.04	14.6		12.03			0.19	8.14	10.12	2.36	0.08	0.19	0.79	4.09	12.03	1.9	9.82	3.14	1.24	4.18	0.71	4.7	1.01	2.99	0.43	2.83	0.43	35	195	245	42	92			94.8		17.4	0.15	0.13
485441	GEOROC	POLAT, A.; APPEL, P. W. U.; FREI, R.; PAN, Y.; DILEK, Y.; ORDONEZ-CALDERON, J. C.; FRYER, B. J.; HOLLIS, J. A.; RAITH, J. G., 2007	64.7484	-49.8638	IGNEOUS	VOLCANIC	BASALT	3075	0	50.45	0.57	15.36		7.87			0.21	4.39	20.76	0.34	0.01	0.04	1.24	2.82	6.72	0.92	4.47	1.46	0.47	1.92	0.35	2.45	0.53	1.58	0.23	1.52	0.22	47	233	735	63	403	65	133	32.5	45	25.7	0.09	0.19
498206	GEOROC	ORDONEZ-CALDERON, J. C.; POLAT, A.; FRYER, B. J.; APPEL, P. W. U.; VAN GOOL, J. A. M.; DILEK, Y.; GAGNON, J. E., 2009	64.8494	-50.2108	IGNEOUS	VOLCANIC	THOLEIITE	3070	0	50.1	0.66	14.9		12.28			0.21	7.13	12.08	1.81	0.79	0.05	1.24	1.21	3.04	0.54	2.78	1.29	0.47	2.15	0.42	2.97	0.7	2.12	0.32	2.14	0.32	47	279	307	54	171			44.1	41	91.84	0.03	0.19
498211	GEOROC	ORDONEZ-CALDERON, J. C.; POLAT, A.; FRYER, B. J.; APPEL, P. W. U.; VAN GOOL, J. A. M.; DILEK, Y.; GAGNON, J. E., 2009	64.8481	-50.2065	IGNEOUS	VOLCANIC	THOLEIITE	3070	0	47.2	1.01	16.15		15.71			0.24	6.34	10.28	2.81	0.13	0.09	0.35	2.46	6.7	1.02	5.55	2.05	0.78	3.58	0.67	4.85	1.06	3.39	0.51	3.31	0.53	48	297	143	52	78			60.1	41	31.73	0.08	0.08
498218	GEOROC	ORDONEZ-CALDERON, J. C.; POLAT, A.; FRYER, B. J.; APPEL, P. W. U.; VAN GOOL, J. A. M.; DILEK, Y.; GAGNON, J. E., 2009	64.8367	-50.2148	IGNEOUS	VOLCANIC	THOLEIITE	3070	0	48.1	0.65	16.03		12.94			0.2	8.66	10.28	2.7	0.35	0.07	1.08	1.59	3.74	0.58	3.08	1.27	0.5	2.07	0.43	3.03	0.72	2.18	0.32	2.33	0.35	43	240	244	48	149			36.3	36	51.91	0.05	0.15
498219	GEOROC	ORDONEZ-CALDERON, J. C.; POLAT, A.; FRYER, B. J.; APPEL, P. W. U.; VAN GOOL, J. A. M.; DILEK, Y.; GAGNON, J. E., 2009	64.85	-50.1971	IGNEOUS	VOLCANIC	THOLEIITE	3070	0	49.3	0.72	14.93		13.26			0.21	8.44	10.37	2.3	0.44	0.05	0.97	2.2	5.2	0.74	3.66	1.36	0.55	2.35	0.49	3.54	0.82	2.45	0.37	2.45	0.38	54	285	301	45	100			31.5	36	55.65	0.06	0.24
498220	GEOROC	ORDONEZ-CALDERON, J. C.; POLAT, A.; FRYER, B. J.; APPEL, P. W. U.; VAN GOOL, J. A. M.; DILEK, Y.; GAGNON, J. E., 2009	64.8469	-50.2122	IGNEOUS	VOLCANIC	NOT-GIVEN	3070	0	47.9	0.11	4.72		11			0.15	33.87	1.91	0.23	0.08	0.03	4.65	0.35	0.91	0.09	0.48	0.13	0.04	0.33	0.06	0.47	0.12	0.38	0.06	0.45	0.07	20	117	4141	108	997			4.19	9	2.86	0.01	0.05
498224	GEOROC	ORDONEZ-CALDERON, J. C.; POLAT, A.; FRYER, B. J.; APPEL, P. W. U.; VAN GOOL, J. A. M.; DILEK, Y.; GAGNON, J. E., 2009	64.8243	-50.2283	IGNEOUS	VOLCANIC	THOLEIITE	3070	0	48.6	0.62	15.8		12.04			0.21	7.88	12.47	1.84	0.5	0.06	1.01	1.89	4.74	0.62	3.58	1.28	0.48	2.28	0.45	3.18	0.73	2.23	0.32	2.22	0.35	44	251	263	53	150			31.5	32	36.29	0.05	0.11
498227	GEOROC	ORDONEZ-CALDERON, J. C.; POLAT, A.; FRYER, B. J.; APPEL, P. W. U.; VAN GOOL, J. A. M.; DILEK, Y.; GAGNON, J. E., 2009	64.8565	-50.1919	IGNEOUS	VOLCANIC	THOLEIITE	3070	0	54	0.65	13.09		9.85			0.21	6.61	14.07	1.3	0.19	0.05	1.84	1.57	4.32	0.66	3.3	1.31	0.54	2.04	0.39	2.61	0.59	1.71	0.24	1.73	0.26	40	244	351	39	138			30.6	29	33.84	0.06	0.18
498228	GEOROC	ORDONEZ-CALDERON, J. C.; POLAT, A.; FRYER, B. J.; APPEL, P. W. U.; VAN GOOL, J. A. M.; DILEK, Y.; GAGNON, J. E., 2009	64.8581	-50.1903	IGNEOUS	VOLCANIC	NOT-GIVEN	3070	0	53.3	0.32	15.19		10.45			0.21	10.75	7.58	1.87	0.32	0.04	2.68	2.06	4.19	0.55	2.52	0.68	0.31	1.3	0.24	1.97	0.44	1.43	0.22	1.52	0.25	46	223	456	47	124			22.5	29	50.48	0.03	0.36
498229	GEOROC	ORDONEZ-CALDERON, J. C.; POLAT, A.; FRYER, B. J.; APPEL, P. W. U.; VAN GOOL, J. A. M.; DILEK, Y.; GAGNON, J. E., 2009	64.8581	-50.1908	IGNEOUS	VOLCANIC	THOLEIITE	3070	0	48.1	0.8	16.24		12.7			0.22	8.39	10.62	2.79	0.13	0.06	1.28	2.14	6.15	1	4.85	1.77	0.68	2.43	0.44	2.88	0.6	1.85	0.27	1.8	0.26	40	247	263	54	190			45.7	34	32.57	0.09	0.23
498235	GEOROC	ORDONEZ-CALDERON, J. C.; POLAT, A.; FRYER, B. J.; APPEL, P. W. U.; VAN GOOL, J. A. M.; DILEK, Y.; GAGNON, J. E., 2009	64.8619	-50.1987	IGNEOUS	VOLCANIC	THOLEIITE	3070	0	51.2	0.79	14.6		11.31			0.21	6.26	13.9	1.3	0.34	0.06	1.2	1.72	4.58	0.74	4.02	1.56	0.61	2.5	0.46	3.1	0.72	2.07	0.3	2.11	0.33	50	285	319	45	138			42.5	33	17.95	0.07	0.07
498237	GEOROC	ORDONEZ-CALDERON, J. C.; POLAT, A.; FRYER, B. J.; APPEL, P. W. U.; VAN GOOL, J. A. M.; DILEK, Y.; GAGNON, J. E., 2009	64.8928	-50.2145	IGNEOUS	VOLCANIC	THOLEIITE	3070	0	49.3	0.96	15.58		12.73			0.19	7.99	10.72	2.43	0.06	0.08	0.66	2.68	7.42	1.21	6.11	2.18	0.83	3.02	0.51	3.51	0.77	2.23	0.33	2.15	0.32	38	266	238	46	147			54.2	35	25.38	0.11	0.25
498239	GEOROC	ORDONEZ-CALDERON, J. C.; POLAT, A.; FRYER, B. J.; APPEL, P. W. U.; VAN GOOL, J. A. M.; DILEK, Y.; GAGNON, J. E., 2009	64.8827	-50.2181	IGNEOUS	VOLCANIC	NOT-GIVEN	3070	0	53.7	0.33	15.83		10.57			0.14	10.85	7.17	1.33	0.02	0.04	0.44	1.88	3.71	0.43	1.94	0.57	0.28	1.16	0.24	1.85	0.44	1.41	0.21	1.55	0.25	45	232	379	50	125			22	27	18.07	0.03	0.23
498240	GEOROC	ORDONEZ-CALDERON, J. C.; POLAT, A.; FRYER, B. J.; APPEL, P. W. U.; VAN GOOL, J. A. M.; DILEK, Y.; GAGNON, J. E., 2009	64.8827	-50.2181	IGNEOUS	VOLCANIC	NOT-GIVEN	3070	0	47.5	0.11	4.3		8.32			0.11	39.14	0.49	0.05		0.02	3.24	0.16	0.42	0.05	0.26	0.07	0.01	0.19	0.04	0.38	0.1	0.32	0.05	0.33	0.05	12	74	6312	113	2212			6.17	7	0.65	0.02	0.04
498241	GEOROC	ORDONEZ-CALDERON, J. C.; POLAT, A.; FRYER, B. J.; APPEL, P. W. U.; VAN GOOL, J. A. M.; DILEK, Y.; GAGNON, J. E., 2009	64.8819	-50.2181	IGNEOUS	VOLCANIC	THOLEIITE	3070	0	54.8	0.45	16.27		11.68			0.14	7.36	7.72	1.5	0.02	0.04		1.5	4.3	0.7	3.15	0.92	0.26	1.71	0.36	2.72	0.62	2.03	0.3	2.05	0.32	52	292	37	50	59			23	30	11.62	0.04	0.2
498244	GEOROC	ORDONEZ-CALDERON, J. C.; POLAT, A.; FRYER, B. J.; APPEL, P. W. U.; VAN GOOL, J. A. M.; DILEK, Y.; GAGNON, J. E., 2009	64.8786	-50.2202	IGNEOUS	VOLCANIC	THOLEIITE	3070	0	50.1	0.66	15.87		11.31			0.2	5.55	13.63	2.62	0.06	0.05	2.87	1.45	3.91	0.61	3.22	1.32	0.6	2.26	0.47	3.17	0.73	2.24	0.33	2.3	0.35	47	234	238	58	161			36.9	30	13.9	0.03	0.48
498248	GEOROC	ORDONEZ-CALDERON, J. C.; POLAT, A.; FRYER, B. J.; APPEL, P. W. U.; VAN GOOL, J. A. M.; DILEK, Y.; GAGNON, J. E., 2009	64.9007	-50.2171	IGNEOUS	VOLCANIC	NOT-GIVEN	3070	0	52	0.33	14.63		10.81			0.17	13.06	7.32	1.63	0.04	0.03	1.48	1.78	3.75	0.48	2.18	0.68	0.34	1.04	0.23	1.87	0.44	1.4	0.2	1.48	0.23	41	233	765	57	178			20.3	26	28.51	0.02	0.16
498259	GEOROC	ORDONEZ-CALDERON, J. C.; POLAT, A.; FRYER, B. J.; APPEL, P. W. U.; VAN GOOL, J. A. M.; DILEK, Y.; GAGNON, J. E., 2009	64.918	-50.2053	IGNEOUS	VOLCANIC	THOLEIITE	3070	0	52.5	1	13.57		13.23			0.2	6.84	11.08	1.23	0.3	0.08	0.58	3.5	9.19	1.35	6.87	2.16	0.82	3.26	0.59	3.68	0.78	2.42	0.36	2.39	0.36	51	307	211	47	79			53.2	33	28.83	0.15	0.13
498260	GEOROC	ORDONEZ-CALDERON, J. C.; POLAT, A.; FRYER, B. J.; APPEL, P. W. U.; VAN GOOL, J. A. M.; DILEK, Y.; GAGNON, J. E., 2009	64.9024	-50.2333	IGNEOUS	VOLCANIC	THOLEIITE	3070	0	49	1.01	15.62		12.5			0.2	8.29	10.81	2.39	0.14	0.08	0.28	2.55	7.31	1.15	6.17	1.99	0.68	3.12	0.53	3.59	0.76	2.26	0.33	2.07	0.33	42	264	251	51	166			57.3	37	41.61	0.12	0.08
498261	GEOROC	ORDONEZ-CALDERON, J. C.; POLAT, A.; FRYER, B. J.; APPEL, P. W. U.; VAN GOOL, J. A. M.; DILEK, Y.; GAGNON, J. E., 2009	64.8969	-50.2609	IGNEOUS	VOLCANIC	THOLEIITE	3070	0	50.5	1.2	15.54		12.75			0.2	6.33	10.41	2.51	0.41	0.1	0.07	3.37	9.57	1.53	7.75	2.53	0.97	3.65	0.62	4.29	0.94	2.69	0.39	2.5	0.38	45	323	219	45	100			67.2	55	173.98	0.17	0.11
498264	GEOROC	ORDONEZ-CALDERON, J. C.; POLAT, A.; FRYER, B. J.; APPEL, P. W. U.; VAN GOOL, J. A. M.; DILEK, Y.; GAGNON, J. E., 2009	64.8967	-50.263	IGNEOUS	VOLCANIC	NOT-GIVEN	3070	0	50.9	0.26	18.61		6.86			0.13	10.84	9.47	2.63	0.23	0.04	1.5	3.33	6.12	0.83	3.61	0.86	0.36	1.08	0.17	1.19	0.27	0.84	0.13	0.87	0.14	27	124	99	44	167			28.6	28	27.69	0.04	0.1
498265	GEOROC	ORDONEZ-CALDERON, J. C.; POLAT, A.; FRYER, B. J.; APPEL, P. W. U.; VAN GOOL, J. A. M.; DILEK, Y.; GAGNON, J. E., 2009	64.8964	-50.2526	IGNEOUS	VOLCANIC	THOLEIITE	3070	0	49	1	15.55		13.37			0.19	9.34	9.09	2.16	0.18	0.07	1.37	2.42	7.18	1.11	6.06	2.08	0.8	3.09	0.54	3.58	0.8	2.25	0.33	2.23	0.32	41	277	238	48	155			55.4	36	38	0.13	0.13
498271	GEOROC	ORDONEZ-CALDERON, J. C.; POLAT, A.; FRYER, B. J.; APPEL, P. W. U.; VAN GOOL, J. A. M.; DILEK, Y.; GAGNON, J. E., 2009	64.858	-49.9948	IGNEOUS	VOLCANIC	THOLEIITE	3070	0	47.9	0.7	14.6		12.67			0.2	11.2	10.17	1.9	0.61	0.05	1.78	2.91	7.23	1.07	5.35	1.61	0.62	2.16	0.39	2.61	0.57	1.56	0.23	1.58	0.22	28	206	196	68	433			44.9	32	57.91	0.08	0.11
498273	GEOROC	ORDONEZ-CALDERON, J. C.; POLAT, A.; FRYER, B. J.; APPEL, P. W. U.; VAN GOOL, J. A. M.; DILEK, Y.; GAGNON, J. E., 2009	64.8834	-49.9471	IGNEOUS	VOLCANIC	THOLEIITE	3070	0	52.5	0.61	13.55		10.08			0.2	7	14.3	1.56	0.19	0.04	0.58	1.91	5.29	0.81	4.18	1.42	0.54	2	0.35	2.37	0.53	1.53	0.21	1.4	0.22	35	227	603	48	120			35.3	29	35.85	0.06	0.12
498274	GEOROC	ORDONEZ-CALDERON, J. C.; POLAT, A.; FRYER, B. J.; APPEL, P. W. U.; VAN GOOL, J. A. M.; DILEK, Y.; GAGNON, J. E., 2009	64.8809	-49.9539	IGNEOUS	VOLCANIC	THOLEIITE	3070	0	50.5	0.76	15.3		12.14			0.19	7.99	11.24	1.63	0.18	0.06	1.5	2.58	7.06	1.04	5.53	1.66	0.6	2.59	0.43	3	0.63	1.78	0.27	1.73	0.27	38	237	244	50	156			45.2	34	46.44	0.09	0.07
498278	GEOROC	ORDONEZ-CALDERON, J. C.; POLAT, A.; FRYER, B. J.; APPEL, P. W. U.; VAN GOOL, J. A. M.; DILEK, Y.; GAGNON, J. E., 2009	64.89	-50.0291	IGNEOUS	VOLCANIC	THOLEIITE	3070	0	51.6	0.94	13.83		13.1			0.2	7.42	11.38	1.25	0.21	0.07	0.46	3.39	8.68	1.3	6.68	2.19	0.8	3.19	0.53	3.69	0.81	2.35	0.34	2.14	0.33	48	305	257	48	89			58.1	32	21.09	0.12	0.14
498281	GEOROC	ORDONEZ-CALDERON, J. C.; POLAT, A.; FRYER, B. J.; APPEL, P. W. U.; VAN GOOL, J. A. M.; DILEK, Y.; GAGNON, J. E., 2009	64.849	-49.9867	IGNEOUS	VOLCANIC	THOLEIITE	3070	0	49.2	1	14.7		13.11			0.21	7.13	11.88	2.41	0.26	0.08	0.53	3.21	8.82	1.31	7.02	2.37	0.81	3.19	0.57	3.79	0.83	2.4	0.35	2.26	0.33	39	282	187	52	135			57.1	38	43.51	0.14	0.99
498256B	GEOROC	ORDONEZ-CALDERON, J. C.; POLAT, A.; FRYER, B. J.; APPEL, P. W. U.; VAN GOOL, J. A. M.; DILEK, Y.; GAGNON, J. E., 2009	64.9164	-50.2065	IGNEOUS	VOLCANIC	THOLEIITE	3070	0	49.2	0.4	13.81		11.12			0.21	11.26	12.47	1.32	0.14	0.03	1.21	0.68	1.84	0.29	1.72	0.8	0.24	1.42	0.28	2.12	0.47	1.41	0.22	1.43	0.22	54	224	618	57	159			18.2	25	18.1	0.02	0.04
MU95-12	GEOROC	HOLLINGS, P.; KERRICH, R., 1999	59.42	-97.75	IGNEOUS	VOLCANIC	THOLEIITE	3000	0	51.87	0.73	13.23		13.74			0.2	8.02	7.63	3.93	0.61	0.05	1.27	2.03	5.24	0.75	3.88	1.47	0.59	2.31	0.42	2.81	0.62	1.74	0.25	1.6	0.23	48	456	111	75	102			39			0.08	0.06
MU95-16	GEOROC	HOLLINGS, P.; KERRICH, R., 1999	59.42	-97.75	IGNEOUS	VOLCANIC	BASALT	3000	0	50.28	1.04	14.88		14.78			0.25	6.56	10.47	0.89	0.79	0.07	0.71	3.29	9.04	1.31	6.84	2.4	0.85	3.2	0.57	3.9	0.83	2.42	0.37	2.43	0.35	52	375	300	68	96			50.73			0.19	0.07
MU95-18	GEOROC	HOLLINGS, P.; KERRICH, R., 1999	59.42	-97.75	IGNEOUS	VOLCANIC	BASALT	3000	0	49.23	0.82	16.31		13.23			0.18	7.91	8.55	3.49	0.21	0.06	0.76	2.67	7.46	1.08	5.28	1.91	0.72	2.51	0.47	3.26	0.71	1.95	0.32	1.91	0.28	45	292	240	63	141			45.06			0.16	0.05
MU95-21	GEOROC	HOLLINGS, P.; KERRICH, R., 1999	59.42	-97.75	IGNEOUS	VOLCANIC	BASALT	3000	0	50.8	1.01	14.35		14.56			0.17	8.11	7.75	2.94	0.21	0.09	0.7	3.46	10.04	1.48	8.07	2.46	0.91	3.07	0.55	3.87	0.81	2.56	0.4	2.67	0.4	54	338	314	68	91			66.78			0.22	0.07
MU95-28	GEOROC	HOLLINGS, P.; KERRICH, R., 1999	59.42	-97.75	IGNEOUS	VOLCANIC	BASALT	3000	0	49.54	0.92	15.32		13.89			0.2	7.61	8.93	3.33	0.17	0.07	0.5	3.14	8.6	1.31	6.78	2.19	0.79	3	0.54	3.99	0.79	2.38	0.34	2.31	0.33	48	329	266	69	132			51.19			0.18	0.06
MU95-5	GEOROC	HOLLINGS, P.; KERRICH, R., 1999	59.42	-97.75	IGNEOUS	VOLCANIC	ANDESITE	3000	0	54.37	0.46	10.25		12.11			0.19	13.13	7.41	1.58	0.45	0.05	0.91	5.86	12.42	1.47	6.18	1.61	0.49	1.9	0.32	2.26	0.49	1.49	0.22	1.38	0.22	41	217	984	68	186			53			0.21	0.6
MU95-6	GEOROC	HOLLINGS, P.; KERRICH, R., 1999	59.42	-97.75	IGNEOUS	VOLCANIC	THOLEIITE	3000	0	50.25	0.42	16.33		9.75			0.16	9.06	11.62	2.17	0.22	0.03	1.58	1.27	3.46	0.5	2.67	0.9	0.38	1.18	0.23	1.79	0.4	1.12	0.19	1.26	0.18	48	225	1048	52	103			27			0.07	0.04
MU95-8	GEOROC	HOLLINGS, P.; KERRICH, R., 1999	59.42	-97.75	IGNEOUS	VOLCANIC	THOLEIITE	3000	0	50.71	0.6	7.15		15.46			0.24	14.02	10.41	1.32	0.05	0.04	1.01	2.19	6.36	0.93	4.88	1.62	0.58	2.04	0.33	2.2	0.47	1.32	0.18	1.28	0.17	35	259	1259	78	307			37			0.12	0.14
MU96-2	GEOROC	HOLLINGS, P.; KERRICH, R., 1999	59.42	-97.75	IGNEOUS	VOLCANIC	BASALT	3000	0	47.58	0.98	15.18		14.15			0.17	8.51	10.36	2.38	0.64	0.06	1.21	2.63	7.31	1.08	5.36	1.8	0.69	2.26	0.44	2.9	0.66	1.8	0.27	1.87	0.24	45	298	230	70	133			45.74			0.13	0.05
MU96-20	GEOROC	HOLLINGS, P.; KERRICH, R., 1999	59.42	-97.75	IGNEOUS	VOLCANIC	THOLEIITE	3000	0	48.94	0.4	14.53		11.13			0.18	11.23	11.54	1.81	0.23	0.03	0.6	1.07	2.87	0.42	2.26	0.87	0.4	1.41	0.26	1.87	0.42	1.27	0.2	1.26	0.17	58	276	1061	74	202			23			0.07	0.08
MU96-21	GEOROC	HOLLINGS, P.; KERRICH, R., 1999	59.42	-97.75	IGNEOUS	VOLCANIC	THOLEIITE	3000	0	49.28	0.74	15.39		11.98			0.18	8.45	12.09	1.38	0.45	0.05	1.27	2.31	5.82	0.88	4.33	1.62	0.59	2.31	0.47	3.09	0.68	1.97	0.3	2.01	0.27	54	317	340	56	114			39			0.07	0.08
MU96-22	GEOROC	HOLLINGS, P.; KERRICH, R., 1999	59.42	-97.75	IGNEOUS	VOLCANIC	THOLEIITE	3000	0	52.12	0.81	15.11		15.11			0.47	4.09	8.16	1.11	2.98	0.05	1.06	2.79	6.5	0.93	4.75	1.53	0.55	2.27	0.41	2.83	0.64	1.87	0.26	1.74	0.25	50	339	452	76	226			42			0.1	0.24
MU96-23	GEOROC	HOLLINGS, P.; KERRICH, R., 1999	59.42	-97.75	IGNEOUS	VOLCANIC	THOLEIITE	3000	0	48.43	1.31	14.43		15.87			0.21	6.22	10.92	2.18	0.33	0.1	1.32	575	13.35	1.9	9.21	3.02	1.05	3.69	0.72	4.81	1.05	3	0.47	3	0.42	48	421	123	72	103			84			0.28	0.3
2019-01-01	GEOROC	NESBITT, H. W.; YOUNG, G. M.; BOSMAN, S. A.; LONGSTAFFE, F. J., 2009	52.5	-92.85	IGNEOUS	VOLCANIC	BASALT	3000	0	49.28	1.77	13.1		16.94			0.23	5.57	9.69	1.22	0.34	0.14	0.48	10.9	25.9	3.49	16.1	4.46	1.51	4.56	0.8	4.85	0.95	2.8	0.4	2.27	0.33
2019-01-02	GEOROC	NESBITT, H. W.; YOUNG, G. M.; BOSMAN, S. A.; LONGSTAFFE, F. J., 2009	52.5	-92.85	IGNEOUS	VOLCANIC	BASALT	3000	0	49.87	0.58	12.88		10.6			0.19	8.98	9.4	1.11	0.12	0.05	5.51	1.74	4.61	0.73	3.84	1.36	0.57	1.98	0.37	2.4	0.52	1.62	0.24	1.49	0.22
2019-01-03	GEOROC	NESBITT, H. W.; YOUNG, G. M.; BOSMAN, S. A.; LONGSTAFFE, F. J., 2009	52.5	-92.85	IGNEOUS	VOLCANIC	BASALT	3000	0	52.35	0.74	15.69		10.3			0.17	6.3	7.7	2.15	0.14	0.05	3.87	1.77	4.28	0.64	3.29	1.17	0.58	1.63	0.32	2.06	0.45	1.36	0.21	1.2	0.18
2019-01-04	GEOROC	NESBITT, H. W.; YOUNG, G. M.; BOSMAN, S. A.; LONGSTAFFE, F. J., 2009	52.5	-92.85	IGNEOUS	VOLCANIC	BASALT	3000	0	50.03	0.76	14.5		11.96			0.2	8.07	10.89	0.95	0.32	0.06	0.92	2.7	6.91	1.03	5.42	1.85	0.71	2.41	0.47	3.07	0.67	2.1	0.32	2.07	0.3
2019-01-06	GEOROC	NESBITT, H. W.; YOUNG, G. M.; BOSMAN, S. A.; LONGSTAFFE, F. J., 2009	52.5	-92.85	IGNEOUS	VOLCANIC	BASALT	3000	0	51.36	0.54	11.23		10.32			0.2	8.23	14.26	0.89	0.12	0.05	2.28	1.64	4.03	0.59	3.2	1.05	0.45	1.62	0.33	2.17	0.44	1.32	0.21	1.29	0.18
2019-02-01	GEOROC	NESBITT, H. W.; YOUNG, G. M.; BOSMAN, S. A.; LONGSTAFFE, F. J., 2009	52.5	-92.85	IGNEOUS	VOLCANIC	BASALT	3000	0	48.14	0.79	15.09		11.97			0.03	15.18	0.12	0.04	0.04	0.06	7.27	2.43	6.46	0.95	4.9	1.69	0.43	2.28	0.44	2.79	0.58	1.89	0.28	1.63	0.26
2019-02-02	GEOROC	NESBITT, H. W.; YOUNG, G. M.; BOSMAN, S. A.; LONGSTAFFE, F. J., 2009	52.5	-92.85	IGNEOUS	VOLCANIC	BASALT	3000	0	46.74	0.63	8.87		14.95			0.15	16.92	4.56	0.59	0.13	0.04	5.06	1.61	5.13	0.85	4.41	1.54	0.85	2.06	0.38	2.24	0.43	1.26	0.18	1.01	0.15
2019-02-03	GEOROC	NESBITT, H. W.; YOUNG, G. M.; BOSMAN, S. A.; LONGSTAFFE, F. J., 2009	52.5	-92.85	IGNEOUS	VOLCANIC	BASALT	3000	0	49.27	0.5	14.34		18.59			0.12	8.09	1.14	0.05	0.52	0.01	6.36	0.44	1.1	0.16	0.84	0.33	0.1	0.66	0.15	1.07	0.23	0.79	0.13	0.78	0.13
2019-02-04	GEOROC	NESBITT, H. W.; YOUNG, G. M.; BOSMAN, S. A.; LONGSTAFFE, F. J., 2009	52.5	-92.85	IGNEOUS	VOLCANIC	BASALT	3000	0	47.63	0.25	8.16		9.52			0.16	9.74	8.44	1.94	0.02	0.02	13.77	0.68	1.63	0.22	1.14	0.42	0.2	0.65	0.15	1.03	0.23	0.76	0.11	0.66	0.1
2019-02-05	GEOROC	NESBITT, H. W.; YOUNG, G. M.; BOSMAN, S. A.; LONGSTAFFE, F. J., 2009	52.5	-92.85	IGNEOUS	VOLCANIC	BASALT	3000	0	50.25	0.69	8.5		8.97			0.18	7.4	8.98		0.21	0.05	14.19	2.39	5.92	0.89	4.74	1.52	0.47	1.77	0.28	1.66	0.34	1	0.14	0.9	0.12
2019-02-06	GEOROC	NESBITT, H. W.; YOUNG, G. M.; BOSMAN, S. A.; LONGSTAFFE, F. J., 2009	52.5	-92.85	IGNEOUS	VOLCANIC	BASALT	3000	0	45.74	0.6	11.58		12.05			0.2	4.36	10.47	2.35	0.45	0.05	12.24	2.18	5.14	0.75	4	1.24	0.51	1.6	0.3	1.88	0.41	1.33	0.2	1.31	0.19
2019-02-07	GEOROC	NESBITT, H. W.; YOUNG, G. M.; BOSMAN, S. A.; LONGSTAFFE, F. J., 2009	52.5	-92.85	IGNEOUS	VOLCANIC	BASALT	3000	0	52.04	0.64	13.01		6.62			0.17	6.91	7.29	3.69	0.12	0.05	8.63	1.05	2.65	0.39	2.16	0.72	0.33	1.29	0.29	1.86	0.37	1.16	0.18	1.07	0.15
508064	GEOROC	POLAT, A.; APPEL, P. W. U.; FRYER, B. J., 2011	63	-49.5	IGNEOUS	VOLCANIC	BASALT	2970	0	52.1	0.94	14.5		12.8			0.28	6.6	10	2.1	0.63	0.07	0.56	6.59	15.64	1.82	7.36	2.03	0.74	2.79	0.48	3.27	0.72	2.13	0.31	2.04	0.3	39	264	188	47	121	138	87	70	46	123	0.14	0.12
508066	GEOROC	POLAT, A.; APPEL, P. W. U.; FRYER, B. J., 2011	63	-49.5	IGNEOUS	VOLCANIC	BASALT	2970	0	47.2	0.92	15.2		14.6			0.24	8.4	10.8	2.3	0.28	0.06	0.74	2.47	6.78	1.05	5.42	1.89	0.7	2.81	0.49	3.32	0.72	2.1	0.3	2.01	0.3	41	270	235	60	181	151	101	39	42	41	0.08	0.06
508069	GEOROC	POLAT, A.; APPEL, P. W. U.; FRYER, B. J., 2011	63	-49.5	IGNEOUS	VOLCANIC	BASALT	2970	0	47.6	0.99	15.3		14.2			0.22	8.5	10.8	2	0.22	0.07	0.53	2.3	6.22	1.02	5.45	1.92	0.7	2.87	0.51	3.45	0.75	2.19	0.32	2.12	0.31	43	285	209	58	163		48	41	42	39	0.09	0.02
508071	GEOROC	POLAT, A.; APPEL, P. W. U.; FRYER, B. J., 2011	63	-49.5	IGNEOUS	VOLCANIC	BASALT	2970	0	45.8	0.78	15.7		13.8			0.21	9.8	11.3	2	0.53	0.06	0.88	1.76	5.21	0.85	4.53	1.6	0.64	2.35	0.42	2.87	0.62	1.81	0.26	1.77	0.26	35	229	235	69	259		189	40	40	55	0.08	0.02
508073	GEOROC	POLAT, A.; APPEL, P. W. U.; FRYER, B. J., 2011	63	-49.5	IGNEOUS	VOLCANIC	BASALT	2970	0	47.5	0.93	15.3		14.2			0.22	8.6	10.1	2.6	0.46	0.07	0.63	3.94	9.73	1.28	5.84	1.84	0.66	2.56	0.46	3.09	0.66	1.96	0.28	1.9	0.29	38	263	256	59	197		92	36	45	67	0.1	0.06
508074	GEOROC	POLAT, A.; APPEL, P. W. U.; FRYER, B. J., 2011	63	-49.5	IGNEOUS	VOLCANIC	BASALT	2970	0	47.6	0.83	16.7		13.1			0.2	9	9.8	2.4	0.34	0.06	0.47	2.09	5.55	0.86	4.48	1.59	0.61	2.29	0.41	2.77	0.6	1.76	0.26	1.72	0.26	36	246	224	61	231		19	42	52	133	0.08	0.06
508075	GEOROC	POLAT, A.; APPEL, P. W. U.; FRYER, B. J., 2011	63	-49.5	IGNEOUS	VOLCANIC	BASALT	2970	0	46.5	1.23	16.5		14.2			0.25	6.2	12.8	2.1	0.16	0.09	0.54	2.56	7.9	1.33	7.32	2.68	0.88	3.99	0.72	4.91	1.06	3.18	0.46	3.03	0.45	46	336	253	65	187		85	72	46	23	0.12	0.02
508077	GEOROC	POLAT, A.; APPEL, P. W. U.; FRYER, B. J., 2011	63	-49.5	IGNEOUS	VOLCANIC	BASALT	2970	0	52.9	1.05	15.7		10.6			0.21	5.4	12.2	1.7	0.08	0.08	0.35	2.13	5.94	0.92	4.9	1.84	0.67	2.97	0.56	3.98	0.88	2.62	0.38	2.48	0.37	47	328	184	50	181		61	44	40	27	0.1	0.03
508078	GEOROC	POLAT, A.; APPEL, P. W. U.; FRYER, B. J., 2011	63	-49.5	IGNEOUS	VOLCANIC	BASALT	2970	0	48.9	1.26	13.6		15.8			0.24	7.6	10.1	2.1	0.29	0.09	0.47	3.63	9.88	1.51	7.84	2.66	0.92	3.9	0.7	4.79	1.04	3.09	0.45	2.96	0.45	51	356	186	48	98		67	48	43	19	0.13	0.05
508079	GEOROC	POLAT, A.; APPEL, P. W. U.; FRYER, B. J., 2011	63	-49.5	IGNEOUS	VOLCANIC	BASALT	2970	0	46.2	1.1	16.4		14.5			0.22	7.3	12.2	1.9	0.13	0.09	0.37	2.45	7.1	1.14	6.13	2.26	0.84	3.5	0.66	4.68	1.02	3.11	0.45	3.07	0.46	51	347	271	58	191		46	47	41	29	0.09	0.13
508946	GEOROC	POLAT, A.; APPEL, P. W. U.; FRYER, B. J., 2011	63	-49.5	IGNEOUS	VOLCANIC	BASALT	2970	0	48	1.11	14.5		13.5			0.22	6.3	13.1	2.6	0.6	0.08	0.22	3.51	8.62	1.34	6.79	2.24	0.76	3.11	0.55	3.57	0.77	2.3	0.34	2.27	0.34	41	313	209	45	159	51	34	58	29	52	0.15	0.31
508947	GEOROC	POLAT, A.; APPEL, P. W. U.; FRYER, B. J., 2011	63	-49.5	IGNEOUS	VOLCANIC	BASALT	2970	0	48.9	1.04	15		13.5			0.2	7	11.2	2.6	0.5	0.08	0.34	2.79	7.37	1.14	5.99	2.03	0.7	2.82	0.49	3.31	0.7	2.1	0.3	2.06	0.3	43	307	188	45	130	61	48	53	25	24	0.11	0.25
508948	GEOROC	POLAT, A.; APPEL, P. W. U.; FRYER, B. J., 2011	63	-49.5	IGNEOUS	VOLCANIC	BASALT	2970	0	47	0.79	16		11.6			0.18	10.2	10.8	2.9	0.42	0.05	0.96	1.83	5.1	0.8	4.23	1.48	0.54	2.11	0.37	2.48	0.53	1.6	0.23	1.52	0.23	31	228	228	55	364	46	50	38	23	16	0.08	0.14
508949	GEOROC	POLAT, A.; APPEL, P. W. U.; FRYER, B. J., 2011	63	-49.5	IGNEOUS	VOLCANIC	BASALT	2970	0	47.9	0.79	15.9		11.5			0.17	10.2	10.5	2.8	0.27	0.06	0.83	2.15	6.21	0.98	5.18	1.77	0.61	2.49	0.44	2.99	0.64	1.94	0.28	1.85	0.28	29	221	217	55	368	60	50	46	23	15	0.1	0.16
508951	GEOROC	POLAT, A.; APPEL, P. W. U.; FRYER, B. J., 2011	63	-49.5	IGNEOUS	VOLCANIC	BASALT	2970	0	49	0.9	14.9		12.3			0.19	7.8	12	2.4	0.35	0.07	0.46	3.05	6.88	1.12	5.7	1.82	0.65	2.58	0.44	2.94	0.62	1.87	0.26	1.77	0.27	39	273	269	51	204	66	50	46	26	32	0.1	0.09
508954	GEOROC	POLAT, A.; APPEL, P. W. U.; FRYER, B. J., 2011	63	-49.5	IGNEOUS	VOLCANIC	BASALT	2970	0	48.5	1.05	14.7		12.7			0.22	6.8	12.5	2.7	0.66	0.08	0.32	3.4	7.46	1.22	6.23	2.06	0.69	2.85	0.51	3.36	0.72	2.17	0.31	2.09	0.31	41	300	213	47	159	65	57	54	26	32	0.12	0.12
508958	GEOROC	POLAT, A.; APPEL, P. W. U.; FRYER, B. J., 2011	63	-49.5	IGNEOUS	VOLCANIC	BASALT	2970	0	49.4	1.07	15		13.1			0.2	7.5	10.8	2.4	0.38	0.08	0.51	2.75	7.36	1.15	5.96	2.04	0.72	2.87	0.5	3.32	0.72	2.16	0.32	2.1	0.31	42	309	219	48	174	59	61	56	26	21	0.12	0.07
508959	GEOROC	POLAT, A.; APPEL, P. W. U.; FRYER, B. J., 2011	63	-49.5	IGNEOUS	VOLCANIC	BASALT	2970	0	48.7	1.05	14.9		12.5			0.22	7.1	11.7	2.7	1.08	0.08	0.74	3.41	8.25	1.22	6.16	2.03	0.76	2.83	0.5	3.4	0.72	2.16	0.31	2.08	0.31	42	301	212	46	170	69	24	57	28	62	0.11	0.21
478810	GEOROC	POLAT, A.; APPEL, P. W. U.; FRYER, B. J.; WINDLEY, B. F.; FREI, R.; SAMSON, I. M.; HUANG, HUA, 2009	63.1361	-50.6192	IGNEOUS	VOLCANIC	BASALT	2970	0	47.7	0.94	14.4		13.8			0.23	6.7	13.1	2.3	0.7	0.08	0.28	3.67	9.51	1.43	7.19	2.35	0.74	3.14	0.55	3.74	0.8	2.4	0.35	2.33	0.35	40	283	221	54	120	90	10	59.2	17	39	0.1	0.26
478811	GEOROC	POLAT, A.; APPEL, P. W. U.; FRYER, B. J.; WINDLEY, B. F.; FREI, R.; SAMSON, I. M.; HUANG, HUA, 2009	63.1367	-50.6175	IGNEOUS	VOLCANIC	BASALT	2970	0	47.3	0.9	15.2		12.6			0.22	6.7	15.1	1.7	0.3	0.06	0.2	2.61	7.53	1.19	6.12	2.02	0.73	2.78	0.5	3.37	0.73	2.18	0.32	2.09	0.32	42	268	311	56	150	80	190	54.1	16	20	0.12	0.04
478812	GEOROC	POLAT, A.; APPEL, P. W. U.; FRYER, B. J.; WINDLEY, B. F.; FREI, R.; SAMSON, I. M.; HUANG, HUA, 2009	63.1358	-50.6175	IGNEOUS	VOLCANIC	BASALT	2970	0	51.6	0.85	15.6		9.9			0.18	6.1	12.2	2.9	0.6	0.11	0.3	4.9	11.09	1.57	7.56	2.25	0.76	2.82	0.48	3.22	0.67	1.97	0.28	1.81	0.27	41	265	271	47	80	80	30	58.2	17	83	0.11	0.2
478813	GEOROC	POLAT, A.; APPEL, P. W. U.; FRYER, B. J.; WINDLEY, B. F.; FREI, R.; SAMSON, I. M.; HUANG, HUA, 2009	63.1283	-50.6133	IGNEOUS	VOLCANIC	BASALT	2970	0	47.4	0.65	14.5		13.1			0.17	7	15.5	1.5	0.2	0.05	0.21	2.48	6	0.91	4.71	1.61	0.62	2.3	0.41	2.78	0.61	1.86	0.27	1.81	0.28	39	229	349	57	160	60	10	40.9	17	15	0.2	0.07
478857	GEOROC	POLAT, A.; APPEL, P. W. U.; FRYER, B. J.; WINDLEY, B. F.; FREI, R.; SAMSON, I. M.; HUANG, HUA, 2009	63.1258	-50.2969	IGNEOUS	VOLCANIC	BASALT	2970	0	48.8	0.9	14.8		13.9			0.19	8.2	11.4	1.6	0.3	0.07	1.08	2.53	6.99	1.09	5.72	2.02	0.72	2.89	0.52	3.5	0.76	2.29	0.34	2.2	0.33	39	254	243	54	121	91	61	53.6	16	36	0.12	0.1
478858	GEOROC	POLAT, A.; APPEL, P. W. U.; FRYER, B. J.; WINDLEY, B. F.; FREI, R.; SAMSON, I. M.; HUANG, HUA, 2009	63.1256	-50.2961	IGNEOUS	VOLCANIC	BASALT	2970	0	49.9	1.2	14.1		14.9			0.21	7.1	10.8	1.5	0.1	0.09	0.29	3.55	9.47	1.46	7.57	2.59	0.87	3.65	0.67	4.62	0.99	3.03	0.44	2.9	0.44	44	318	231	50	80	150	50	85.2	20	18	0.13	0.27
478859	GEOROC	POLAT, A.; APPEL, P. W. U.; FRYER, B. J.; WINDLEY, B. F.; FREI, R.; SAMSON, I. M.; HUANG, HUA, 2009	63.1256	-50.2919	IGNEOUS	VOLCANIC	BASALT	2970	0	49.8	0.99	14.2		13.9			0.18	7.9	11.3	1.4	0.2	0.08	0.55	2.97	8.09	1.24	6.47	2.26	0.79	3.28	0.59	3.96	0.86	2.59	0.38	2.48	0.38	41	280	231	50	101	161	261	63.4	18	15	0.11	0.08
478861	GEOROC	POLAT, A.; APPEL, P. W. U.; FRYER, B. J.; WINDLEY, B. F.; FREI, R.; SAMSON, I. M.; HUANG, HUA, 2009	63.1286	-50.2911	IGNEOUS	VOLCANIC	BASALT	2970	0	47.8	0.91	15.9		13.8			0.22	7.8	11.9	1.5	0.1	0.07	0.33	2.35	6.6	1.06	5.64	1.92	0.7	2.82	0.51	3.42	0.74	2.22	0.32	2.14	0.33	42	271	150	55	130	110	30	52.2	16	32	0.07	0.07
478862	GEOROC	POLAT, A.; APPEL, P. W. U.; FRYER, B. J.; WINDLEY, B. F.; FREI, R.; SAMSON, I. M.; HUANG, HUA, 2009	63.1261	-50.3003	IGNEOUS	VOLCANIC	BASALT	2970	0	48.7	0.97	14.9		13.8			0.2	8.3	11.3	1.5	0.2	0.08	0.54	2.75	7.45	1.16	6.03	2.09	0.71	2.96	0.53	3.6	0.78	2.37	0.35	2.24	0.34	41	277	241	52	121	90	50	61.3	18	34	0.11	0.09
478864	GEOROC	POLAT, A.; APPEL, P. W. U.; FRYER, B. J.; WINDLEY, B. F.; FREI, R.; SAMSON, I. M.; HUANG, HUA, 2009	63.1264	-50.3014	IGNEOUS	VOLCANIC	BASALT	2970	0	49.6	1.08	14.2		14.7			0.22	7.8	9.8	2	0.4	0.08	0.86	3.5	8.77	1.31	6.76	2.33	0.81	3.25	0.61	4.07	0.87	2.65	0.39	2.52	0.39	45	320	222	50	111	121	61	71.6	18	104	0.12	0.09
497101	GEOROC	POLAT, A.; APPEL, P. W. U.; FRYER, B. J.; WINDLEY, B. F.; FREI, R.; SAMSON, I. M.; HUANG, HUA, 2009	63.0216	-49.4649	IGNEOUS	VOLCANIC	BASALT	2970	0	51.5	0.86	16.5		12.9			0.18	4.3	11.5	1.9	0.2	0.04	1.36	1.74	5.88	0.68	3.82	1.42	0.47	2.21	0.4	2.74	0.6	1.87	0.27	1.8	0.28	44	321	339	76	285	1855	56	45.6	49	59	0.02	0.23
497102	GEOROC	POLAT, A.; APPEL, P. W. U.; FRYER, B. J.; WINDLEY, B. F.; FREI, R.; SAMSON, I. M.; HUANG, HUA, 2009	63.2164	-49.4649	IGNEOUS	VOLCANIC	BASALT	2970	0	52.4	0.87	17.7		12			0.19	4.6	8.7	3.3	0.2	0.05	2.4	2.6	6.31	0.97	5.09	1.81	0.6	2.65	0.48	3.25	0.71	2.13	0.31	2.09	0.32	48	291	348	67	266	139	79	60.4	56	129	0.09	0.22
497107	GEOROC	POLAT, A.; APPEL, P. W. U.; FRYER, B. J.; WINDLEY, B. F.; FREI, R.; SAMSON, I. M.; HUANG, HUA, 2009	63.0051	-49.4751	IGNEOUS	VOLCANIC	BASALT	2970	0	48.9	1.05	15.2		12.4			0.2	6.5	12.4	2.8	0.6	0.08	0.38	3.48	9.26	1.42	7.34	2.4	0.87	3.36	0.59	3.92	0.83	2.52	0.36	2.42	0.37	41	293	251	52	202	111	140	60.2	46	17	0.14	0.31
497109	GEOROC	POLAT, A.; APPEL, P. W. U.; FRYER, B. J.; WINDLEY, B. F.; FREI, R.; SAMSON, I. M.; HUANG, HUA, 2009	63.0234	-49.4691	IGNEOUS	VOLCANIC	BASALT	2970	0	48.4	0.73	15.9		12.9			0.19	7.8	12.1	1.9	0.1	0.05	0.62	1.74	4.79	0.73	3.87	1.41	0.55	2.1	0.39	2.67	0.58	1.77	0.26	1.76	0.26	41	252	246	60	241	111	41	35.2	45	40	0.07	0.08
497112	GEOROC	POLAT, A.; APPEL, P. W. U.; FRYER, B. J.; WINDLEY, B. F.; FREI, R.; SAMSON, I. M.; HUANG, HUA, 2009	63.021	-49.4672	IGNEOUS	VOLCANIC	BASALT	2970	0	49.2	1.37	14.2		17.6			0.25	10.6	4	1.9	0.8	0.1	2.61	3.47	8.77	1.31	6.85	2.35	0.71	3.46	0.63	4.32	0.97	3.02	0.44	3.05	0.46	48	350	190	63	155	2449	1499	75.9	61	72	0.15	0.28
497118	GEOROC	POLAT, A.; APPEL, P. W. U.; FRYER, B. J.; WINDLEY, B. F.; FREI, R.; SAMSON, I. M.; HUANG, HUA, 2009	63.0184	-49.4683	IGNEOUS	VOLCANIC	BASALT	2970	0	48.3	0.36	13.5		11.1			0.19	14.3	10.2	1.6	0.4	0.03	1.34	1.56	3.86	0.54	2.68	0.84	0.32	1.14	0.2	1.33	0.29	0.86	0.12	0.81	0.12	32	131	656	73	421	101	74	21.3	33	44	0.04	0.08
497119	GEOROC	POLAT, A.; APPEL, P. W. U.; FRYER, B. J.; WINDLEY, B. F.; FREI, R.; SAMSON, I. M.; HUANG, HUA, 2009	63.0186	-49.4675	IGNEOUS	VOLCANIC	BASALT	2970	0	52	1.73	15.2		15.1			0.22	3.9	8.6	2.8	0.3	0.16	0.06	9.83	23.55	3.13	14.19	3.65	1.31	4.23	0.69	4.42	0.92	2.75	0.39	2.59	0.39	44	475	92	45	102	174	22	89.1	66	115	0.22	0.36
497120	GEOROC	POLAT, A.; APPEL, P. W. U.; FRYER, B. J.; WINDLEY, B. F.; FREI, R.; SAMSON, I. M.; HUANG, HUA, 2009	63.0186	-49.4675	IGNEOUS	VOLCANIC	BASALT	2970	0	50.8	0.78	15.4		11.4			0.22	5.1	14.8	1.4	0.1	0.06	0.39	2.4	6.19	0.92	4.66	1.56	0.61	2.13	0.38	2.53	0.54	1.64	0.24	1.59	0.24	37	220	167	57	164	98	262	34.1	44	17	0.11	0.2
497122	GEOROC	POLAT, A.; APPEL, P. W. U.; FRYER, B. J.; WINDLEY, B. F.; FREI, R.; SAMSON, I. M.; HUANG, HUA, 2009	63.0199	-49.4667	IGNEOUS	VOLCANIC	BASALT	2970	0	48.3	1.26	15.3		15.4			0.22	5.7	10.5	3	0.1	0.11	0.28	4.95	12.77	1.82	9.14	2.93	1.01	3.98	0.69	4.62	1	3.05	0.44	2.98	0.45	40	290	182	58	189	159	14	74.2	49	16	0.18	0.15
497123	GEOROC	POLAT, A.; APPEL, P. W. U.; FRYER, B. J.; WINDLEY, B. F.; FREI, R.; SAMSON, I. M.; HUANG, HUA, 2009	63.0195	-49.4662	IGNEOUS	VOLCANIC	BASALT	2970	0	50.6	0.75	16.5		11.6			0.17	4.9	14.1	1.3	0.1	0.05	2.6	2.7	7.27	1.08	5.42	1.82	0.74	2.53	0.45	3.06	0.66	2	0.29	1.93	0.29	39	211	241	59	220	76	458	33.9	41	19	0.07	0.2
497124	GEOROC	POLAT, A.; APPEL, P. W. U.; FRYER, B. J.; WINDLEY, B. F.; FREI, R.; SAMSON, I. M.; HUANG, HUA, 2009	63.0195	-49.4662	IGNEOUS	VOLCANIC	BASALT	2970	0	47	0.77	16.1		11.8			0.26	6.8	15.1	1.8	0.4	0.06	2.55	2.13	5.54	0.87	4.56	1.62	0.59	2.37	0.42	2.9	0.64	1.94	0.28	1.91	0.29	39	242	247	60	232	441	56	35.9	54	97	0.08	0.18
497125	GEOROC	POLAT, A.; APPEL, P. W. U.; FRYER, B. J.; WINDLEY, B. F.; FREI, R.; SAMSON, I. M.; HUANG, HUA, 2009	63.0194	-49.4664	IGNEOUS	VOLCANIC	BASALT	2970	0	47	0.77	16.6		10.9			0.25	5.1	17.6	1.4	0.1	0.06	1.75	2.05	5.49	0.86	4.54	1.6	0.61	2.3	0.42	2.83	0.62	1.88	0.28	1.84	0.27	39	241	227	57	228	102	132	46.8	43	20	0.09	0.08
497131	GEOROC	POLAT, A.; APPEL, P. W. U.; FRYER, B. J.; WINDLEY, B. F.; FREI, R.; SAMSON, I. M.; HUANG, HUA, 2009	63.201	-49.2789	IGNEOUS	VOLCANIC	BASALT	2970	0	46.9	1.17	16.2		14.2			0.2	8	10.1	2.9	0.2	0.09	0.54	3.4	9.19	1.4	7.21	2.47	0.86	3.39	0.6	4.08	0.88	2.69	0.39	2.63	0.4	41	298	177	56	193	119	48	68.4	52	36	0.06	0.12
497132	GEOROC	POLAT, A.; APPEL, P. W. U.; FRYER, B. J.; WINDLEY, B. F.; FREI, R.; SAMSON, I. M.; HUANG, HUA, 2009	63.2025	-49.2805	IGNEOUS	VOLCANIC	BASALT	2970	0	47	0.53	17.4		10.5			0.17	9.6	12.1	2.4	0.3	0.04	0.94	1.35	3.7	0.58	3.06	1.09	0.45	1.58	0.29	1.95	0.42	1.28	0.18	1.23	0.19	33	185	223	57	245	114	63	29.3	43	39	0.06	0.17
497133	GEOROC	POLAT, A.; APPEL, P. W. U.; FRYER, B. J.; WINDLEY, B. F.; FREI, R.; SAMSON, I. M.; HUANG, HUA, 2009	63.1986	-49.2845	IGNEOUS	VOLCANIC	BASALT	2970	0	47.6	0.56	16.6		10.9			0.18	8.4	12.9	2.5	0.4	0.04	0.67	1.39	3.58	0.56	2.99	1.13	0.45	1.65	0.3	2.09	0.46	1.37	0.2	1.37	0.21	38	206	277	56	194	115	65	27.2	42	36	0.05	0.11
497134	GEOROC	POLAT, A.; APPEL, P. W. U.; FRYER, B. J.; WINDLEY, B. F.; FREI, R.; SAMSON, I. M.; HUANG, HUA, 2009	63.197	-49.2828	IGNEOUS	VOLCANIC	BASALT	2970	0	47.8	0.76	16.4		11.4			0.17	9.1	11.2	2.7	0.5	0.06	0.75	2.48	5.88	0.88	4.54	1.53	0.57	2.1	0.36	2.43	0.52	1.55	0.23	1.49	0.22	34	213	255	54	225	104	53	35.3	43	31	0.08	2.19
497141	GEOROC	POLAT, A.; APPEL, P. W. U.; FRYER, B. J.; WINDLEY, B. F.; FREI, R.; SAMSON, I. M.; HUANG, HUA, 2009	63.1235	-49.8218	IGNEOUS	VOLCANIC	BASALT	2970	0	47.9	0.73	15.5		11.6			0.2	7.7	13.1	2.4	0.8	0.06	0.56	2.27	5.61	0.91	4.76	1.63	0.6	2.32	0.41	2.75	0.6	1.81	0.27	1.8	0.27	37	229	230	54	209	106	12	23.1	42	30	0.12	0.58
497142	GEOROC	POLAT, A.; APPEL, P. W. U.; FRYER, B. J.; WINDLEY, B. F.; FREI, R.; SAMSON, I. M.; HUANG, HUA, 2009	63.1235	-49.8218	IGNEOUS	VOLCANIC	BASALT	2970	0	48.7	0.71	15.4		11.3			0.19	7.6	12.8	2.5	0.8	0.06	0.43	4.15	6.17	1.27	6.01	1.76	0.6	2.37	0.41	2.78	0.6	1.81	0.26	1.75	0.27	39	235	230	53	211	89	19	41.2	41	29	0.2	0.48
497147	GEOROC	POLAT, A.; APPEL, P. W. U.; FRYER, B. J.; WINDLEY, B. F.; FREI, R.; SAMSON, I. M.; HUANG, HUA, 2009	63.1146	-49.8223	IGNEOUS	VOLCANIC	BASALT	2970	0	50.1	0.67	15.4		10.7			0.2	8.1	11	3	0.8	0.06	0.73	5.17	10.65	1.35	5.98	1.71	0.59	2.24	0.4	2.64	0.56	1.71	0.25	1.66	0.25	37	221	252	50	178	124	66	33.2	50	66	0.25	0.84
142194	GEOROC	SMITHIES, R. H., 2002	-20.8	117.8	IGNEOUS	VOLCANIC	BASALT	2965	5	53.51	0.26	17.12		9.01			0.16	8.22	8.11	1.65	0.39	0.05	2.15	6.46	12.5	1.47	5.42	1.09	0.33	1.17	0.21	1.51	0.39	1.23	0.22	1.54	0.27	35	163	153		74			37		68	0.13	0.25
142359	GEOROC	SMITHIES, R. H., 2002	-20.8	117.8	IGNEOUS	VOLCANIC	BASALT	2965	5	52.69	0.24	17.67		8.48			0.17	8.64	7.41	2.68	0.09	0.04	2.48	5.16	10.28	1.23	4.58	0.91	0.24	0.98	0.19	1.4	0.38	1.19	0.21	1.52	0.26	42	157	680		125			33		80	0.12	0.2
142360	GEOROC	SMITHIES, R. H., 2002	-20.8	117.8	IGNEOUS	VOLCANIC	BASALT	2965	5	49.21	0.17	13.44		9.42			0.17	16.06	6.1	0.63	1.16	0.03	3.99	3.33	6.76	0.81	3.06	0.61	0.12	0.68	0.13	0.97	0.25	0.82	0.15	1.09	0.18	35	142	1452		338			23		188	0.04	0.18
142368	GEOROC	SMITHIES, R. H., 2002	-20.8	117.8	IGNEOUS	VOLCANIC	BASALT	2965	5	52.65	0.26	16.65		9.63			0.17	7.97	8.1	1.73	0.18	0.04	3.4	5.99	11.92	1.41	5.13	1.01	0.3	1.13	0.21	1.56	0.41	1.3	0.23	1.67	0.28	40	174	56		73			35		41	0.12	0.24
VB82	GEOROC	TURNER, SIMON P.; FODEN, J. D., 2001	-7.25	108.05	IGNEOUS	VOLCANIC	BASALT	2965	5	49.14	0.81	16.05		9.92			0.17	10.59	11.16	2.34	0.35	0.1		4.1	9.8		6.6	1.93	0.74		0.47					1.52	0.23	42	264	582		149			48		48	0.15	0.191
142193	GEOROC	SMITHIES, R. H., 2002	-20.8	117.8	IGNEOUS	VOLCANIC	BASALT	2962.5	7.5	54.12	0.28	17.42		8.85			0.15	7.78	8.02	1.74	0.37	0.05	1.65	6.15	12.56	1.53	5.69	1.14	0.34	1.23	0.23	1.59	0.41	1.32	0.23	1.66	0.29	37	168	124		71			41		57	0.2	0.28
142359	GEOROC	SMITHIES, R. H.; CHAMPION, D. C.; SUN, SHEN-SU, 2004	-20.8	117.8	IGNEOUS	VOLCANIC	BASALT	2960	10	52.69	0.24	17.67	0.56	8.48	7.13		0.17	8.64	7.41	2.68	0.09	0.04	2.48	5.16	10.28	1.23	4.58	0.91	0.24	0.98	0.19	1.4	0.38	1.19	0.21	1.52	0.26	42.76	157.56	680.19	54.04	125.12	50.01	11.33	33.1	10.2	80.44	0.12	0.2
142360	GEOROC	SMITHIES, R. H.; CHAMPION, D. C.; SUN, SHEN-SU, 2004	-20.8	117.8	IGNEOUS	VOLCANIC	BASALT	2960	10	49.21	0.17	13.44	1.4	9.42	7.22		0.17	16.06	6.1	0.63	1.16	0.03	3.99	3.33	6.76	0.81	3.06	0.61	0.12	0.68	0.13	0.97	0.25	0.82	0.15	1.09	0.18	35.22	142.75	1452.16	65.67	338.37	51.91	4.47	22.67	8.49	188.08	0.04	0.18
142368	GEOROC	SMITHIES, R. H.; CHAMPION, D. C.; SUN, SHEN-SU, 2004	-20.8	117.8	IGNEOUS	VOLCANIC	BASALT	2960	10	52.65	0.26	16.65	0.85	9.63	7.9		0.17	7.97	8.1	1.73	0.18	0.04	3.4	5.99	11.92	1.41	5.13	1.02	0.3	1.13	0.21	1.56	0.41	1.3	0.23	1.67	0.28	40.88	174.06	56.82	56.26	73.86	54.67	27.34	35.65	10.88	41.33	0.12	0.24
125-060	GEOROC	SMITHIES, R. H.; CHAMPION, D. C.; SUN, SHEN-SU, 2004	-20.8	117.8	IGNEOUS	VOLCANIC	BASALT	2960	10	54.46	1.04	12.96	11.44	11.44			0.17	4.91	7.57	4.7	0.42	0.1		19.65	38.27	4.63	17.79	3.8	1.21	3.8	0.57	3.22	0.64	1.64	0.24	1.54	0.23	28.78	208.66	149.26	50.3	119.84	73.64	101.6	123.39	17.78	121.91	0.47	1.32
142-193	GEOROC	SMITHIES, R. H.; CHAMPION, D. C.; SUN, SHEN-SU, 2004	-20.8	117.8	IGNEOUS	VOLCANIC	BASALT	2960	10	54.12	0.28	17.42	1.07	8.85	7		0.15	7.78	8.02	1.74	0.37	0.05	1.65	6.15	12.56	1.53	5.69	1.14	0.34	1.23	0.23	1.59	0.41	1.32	0.23	1.66	0.29	37.29	168.96	124.09	56.01	71.55	47.9	46.65	41.79	11.22	57.83	0.2	0.28
142-194	GEOROC	SMITHIES, R. H.; CHAMPION, D. C.; SUN, SHEN-SU, 2004	-20.8	117.8	IGNEOUS	VOLCANIC	BASALT	2960	10	53.51	0.26	17.12	0.79	9.01	7.4		0.16	8.22	8.11	1.65	0.39	0.05	2.15	6.46	12.5	1.47	5.42	1.09	0.33	1.17	0.21	1.51	0.39	1.23	0.22	1.54	0.27	35.64	163.38	153.63	58.86	74.67	49.05	17.72	37.61	10.66	68.38	0.13	0.25
142-270	GEOROC	SMITHIES, R. H.; CHAMPION, D. C.; SUN, SHEN-SU, 2004	-20.8	117.8	IGNEOUS	VOLCANIC	BASALT	2960	10	53.19	0.66	15.21	0.57	10.25	8.71		0.18	8	3.82	5.3	0.24	0.1	3.61	29.76	60.79	7.24	27.01	5.57	1.07	5.57	0.93	5.58	1.21	3.31	0.52	3.47	0.55	23.65	131.11	46.25	33.41	86.56	86.37	5.65	203.31	16.87	712.35	0.7	2.01
142-279	GEOROC	SMITHIES, R. H.; CHAMPION, D. C.; SUN, SHEN-SU, 2004	-20.8	117.8	IGNEOUS	VOLCANIC	BASALT	2960	10	54.65	0.47	12.43	1.17	9.94	7.89		0.15	8.66	7.72	2.38	1	0.06	2.95	10.1	19.12	2.25	8.55	1.91	0.59	2.11	0.37	2.31	0.51	1.41	0.23	1.53	0.24	28.98	159.78	549.59	46.86	127.91	48.34	54.19	64.47	12.33	461.47	0.27	0.96
142-280	GEOROC	SMITHIES, R. H.; CHAMPION, D. C.; SUN, SHEN-SU, 2004	-20.8	117.8	IGNEOUS	VOLCANIC	BASALT	2960	10	54.54	0.47	12.26	0.85	10.03	8.26		0.16	8.6	8.2	2.46	0.71	0.06	3.17	9.87	18.78	2.23	8.48	1.93	0.54	2.1	0.37	2.32	0.51	1.42	0.23	1.55	0.25	28.65	162.44	570.91	44.3	120.8	48.72	43.06	64.41	12.12	308.13	0.27	0.95
142-281	GEOROC	SMITHIES, R. H.; CHAMPION, D. C.; SUN, SHEN-SU, 2004	-20.8	117.8	IGNEOUS	VOLCANIC	BASALT	2960	10	53.99	0.48	12.6	1.09	10.09	8.1		0.16	8.65	8.17	2.2	1.07	0.06	2.96	13.35	25.67	3.04	11.38	2.44	0.69	2.59	0.44	2.69	0.59	1.65	0.27	1.78	0.28	26.32	151	152.08	35.75	65.51	51.72	45.93	87.62	14.61	661.25	0.33	1.31
142-282	GEOROC	SMITHIES, R. H.; CHAMPION, D. C.; SUN, SHEN-SU, 2004	-20.8	117.8	IGNEOUS	VOLCANIC	BASALT	2960	10	54.17	0.52	13.61	1.09	10.39	8.37		0.16	7.45	7.67	1.93	1.69	0.06	3.12	10.24	19.71	2.33	8.84	2	0.57	2.23	0.4	2.45	0.54	1.52	0.24	1.63	0.26	29.75	167.5	298.89	43	99.05	52.91	48.82	68.66	12.85	547.01	0.28	1.04
142-350	GEOROC	SMITHIES, R. H.; CHAMPION, D. C.; SUN, SHEN-SU, 2004	-20.8	117.8	IGNEOUS	VOLCANIC	BASALT	2960	10	54.49	1.05	13.35	2.51	11.58	8.16		0.17	5.3	7.53	3.29	1.57	0.11	1.87	19.36	37.72	4.6	17.67	3.82	1.2	3.75	0.57	3.23	0.63	1.63	0.24	1.53	0.23	20.24	202.94	135.68	60.21	112.93	74.42	107.6	124.77	17.95	891.24	0.56	1.34
GIR-029	GEOROC	BARLEY, M. E.; KERRICH, R.; REUDAVY, I.; XIE, QIANLI, 2000	-26.9333	118.667	IGNEOUS	VOLCANIC	BASALT	2950	50	48.71	1.09	9.02		13.67			0.16	17.74	7.66	1.81	0.06	0.09	3.95	8.12	17.48	2.34	10.59	3.03	0.86	3.35	0.54	3.46	0.7	1.88	0.27	1.58	0.23	39.59	298	1862	68	674			72.17			0.51
GIR-149	GEOROC	BARLEY, M. E.; KERRICH, R.; REUDAVY, I.; XIE, QIANLI, 2000	-26.9333	118.667	IGNEOUS	VOLCANIC	BASALT	2950	50	49.9	1.12	9.99		14.52			0.22	12.58	9.19	2.31	0.08	0.09	2.14	5.93	15.13	2.26	9.9	2.96	1.07	3.39	0.56	3.55	0.73	1.99	0.29	1.85	0.26	40.75	296	1246	57	481			85.81			0.26
R-283	GEOROC	BARLEY, M. E.; KERRICH, R.; REUDAVY, I.; XIE, QIANLI, 2000	-33.55	120.2	IGNEOUS	VOLCANIC	BASALT	2950	50	53.66	0.71	8.36		14.66			0.21	9.77	9.68	2.33	0.46	0.08	0.79	4.62	10.04	1.32	6.43	2.07	0.86	2.71	0.45	2.99	0.59	1.67	0.23	1.37	0.2	39.75	252	476	34	154			55.84			0.2
R-286	GEOROC	BARLEY, M. E.; KERRICH, R.; REUDAVY, I.; XIE, QIANLI, 2000	-33.55	120.2	IGNEOUS	VOLCANIC	BASALT	2950	50	53.41	0.51	5.64		12.26			0.22	15.29	11.11	1.11	0.28	0.05	1.13	2.33	6.14	0.96	4.85	1.53	0.6	1.85	0.29	1.96	0.4	1.22	0.16	0.95	0.13	45.6	228	2651	56	252			43.1			0.15
485489	GEOROC	ORDONEZ-CALDERON, J. C.; POLAT, A.; FRYER, B. J.; GAGNON, J. E., 2011	64.4082	-51.094	IGNEOUS	VOLCANIC	BASALT	2930	130	50.86	1.71	13.18		14.68			0.18	6.77	9.29	2.97	0.14	0.22	0.19	5.44	14.76	2.26	11.66	3.66	1.32	4.79	0.88	5.64	1.21	3.69	0.52	3.6	0.54	41.18	235.67	50.91	43.13	73			99.44		17.42	0.26	0.22
485490	GEOROC	ORDONEZ-CALDERON, J. C.; POLAT, A.; FRYER, B. J.; GAGNON, J. E., 2011	64.4086	-51.0936	IGNEOUS	VOLCANIC	BASALT	2930	130	49.83	1.87	14.28		14.23			0.19	7.74	8.68	2.66	0.29	0.22	0.45	8.14	22.44	3.1	14.51	4.36	1.09	5.62	0.97	6.41	1.33	3.94	0.59	3.8	0.59	41.5	223.79	50.28	47.38	91.1			118.42		98.47	0.29	0.54
485491	GEOROC	ORDONEZ-CALDERON, J. C.; POLAT, A.; FRYER, B. J.; GAGNON, J. E., 2011	64.4088	-51.0937	IGNEOUS	VOLCANIC	BASALT	2930	130	49.15	0.78	15.55		12.89			0.2	7.93	11.76	1.55	0.12	0.07	0.62	2.49	6.29	0.97	4.97	1.73	0.67	2.59	0.47	3.36	0.72	2.18	0.32	2.1	0.32	43.33	184.34	73.42	54.27	157.99			43.33		3.87	0.08	0.09
485494	GEOROC	ORDONEZ-CALDERON, J. C.; POLAT, A.; FRYER, B. J.; GAGNON, J. E., 2011	64.4089	-51.0943	IGNEOUS	VOLCANIC	BASALT	2930	130	49.06	2.3	14.22		15.1			0.21	5.58	10.11	2.58	0.51	0.32	0.18	10.61	28.88	4.09	19.44	5.71	1.87	7.24	1.23	7.87	1.67	4.96	0.71	4.63	0.69	37.27	223.35	15.75	37.87	59.22			150.1		174.49	0.41	1.8
485497	GEOROC	ORDONEZ-CALDERON, J. C.; POLAT, A.; FRYER, B. J.; GAGNON, J. E., 2011	64.4047	-51.0918	IGNEOUS	VOLCANIC	BASALT	2930	130	46.59	0.83	15.39		13.04			0.26	9.94	11.34	2.14	0.34	0.13	0.98	2.47	6.69	1.02	5.23	1.59	0.74	2.29	0.35	2.43	0.53	1.55	0.22	1.47	0.23	36.75	122.8	139.1	58.36	189.43			46.96		124.39	0.06	0.3
493108	GEOROC	ORDONEZ-CALDERON, J. C.; POLAT, A.; FRYER, B. J.; GAGNON, J. E., 2011	64.4081	-51.094	IGNEOUS	VOLCANIC	BASALT	2930	130	47.61	1.92	14.12		16.36			0.23	5.85	11.09	2.33	0.2	0.28	0.18	6.65	18.65	2.78	13.72	4.21	1.59	5.52	0.96	6.25	1.31	3.91	0.55	3.74	0.54	40.08	206.97	45.61	51.35	110.87			129.25		21.12	0.31	1.48
493109	GEOROC	ORDONEZ-CALDERON, J. C.; POLAT, A.; FRYER, B. J.; GAGNON, J. E., 2011	64.4081	-51.0943	IGNEOUS	VOLCANIC	BASALT	2930	130	48.75	1.76	13.65		16.13			0.23	6.67	10.16	2.24	0.14	0.26	0.12	3.67	11.88	2.05	10.96	3.73	1.26	5.04	0.86	5.75	1.18	3.54	0.51	3.23	0.49	41.13	202.64	51.93	48.13	97.52			114.37		31.75	0.27	0.37
493110	GEOROC	ORDONEZ-CALDERON, J. C.; POLAT, A.; FRYER, B. J.; GAGNON, J. E., 2011	64.4083	-51.0939	IGNEOUS	VOLCANIC	BASALT	2930	130	52.48	1.8	13.61		12.54			0.22	5.61	10.71	2.69	0.18	0.16	0.22	7.91	21.58	2.87	13.85	4.11	1.43	5.29	0.93	6.28	1.31	3.92	0.56	3.64	0.55	42.44	223.13	53.81	45.94	81.4			107.12		25.02	0.28	0.4
493111	GEOROC	ORDONEZ-CALDERON, J. C.; POLAT, A.; FRYER, B. J.; GAGNON, J. E., 2011	64.4037	-51.0938	IGNEOUS	VOLCANIC	BASALT	2930	130	51.47	1.15	15.46		12.17			0.19	6.84	9.84	2.47	0.21	0.19	0.65	5.7	13.93	2.13	10.4	3.2	1.2	4.27	0.75	5.12	1.09	3.21	0.48	3.12	0.5	34.34	121.06	96.16	35.78	93.96			60.6		39.42	0.15	0.48
493112	GEOROC	ORDONEZ-CALDERON, J. C.; POLAT, A.; FRYER, B. J.; GAGNON, J. E., 2011	64.4038	-51.0938	IGNEOUS	VOLCANIC	BASALT	2930	130	47.21	0.92	9.85		17.79			0.25	14.14	8.3	1.09	0.26	0.18	1.05	4.87	10.55	1.45	6.89	2.07	0.82	2.66	0.48	3.22	0.66	2.1	0.27	1.84	0.28	32.51	128.4	84.46	79.52	262.43			40.64		19.31	0.08	0.3
493114	GEOROC	ORDONEZ-CALDERON, J. C.; POLAT, A.; FRYER, B. J.; GAGNON, J. E., 2011	64.4041	-51.0933	IGNEOUS	VOLCANIC	BASALT	2930	130	52.97	1.37	13.31		14.76			0.21	5.81	9.09	1.97	0.27	0.24	0.34	7.18	23.43	3.6	18.97	6.42	1.38	8.95	1.55	10.78	2.3	7.16	1.02	6.87	0.99	42.37	148.14	25.4	34.38	59.41			101.9		20.25	0.26	0.47
493120	GEOROC	ORDONEZ-CALDERON, J. C.; POLAT, A.; FRYER, B. J.; GAGNON, J. E., 2011	64.4246	-51.015	IGNEOUS	VOLCANIC	BASALT	2930	130	53.76	1.67	13.66		11.96			0.34	4.74	12.95	0.62	0.07	0.23	0.27	11.38	27.33	3.87	17.8	5.06	1.65	6.63	1.12	7.23	1.54	4.53	0.64	4.18	0.64	37.18	347.48	83.97	45.98	71.84			149.71		16.86	0.39	0.39
493126	GEOROC	ORDONEZ-CALDERON, J. C.; POLAT, A.; FRYER, B. J.; GAGNON, J. E., 2011	64.4309	-51.0223	IGNEOUS	VOLCANIC	BASALT	2930	130	52.22	0.59	13.66		12.03			0.19	8.45	10.26	2.37	0.19	0.05	0.53	0.93	2.84	0.47	2.79	1.24	0.46	2.07	0.43	2.99	0.69	2.2	0.34	2.18	0.33	53.62	351.4	80.26	50.03	81.73			30.35		20.04	0.04	0.12
83330145	GEOROC	SUN, SHEN-SU; WALLACE, D. A.; HOATSON, D. M.; GLIKSON, A. Y.; KEAYS, R. R., 1991	-21.5	116.75	IGNEOUS	VOLCANIC	BASALT	2930	0	50.92	0.25	1.72	1.94		7.22		0.18	19.49	15.38	0.33	0.07	0.01	1.61					1.19										35	171	901		958	50	23	14	2	40
83330136	GEOROC	SUN, SHEN-SU; WALLACE, D. A.; HOATSON, D. M.; GLIKSON, A. Y.; KEAYS, R. R., 1991	-21.5	116.75	IGNEOUS	VOLCANIC	BASALT	2927.5	2.5	50.89	1	13.54	1.89		10.41		0.2	6.72	7.41	2.06	0.56	0.28	4.44	16	32		22	5.2										29	221	101		78	115	74	66	18	584
BA-10	GEOROC	FRALICK, P.; HOLLINGS, P.; METSARANTA, R.; HEAMAN, L. M., 2009	51.1	-92.6	IGNEOUS	VOLCANIC	BASALT	2900	0	49.7	0.89	14.73		13.58			0.19	7.49	9.84	3.05	0.45	0.07	0.65	2.88	7.75	1.27	5.98	2.13	0.72	2.85	0.5	3.46	0.75	2.24	0.37	2.36	0.33	38.31	367.21	379	58	125			54.35		71.34	0.19	0.04
BA-14	GEOROC	FRALICK, P.; HOLLINGS, P.; METSARANTA, R.; HEAMAN, L. M., 2009	51.1	-92.6	IGNEOUS	VOLCANIC	BASALT	2900	0	50.46	0.89	14.85		13.42			0.21	9.03	7.54	2.95	0.58	0.08	2.65	2.79	7.76	1.26	6.32	2.11	0.63	2.92	0.5	3.37	0.76	2.16	0.33	2.24	0.31	37.39	353.9	445	66	162			57.35		96.29	0.15	0.07
BA-17	GEOROC	FRALICK, P.; HOLLINGS, P.; METSARANTA, R.; HEAMAN, L. M., 2009	51.1	-92.6	IGNEOUS	VOLCANIC	BASALT	2900	0	49.99	0.77	15.86		11.86			0.18	8.39	10.28	2.14	0.46	0.07	3.05	3.16	8.06	1.2	5.78	1.82	0.63	2.45	0.43	2.82	0.63	1.93	0.29	1.87	0.26	36.86	308.89	355	115	141			53.99		93.99	0.36	0.12
BA-21	GEOROC	FRALICK, P.; HOLLINGS, P.; METSARANTA, R.; HEAMAN, L. M., 2009	51.1	-92.6	IGNEOUS	VOLCANIC	BASALT	2900	0	48.41	0.76	15.14		12.22			0.19	10.64	10.7	1.69	0.18	0.07	1.2	2.39	7.12	1.06	4.96	1.59	0.63	2.11	0.38	2.54	0.55	1.64	0.25	1.78	0.24	32.92	286.59	503	70	272			48.51		16.31	0.17	0.07
BA-22	GEOROC	FRALICK, P.; HOLLINGS, P.; METSARANTA, R.; HEAMAN, L. M., 2009	51.1	-92.6	IGNEOUS	VOLCANIC	BASALT	2900	0	48.42	1.3	6.94		16.59			0.23	12.58	13.18	0.55	0.12	0.09	1.25	7.44	20.59	2.96	13.46	3.6	0.99	4	0.55	3.49	0.62	1.79	0.24	1.49	0.2	37.19	344.3	1361	105	455			76.7		15.54	0.42	0.15
BA-24	GEOROC	FRALICK, P.; HOLLINGS, P.; METSARANTA, R.; HEAMAN, L. M., 2009	51.1	-92.6	IGNEOUS	VOLCANIC	BASALT	2900	0	48.51	0.65	15.56		12.65			0.18	8.81	10.91	1.91	0.75	0.06	0.65	2.81	7.57	1.07	4.93	1.52	0.65	2.13	0.38	2.63	0.57	1.81	0.27	1.8	0.26	32.13	272.88	232	68	191			40.99		138.56	0.14	0.12
BA-29	GEOROC	FRALICK, P.; HOLLINGS, P.; METSARANTA, R.; HEAMAN, L. M., 2009	51.1	-92.6	IGNEOUS	VOLCANIC	BASALT	2900	0	49.35	1.58	14.56		14.99			0.24	6.44	9.5	2.9	0.27	0.16	0.45	5.03	13.35	2.29	10.53	3.48	1.18	4.78	0.82	5.68	1.29	3.56	0.56	3.27	0.53	29.54	428.73	320	57	76			82.23		40.66	0.1	0.13
BA-32	GEOROC	FRALICK, P.; HOLLINGS, P.; METSARANTA, R.; HEAMAN, L. M., 2009	51.1	-92.6	IGNEOUS	VOLCANIC	BASALT	2900	0	50.25	0.93	14.82		15.43			0.23	6.87	9.74	1.52	0.13	0.08	2.3	4.11	10.72	1.55	7.77	2.32	0.79	2.97	0.53	3.57	0.79	2.38	0.37	2.39	0.33	37.88	360.36	251	73	89			54.88		15.83	0.22	0.05
BA-33	GEOROC	FRALICK, P.; HOLLINGS, P.; METSARANTA, R.; HEAMAN, L. M., 2009	51.1	-92.6	IGNEOUS	VOLCANIC	BASALT	2900	0	49.71	0.97	14.22		14.21			0.23	7.63	10.33	1.87	0.75	0.07	1	3.32	9.08	1.32	6.29	2.05	0.72	2.92	0.48	3.65	0.74	2.28	0.34	2.3	0.34	37.18	393.98	372	64	95			52.32		122.19	0.18	0.09
BA-5	GEOROC	FRALICK, P.; HOLLINGS, P.; METSARANTA, R.; HEAMAN, L. M., 2009	51.1	-92.6	IGNEOUS	VOLCANIC	BASALT	2900	0	49.96	0.85	4.31		15.77			0.22	15.55	12.81	0.36	0.12	0.05	2.65	3.61	9.5	1.47	7.08	2.31	0.69	2.72	0.4	2.39	0.45	1.18	0.18	0.99	0.13	48.93	344.94	908	113	533			42.76		16.26	1.59	0.08
BA-7	GEOROC	FRALICK, P.; HOLLINGS, P.; METSARANTA, R.; HEAMAN, L. M., 2009	51.1	-92.6	IGNEOUS	VOLCANIC	BASALT	2900	0	49.18	1.24	8.93		17.43			0.25	9.69	10.53	2.38	0.24	0.13	1.45	10.44	27.05	3.79	17.71	4.22	1.42	4.53	0.69	4.01	0.78	2.06	0.28	1.82	0.22	34.22	296.65	720	98	270			90.57		35.1	0.49	0.26
BA-8	GEOROC	FRALICK, P.; HOLLINGS, P.; METSARANTA, R.; HEAMAN, L. M., 2009	51.1	-92.6	IGNEOUS	VOLCANIC	BASALT	2900	0	49.24	0.77	15.84		13.41			0.18	7.92	9.85	2.2	0.52	0.06	0.85	3.32	8.94	1.34	6.3	1.83	0.76	2.55	0.45	3.09	0.69	2	0.3	2.07	0.3	36.96	316.1	320	62	139			46.37		54.65	0.15	0.11
WR14	GEOROC	MYERS, R. E.; CAWTHORN, R. G.; MCCARTHY, T. S.; ANHAEUSSER, C. R., 1987	-27	30	IGNEOUS	VOLCANIC	NOT-GIVEN	2900	0	52	0.91	13.4		11.2			0.2	3.2	7.8	2.9	0.17	0.19	7.3	23	42															12		29	83	50	156		37
102-98-617G	GEOROC	PARKS, JEN; LIN, SHOUFA; DAVIS, D. W.; YANG, XUEMING; CREASER, R. A.; CORKERY, M. T., 2014	53.8313	-94.2406	IGNEOUS	VOLCANIC	BASALT	2897	0	48.3947	1.44634	15.4826		14.2493			0.229334	4.0159	13.4339	2.222	0.38732	0.142697	1.22	9.91987	23.439	2.98105	13.7563	3.84426	1.33039	5.33614	0.977482	5.78535	1.21048	3.5062	0.553029	3.35877	0.484249	40	286.998	172.06	42.4845	71.8308	68.3957	13.5822	101.971		117.079	0.294555	0.375827
102-98-692	GEOROC	PARKS, JEN; LIN, SHOUFA; DAVIS, D. W.; YANG, XUEMING; CREASER, R. A.; CORKERY, M. T., 2014	53.8394	-94.2876	IGNEOUS	VOLCANIC	BASALT	2897	0	50.7663	1.74531	13.42		14.8921			0.332728	5.07159	9.44747	3.70034	0.443638	0.181488	0.69	9.42988	23.1944	3.06472	14.6847	4.2124	1.41561	5.4238	0.985049	6.344	1.36102	3.77625	0.573124	3.78713	0.569883	44	289.062	76.6315	36.6241	30.4658	129.846	35.4911	134.251		177.629	0.377006	0.522182
102-98-807	GEOROC	PARKS, JEN; LIN, SHOUFA; DAVIS, D. W.; YANG, XUEMING; CREASER, R. A.; CORKERY, M. T., 2014	53.8433	-94.2949	IGNEOUS	VOLCANIC	BASALT	2897	0	52.9376	1.6749	14.5521		13.8265			0.226746	3.47677	8.06208	4.69616	0.403104	0.161242	0.76	7.66002	20.6613	2.84923	13.7229	4.17562	1.26312	5.35332	0.975011	6.12106	1.28024	3.64544	0.54399	3.55971	0.539759	42	275.011	97.1846	35.4086	43.6812	111.304	20.2272	125.197		277.734	0.365835	0.512754
102-98-809	GEOROC	PARKS, JEN; LIN, SHOUFA; DAVIS, D. W.; YANG, XUEMING; CREASER, R. A.; CORKERY, M. T., 2014	53.846	-94.2965	IGNEOUS	VOLCANIC	BASALT	2897	0	51.8697	0.771889	15.3654		11.8991			0.206941	7.25327	8.99158	2.80405	0.755334	0.082776	1	9.26935	20.4195	2.40304	10.2035	2.46613	0.832583	2.95952	0.556248	3.52115	0.726768	2.12159	0.318088	2.12895	0.315357	39	179.275	119.712	44.2735	77.9689	76.5971	99.6034	81.0023		351.538	0.271885	0.843635
102-98-812	GEOROC	PARKS, JEN; LIN, SHOUFA; DAVIS, D. W.; YANG, XUEMING; CREASER, R. A.; CORKERY, M. T., 2014	53.856	-94.2387	IGNEOUS	VOLCANIC	BASALT	2897	0	52.0075	0.776076	15.418		11.8688			0.203849	7.26407	9.03353	2.77318	0.838162	0.082781	2.76	9.39942	19.4498	2.31689	9.76286	2.49621	0.838266	2.92815	0.539471	3.41186	0.716941	2.06965	0.315011	2.04892	0.312261	38	176.217	113.261	43.4331	80.8882	72.8803	95.0565	78.334		348.043	0.25742	0.699247
52-IL-98-02	GEOROC	PARKS, JEN; LIN, SHOUFA; DAVIS, D. W.; YANG, XUEMING; CREASER, R. A.; CORKERY, M. T., 2014	53.8441	-94.0814	IGNEOUS	VOLCANIC	BASALT	2897	0	51.5025	1.78226	13.6841		13.4033			0.274514	4.92877	11.2613	2.88032	0.114381	0.17677	3.38	11.3676	28.0123	3.66337	16.6819	4.71814	1.6668	6.5699	1.20066	6.95246	1.46331	4.20855	0.613508	3.97475	0.590308	42	333.624	76.7062	43.9319	36.9757	130.163	149.63	125.296		102.967	0.355639	0.454439
52-IL-98-08	GEOROC	PARKS, JEN; LIN, SHOUFA; DAVIS, D. W.; YANG, XUEMING; CREASER, R. A.; CORKERY, M. T., 2014	53.8422	-94.2898	IGNEOUS	VOLCANIC	BASALT	2897	0	48.6032	1.71559	15.0911		15.1417			0.379555	5.67814	9.41296	2.61134	1.12348	0.253036	1.6	9.02736	20.9588	2.89242	13.9261	4.32534	1.15019	5.16099	1.02252	6.37887	1.39592	3.96794	0.60892	3.8938	0.592345	42	286.731	100.534	30.6533	67	89	41	117.628		487	0.358373	0.54412
52-IL-98-10	GEOROC	PARKS, JEN; LIN, SHOUFA; DAVIS, D. W.; YANG, XUEMING; CREASER, R. A.; CORKERY, M. T., 2014	53.847	-94.3063	IGNEOUS	VOLCANIC	BASALT	2897	0	49.2739	1.46349	15.3712		13.8474			0.186132	5.49192	10.5543	2.51585	1.15566	0.132952	1.65	8.46652	18.9136	2.56475	12.2303	3.72271	1.11591	4.47849	0.873112	5.25633	1.12828	3.27016	0.512864	3.14828	0.498491	41	269.229	159.714	44.8864	70	77	66	95.3385		325	0.287265	0.408423
52-IL-98-11	GEOROC	PARKS, JEN; LIN, SHOUFA; DAVIS, D. W.; YANG, XUEMING; CREASER, R. A.; CORKERY, M. T., 2014	53.8436	-94.3015	IGNEOUS	VOLCANIC	BASALT	2897	0	52.0557	0.646511	13.7357		10.0952			0.218642	8.93399	8.9863	2.36426	2.90825	0.052306	4.09	6.71672	13.5875	1.62314	7.10094	1.97952	0.656035	2.26341	0.427253	2.62235	0.554662	1.62518	0.255053	1.53419	0.244176	36	174.774	403.581	41.5015	108	65	114	53.9317		816	0.165335	0.423819
52-IL-98-12	GEOROC	PARKS, JEN; LIN, SHOUFA; DAVIS, D. W.; YANG, XUEMING; CREASER, R. A.; CORKERY, M. T., 2014	53.8309	-94.2451	IGNEOUS	VOLCANIC	BASALT	2897	0	51.5468	0.673018	14.2286		12.2413			0.263266	10.3565	6.79164	3.37021	0.471215	0.061462	2.7	6.43355	13.209	1.62249	3.74205	1.26217	0.547065	2.25999	0.439093	2.68129	0.578545	1.65317	0.259947	1.56244	0.255832	38	184.893	516.39	50.1949	146	98	33	54.2088		144	0.177176	0.463427
52-IL-98-13	GEOROC	PARKS, JEN; LIN, SHOUFA; DAVIS, D. W.; YANG, XUEMING; CREASER, R. A.; CORKERY, M. T., 2014	53.8526	-94.1778	IGNEOUS	VOLCANIC	BASALT	2897	0	51.4486	1.75482	13.7024		15.0531			0.285596	5.25827	8.76379	3.31993	0.237138	0.175276	2.84	10.2852	22.7926	3.10826	15.1311	4.37393	1.42816	5.09481	0.984252	6.29009	1.33167	3.86323	0.605471	3.74288	0.583912	44	305.504	75.2749	42.0956	37	109	106	106.931		89	0.3656	0.505635
52-IL-98-25	GEOROC	PARKS, JEN; LIN, SHOUFA; DAVIS, D. W.; YANG, XUEMING; CREASER, R. A.; CORKERY, M. T., 2014	53.8616	-94.1633	IGNEOUS	VOLCANIC	BASALT	2897	0	53.2335	0.77401	14.7571		11.0398			0.20165	6.96609	10.1843	2.1489	0.621245	0.081474	2.08	9.80876	19.2626	2.31647	9.84593	2.59392	0.821499	2.83338	0.564597	3.37731	0.737436	2.13165	0.334507	2.03611	0.32745	38	191.87	109.747	41.7066	62	57	83	72.2278		162	0.29314	0.795325
52-IL-98-30	GEOROC	PARKS, JEN; LIN, SHOUFA; DAVIS, D. W.; YANG, XUEMING; CREASER, R. A.; CORKERY, M. T., 2014	53.8546	-94.0712	IGNEOUS	VOLCANIC	BASALT	2897	0	50.8772	1.71679	13.7009		15.2151			0.261069	4.73058	10.3175	2.86132	0.156642	0.156642	3.54	9.5029	21.0101	3.38342	15.0581	4.04744	1.49092	5.31784	0.971081	6.38179	1.32534	3.75598	0.571966	3.51928	0.549687	41	281.22	89.8042	42.5143	37	75	108	117.927		99	0.370966	0.506303
8679	GEOROC	PUCHTEL, I. S.; ZHURAVLEV, D. Z.; SAMSONOV, A. V.; ARNDT, N. T., 1993	57.03	120.72	IGNEOUS	VOLCANIC	BASALT	2871.5	-1.5	51.5	1.16	14.8				13.2	0.19	5.62	10.6	2.22	0.48	0.22	1.16				10.8	3.44											290	75	54	85			72
8676	GEOROC	PUCHTEL, I. S.; ZHURAVLEV, D. Z.; SAMSONOV, A. V.; ARNDT, N. T., 1993	57.03	120.72	IGNEOUS	VOLCANIC	BASALT	2870	0	52.7	0.94	13.7				12.9	0.19	6.85	10.4	1.46	0.68	0.18	1.37		8.07		6.66	2.27	0.816	3.05		3.58		2.23		2.15	0.497		265	200	60	145			57
86105	GEOROC	PUCHTEL, I. S.; ZHURAVLEV, D. Z.; SAMSONOV, A. V.; ARNDT, N. T., 1993	57.03	120.72	IGNEOUS	VOLCANIC	BASALT	2870	0	55	0.81	12.3				12.1	0.2	6.31	11.7	1.01	0.37	0.23	1.24																225	490	55	135			41
86181	GEOROC	PUCHTEL, I. S.; ZHURAVLEV, D. Z.; SAMSONOV, A. V.; ARNDT, N. T., 1993	57.03	120.72	IGNEOUS	VOLCANIC	BASALT	2870	0	50.8	0.69	14.4				11.4	0.19	8.34	12.1	1.7	0.19	0.19	2.04				3.41	1.37											255	395	50	140			37
86191	GEOROC	PUCHTEL, I. S.; ZHURAVLEV, D. Z.; SAMSONOV, A. V.; ARNDT, N. T., 1993	57.03	120.72	IGNEOUS	VOLCANIC	BASALT	2870	0	51.6	0.89	14.2				12.9	0.19	7.18	10.2	2.43	0.21	0.2	0.92																290	175	55	115			52
86196	GEOROC	PUCHTEL, I. S.; ZHURAVLEV, D. Z.; SAMSONOV, A. V.; ARNDT, N. T., 1993	57.03	120.72	IGNEOUS	VOLCANIC	BASALT	2870	0	48	0.67	12.6				12.4	0.19	10.9	13.7	1.07	0.23	0.24	0.89																205	945	60	260			36
86197	GEOROC	PUCHTEL, I. S.; ZHURAVLEV, D. Z.; SAMSONOV, A. V.; ARNDT, N. T., 1993	57.03	120.72	IGNEOUS	VOLCANIC	BASALT	2870	0	49.7	0.75	13.6				11.9	0.17	9.9	12	1.46	0.29	0.23	1.13																250	785	60	140			41
1月-31	GEOROC	PUCHTEL, I. S.; ZHURAVLEV, D. Z.; SAMSONOV, A. V.; ARNDT, N. T., 1993	57.03	120.72	IGNEOUS	VOLCANIC	BASALT	2870	0	49.4	0.91	14.9				11.5	0.18	8.23	11.1	2.17	1.38	0.23	0.72				7.09	2.33											250	315	50	130			50
1月-34	GEOROC	PUCHTEL, I. S.; ZHURAVLEV, D. Z.; SAMSONOV, A. V.; ARNDT, N. T., 1993	57.03	120.72	IGNEOUS	VOLCANIC	BASALT	2870	0	53.3	1.01	14.1				11.7	0.19	6.18	11.5	1.21	0.56	0.25	0.79				6.14	2.16											315	205	65	150			52
KAF87-15A	GEOROC	HOLLINGS, P.; KERRICH, R., 2004	51.4	-90	IGNEOUS	VOLCANIC	BASALT	2860	0	51.11	1.01	13.29		14.92			0.22	6.82	10.73	0.1	1.73	0.06	0.4	2.55	7.58	1.16	6.59	2.36	0.81	3.31	0.57	4.14	0.91	2.69	0.39	2.55	0.37	64	441	476	67	200			51		15	0.18	0.08
KAF87-15B	GEOROC	HOLLINGS, P.; KERRICH, R., 2004	51.4	-90	IGNEOUS	VOLCANIC	BASALT	2860	0	53.16	0.8	16.09		10.49			0.22	5.57	11	0.24	2.36	0.06	0.5	2.26	6.17	0.91	4.91	1.76	0.7	2.63	0.46	3.6	0.79	2.32	0.36	2.2	0.33	59	373	128	78	103			46		94	0.11	0.08
KAF87-15C	GEOROC	HOLLINGS, P.; KERRICH, R., 2004	51.4	-90	IGNEOUS	VOLCANIC	BASALT	2860	0	49.18	1.19	14.49		14.39			0.19	7.07	10.92	0.15	2.32	0.09	0.4	4.01	10.87	1.65	8.51	2.91	0.95	3.64	0.64	4.44	0.94	2.87	0.43	2.75	0.4	55	372	167	60	108			70		19	0.22	0.1
KAF87-18A	GEOROC	HOLLINGS, P.; KERRICH, R., 2004	51.4	-90	IGNEOUS	VOLCANIC	BASALT	2860	0	49.27	0.62	14.84		11.96			0.2	10.31	10.51	0.29	1.97	0.04	1.06	1.46	4.3	0.68	3.76	1.38	0.58	2.1	0.36	2.45	0.56	1.61	0.24	1.6	0.24	46	252	316	69	116			34		43	0.13	0.04
KAF89-35B	GEOROC	HOLLINGS, P.; KERRICH, R., 2004	51.4	-90	IGNEOUS	VOLCANIC	BASALT	2860	0	51.01	1.09	14.16		12.62			0.23	8.58	8.83	0.91	2.5	0.07	0.6	2.94	8.49	1.33	7.2	2.63	0.96	3.45	0.61	4.17	0.89	2.56	0.38	2.56	0.35	58	367	419	55	97			58		242	0.21	0.06
PL-10	GEOROC	HOLLINGS, P.; KERRICH, R., 2004	51.4	-90	IGNEOUS	VOLCANIC	BASALT	2860	0	49.3	0.85	15.36		13.7			0.22	7.28	10.9	0.05	2.28	0.07	3.9	2.93	7.95	1.19	6.21	1.98	0.75	2.85	0.49	3.44	0.68	1.97	0.31	2.05	0.3	42	298	306	45	115			49		25	0.16	0.06
PL-13A	GEOROC	HOLLINGS, P.; KERRICH, R., 2004	51.4	-90	IGNEOUS	VOLCANIC	BASALT	2860	0	50.4	0.89	14.5		13.37			0.21	5.97	11.01	0.2	3.38	0.07	1.73	3.42	9.12	1.26	6.83	2.12	0.83	2.63	0.44	3.3	0.72	2.19	0.32	2.16	0.33	41	313	279	50	106			53		77	0.15	0.07
PL-13B	GEOROC	HOLLINGS, P.; KERRICH, R., 2004	51.4	-90	IGNEOUS	VOLCANIC	BASALT	2860	0	46.02	0.87	13.73		13.41			0.29	6.25	16.31	0.36	2.69	0.06	7.64	3.91	9.84	1.33	7.03	2.18	0.7	2.8	0.46	3.49	0.73	2.22	0.31	2.1	0.3	45	336	267	49	105			47		324	0.13	0.09
PL-7	GEOROC	HOLLINGS, P.; KERRICH, R., 2004	51.4	-90	IGNEOUS	VOLCANIC	BASALT	2860	0	52.21	0.9	16.68		11.37			0.27	3.66	12.35	0.36	2.11	0.09	8.34	2.94	7.82	1.24	6.38	2.05	0.76	2.75	0.49	3.52	0.73	2.16	0.34	2.21	0.31	43	302	218	56	125			45		356	0.21	0.07
PL-8A	GEOROC	HOLLINGS, P.; KERRICH, R., 2004	51.4	-90	IGNEOUS	VOLCANIC	BASALT	2860	0	49.94	0.82	14.84		13.92			0.19	8.04	9.71	0.1	2.34	0.08	2.35	2.46	6.95	1.12	5.72	1.89	0.73	2.59	0.48	3.38	0.71	2.15	0.31	2.1	0.27	42	286	277	54	150			42		35	0.18	0.08
PL-8B	GEOROC	HOLLINGS, P.; KERRICH, R., 2004	51.4	-90	IGNEOUS	VOLCANIC	BASALT	2860	0	46.26	1.08	18.65		17.38			0.19	9.71	4.52	0.44	1.67	0.1	5.82	3	8.09	1.23	6.39	2.22	0.84	3.17	0.56	3.98	0.88	2.71	0.39	2.64	0.37	53	369	358	76	193			56		274	0.21	0.23
PL95-1	GEOROC	HOLLINGS, P.; KERRICH, R., 2004	51.4	-90	IGNEOUS	VOLCANIC	BASALT	2860	0	52.73	0.9	17.5		9.48			0.26	3.64	12.1	0.06	3.25	0.06	8.28	3.32	8.7	1.23	6.99	2.41	0.86	3.16	0.55	3.56	0.81	2.4	0.37	2.1	0.28	72	359	376	57	158			51		35	0.16	0.16
PL95-12A	GEOROC	HOLLINGS, P.; KERRICH, R., 2004	51.4	-90	IGNEOUS	VOLCANIC	BASALT	2860	0	47.35	0.62	15.5		11.84			0.23	6.33	17.28	0.09	0.71	0.04	3.25	1.41	3.89	0.6	3.3	1.49	0.53	1.97	0.37	2.42	0.56	1.74	0.27	1.63	0.26	81	348	481	50	147			34		12	0.07	0.05
PL95-12B	GEOROC	HOLLINGS, P.; KERRICH, R., 2004	51.4	-90	IGNEOUS	VOLCANIC	BASALT	2860	0	49.66	0.64	15.18		12.31			0.19	8.65	11.49	0.11	1.71	0.05	0.81	1.81	4.66	0.64	3.97	1.46	0.6	1.95	0.4	2.52	0.59	1.81	0.27	1.71	0.26	74	298	452	45	134			34		20	0.09	0.04
PL95-12C	GEOROC	HOLLINGS, P.; KERRICH, R., 2004	51.4	-90	IGNEOUS	VOLCANIC	BASALT	2860	0	49.65	0.8	15		13.48			0.2	8	11.15	0.09	1.57	0.06	0.91	2.84	7.49	1.01	5.67	1.93	0.76	2.45	0.47	3.18	0.69	2.07	0.32	1.97	0.31	59	325	343	50	134			48		15	0.12	0.06
PL95-13	GEOROC	HOLLINGS, P.; KERRICH, R., 2004	51.4	-90	IGNEOUS	VOLCANIC	BASALT	2860	0	47.36	0.87	15.48		14.15			0.26	7	13.12	0.19	1.51	0.07	1.21	2.72	7.37	1.07	6.08	2.02	0.76	2.77	0.49	3.29	0.72	2.04	0.35	2	0.31	62	359	351	60	179			49		38	0.13	0.05
PL95-14	GEOROC	HOLLINGS, P.; KERRICH, R., 2004	51.4	-90	IGNEOUS	VOLCANIC	BASALT	2860	0	47.72	0.89	15.84		14.2			0.19	8.18	10.63	0.14	2.15	0.06	1.11	2.6	7.39	1.06	5.82	1.97	0.78	2.83	0.53	3.46	0.79	2.3	0.34	2.05	0.31	58	348	343	55	167			48		31	0.14	0.05
PL95-15	GEOROC	HOLLINGS, P.; KERRICH, R., 2004	51.4	-90	IGNEOUS	VOLCANIC	BASALT	2860	0	48.94	0.69	15.46		12.8			0.19	8.36	11.16	0.18	2.16	0.05	0.45	1.72	5	0.71	4.22	1.44	0.57	2.03	0.37	2.54	0.6	1.67	0.24	1.52	0.24	52	286	250	56	170			37		18	0.1	0.02
PL95-2	GEOROC	HOLLINGS, P.; KERRICH, R., 2004	51.4	-90	IGNEOUS	VOLCANIC	BASALT	2860	0	54.48	1.08	16.88		10.51			0.29	3.15	10.12	0.48	2.94	0.09	6.05	4.02	10.3	1.39	8.37	2.83	1.02	3.38	0.62	3.8	0.84	2.47	0.35	1.96	0.31	76	364	248	52	113			65		139	0.2	0.12
PL95-23	GEOROC	HOLLINGS, P.; KERRICH, R., 2004	51.4	-90	IGNEOUS	VOLCANIC	BASALT	2860	0	49.29	0.61	14.92		12.19			0.19	10.51	10.61	0.05	1.58	0.04	3.09	1.5	4.24	0.61	3.59	1.33	0.5	1.95	0.37	2.59	0.58	1.69	0.27	1.8	0.26	67	318	565	54	209			32		27	0.09	0.09
PL95-24	GEOROC	HOLLINGS, P.; KERRICH, R., 2004	51.4	-90	IGNEOUS	VOLCANIC	BASALT	2860	0	48.89	0.67	15.17		12.51			0.19	8.12	12.61	0.15	1.64	0.04	0.86	2.08	5.6	0.81	4.79	1.72	0.61	2.37	0.45	2.82	0.62	1.91	0.27	1.84	0.28	76	306	486	52	112			39		18	0.13	0.11
PL95-35	GEOROC	HOLLINGS, P.; KERRICH, R., 2004	51.4	-90	IGNEOUS	VOLCANIC	BASALT	2860	0	50.73	1.42	13.56		16.37			0.22	5.78	10.05	0.05	1.72	0.11	0.91	4.93	12.81	1.75	9.66	3.27	1.03	4.2	0.74	4.46	1	2.91	0.46	2.72	0.41	80	428	164	51	35			79		13	0.27	0.18
PL95-36	GEOROC	HOLLINGS, P.; KERRICH, R., 2004	51.4	-90	IGNEOUS	VOLCANIC	BASALT	2860	0	49.35	0.83	15.98		12.92			0.18	8.58	9.61	0.48	2	0.07	0.91	2.43	6.43	0.92	5.19	2.03	0.74	2.74	0.48	3.18	0.73	1.99	0.29	2.02	0.3	71	314	270	52	157			51		151	0.14	0.1
PL95-37	GEOROC	HOLLINGS, P.; KERRICH, R., 2004	51.4	-90	IGNEOUS	VOLCANIC	BASALT	2860	0	49.58	0.57	17.11		10.18			0.13	8.38	11.27	0.2	0.04	0.04	0.6	2.24	5.5	0.72	4.38	1.42	0.63	1.96	0.33	1.89	0.44	1.44	0.22	1.22	0.19	56	215	431	50	134			33		33	0.16	0.06
PL95-39	GEOROC	HOLLINGS, P.; KERRICH, R., 2004	51.4	-90	IGNEOUS	VOLCANIC	BASALT	2860	0	49.03	1.22	14.25		13.65			0.16	8.75	8	1.22	3.62	0.09	0.4	5.1	13.17	1.83	9.83	3.18	1.11	4.09	0.7	4.42	0.97	2.76	0.43	2.44	0.4	65	347	304	45	107			79		404	0.27	0.15
PL95-5	GEOROC	HOLLINGS, P.; KERRICH, R., 2004	51.4	-90	IGNEOUS	VOLCANIC	BASALT	2860	0	48.83	0.83	14.62		13.91			0.22	7.18	11.57	0.36	2.42	0.06	0.86	3.09	7.62	1.1	6.63	2.11	0.78	3.04	0.52	3.63	0.81	2.39	0.36	2.34	0.33	69	344	288	54	132			49		94	0.23	0.16
PL95-6	GEOROC	HOLLINGS, P.; KERRICH, R., 2004	51.4	-90	IGNEOUS	VOLCANIC	BASALT	2860	0	47.08	0.89	15.69		14.98			0.23	7.38	10.39	0.4	2.89	0.07	0.55	2.17	6.32	0.9	5.51	2.02	0.68	2.49	0.48	3.26	0.72	2.07	0.33	1.98	0.31	77	324	326	54	134			51		52	0.12	0.05
PL95-7	GEOROC	HOLLINGS, P.; KERRICH, R., 2004	51.4	-90	IGNEOUS	VOLCANIC	BASALT	2860	0	48.15	0.89	15.33		14.72			0.16	9.22	8.32	0.18	2.95	0.07	1.42	2.29	5.83	0.82	4.17	2.13	0.62	2.31	0.42	2.89	0.65	2	0.3	1.73	0.27	57	324	253	45	102			50		73	0.15	0.13
PL95-8	GEOROC	HOLLINGS, P.; KERRICH, R., 2004	51.4	-90	IGNEOUS	VOLCANIC	BASALT	2860	0	48.09	0.9	15		14.7			0.17	9.19	9.58	0.17	2.12	0.07	1.27	2.96	7.32	1.04	5.33	1.99	0.73	3.05	0.46	2.9	0.66	2.07	0.31	1.85	0.25	66	343	299	54	120			51		44	0.16	0.13
52-IL-98-31	GEOROC	PARKS, JEN; LIN, SHOUFA; DAVIS, D. W.; YANG, XUEMING; CREASER, R. A.; CORKERY, M. T., 2014	53.7622	-94.2279	IGNEOUS	VOLCANIC	BASALT	2852	0	49.9052	1.0278	15.4591		13.2582			0.181129	6.92923	10.6992	2.28517	0.189553	0.084246	5.3	4.51485	10.7661	1.51345	7.45094	2.36955	1.1363	3.25166	0.60252	3.62454	0.76538	2.20156	0.334397	2.17148	0.334866	39	268.868	215.001	48.8083	131.096	92.8701	199.868	50.5309		45	0.176826	0.133899
52-IL-98-32	GEOROC	PARKS, JEN; LIN, SHOUFA; DAVIS, D. W.; YANG, XUEMING; CREASER, R. A.; CORKERY, M. T., 2014	53.7659	-94.1115	IGNEOUS	VOLCANIC	BASALT	2852	0	50.5881	1.03384	14.9195		14.1147			0.257945	6.84069	8.17169	3.95171	0.030953	0.09286	2.56	4.84563	10.7293	1.49424	7.29137	2.33312	0.800196	3.42702	0.66233	3.9153	0.861739	2.58047	0.38951	2.41386	0.384415	46	288.3	173.964	54.871	128.845	100.992	144.066	51.9621		53	0.157566	0.197654
52-IL-98-34	GEOROC	PARKS, JEN; LIN, SHOUFA; DAVIS, D. W.; YANG, XUEMING; CREASER, R. A.; CORKERY, M. T., 2014	53.7639	-94.5117	IGNEOUS	VOLCANIC	BASALT	2852	0	51.4995	1.06788	14.7822		13.1003			0.191489	5.68389	11.0638	2.06687	0.455927	0.081053	1.55	3.82184	9.4941	1.41223	7.38965	2.43309	0.995821	3.5204	0.666883	4.03128	0.866371	2.5707	0.388732	2.46964	0.390811	43	312.317	232.583	54.742	124.025	104.615	152.29	53.7683		78	0.170109	0.096671
52-IL-98-36	GEOROC	PARKS, JEN; LIN, SHOUFA; DAVIS, D. W.; YANG, XUEMING; CREASER, R. A.; CORKERY, M. T., 2014	53.7853	-94.5618	IGNEOUS	VOLCANIC	BASALT	2852	0	50.7001	0.63819	13.1595		11.2013			0.175528	9.99391	11.8506	1.87703	0.344968	0.060876	1.54	5.39812	11.3349	1.43055	6.33946	1.91744	0.690517	2.55942	0.482999	2.82037	0.615618	1.8221	0.26881	1.7034	0.266795	35	210.058	965.414	65.4502	280.154	82.8574	107.052	50.6229		85	0.18362	0.410832
52-IL-98-38	GEOROC	PARKS, JEN; LIN, SHOUFA; DAVIS, D. W.; YANG, XUEMING; CREASER, R. A.; CORKERY, M. T., 2014	53.9045	-94.7281	IGNEOUS	VOLCANIC	BASALT	2852	0	53.9821	0.621724	11.9412		10.8622			0.210667	7.92313	12.229	1.92169	0.246634	0.061658	2.08	6.92112	12.953	1.54109	6.47726	1.83018	0.648514	2.41651	0.43947	2.5702	0.558622	1.58303	0.238424	1.48067	0.222471	38	216.852	594.081	53.1538	137.676	75.1895	102.938	49.1107		98	0.212487	0.567724
52-IL-98-39	GEOROC	PARKS, JEN; LIN, SHOUFA; DAVIS, D. W.; YANG, XUEMING; CREASER, R. A.; CORKERY, M. T., 2014	53.9297	-94.7668	IGNEOUS	VOLCANIC	BASALT	2852	0	54.4516	0.652149	12.9863		11.4892			0.30169	8.21141	9.10741	2.71067	0.045366	0.056708	10.89	8.06774	15.1842	1.73355	7.16247	1.88102	0.569679	2.1239	0.414467	2.53776	0.540293	1.52035	0.241365	1.43038	0.226262	36	184.385	341.367	40.9561	117	59	71	56.397		6	0.232717	0.803736
52-IL-98-44	GEOROC	PARKS, JEN; LIN, SHOUFA; DAVIS, D. W.; YANG, XUEMING; CREASER, R. A.; CORKERY, M. T., 2014	53.7886	-94.5504	IGNEOUS	VOLCANIC	BASALT	2852	0	51.1977	0.6892	13.7231		11.5611			0.333942	8.47544	12.2107	1.39058	0.355258	0.060901	1.87	6.8036	12.9589	1.57743	7.82333	2.57963	0.702405	2.29879	0.447428	2.64403	0.581394	1.66084	0.260408	1.59171	0.254044	36	199.344	425.123	44.5033	131	49	84	46.245		97	0.151724	0.447529
52-IL-98-46	GEOROC	PARKS, JEN; LIN, SHOUFA; DAVIS, D. W.; YANG, XUEMING; CREASER, R. A.; CORKERY, M. T., 2014	53.8465	-94.7405	IGNEOUS	VOLCANIC	BASALT	2852	0	51.741	0.462575	15.1128		9.13918			0.20627	7.91382	13.6322	1.64403	0.071479	0.071479	1.78	1.91356	4.20762	0.573108	2.94056	1.01599	0.372539	1.54417	0.307753	1.9751	0.43616	1.33378	0.213576	1.34898	0.215144	48	221.063	415.586	40.4056	101.998	72.9985	9.93005	19.7664		13	0.075412	0.060275
52-IL-98-50	GEOROC	PARKS, JEN; LIN, SHOUFA; DAVIS, D. W.; YANG, XUEMING; CREASER, R. A.; CORKERY, M. T., 2014	53.8357	-94.7463	IGNEOUS	VOLCANIC	BASALT	2852	0	51.3984	0.450524	14.8276		10.7597			0.129157	8.15621	11.3292	2.18651	0.722058	0.050849	1.6	2.19797	5.11506	0.6662	3.15062	1.06222	0.549655	1.64987	0.32362	2.0748	0.455478	1.37997	0.217343	1.36505	0.208569	47	218.493	406.65	35.1968	76.4614	49.8206		20.9238		99	0.071135	0.143086
52-IL-98-53	GEOROC	PARKS, JEN; LIN, SHOUFA; DAVIS, D. W.; YANG, XUEMING; CREASER, R. A.; CORKERY, M. T., 2014	53.8414	-94.697	IGNEOUS	VOLCANIC	BASALT	2852	0	52.5593	0.477257	15.5083		8.73105			0.103796	7.74397	12.2316	2.43207	0.162817	0.040704	1.93	1.50698	3.81115	0.558202	2.95283	1.05338	0.452674	1.60682	0.328435	2.04811	0.448278	1.33057	0.203469	1.28758	0.200124	48	225.988	432.931	30.7104	101.216	60.3966		23.5316		23	0.061771	0.207915
JP00-31	GEOROC	PARKS, JEN; LIN, SHOUFA; DAVIS, D. W.; YANG, XUEMING; CREASER, R. A.; CORKERY, M. T., 2014	53.8603	-94.8059	IGNEOUS	VOLCANIC	BASALT	2852	0	49.9078	0.483309	15.2468		11.1612			0.183289	9.70715	11.6322	1.58714	0.051198	0.040958	1.95	1.11872	3.08658	0.473325	2.47806	0.880405	0.360065	1.4267	0.305546	1.89997	0.442669	1.31231	0.217368	1.38227	0.212573	47	224.61	435.205	44.8246	84	49	84	28.0424		25	0.060091	0.063318
JP00-33-G	GEOROC	PARKS, JEN; LIN, SHOUFA; DAVIS, D. W.; YANG, XUEMING; CREASER, R. A.; CORKERY, M. T., 2014	53.8524	-94.8016	IGNEOUS	VOLCANIC	BASALT	2852	0	53.4647	0.484658	14.8649		8.87015			0.166633	8.3926	11.1055	2.43853	0.162569	0.040642	1.57	1.68928	4.09933	0.572714	2.86069	0.974666	0.391912	1.34871	0.288717	1.87669	0.415808	1.24704	0.201705	1.26131	0.201651	46	212.537	412.319	48.9268	98	42	100	26.0554		48	0.063105	0.086413
JP01-105	GEOROC	PARKS, JEN; LIN, SHOUFA; DAVIS, D. W.; YANG, XUEMING; CREASER, R. A.; CORKERY, M. T., 2014	53.8308	-94.6653	IGNEOUS	VOLCANIC	BASALT	2852	0	51.7982	0.440025	14.3643		9.61498			0.181934	8.92744	12.3969	2.16839	0.08462	0.04231	4.63	0.881018	2.17494	0.322975	13.5093	2.19424	0.237079	1.07665	0.248001	1.6678	0.38933	1.17503	0.187424	1.21806	0.19012	44	188.554	403.281	42.5071	86	42		21.3718		3	0.046944	0.055803
KL5	GEOROC	ANHAEUSSER, C. R., 2001	-25.78	31.05	IGNEOUS	VOLCANIC	DIABASE	2850	150	54.49	0.35	14.57	1.18		5.9		0.15	7.74	8.95	2.33	1.42	0.14	2.22
SS15	GEOROC	ANHAEUSSER, C. R., 2001	-25.78	31.05	IGNEOUS	VOLCANIC	DIABASE	2850	150	49.98	0.2	12.77	7.31		0.89		0.15	14.41	7.49	1.58	1	0.09
1127A	GEOROC	MIL^KEVICH, R. I.; MYSKOVA, T. A.; GLEBOVITSKII, V. A.; L^VOV, A. B.; BEREZHNAYA, N. G., 2007	66.78	32	IGNEOUS	VOLCANIC	BASALT	2850	50	50.91	0.88	15.41	11.84				0.16	7.7	11.67	1.54	0.12			3.56	8.92		6.23	1.89	0.71		0.43					1.79	0.27	39.4	295	360	62	115			55			0.13
11月-35	GEOROC	MIL^KEVICH, R. I.; MYSKOVA, T. A.; GLEBOVITSKII, V. A.; L^VOV, A. B.; BEREZHNAYA, N. G., 2007	66.78	32	IGNEOUS	VOLCANIC	ANDESITE	2850	50	53.76	0.86	19.59	8.44				0.13	2.59	8.36	3.35	2.56	0.36																	216	129	27	34			115		545
12月-58	GEOROC	MIL^KEVICH, R. I.; MYSKOVA, T. A.; GLEBOVITSKII, V. A.; L^VOV, A. B.; BEREZHNAYA, N. G., 2007	66.78	32	IGNEOUS	VOLCANIC	BASALT	2850	50	47.7	1.12	16.12	13.74				0.32	6.27	10.19	2.53	1.67	0.34		18.3	39.9		27	5.89	1.82		0.92					2.66	0.34	27.3	295	119	25	35			102		480	0.18
1679/1	GEOROC	MIL^KEVICH, R. I.; MYSKOVA, T. A.; GLEBOVITSKII, V. A.; L^VOV, A. B.; BEREZHNAYA, N. G., 2007	66.78	32	IGNEOUS	VOLCANIC	BASALT	2850	50	48.27	1.19	17.08	11.89				0.29	6.84	12.23	2.09	0.29			3.13	9.2		5.97	2.45	0.92		0.62					2.32	0.37	34.8	250	271	57	94			65		179	0.16
1679/3	GEOROC	MIL^KEVICH, R. I.; MYSKOVA, T. A.; GLEBOVITSKII, V. A.; L^VOV, A. B.; BEREZHNAYA, N. G., 2007	66.78	32	IGNEOUS	VOLCANIC	BASALT	2850	50	54.8	2.47	13.51	13.62				0.25	4.06	8.71	2.58	0.24			9.03	26		18.6	5.61	1.7		1.1					3.93	0.58	37	453	79	48	26			149		191	0.49
1月-59	GEOROC	MIL^KEVICH, R. I.; MYSKOVA, T. A.; GLEBOVITSKII, V. A.; L^VOV, A. B.; BEREZHNAYA, N. G., 2007	66.78	32	IGNEOUS	VOLCANIC	BASALT	2850	50	48.31	1.13	15.93	13.08				0.24	5.62	9.94	3.89	1.53	0.34		15.1	33.8		20.2	4.88	1.4		0.77					2.56	0.36	26.3	295	89	37.5	31			84		532	0.23
1月-60	GEOROC	MIL^KEVICH, R. I.; MYSKOVA, T. A.; GLEBOVITSKII, V. A.; L^VOV, A. B.; BEREZHNAYA, N. G., 2007	66.78	32	IGNEOUS	VOLCANIC	BASALT	2850	50	48.33	0.75	13.09	12.51				0.24	11.19	11.26	1.3	1.08	0.24																	241	710	46	99			65		567
2月-43	GEOROC	MIL^KEVICH, R. I.; MYSKOVA, T. A.; GLEBOVITSKII, V. A.; L^VOV, A. B.; BEREZHNAYA, N. G., 2007	66.78	32	IGNEOUS	VOLCANIC	BASALT	2850	50	48.5	0.99	15.86	13.31				0.19	8.25	10.43	2.2	0.23	0.06		2.27	6.4		5.7	2.03	0.69		0.5					2	0.3	24.7	253	410	52	164			54			0.087
2月-74	GEOROC	MIL^KEVICH, R. I.; MYSKOVA, T. A.; GLEBOVITSKII, V. A.; L^VOV, A. B.; BEREZHNAYA, N. G., 2007	66.78	32	IGNEOUS	VOLCANIC	BASALT	2850	50	48.94	0.93	15.11	13.86				0.17	8.97	9.27	2.51	0.18	0.07																	272	398	43	142			54
35/10*	GEOROC	MIL^KEVICH, R. I.; MYSKOVA, T. A.; GLEBOVITSKII, V. A.; L^VOV, A. B.; BEREZHNAYA, N. G., 2007	66.78	32	IGNEOUS	VOLCANIC	BASALT	2850	50	47.05	1.04	14.45	14.32				0.28	8.17	10.87	2.71	0.81	0.29		14	36		25	5.43	1.55		0.8					2.4	0.32	38	279	295	32	116			77		288	0.16
35/12A	GEOROC	MIL^KEVICH, R. I.; MYSKOVA, T. A.; GLEBOVITSKII, V. A.; L^VOV, A. B.; BEREZHNAYA, N. G., 2007	66.78	32	IGNEOUS	VOLCANIC	BASALT	2850	50	45.9	0.74	12.2	12.34				0.22	11.63	14.62	1.25	0.89	0.2		11.3	27.8		17.5	3.99	1.2		0.53					1.39	0.2	31.2	188	1163	50	375			48		149	0.12
35/12B	GEOROC	MIL^KEVICH, R. I.; MYSKOVA, T. A.; GLEBOVITSKII, V. A.; L^VOV, A. B.; BEREZHNAYA, N. G., 2007	66.78	32	IGNEOUS	VOLCANIC	BASALT	2850	50	46.21	0.75	11.7	12.63				0.22	15.97	10.6	1.09	0.62	0.2																	223	1256	54	385			56		153
3月-43	GEOROC	MIL^KEVICH, R. I.; MYSKOVA, T. A.; GLEBOVITSKII, V. A.; L^VOV, A. B.; BEREZHNAYA, N. G., 2007	66.78	32	IGNEOUS	VOLCANIC	BASALT	2850	50	48.32	1.88	14.4	17.36				0.19	6.44	8.94	3.11	0.61	0.15		12.6	32		23.2	5.46	1.68		0.89					2.23	0.3	20.7	334	92	64	59			120			0.62
445/2	GEOROC	MIL^KEVICH, R. I.; MYSKOVA, T. A.; GLEBOVITSKII, V. A.; L^VOV, A. B.; BEREZHNAYA, N. G., 2007	66.78	32	IGNEOUS	VOLCANIC	BASALT	2850	50	49.18	2.01	13.09	17.9				0.35	4.11	9.77	2.61	0.75	0.22																	394	163	60	60			175
445/6	GEOROC	MIL^KEVICH, R. I.; MYSKOVA, T. A.; GLEBOVITSKII, V. A.; L^VOV, A. B.; BEREZHNAYA, N. G., 2007	66.78	32	IGNEOUS	VOLCANIC	BASALT	2850	50	48.77	1.08	14.22	15.46				0.27	6.98	11.15	1.68	0.32	0.07		2.23	7.2		5.8	1.98	0.66		0.52					2.34	0.36	36.9	309	305	64	106			65			0.062
447/1	GEOROC	MIL^KEVICH, R. I.; MYSKOVA, T. A.; GLEBOVITSKII, V. A.; L^VOV, A. B.; BEREZHNAYA, N. G., 2007	66.78	32	IGNEOUS	VOLCANIC	BASALT	2850	50	47.5	0.92	13.39	16.24				0.24	9.32	10.61	1.59	0.13	0.06		2.03	6.1		4.9	1.67	0.63		0.5					2.54	0.46	31.9	296	349	83	170			52
449/2	GEOROC	MIL^KEVICH, R. I.; MYSKOVA, T. A.; GLEBOVITSKII, V. A.; L^VOV, A. B.; BEREZHNAYA, N. G., 2007	66.78	32	IGNEOUS	VOLCANIC	BASALT	2850	50	46.86	2	11.46	19.34				0.25	6.23	10.2	2.35	0.44	0.17		9.4	20.1		10.8	3.29	1.17		0.58					2.38	0.33	39.44	560	95	63	56			81		307	0.3
449/3	GEOROC	MIL^KEVICH, R. I.; MYSKOVA, T. A.; GLEBOVITSKII, V. A.; L^VOV, A. B.; BEREZHNAYA, N. G., 2007	66.78	32	IGNEOUS	VOLCANIC	BASALT	2850	50	48.2	0.96	12.48	14.6				0.15	9.61	11.63	1.72	0.2	0.07		3	8.5		5.8	1.93	0.75		0.52					2.41	0.39	40.47	283	330	49	105			46		220	0.14
450/1A	GEOROC	MIL^KEVICH, R. I.; MYSKOVA, T. A.; GLEBOVITSKII, V. A.; L^VOV, A. B.; BEREZHNAYA, N. G., 2007	66.78	32	IGNEOUS	VOLCANIC	BASALT	2850	50	46.57	0.53	9.34	13.49				0.2	13.6	14.38	1.08	0.39			7.1	16.5		6.4	1.03	0.47		0.27					1.09	0.17	47.96	251	711	74	183			20		242	0.09
450/6A	GEOROC	MIL^KEVICH, R. I.; MYSKOVA, T. A.; GLEBOVITSKII, V. A.; L^VOV, A. B.; BEREZHNAYA, N. G., 2007	66.78	32	IGNEOUS	VOLCANIC	BASALT	2850	50	48.08	1.04	12.37	14.42				0.2	8.52	12.54	1.97	0.25	0.08		4.3	12		8.7	2.38	0.78		0.6					2.31	0.35	36.9	315	264	57	105			50		167	0.13
450/8	GEOROC	MIL^KEVICH, R. I.; MYSKOVA, T. A.; GLEBOVITSKII, V. A.; L^VOV, A. B.; BEREZHNAYA, N. G., 2007	66.78	32	IGNEOUS	VOLCANIC	BASALT	2850	50	48.77	1.11	12.19	15				0.2	9.14	11.38	1.88	0.15	0.08		3.6	9.3		6.5	2.02	0.85		0.48					2.13	0.33	41.63	332	278	52	106			52		100
4月-43	GEOROC	MIL^KEVICH, R. I.; MYSKOVA, T. A.; GLEBOVITSKII, V. A.; L^VOV, A. B.; BEREZHNAYA, N. G., 2007	66.78	32	IGNEOUS	VOLCANIC	BASALT	2850	50	54.65	1.88	16.16	11.04				0.15	3.88	8.27	5.26	0.25	0.19		16.9	42.7		31.7	6.89	1.99		1.1					3.95	0.4	25.3	396	60	73	55			153		284	0.77
58/4A	GEOROC	MIL^KEVICH, R. I.; MYSKOVA, T. A.; GLEBOVITSKII, V. A.; L^VOV, A. B.; BEREZHNAYA, N. G., 2007	66.78	32	IGNEOUS	VOLCANIC	BASALT	2850	50	48.02	0.94	14.31	14.4				0.22	8.72	11.32	1.74	0.24	0.07																	262	279	39	149			60
58/4B	GEOROC	MIL^KEVICH, R. I.; MYSKOVA, T. A.; GLEBOVITSKII, V. A.; L^VOV, A. B.; BEREZHNAYA, N. G., 2007	66.78	32	IGNEOUS	VOLCANIC	BASALT	2850	50	47.54	0.51	11.45	13.55				0.23	15.1	10.3	1.1	0.21																		158	1428	82	388			35
8月-35	GEOROC	MIL^KEVICH, R. I.; MYSKOVA, T. A.; GLEBOVITSKII, V. A.; L^VOV, A. B.; BEREZHNAYA, N. G., 2007	66.78	32	IGNEOUS	VOLCANIC	BASALT	2850	50	47.32	0.58	11.4	13.99				0.27	14.48	10.59	1.23	0.12	0.02		2.81	6.2		4.6	1.53	0.49		0.38					1.49	0.22	34.1	172	1718	59	463			42		49	0.086
8月-43	GEOROC	MIL^KEVICH, R. I.; MYSKOVA, T. A.; GLEBOVITSKII, V. A.; L^VOV, A. B.; BEREZHNAYA, N. G., 2007	66.78	32	IGNEOUS	VOLCANIC	BASALT	2850	50	46.86	0.38	8.11	13.62				0.23	17.46	11.42	1.02	0.04																		179	1862	59	405			27
9月-35	GEOROC	MIL^KEVICH, R. I.; MYSKOVA, T. A.; GLEBOVITSKII, V. A.; L^VOV, A. B.; BEREZHNAYA, N. G., 2007	66.78	32	IGNEOUS	VOLCANIC	BASALT	2850	50	49.07	0.99	14.02	14.79				0.23	7.52	11.23	1.94	0.16	0.07		3.4	8.9		6.7	2.71	0.98		0.56					2.68	0.42	46.6	304	291	51	148			60		15	0.15
82GRS-0035	GEOROC	HOLLINGS, P.; STOTT, G. M.; WYMAN, D. A., 2000	51	-91	IGNEOUS	VOLCANIC	THOLEIITE	2841	-1	47.51	0.74	16.01		11.62			0.18	8.48	13.66	1.55	0.19	0.04	0.4	3.73	8.87	1.29	6.2	1.81	0.64	2.28	0.42	2.88	0.61	1.81	0.27	1.71	0.26	34	211	358	50	133			36		39	0.18	0.07
82GRS-0139	GEOROC	HOLLINGS, P.; STOTT, G. M.; WYMAN, D. A., 2000	51	-91	IGNEOUS	VOLCANIC	THOLEIITE	2840	0	52.84	1.08	15.38		12.97			0.17	5.02	10.35	1.87	0.21	0.12	0.81	7.62	18.99	2.85	13.22	3.94	1.17	5.06	0.88	6.23	1.35	3.85	0.59	3.83	0.55	34	250	240	53	106			119		53	0.37	0.22
82GRS-1582	GEOROC	HOLLINGS, P.; STOTT, G. M.; WYMAN, D. A., 2000	51	-91	IGNEOUS	VOLCANIC	THOLEIITE	2840	0	49.94	0.64	15.06		11.93			0.21	6.8	13.55	1.57	0.27	0.02	0.5	1.91	4.89	0.78	4.01	1.43	0.51	1.87	0.35	2.3	0.52	1.43	0.23	1.46	0.21	42	243	194	61	135			31		47	0.11	0.05
84GRS-0047	GEOROC	HOLLINGS, P.; STOTT, G. M.; WYMAN, D. A., 2000	51	-91	IGNEOUS	VOLCANIC	THOLEIITE	2840	0	49.25	0.78	14.86		12.79			0.17	8.44	12.11	1.52	0.06	0.03	1.01	1.83	4.88	0.77	3.95	1.47	0.59	1.97	0.37	2.58	0.58	1.66	0.25	1.65	0.23	40	256	289	57	162			32		23	0.13	0.04
84GRS-0075	GEOROC	HOLLINGS, P.; STOTT, G. M.; WYMAN, D. A., 2000	51	-91	IGNEOUS	VOLCANIC	THOLEIITE	2840	0	48.97	1.11	16.02		14.05			0.18	7.45	9.38	2.65	0.11	0.07	1.42	3.46	9.22	1.41	6.7	2.16	0.79	2.84	0.53	3.63	0.8	2.31	0.36	2.25	0.33	49	355	197	64	112			58		116	0.21	0.09
84GRS-1056	GEOROC	HOLLINGS, P.; STOTT, G. M.; WYMAN, D. A., 2000	51	-91	IGNEOUS	VOLCANIC	THOLEIITE	2840	0	48.41	1.67	14.25		17.15			0.21	6.52	9	2.47	0.18	0.13	2.04	6.68	17.23	2.63	12.95	4.12	1.23	4.95	0.89	5.91	1.29	3.76	0.54	3.37	0.5	53	441	227	66	87			93		47	0.32	0.16
84GRS-1166	GEOROC	HOLLINGS, P.; STOTT, G. M.; WYMAN, D. A., 2000	51	-91	IGNEOUS	VOLCANIC	THOLEIITE	2840	0	48.67	0.62	15.62		11.5			0.16	9.36	12.37	1.57	0.11	0.02	1.21	2	5.19	0.77	4.01	1.39	0.56	1.81	0.34	2.44	0.53	1.46	0.23	1.53	0.2	39	233	410	61	189			34		45	0.14	0.17
84GRS-1225	GEOROC	HOLLINGS, P.; STOTT, G. M.; WYMAN, D. A., 2000	51	-91	IGNEOUS	VOLCANIC	THOLEIITE	2840	0	50.01	0.83	15.54		12.76			0.23	5.75	12.96	1.73	0.16	0.03	2.78	2.69	6.89	1.1	5.55	1.88	0.7	2.6	0.47	3.16	0.73	2.12	0.32	2.06	0.32	43	283	268	63	157			48		42	0.13	0.06
A1922	GEOROC	LEHTONEN, E.; K脛PYAHO, A., 2016	64	29	IGNEOUS	VOLCANIC	ANDESITE	2840	0	53.4	0.685	21.1				5.78	0.155	2.46	7.83	4.7	2.78	0.21		26.1	54.9	6.43	24.8	4.41	1.24	4.84	0.65	3.53	0.69	1.98	0.3	2.12	0.29		108						119			0.55	1.9
R06	GEOROC	MANYA, S.; MABOKO, M. A. H., 2003	-3.08	32.4	IGNEOUS	VOLCANIC	BASALT	2821.5	-1.5	50.5	0.93	17.3		12.2			0.29	4.09	11.3	2.94	0.18	0.12	0.8				5.56	1.76
R07	GEOROC	MANYA, S.; MABOKO, M. A. H., 2003	-3.08	32.4	IGNEOUS	VOLCANIC	BASALT	2820	0	49.7	0.94	15.9		12.9			0.28	4.56	13.4	1.93	0.16	0.14	1.1				5.52	1.79
R09	GEOROC	MANYA, S.; MABOKO, M. A. H., 2003	-3.08	32.4	IGNEOUS	VOLCANIC	BASALT	2820	0	48.8	1.13	15.1		15.3			0.31	4.57	12.7	1.66	0.4	0.13	0.8				8.65	2.71
R10	GEOROC	MANYA, S.; MABOKO, M. A. H., 2003	-3.08	32.4	IGNEOUS	VOLCANIC	BASALT	2820	0	47.6	1.32	14.8		15.2			0.26	6.53	11.6	2.36	0.17	0.12	1				10	3
R11	GEOROC	MANYA, S.; MABOKO, M. A. H., 2003	-3.08	32.4	IGNEOUS	VOLCANIC	BASALT	2820	0	49.7	1.11	14.6		13			0.18	7.01	11.2	2.81	0.21	0.12	0.7				6.12	1.92
R13	GEOROC	MANYA, S.; MABOKO, M. A. H., 2003	-3.08	32.4	IGNEOUS	VOLCANIC	BASALT	2820	0	49.1	0.56	16.2		11.3			0.18	9.09	11.7	1.68	0.1	0.09	2.3				3.42	1.24
R38	GEOROC	MANYA, S.; MABOKO, M. A. H., 2003	-3.08	32.4	IGNEOUS	VOLCANIC	BASALT	2820	0	49.6	0.72	16.4		10.3			0.24	6.64	13.8	2.09	0.17	0.07	1.4				4.92	1.65
R39	GEOROC	MANYA, S.; MABOKO, M. A. H., 2003	-3.08	32.4	IGNEOUS	VOLCANIC	BASALT	2820	0	49.1	0.74	16.8		9.61			0.18	8.44	13	2.03	0.07	0.09	0.8				5	1.64
R40	GEOROC	MANYA, S.; MABOKO, M. A. H., 2003	-3.08	32.4	IGNEOUS	VOLCANIC	BASALT	2820	0	48.8	1.23	14.5		14.2			0.23	5.97	12.7	1.76	0.51	0.1	0.6				10.1	3.16
R41	GEOROC	MANYA, S.; MABOKO, M. A. H., 2003	-3.08	32.4	IGNEOUS	VOLCANIC	BASALT	2820	0	48.9	1	16		12.7			0.23	7.62	9.5	3.16	0.92	0.09	1.5				6.7	5.56
R42	GEOROC	MANYA, S.; MABOKO, M. A. H., 2003	-3.08	32.4	IGNEOUS	VOLCANIC	BASALT	2820	0	48.5	0.76	18.3		10.1			0.18	6.06	13.1	2.46	0.43	0.03	0.7				4.6	1.57
BBS 13	GEOROC	CROW, C.; CONDIE, K. C., 1987	-26.87	26.72	IGNEOUS	VOLCANIC	ANDESITE	2800	0	52.8	1.23	15		12.5			5.87	3.43	3.94	1.22	0.17	0.38	3.24	29	67			7.5	2.1		0.98					2.6	0.38	26	264	30	62	94			196		879	0.34	0.4
BBS 16	GEOROC	CROW, C.; CONDIE, K. C., 1987	-26.87	26.72	IGNEOUS	VOLCANIC	ANDESITE	2800	0	52.8	0.83	14.2		11.6			7.39	5.71	5	0.61	0.18	0.2	2.34	10	26			3.5	1		0.52					1.3	0.2	23	247	636	43	202			103		362	0.16	0.5
BBS 4	GEOROC	CROW, C.; CONDIE, K. C., 1987	-26.87	26.72	IGNEOUS	VOLCANIC	ANDESITE	2800	0	53.1	0.99	14.1		10.9			6.01	8.43	3.7	0.86	0.15	0.16	2.26	10	26			3.1	0.96		0.5					1.4	0.22	20	181	295	42	264			117		295	0.27	0.1
BBS 5	GEOROC	CROW, C.; CONDIE, K. C., 1987	-26.87	26.72	IGNEOUS	VOLCANIC	ANDESITE	2800	0	53.7	1.01	13.8		11.1			6.47	6.93	3.72	1.11	0.15	0.15	2.34	12	29			3.5	1.2		0.64					1.7	0.27	25	189	366	53	274			117		570	0.35	2.2
BBS 9	GEOROC	CROW, C.; CONDIE, K. C., 1987	-26.87	26.72	IGNEOUS	VOLCANIC	ANDESITE	2800	0	53.9	0.54	15.3		9.2			7.94	5.05	4.99	1.13	0.15	0.13	2.43	8.3	20			2.6	0.58		0.37					1.1	0.17	23	187	556	47	276			82		490	0.17	1.9
BSF 11	GEOROC	CROW, C.; CONDIE, K. C., 1987	-26.87	26.72	IGNEOUS	VOLCANIC	ANDESITE	2800	0	53.2	1.18	14.8		11.9			5.18	5.9	4.23	1.22	0.17	0.37	2.13	19	47			5.9	1.5		0.8					1.7	0.27	19	262	22	39	119			189		770	0.28	0.4
BSF 12	GEOROC	CROW, C.; CONDIE, K. C., 1987	-26.87	26.72	IGNEOUS	VOLCANIC	BASALT	2800	0	50.6	0.83	13.9		12			7.88	8.11	3.63	0.94	0.17	0.2	2.16	11	27			3.6	1		0.5					1.4	0.22	24	237	675	48	344			104		674	0.16	2.2
BSF 2	GEOROC	CROW, C.; CONDIE, K. C., 1987	-26.87	26.72	IGNEOUS	VOLCANIC	ANDESITE	2800	0	52.8	1.13	14		12.5			3.45	5.45	3.93	0.59	0.16	0.26	5.62	30	67			6.2	2		0.77					2.4	0.35	26	322	10	50	24			193		198	0.28	3.1
BSF 3	GEOROC	CROW, C.; CONDIE, K. C., 1987	-26.87	26.72	IGNEOUS	VOLCANIC	BASALT	2800	0	50.5	0.66	13.8		10.7			8.85	8.76	2.27	1.77	0.2	0.14	2.8	13	30			3.4	1		0.54					1.6	0.24	32	192	933	65	390			89		774	0.16	2.2
BSF 9	GEOROC	CROW, C.; CONDIE, K. C., 1987	-26.87	26.72	IGNEOUS	VOLCANIC	ANDESITE	2800	0	54.4	1.15	14.5		11.5			4.92	6.33	4.34	0.53	0.17	0.36	1.93	23	54			6.5	2		0.83					2.2	0.33	22	249	25	44	98			182		505	0.26	3.2
BTF 2D	GEOROC	CROW, C.; CONDIE, K. C., 1987	-26.87	26.72	IGNEOUS	VOLCANIC	BASALT	2800	0	51.7	0.68	13.1		11			9.1	8.74	2.17	0.12	0.17	0.17	2.83	7.8	20			2.8	0.75		0.4					1	0.16	18	195	510	40	318			93		52	0.11	1.5
BTF 3	GEOROC	CROW, C.; CONDIE, K. C., 1987	-26.87	26.72	IGNEOUS	VOLCANIC	BASALT	2800	0	51.5	0.57	13.9		9.9			7.94	8.17	2.85	1.09	0.15	0.12	4.13	7.9	18			2.5	0.69		0.36					1	0.14	21	185	588	42	356			80		482	0.11	2.7
BTF 6	GEOROC	CROW, C.; CONDIE, K. C., 1987	-26.87	26.72	IGNEOUS	VOLCANIC	BASALT	2800	0	52.1	0.59	14.2		9.6			7.14	8.92	2.47	0.93	0.14	0.15	3.35	12	29			3.2	1.1		0.45					1.4	0.21	25	169	532	52	289			90		304	0.15	0.5
ML88-05	GEOROC	HOLLINGS, P.; KERRICH, R., 2006	51.242	-92.8238	IGNEOUS	VOLCANIC	BASALT	2800	0	49.57	0.92	15.61	14.03				0.23	7.67	8.58	3.27	0.05	0.07	3.35	5.04	12.32	1.74	8.1	2.44	0.85	3.23	0.55	3.75	0.86	2.43	0.37	2.42	0.36	36	278	244	56	131			58		32	0.22	0.2
ML88-10	GEOROC	HOLLINGS, P.; KERRICH, R., 2006	51.2613	-92.8072	IGNEOUS	VOLCANIC	BASALT	2800	0	48	1.11	17.19	14.38				0.19	8.05	10.76	0.22		0.11	6.3	6.18	13.7	2.02	9.61	2.54	0.97	3.32	0.51	3.55	0.8	2.28	0.37	2.34	0.35	41	289	204	76	193			74		5	0.27	0.28
ML88-11	GEOROC	HOLLINGS, P.; KERRICH, R., 2006	51.2609	-92.8216	IGNEOUS	VOLCANIC	BASALT	2800	0	50.36	0.69	11.59	12.45				0.21	13.43	8.38	2.24	0.4	0.25	5.8	7.93	17.39	2.45	11.29	2.95	0.84	3.01	0.48	2.88	0.65	1.79	0.27	1.76	0.24	32	241	1183	65	372			77		176	0.32	0.95
ML88-16	GEOROC	HOLLINGS, P.; KERRICH, R., 2006	51.2599	-92.7628	IGNEOUS	VOLCANIC	BASALT	2800	0	53.62	2.11	12.13	18.73				0.24	3.21	6.05	3.03	0.24	0.63	5.75	15.24	35.36	5.42	26.23	7.62	2.8	9.58	1.44	10.46	2.05	6.17	0.94	6.36	0.94	36	100	6	39	8			203		92	0.62	0.45
SB95-40	GEOROC	HOLLINGS, P.; KERRICH, R., 2006	51.2279	-92.7684	IGNEOUS	VOLCANIC	BASALT	2800	0	54.19	0.87	18.31	11.05				0.21	4.01	6.22	1.61	3.33	0.21	3.58	17.96	40.83	4.67	18.04	3.48	1.14	3.21	0.42	2.46	0.48	1.31	0.21	1.28	0.19	20	161	143	38	117			131		250	0.49	0.79
SB95-42	GEOROC	HOLLINGS, P.; KERRICH, R., 2006	51.2315	-92.7629	IGNEOUS	VOLCANIC	BASALT	2800	0	51.99	0.71	15.7	12.31				0.24	6.67	10.61	1.72		0.05	4.8	2	5.38	0.78	4.18	1.5	0.66	2.41	0.42	3.1	0.68	1.94	0.28	1.89	0.27	48	337	452	70	159			44		22	0.09	0.07
00-CM-027	GEOROC	MAURICE, C.; DAVID, J.; BEDARD, J. H.; FRANCIS, D. M., 2009	60.9694	-73.6425	IGNEOUS	VOLCANIC	THOLEIITE	2800	80	49.01	1.51	16.11		16.21			0.21	4.03	8.38	3.95	0.71	0.19	0.44	10.2	21.7	3.5	16.9	5	1.79	6.06	1.2	7.05	1.53	4.51	0.64	4.37	0.64		137	115	38	33	118		111.3	23
00-CM-030	GEOROC	MAURICE, C.; DAVID, J.; BEDARD, J. H.; FRANCIS, D. M., 2009	60.9694	-73.6405	IGNEOUS	VOLCANIC	THOLEIITE	2800	80	51.58	1.29	15.86		13.08			0.26	4.98	9.7	3.33	0.21	0.1	0.31	4	9	1.7	8.5	3.2	0.98	3.97	0.81	4.56	1.12	3.01	0.45	2.84	0.42		308	247	45	76	115		69.6	18.3
00-CM-031	GEOROC	MAURICE, C.; DAVID, J.; BEDARD, J. H.; FRANCIS, D. M., 2009	60.9695	-73.6392	IGNEOUS	VOLCANIC	THOLEIITE	2800	80	52.8	1.34	15.66		11.77			0.21	4.83	10.56	3.02	0.21	0.1	0.37	3.4	10	1.84	9	3	1.16	4.59	0.79	4.67	1.02	3.02	0.48	2.78	0.4		324	228	43	83	92		75.2	18.4
00-CM-033	GEOROC	MAURICE, C.; DAVID, J.; BEDARD, J. H.; FRANCIS, D. M., 2009	60.9695	-73.6376	IGNEOUS	VOLCANIC	THOLEIITE	2800	80	50.66	1.6	14.91		16.58			0.25	4.12	8.82	2.42	0.28	0.18	0.14	5.3	12.8	2.44	14.6	4.3	1.5	6.86	1.16	7.06	1.48	4.87	0.66	4.65	0.69		143	168	48	202	151		120.6	21.4
00-CM-037	GEOROC	MAURICE, C.; DAVID, J.; BEDARD, J. H.; FRANCIS, D. M., 2009	60.9691	-73.6363	IGNEOUS	VOLCANIC	THOLEIITE	2800	80	50.66	2.19	12.55		19.13			0.29	4.56	8.63	2.13	0.31	0.21	0.17	9.2	20.6	3.54	18.1	5.3	1.75	7.49	1.42	8.4	1.84	5.12	0.82	5.11	0.75		244		61	38	166		136.1	20.6
00-CM-053	GEOROC	MAURICE, C.; DAVID, J.; BEDARD, J. H.; FRANCIS, D. M., 2009	61.0102	-73.6043	IGNEOUS	VOLCANIC	THOLEIITE	2800	80	47.54	1.17	15.87		14.33			0.19	7.56	10.63	3.02	0.09	0.09	0.4	5.4	11.6	1.91	10.2	2.9	1.02	4.04	0.78	4.58	0.99	3.02	0.43	2.59	0.39		289	349	61	149	95		65.3	17.8
00-CM-076	GEOROC	MAURICE, C.; DAVID, J.; BEDARD, J. H.; FRANCIS, D. M., 2009	60.9526	-73.6293	IGNEOUS	VOLCANIC	THOLEIITE	2800	80	50.36	1.26	16.97		12.63			0.17	4.56	11.75	2.47	0.27	0.11	0.33	5.5	12.2	1.96	10.3	3.5	1.03	4.52	0.82	4.79	1.08	2.96	0.47	2.74	0.42		304	355	48	167	64		69.8	18.2
00-CM-079	GEOROC	MAURICE, C.; DAVID, J.; BEDARD, J. H.; FRANCIS, D. M., 2009	60.9523	-73.6257	IGNEOUS	VOLCANIC	THOLEIITE	2800	80	52.37	1.46	14.33		14.07			0.18	6.21	9.53	2.04	0.15	0.14	0.31	5.3	12.2	2.16	12	4.1	1.34	6	1.11	6.89	1.38	4.17	0.67	4.06	0.58		329	154	49	53	80		91.9	17.9
00-CM-081	GEOROC	MAURICE, C.; DAVID, J.; BEDARD, J. H.; FRANCIS, D. M., 2009	60.9522	-73.624	IGNEOUS	VOLCANIC	THOLEIITE	2800	80	48.63	1.26	14.98		14.88			0.26	6.19	11.9	1.98	0.17	0.1	0.25	13.2	22.3	3.35	15.8	3.7	0.95	5.08	0.79	4.83	1	3.17	0.5	2.96	0.43		313	219	43	139	104		67.3	17.8
00-CM-083	GEOROC	MAURICE, C.; DAVID, J.; BEDARD, J. H.; FRANCIS, D. M., 2009	60.9516	-73.622	IGNEOUS	VOLCANIC	THOLEIITE	2800	80	51	1.37	15.05		14.27			0.19	7.15	9.15	2.24	0.13	0.12	0.14	4.5	12.8	2	9.4	3.3	1.41	4.78	0.76	4.88	1.12	3.2	0.46	3.05	0.54		302	198	48	66	113		80.1	19.1
00-CM-086	GEOROC	MAURICE, C.; DAVID, J.; BEDARD, J. H.; FRANCIS, D. M., 2009	60.8383	-73.7528	IGNEOUS	VOLCANIC	THOLEIITE	2800	80	50.1	1.36	15.19		14.45			0.19	7.37	8.58	3.15	0.15	0.12	0.16	4.2	11.5	1.81	10	3.6	1.14	4.82	0.88	4.87	1.16	3.27	0.53	3.42	0.56		333	204	45	67	95		81.7	19.3
01-LM-1130	GEOROC	MAURICE, C.; DAVID, J.; BEDARD, J. H.; FRANCIS, D. M., 2009	60.2361	-75.4539	IGNEOUS	VOLCANIC	NOT-GIVEN	2800	80	53.44	0.91	16.18		10.66			0.17	4.66	9.13	3.85	0.63	0.22	0.73	20	45.2	6.57	24.7	5	1.43	4.56	0.52	2.91	0.58	1.63	0.25	1.7	0.25		203	64	31	30	33		67.9	16.1
01-LM-1131	GEOROC	MAURICE, C.; DAVID, J.; BEDARD, J. H.; FRANCIS, D. M., 2009	60.2366	-75.4496	IGNEOUS	VOLCANIC	NOT-GIVEN	2800	80	50.72	1.24	15.69		14.19			0.22	4.91	9.96	2.59	0.56	0.22	0.26	17	38.1	5.24	21.9	4.6	1.41	4.7	0.7	4.4	1.01	2.84	0.43	2.77	0.43		255		41	33	76		97.4	21.6
01-LM-1132	GEOROC	MAURICE, C.; DAVID, J.; BEDARD, J. H.; FRANCIS, D. M., 2009	60.2366	-75.4481	IGNEOUS	VOLCANIC	NOT-GIVEN	2800	80	49.87	1	16.08		13.43			0.21	4.56	9.89	4.04	0.67	0.31	0.36	27	66	9.09	36.9	7.4	1.89	6.16	0.73	4.06	0.75	2.12	0.31	2.06	0.31		229		41	10	76		86.6	21.5
01-LM-1134	GEOROC	MAURICE, C.; DAVID, J.; BEDARD, J. H.; FRANCIS, D. M., 2009	60.234	-75.4404	IGNEOUS	VOLCANIC	NOT-GIVEN	2800	80	53.7	0.55	18.11		7.49			0.11	5.65	10.84	3.45	0.3	0.1	0.34	7.6	17.3	2.35	10	2.2	0.79	2.24	0.31	1.93	0.38	1.02	0.19	1	0.16		113	171	37	155	30		56.2	15.6
01-LM-1137	GEOROC	MAURICE, C.; DAVID, J.; BEDARD, J. H.; FRANCIS, D. M., 2009	60.0776	-75.807	IGNEOUS	VOLCANIC	THOLEIITE	2800	80	47.58	1.1	15.5		15.27			0.23	7.16	10.05	2.85	0.16	0.09	0.49	3	8.6	1.42	7.4	2.6	1.1	4.12	0.72	4.06	0.93	2.76	0.37	2.34	0.41		285	86	49	93	72		57.3	23.1
01-LM-1138	GEOROC	MAURICE, C.; DAVID, J.; BEDARD, J. H.; FRANCIS, D. M., 2009	60.077	-75.8045	IGNEOUS	VOLCANIC	THOLEIITE	2800	80	46.3	0.79	15.63		13.53			0.26	7.83	12.73	1.86	0.12	0.07	0.89	2.2	6.7	1.02	4.6	1.9	0.62	2.48	0.5	3	0.71	1.83	0.28	1.75	0.25		199	79	63	257	60		43.5	18.8
01-LM-1141	GEOROC	MAURICE, C.; DAVID, J.; BEDARD, J. H.; FRANCIS, D. M., 2009	60.0767	-75.7909	IGNEOUS	VOLCANIC	THOLEIITE	2800	80	53.27	0.68	14.94		9.44			0.21	6.99	11.92	1.83	0.34	0.08	0.53	5.8	12.2	1.8	8.4	2.1	0.7	2.43	0.38	2.69	0.6	1.88	0.29	1.58	0.29		214	273	41	67	6		52.3	13.7
02-CM-2500	GEOROC	MAURICE, C.; DAVID, J.; BEDARD, J. H.; FRANCIS, D. M., 2009	60.3763	-75.4267	IGNEOUS	VOLCANIC	THOLEIITE	2800	80	49.55	2.01	14.38		16.77			0.187	5.67	8.63	2.26	0.14	0.241	0.19	14.8	32.4	4.44	20.5	5.6	1.71	6.7	1.12	6.86	1.59	4.33	0.65	3.97	0.62		308	62	45	41	25		148.4	22.1
02-CM-2502	GEOROC	MAURICE, C.; DAVID, J.; BEDARD, J. H.; FRANCIS, D. M., 2009	60.3796	-75.4176	IGNEOUS	VOLCANIC	THOLEIITE	2800	80	50.04	1.257	13.95		15.46			0.2	6.1	9.16	3.05	0.18	0.106	0.33	4.8	12.4	1.86	9.1	3.1	1.26	4	0.68	4.22	0.79	2.25	0.34	2.16	0.32		266	75	54	88	25		68.8	20.6
02-CM-2504	GEOROC	MAURICE, C.; DAVID, J.; BEDARD, J. H.; FRANCIS, D. M., 2009	60.3798	-75.4063	IGNEOUS	VOLCANIC	THOLEIITE	2800	80	49.08	1.15	15.06		14.7			0.22	6.44	9.95	2.64	0.16	0.1	0.3	3.5	10.3	1.61	8.3	2.9	1.14	4.14	0.72	4.49	0.97	2.8	0.46	2.74	0.4		274	175	41	80	33		65.6	20.1
02-CM-2506	GEOROC	MAURICE, C.; DAVID, J.; BEDARD, J. H.; FRANCIS, D. M., 2009	60.3805	-75.3924	IGNEOUS	VOLCANIC	THOLEIITE	2800	80	45.57	1.12	14.79		15.49			0.22	8.68	10.69	2.41	0.2	0.09	0.6	7.9	17.2	2.65	12.8	3.6	1.23	3.9	0.67	3.91	0.8	1.98	0.3	1.81	0.26		239	191	54	140	4		72.9	20.4
02-CM-2507	GEOROC	MAURICE, C.; DAVID, J.; BEDARD, J. H.; FRANCIS, D. M., 2009	60.3791	-75.3829	IGNEOUS	VOLCANIC	NOT-GIVEN	2800	80	51.49	0.56	17.64		8.42			0.12	8.46	7.68	4.04	0.09	0.2	1.42	19.2	42.9	5.26	22	4	1.05	2.92	0.53	2.86	0.6	1.53	0.27	1.51	0.23		125	354	35	195	20		82.3	18.3
02-CM-2508	GEOROC	MAURICE, C.; DAVID, J.; BEDARD, J. H.; FRANCIS, D. M., 2009	60.379	-75.3812	IGNEOUS	VOLCANIC	NOT-GIVEN	2800	80	53.39	0.52	17.56		7.7			0.11	7.46	9.15	2.99	0.21	0.16	1.02	15.3	34.4	4.3	16.4	3.4	1.01	3.36	0.48	2.75	0.53	1.52	0.25	1.34	0.23		113	320	38	167	5		84.2	18.2
02-CM-2510	GEOROC	MAURICE, C.; DAVID, J.; BEDARD, J. H.; FRANCIS, D. M., 2009	60.3772	-75.378	IGNEOUS	VOLCANIC	NOT-GIVEN	2800	80	51.88	0.5	17.41		7.94			0.11	8.15	10.76	1.62	0.08	0.13	1.39	10.7	34	3.13	12.9	2.5	0.92	2.12	0.37	2.22	0.4	1.27	0.22	1.33	0.21		117	387	34	222	11		66.4	17.7
02-CM-2512	GEOROC	MAURICE, C.; DAVID, J.; BEDARD, J. H.; FRANCIS, D. M., 2009	60.3777	-75.3667	IGNEOUS	VOLCANIC	NOT-GIVEN	2800	80	53.05	0.61	17.81		8.37			0.12	6.14	9.04	3.88	0.16	0.13	0.65	9.4	21.1	2.77	12.2	2.3	0.85	2.23	0.39	2.43	0.52	1.39	0.24	1.26	0.21		132	256		107			74.4	20
3078B	GEOROC	MAURICE, C.; DAVID, J.; BEDARD, J. H.; FRANCIS, D. M., 2009	59.7828	-77.2021	IGNEOUS	VOLCANIC	THOLEIITE	2800	80	48.61	1.09	14.35		13.61			0.22	6.93	10.51	1.86	0.48	0.06	4.03	4.01	11.26	1.73	8.53	2.69	0.96	3.67	0.67	4.38	0.96	2.9	0.34	2.17	0.33		332	169.3	65.7		69.9		60.3
3081A	GEOROC	MAURICE, C.; DAVID, J.; BEDARD, J. H.; FRANCIS, D. M., 2009	59.7676	-77.1488	IGNEOUS	VOLCANIC	THOLEIITE	2800	80	53.33	1	15.14		9.41			0.18	6.78	9.81	1.79	0.46	0.07	0.73	5.1	12.8	1.82	8.36	2.39	0.95	3.32	0.6	3.86	0.82	2.52	0.3	1.9	0.3		342.5	160.9	33.8	52	69.8		63.8
3081B	GEOROC	MAURICE, C.; DAVID, J.; BEDARD, J. H.; FRANCIS, D. M., 2009	59.7676	-77.1488	IGNEOUS	VOLCANIC	THOLEIITE	2800	80	53.32	1.44	16.28		10.91			0.26	5.11	8.44	2.34	0.78	0.08	1.28	4.97	13.25	2.03	10.02	3.23	1.14	4.42	0.78	5.12	1.11	3.39	0.44	2.71	0.43		414.5	100.6	58.6	44	72.8		86.06
3133A	GEOROC	MAURICE, C.; DAVID, J.; BEDARD, J. H.; FRANCIS, D. M., 2009	59.6195	-77.5129	IGNEOUS	VOLCANIC	THOLEIITE	2800	80	49.05	0.81	13.54		13.82			0.21	7.02	10.23	2.11	0.47	0.05	1.04	3.28	8.32	1.26	6.25	1.98	0.73	2.63	0.49	3.21	0.72	2.07	0.28	1.75	0.26		281.4	205.7	63.7	97.54	58		44.58
4102A	GEOROC	MAURICE, C.; DAVID, J.; BEDARD, J. H.; FRANCIS, D. M., 2009	59.8017	-77.1384	IGNEOUS	VOLCANIC	THOLEIITE	2800	80	49.74	1.21	14.32		16.09			0.2	6.98	9.06	3.05	0.43	0.08	0.34	3.32	10.56	1.62	8.63	2.89	0.92	4.44	0.79	5.51	1.23	3.88	0.52	3.49	0.56		387.1	125.3	85.2	78	61.6		68.51
7177B	GEOROC	MAURICE, C.; DAVID, J.; BEDARD, J. H.; FRANCIS, D. M., 2009	59.7017	-77.3568	IGNEOUS	VOLCANIC	THOLEIITE	2800	80	49.02	0.88	14.37		13.08			0.21	7.32	10.93	2.61	0.18	0.07	1.06	3.63	9.48	1.47	7.15	1.99	0.83	2.98	0.52	3.49	0.73	2.15	0.29	1.92	0.3		269.9	239.9	42.7	99	95.4		56.01
AC1142A	GEOROC	MAURICE, C.; DAVID, J.; BEDARD, J. H.; FRANCIS, D. M., 2009	59.9766	-73.6112	IGNEOUS	VOLCANIC	NOT-GIVEN	2800	80	54.6	0.83	17.6		9.12			0.14	4.44	7.43	3.76	1.7	0.25	0.92	24.76	52.41	6.56	28.85	5.14	1.601	3.91	0.607	2.93	0.557	1.583	0.227	1.4	0.21			20
JY9014A1	GEOROC	MAURICE, C.; DAVID, J.; BEDARD, J. H.; FRANCIS, D. M., 2009	59.8555	-73.5403	IGNEOUS	VOLCANIC	NOT-GIVEN	2800	80	48.9	1.069	15.5		13.5			0.19	8.88	10.5	0.93	0.15	0.06	0.65	6.93	17.68	1.75	8.43	1.25	1.195	1.94	0.27	1.47	0.315	0.955	0.14	0.97	0.155			217	48		112			4.6
DB-93	GEOROC	MYERS, R. E.; CAWTHORN, R. G.; MCCARTHY, T. S.; ANHAEUSSER, C. R., 1987	-25.87	24.73	IGNEOUS	VOLCANIC	NOT-GIVEN	2800	0	51.7	0.76	13.06		12.36			0.18	9.15	9.54	2.5	0.57	0.17		9	24		16												239	1158	79	321	93	71	80		223
AT8	GEOROC	NISBET, E. G.; BICKLE, M. J.; MARTIN, A., 1977	-20.57	30.4	IGNEOUS	VOLCANIC	BASALT	2800	0	46.83	0.26	5.49	1.16		9.4		0.17	31.13	5.29	0.2	0.05	0.03	6.83
B4	GEOROC	NISBET, E. G.; BICKLE, M. J.; MARTIN, A., 1977	-20.57	30.4	IGNEOUS	VOLCANIC	BASALT	2800	0	46.74	0.31	6.3	1.24		10.07		0.18	27.93	6.32	0.75	0.14	0.03	4.74																	2728	119	1404
BL1	GEOROC	NISBET, E. G.; BICKLE, M. J.; MARTIN, A., 1977	-20.57	30.4	IGNEOUS	VOLCANIC	BASALT	2800	0	52.85	0.73	15.25	1.01		8.14		0.16	7.57	11.75	2.49	0.01	0.06	2.67
BL22	GEOROC	NISBET, E. G.; BICKLE, M. J.; MARTIN, A., 1977	-20.57	30.4	IGNEOUS	VOLCANIC	BASALT	2800	0	50.29	0.76	15.72	1.24		10.02		0.17	8.38	12.22	1.03	0.11	0.06	2.97
BL26	GEOROC	NISBET, E. G.; BICKLE, M. J.; MARTIN, A., 1977	-20.57	30.4	IGNEOUS	VOLCANIC	BASALT	2800	0	51.43	0.84	14.71	1.36		10.97		0.21	7.09	11.27	1.96	0.1	0.07	2.69																	1046	94	191
BL27	GEOROC	NISBET, E. G.; BICKLE, M. J.; MARTIN, A., 1977	-20.57	30.4	IGNEOUS	VOLCANIC	BASALT	2800	0	52.58	0.86	14.99	1.27		10.28		0.19	7.03	10.23	2.35	0.15	0.07	2.7
BL28	GEOROC	NISBET, E. G.; BICKLE, M. J.; MARTIN, A., 1977	-20.57	30.4	IGNEOUS	VOLCANIC	BASALT	2800	0	50.62	0.89	14.99	1.33		10.73		0.2	7.92	11.35	1.69	0.23	0.07	3.31
BL29	GEOROC	NISBET, E. G.; BICKLE, M. J.; MARTIN, A., 1977	-20.57	30.4	IGNEOUS	VOLCANIC	BASALT	2800	0	53.27	1.54	8.35	1.65		13.37		0.21	8.15	11.9	0.88	0.48	0.21	2.23
BL31	GEOROC	NISBET, E. G.; BICKLE, M. J.; MARTIN, A., 1977	-20.57	30.4	IGNEOUS	VOLCANIC	BASALT	2800	0	54.68	0.84	14.36	1.17		9.5		0.19	6.85	11.1	1.22	0.02	0.08	3.19
BL33	GEOROC	NISBET, E. G.; BICKLE, M. J.; MARTIN, A., 1977	-20.57	30.4	IGNEOUS	VOLCANIC	BASALT	2800	0	53.62	0.87	14.64	1.14		9.21		0.17	10.04	7.67	2.43	0.11	0.09	3.96
BL34	GEOROC	NISBET, E. G.; BICKLE, M. J.; MARTIN, A., 1977	-20.57	30.4	IGNEOUS	VOLCANIC	BASALT	2800	0	52.6	0.89	13.06	1.24		10		0.17	10.74	9.63	0.8	0.78	0.1	3.49
BL8	GEOROC	NISBET, E. G.; BICKLE, M. J.; MARTIN, A., 1977	-20.57	30.4	IGNEOUS	VOLCANIC	BASALT	2800	0	53.32	1.46	8.84	1.41		11.39		0.2	8.32	12.76	2.02	0.13	0.15	3.11
NG110	GEOROC	NISBET, E. G.; BICKLE, M. J.; MARTIN, A., 1977	-20.33	30.03	IGNEOUS	VOLCANIC	BASALT	2800	0	53.41	0.82	15.09	1.28		10.37		0.15	7.76	7.47	3.2	0.39	0.06	3.19
NG124	GEOROC	NISBET, E. G.; BICKLE, M. J.; MARTIN, A., 1977	-20.33	30.03	IGNEOUS	VOLCANIC	BASALT	2800	0	46.52	0.23	4.88	1.15		9.37		0.12	32.84	4.81	0.04	0.02	0.01	9.47
NG133	GEOROC	NISBET, E. G.; BICKLE, M. J.; MARTIN, A., 1977	-20.33	30.03	IGNEOUS	VOLCANIC	BASALT	2800	0	53.77	0.55	11.12	1.28		10.34		0.2	11.5	8.65	2.55	0.02	0.03	2.34
NG138	GEOROC	NISBET, E. G.; BICKLE, M. J.; MARTIN, A., 1977	-20.33	30.03	IGNEOUS	VOLCANIC	BASALT	2800	0	47.47	0.34	6.8	1.28		10.39		0.19	26.09	7.14	0.04	0.23	0.02	7.99																	2821	123	1262
NG159	GEOROC	NISBET, E. G.; BICKLE, M. J.; MARTIN, A., 1977	-20.33	30.03	IGNEOUS	VOLCANIC	BASALT	2800	0	54.79	0.61	12.86	1.11		9		0.2	8.16	9.51	3.54	0.17	0.07	1.24
NG161	GEOROC	NISBET, E. G.; BICKLE, M. J.; MARTIN, A., 1977	-20.33	30.03	IGNEOUS	VOLCANIC	BASALT	2800	0	53.5	0.87	14.58	1.21		9.76		0.15	8.09	8.57	2.91	0.29	0.07	3.17
NG219	GEOROC	NISBET, E. G.; BICKLE, M. J.; MARTIN, A., 1977	-20.33	30.03	IGNEOUS	VOLCANIC	BASALT	2800	0	46.41	0.2	4.73	1.16		9.35		0.16	33.2	4.67	0.04	0.09		7.9																	3149	123	1782
SF134	GEOROC	NISBET, E. G.; BICKLE, M. J.; MARTIN, A., 1977	-20.57	30.4	IGNEOUS	VOLCANIC	BASALT	2800	0	49.32	0.48	15.94				10.74	0.22	13.28	5.72	2.66	0.57
SF134	GEOROC	NISBET, E. G.; BICKLE, M. J.; MARTIN, A., 1977	-20.57	30.4	IGNEOUS	VOLCANIC	BASALT	2800	0	46.74	0.28	6.09	1.18		9.55		0.18	28.66	6.31	0.71	0.13	0.07	4.83																	2898	126	1422
2	GEOROC	PAPUNEN, H.; HALKOAHO, T.; LIIMATAINEN, J.; TULENHEIMO, T., 1998	64.2486	29.0733	IGNEOUS	VOLCANIC	BASALT	2800	10	53.6	0.71	13.5				10.8	0.24	7.19	10.6	2.69	0.19	0.05																	279	2443		260
3	GEOROC	PAPUNEN, H.; HALKOAHO, T.; LIIMATAINEN, J.; TULENHEIMO, T., 1998	64.2486	29.0733	IGNEOUS	VOLCANIC	BASALT	2800	10	50	0.45	10.2				11	0.25	14.8	11.6	1.16	0.25	0.04																	194	1567		540
331/337	GEOROC	SUN, SHEN-SU; NESBITT, R. W.; MCCULLOCH, M. T., 1989	-21	118	IGNEOUS	VOLCANIC	BASALT	2800	0	51.48	0.39	9.93		10.63			0.23	16.5	9.06	0.98	0.34	0.04	4.06	7.12	15.1		6.02	1.44	0.392	1.65		1.93		1.24		1.24		28	147	2535	70	471			41		135
16	GEOROC	MAURICE, C.; FRANCIS, D. M.; MADORE, L., 2003	59.8	-72	IGNEOUS	VOLCANIC	BASALT	2795	85	49.95	1.03	15.11		12.94			0.2	6.99	11.44	2.03	0.11	0.07	0.77	2.62	7.2	1.17	6.07	2.12	0.84	3.1	0.55	3.6	0.78	2.38	0.36	2.37	0.33		285	286	53	115	84	87	54		29		0.05
17	GEOROC	MAURICE, C.; FRANCIS, D. M.; MADORE, L., 2003	59.8	-72	IGNEOUS	VOLCANIC	BASALT	2795	85	48.67	0.54	12.87		11.97			0.25	11.54	11.4	1.48	0.27	0.03	0.85	1.67	4.2	0.63	3.19	1.1	0.52	1.78	0.36	2.32	0.53	1.64	0.25	1.68	0.24		205	1294	57	300	69	52	29		34
23	GEOROC	MAURICE, C.; FRANCIS, D. M.; MADORE, L., 2003	60.8	-71	IGNEOUS	VOLCANIC	BASALT	2795	85	46.12	0.51	16.61		11.37			0.19	10	9.36	1.34	2.58	0.04	2.09	3.18	6.3	0.85	3.74	1.1	0.53	1.68	0.3	1.89	0.41	1.22	0.2	1.29	0.19		161	703	52	321	87	58	26		220		0.23
27	GEOROC	MAURICE, C.; FRANCIS, D. M.; MADORE, L., 2003	60.8	-71	IGNEOUS	VOLCANIC	BASALT	2795	85	53.5	0.77	14.13		13.35			0.2	5.35	8.37	3.05	0.4	0.09	1.15	5.73	14	1.94	8.59	2.3	0.89	3.12	0.53	3.34	0.71	2.09	0.31	2.15	0.31		252	27	47	45	151	33	66		53		0.32
34	GEOROC	MAURICE, C.; FRANCIS, D. M.; MADORE, L., 2003	60.8	-71	IGNEOUS	VOLCANIC	BASALT	2795	85	49.33	0.46	12.6		15.75			0.28	8.05	10.23	2.58	0.27	0.01	0.8	1.36	3.8	0.52	2.46	0.84	0.39	1.37	0.33	1.8	0.43	1.26	0.19	1.27	0.2		285	88	69	176	71	71	21		17		0.06
38	GEOROC	MAURICE, C.; FRANCIS, D. M.; MADORE, L., 2003	60.8	-71	IGNEOUS	VOLCANIC	BASALT	2795	85	48.61	0.74	15.4		11.93			0.21	6.99	13.08	1.77	0.62	0.05	1.22	2.6	6.6	1.01	5.17	1.73	0.7	2.57	0.48	3.11	0.67	2.05	0.32	2.13	0.3		228	498	52	175	70	156	41		54		0.06
43	GEOROC	MAURICE, C.; FRANCIS, D. M.; MADORE, L., 2003	60	-70.5	IGNEOUS	VOLCANIC	BASALT	2795	85	48.99	0.61	15.58		11.76			0.19	8.72	11.66	1.7	0.15	0.05	0.91	2.36	6	0.89	4.19	1.39	0.55	2.04	0.39	2.65	0.57	1.83	0.3	1.96	0.27		211	566	46	161	65	78	35		2		0.06
54	GEOROC	MAURICE, C.; FRANCIS, D. M.; MADORE, L., 2003	60	-70.5	IGNEOUS	VOLCANIC	BASALT	2795	85	49.27	0.85	15.38		12.02			0.18	7.82	11.56	1.65	0.49	0.06	0.9	3.78	8.4	1.25	6.11	2	0.75	2.89	0.52	3.38	0.74	2.23	0.35	2.36	0.33		252	524	37	143	76	152	52		73		0.26
56	GEOROC	MAURICE, C.; FRANCIS, D. M.; MADORE, L., 2003	60.8	-71	IGNEOUS	VOLCANIC	BASALT	2795	85	48.54	1.04	14.57		14.5			0.21	8.05	7.57	2.56	1.48	0.07	1.99	2.62	7.7	1.25	6.48	2.2	0.72	3.2	0.59	3.83	0.84	2.55	0.4	2.63	0.36		276	282	56	128	100	98	57		282		0.15
57	GEOROC	MAURICE, C.; FRANCIS, D. M.; MADORE, L., 2003	60.8	-71	IGNEOUS	VOLCANIC	BASALT	2795	85	48.63	0.83	15.07		12.45			0.21	7.56	11.43	2.63	0.35	0.06	1.36	2.77	6.8	1.05	5.29	1.74	0.74	2.76	0.48	3.18	0.66	2.06	0.32	2.17	0.31		235	357	53	160	74	191	42		30		0.08
74	GEOROC	MAURICE, C.; FRANCIS, D. M.; MADORE, L., 2003	60.8	-71	IGNEOUS	VOLCANIC	BASALT	2795	85	46.47	0.73	15.21		11.75			0.18	8.95	13.03	1.35	0.72	0.05	1.66	2.01	5.1	0.78	3.97	1.33	0.56	1.94	0.36	2.28	0.48	1.44	0.22	1.48	0.21		209	911	54	354	54	216	32		78		0.05
8	GEOROC	MAURICE, C.; FRANCIS, D. M.; MADORE, L., 2003	59.8	-72	IGNEOUS	VOLCANIC	BASALT	2792.5	82.5	50.79	0.66	15.88		11.58			0.17	7.72	10.93	2.07	0.19	0.06	0.54	2.47	6.2	0.94	4.73	1.48	0.59	2.11	0.41	2.63	0.58	1.85	0.29	1.98	0.28		223	212	32	78	69	155	35				0.07
1	GEOROC	PAPUNEN, H.; HALKOAHO, T.; LIIMATAINEN, J.; TULENHEIMO, T., 1998	64.2329	29.0882	IGNEOUS	VOLCANIC	BASALT	2790	0	50.21	0.71	16.5				11.14	0.19	7.29	12.06	1.56	0.228	0.07																	260	272	110	150	60	250
SL-54	GEOROC	WYMAN, D. A., 2000	49	-90	IGNEOUS	VOLCANIC	NOT-GIVEN	2780	0	49.33	0.91	15.04	13.82				0.23	7.61	11.05	1.84	0.09	0.08	2.25	2.68	7.37	1.13	5.83	2.05	0.74	2.62	0.48	3.38	0.74	2.04	0.33	2.16	0.32	42	282	294	54	137			50		19	0.16	0.25
11	GEOROC	BOILY, M.; DION, C., 2002	51	-74	IGNEOUS	VOLCANIC	BASALT	2775	15	51.4	0.38	13.4		9.6				10.2	10.8	2.5		0.04																							36
133731IC	GEOROC	BOILY, M.; DION, C., 2002	51	-74	IGNEOUS	VOLCANIC	BASALT	2775	15	49	0.44	14.5				8.6	0.2	7	10.7	1.8	0.3	0.09	2.1	2.75	5.62	0.82	3.32	0.99	0.36	1.4	0.26	2.08	0.47	1.41	0.23	1.57	0.26					35			40		39	0.06	0.18
135587IC	GEOROC	BOILY, M.; DION, C., 2002	51	-74	IGNEOUS	VOLCANIC	BASALT	2775	15	49.5	0.37	13.7				10.2	0.2	13	6.1	1.5	0.8	0.1	4.6	2.21	4.17	0.57	2.32	0.74	0.25	1.12	0.21	1.5	0.35	1.07	0.18	1.19	0.19					176			33		63	0.01	0.2
135643IC	GEOROC	BOILY, M.; DION, C., 2002	51	-74	IGNEOUS	VOLCANIC	ANDESITE	2775	15	52.2	0.36	13.7				10.6	0.2	9.3	9.7	1.7	0.1	0.01	2.3	2.8	5.43	0.75	3.12	0.93	0.4	1.32	0.24	1.81	0.41	1.25	0.22	1.38	0.21					119			21		20	0.12	0.13
135685IC	GEOROC	BOILY, M.; DION, C., 2002	51	-74	IGNEOUS	VOLCANIC	BASALT	2775	15	51.3	0.37	13.6				9.7	0.2	11.3	8.2	1.9	0.1	0.01	3.5	2.49	5.16	0.73	2.98	0.92	0.4	1.39	0.25	2.17	0.47	1.41	0.23	1.59	0.23					128			21		16	0.13	0.14
82-27-13	GEOROC	BOILY, M.; DION, C., 2002	51	-74	IGNEOUS	VOLCANIC	BASALT	2775	15	51	0.38	13.6		12.6				11.6	10.4	1.6		0.02																		800		180			29
85-16786	GEOROC	BOILY, M.; DION, C., 2002	51	-74	IGNEOUS	VOLCANIC	ANDESITE	2775	15	53.9	0.57	16.1		7.4			0.1	7.6	9.1	1.8	0.9	0.07	1.9																	220		113			71		179
85-16787	GEOROC	BOILY, M.; DION, C., 2002	51	-74	IGNEOUS	VOLCANIC	BASALT	2775	15	51.3	0.43	15.5		8.5			0.2	9.3	9.7	1.6	1.2	0.05	1.9																	153		129			48		158
92-6532	GEOROC	BOILY, M.; DION, C., 2002	51	-74	IGNEOUS	VOLCANIC	THOLEIITE	2775	15	46.6	0.62	15.3		10.9			0.2	10.5	11.1	1.5	0.2	0.05	2.3	2.5	6.04	0.96	4.3	1.34	0.54	1.82	0.33	2.3	0.49	1.46	0.22	1.3	0.19								54		38	0.08	0.06
93-12512	GEOROC	BOILY, M.; DION, C., 2002	51	-74	IGNEOUS	VOLCANIC	THOLEIITE	2775	15	51.3	0.55	14.2		12			0.2	7.7	12.5	0.1	0.1	0.02	0.7	1.53	3.46	0.62	2.75	1.04	0.46	1.58	0.3	2.09	0.46	1.37	0.21	1.26	0.19								41			0.05	0.03
93-12536	GEOROC	BOILY, M.; DION, C., 2002	51	-74	IGNEOUS	VOLCANIC	THOLEIITE	2775	15	47.9	0.55	11.3		12.7			0.2	11.9	11.3	1.2	0.3	0.02	1.6	1.46	3.21	0.59	2.65	0.96	0.41	1.5	0.27	1.92	0.41	1.21	0.18	1.12	0.17								40			0.05	0.03
93-12557	GEOROC	BOILY, M.; DION, C., 2002	51	-74	IGNEOUS	VOLCANIC	ANDESITE	2775	15	54.8	0.42	14.9		8.6			0.2	7.4	8.7	2.8	0.2	0.02	1.3																						48
93-12559	GEOROC	BOILY, M.; DION, C., 2002	51	-74	IGNEOUS	VOLCANIC	ANDESITE	2775	15	53.1	0.42	14.4		8.2			0.2	9.8	11.1	1.7	0.1	0.02	1	2.88	5.9	0.83	3.22	0.95	0.36	1.32	0.25	1.82	0.4	1.22	0.18	1.11	0.17								51		32	0.08	0.19
93-12628	GEOROC	BOILY, M.; DION, C., 2002	51	-74	IGNEOUS	VOLCANIC	THOLEIITE	2775	15	50.9	0.58	13.8		12.4			0.2	8.5	11.1	1.7	0.1	0.05	0.8	1.43	3.51	0.6	2.9	1.13	0.48	1.73	0.32	2.2	0.48	1.48	0.22	1.36	0.21								43			0.05	0.04
93-12638	GEOROC	BOILY, M.; DION, C., 2002	51	-74	IGNEOUS	VOLCANIC	THOLEIITE	2775	15	50.9	0.57	13.4		11.6			0.2	7.5	11.3	1.6	0.1	0.02	1.3	1.37	3.36	0.58	2.78	1.09	0.45	1.6	0.29	2.07	0.45	1.35	0.2	1.28	0.19								42			0.06	0.05
93-12639	GEOROC	BOILY, M.; DION, C., 2002	51	-74	IGNEOUS	VOLCANIC	THOLEIITE	2775	15	52	0.67	14.7		9.9			0.2	7.4	12.6	1.7	0.1	0.02	1	1.54	3.74	0.66	3.2	1.2	0.47	1.77	0.33	2.23	0.48	1.46	0.21	1.27	0.18								45			0.07	0.05
93-16157	GEOROC	BOILY, M.; DION, C., 2002	51	-74	IGNEOUS	VOLCANIC	BASALT	2775	15	51.8	0.47	14.4		9.6			0.2	9.9	9.9	0.9	0.8	0.02	2.3																						45
94-1359	GEOROC	BOILY, M.; DION, C., 2002	51	-74	IGNEOUS	VOLCANIC	THOLEIITE	2775	15	48.4	0.6	14		9.9			0.2	11.8	8.8	1.7	0.2		4.1	2.46	6.07	0.97	4.42	1.43	0.58	1.93	0.34	2.32	0.49	1.51	0.22	1.34	0.19								54		32	0.14	0.08
95-07301	GEOROC	BOILY, M.; DION, C., 2002	51	-74	IGNEOUS	VOLCANIC	ANDESITE	2775	15	54.6	0.96	16.7		7.7			0.2	3.1	11.5	0.5	2.5	0.19	1.7	16	37	4.8	20	4.2	1.3	3.9	0.6	3.5	0.74	2	0.33	2.1	0.32			154		79			36			0.31	0.45
95-07331	GEOROC	BOILY, M.; DION, C., 2002	51	-74	IGNEOUS	VOLCANIC	ANDESITE	2775	15	50.8	0.87	17.9		9.9			0.2	4.5	6.4	0.9	4.4	0.39	2.5	41	91	11	42	7.5	1.9	5.6	0.68	3.4	0.64	1.6	0.26	1.7	0.25			80					134			0.27	1.3
95-07349	GEOROC	BOILY, M.; DION, C., 2002	51	-74	IGNEOUS	VOLCANIC	THOLEIITE	2775	15	50.7	1.5	14.7		13.6			0.2	7	8	0.1	3.5	0.11	1.5	4.7	13	2	9.5	3.1	1.1	3.9	0.67	4.1	0.87	2.3	0.39	2.5	0.38			210		135			56			23	0.15
95-07372	GEOROC	BOILY, M.; DION, C., 2002	51	-74	IGNEOUS	VOLCANIC	THOLEIITE	2775	15	49.8	0.82	14.5		12			0.3	5.4	13	1.1	2	0.06	1.3	2.3	6.4	0.97	5.1	1.8	0.73	2.6	0.49	3.1	0.68	1.9	0.34	2.1	0.32			262		133			39			0.14	0.06
95-07374	GEOROC	BOILY, M.; DION, C., 2002	51	-74	IGNEOUS	VOLCANIC	THOLEIITE	2775	15	49.5	1.54	14.2		14.6			0.3	4.3	11.2	2.3	0.2	0.13	2.5	5.6	15	2.2	11	3.8	1.3	5.2	0.92	5.7	1.2	3.5	0.58	3.7	0.57			90		65			85			0.29	0.16
95-7304	GEOROC	BOILY, M.; DION, C., 2002	51	-74	IGNEOUS	VOLCANIC	BASALT	2775	15	51.4	0.36	13.6		10.7			0.2	10.7	10.5	1.7	0.1	0.03	1.3	1.9	4.2	0.55	2.5	0.76	0.33	1.2	0.25	1.7	0.4	1.2	0.21	1.4	0.22								24			0.07	0.1
95-7366	GEOROC	BOILY, M.; DION, C., 2002	51	-74	IGNEOUS	VOLCANIC	ANDESITE	2775	15	54.4	0.73	13.4		12.2			0.3	5.7	13.1	0.6		0.08	0.7	5.4	12	1.6	6.7	2	0.76	2.7	0.48	3.1	0.72	2.1	0.36	2.4	0.38								66			0.18	0.27
96-11299	GEOROC	BOILY, M.; DION, C., 2002	51	-74	IGNEOUS	VOLCANIC	THOLEIITE	2775	15	48.6	1.17	15.5		13.3			0.2	5.8	10	0.2	3.1	0.08	1.5	5.1	13	1.911	9	2.8	0.88	3.8	0.67	4.2	0.91	2.5	0.41	2.6	0.39			224		123			61			0.27	0.13
96-11305	GEOROC	BOILY, M.; DION, C., 2002	51	-74	IGNEOUS	VOLCANIC	THOLEIITE	2775	15	47.5	1.24	15.7		14.4			0.2	5.1	13	0.3	1.5	0.1	0.9	5.6	14.1	1.9	9	2.8	0.91	3.6	0.64	4	0.89	2.5	0.4	2.7	0.4			224		117			61			0.26	0.13
96-11314	GEOROC	BOILY, M.; DION, C., 2002	51	-74	IGNEOUS	VOLCANIC	THOLEIITE	2775	15	51	1.13	14		14			0.2	6	10.2	0.3	1.8	0.11	1.4	11	26	3.3	13	3.4	1.1	3.9	0.66	4.1	0.86	2.4	0.38	2.6	0.39			26		38			97			0.44	0.3
96-11324	GEOROC	BOILY, M.; DION, C., 2002	51	-74	IGNEOUS	VOLCANIC	BASALT	2775	15	53.1	0.44	15.3		9.3			0.2	7.5	11.4	1.4	0.1	0.04	1.1	3.1	6.7	0.89	3.6	1.1	0.42	1.6	0.31	2.1	0.48	1.5	0.24	1.6	0.25								38			0.11	0.21
96-11333	GEOROC	BOILY, M.; DION, C., 2002	51	-74	IGNEOUS	VOLCANIC	BASALT	2775	15	52.4	0.46	14.9		10.9			0.2	8.7	10	1.7	0.1	0.04	0.7																						35
96-11463	GEOROC	BOILY, M.; DION, C., 2002	51	-74	IGNEOUS	VOLCANIC	THOLEIITE	2775	15	48.3	1.26	16.9		12.4			0.2	5.7	11.6	0.2	2.5	0.08	0.7	5.5	13	1.9	8.8	2.5	1.1	3.3	0.56	3.5	0.77	2.2	0.34	2.3	0.35			276		142			48			0.21	0.13
96-11472	GEOROC	BOILY, M.; DION, C., 2002	51	-74	IGNEOUS	VOLCANIC	BASALT	2775	15	54.1		15		10			0.2	7	7.6	0.4	2.7	0.2	1.8	20	43	5.8	23	4.5	1.3	3.9	0.6	3.4	0.67	1.8	0.28	1.9	0.27			269		141			112			0.49	0.46
96-12002	GEOROC	BOILY, M.; DION, C., 2002	51	-74	IGNEOUS	VOLCANIC	ANDESITE	2775	15	54.3	1.02	17.8		9			0.2	4.1	8.5	0.4	3.9	0.23	0.5	31	61	8.5	33	5.9	1.3	5.1	0.75	4	0.78	2.2	0.36	2.3	0.35			102		71			131			0.61	0.81
96-12019	GEOROC	BOILY, M.; DION, C., 2002	51	-74	IGNEOUS	VOLCANIC	THOLEIITE	2775	15	51.1	1.11	16.7		11.5			0.2	5.4	10.7	0.3	2.2	0.09	0.8	7.9	19	2.7	12	3.3	1.1	4	0.69	4.2	0.88	2.4	0.38	2.4	0.35			293		84			76			0.33	0.27
96-12033	GEOROC	BOILY, M.; DION, C., 2002	51	-74	IGNEOUS	VOLCANIC	THOLEIITE	2775	15	46.2	1.54	16.6		14.9			0.2	9.3	8.4	0.4	1.3	0.1	0.9	7	17	2.4	11	3.1	1.2	4	0.68	4.2	0.9	2.5	0.41	2.6	0.41			260		131			69			0.3	0.16
96-12037	GEOROC	BOILY, M.; DION, C., 2002	51	-74	IGNEOUS	VOLCANIC	BASALT	2775	15	51.4	0.45	15.3		10.5			0.2	8.9	8.3	1.1	1.7	0.03	2.3																						36
96-12039	GEOROC	BOILY, M.; DION, C., 2002	51	-74	IGNEOUS	VOLCANIC	BASALT	2775	15	52.6	0.45	16.5		8.9			0.2	7.3	10.7	1.2	0.6	0.04	1.6																						43
96-12067	GEOROC	BOILY, M.; DION, C., 2002	51	-74	IGNEOUS	VOLCANIC	BASALT	2775	15	52.4	0.76	13.6		9.7			0.2	8.4	8.5	1.2	3.1	0.3	1.7	28	63	8.1	31	5.2	1.5	3.9	0.51	2.6	0.5	1.3	0.21	1.3	0.21			356		92			79			0.22	0.75
97-14448	GEOROC	BOILY, M.; DION, C., 2002	51	-74	IGNEOUS	VOLCANIC	THOLEIITE	2775	15	52.9	1.19	13.1		14.3			0.2	5.3	9.9	0.2	2.2	0.09	0.6	5.9	14	1.9	8.6	2.7	1	3.6	0.65	4.1	0.88	2.5	0.41	2.7	0.42			45		56			80			0.31	0.27
97-14463	GEOROC	BOILY, M.; DION, C., 2002	51	-74	IGNEOUS	VOLCANIC	BASALT	2775	15	51.8	0.53	15.3		9.3			0.2	7.4	8.5	2.8	1.8	0.03	2	2.6	6.7	0.96	4.3	1.2	0.5	1.7	0.3	1.9	0.42	1.2	0.2	1.3	0.19								29			0.13	0.1
97-14466	GEOROC	BOILY, M.; DION, C., 2002	51	-74	IGNEOUS	VOLCANIC	THOLEIITE	2775	15	52	1.06	13.9		11.5			0.2	6.6	11.4	0.2	1.9	0.09	1.1	4.1	11	1.7	8.5	2.7	0.88	3.5	0.62	3.7	0.81	2.3	0.37	2.4	0.38			148		57			64			0.22	0.06
97-14477	GEOROC	BOILY, M.; DION, C., 2002	51	-74	IGNEOUS	VOLCANIC	BASALT	2775	15	52.6	0.44	13.6		10.3			0.2	9.8	9.1	1.7	0.5	0.03	1.4																						38
97-14480	GEOROC	BOILY, M.; DION, C., 2002	51	-74	IGNEOUS	VOLCANIC	BASALT	2775	15	52.8	0.42	14.7		9.8			0.2	8.9	10.3	1.6	0.1	0.03	0.8	3.2	7	0.87	3.6	1	0.35	1.5	0.29	1.9	0.47	1.3	0.22	1.5	0.24								38			0.11	0.23
4	GEOROC	PAPUNEN, H.; HALKOAHO, T.; LIIMATAINEN, J.; TULENHEIMO, T., 1998	64.2362	29.1042	IGNEOUS	VOLCANIC	BASALT	2775	25	51.6	0.57	11.7				11	0.19	14.4	7.31	2.96	0.07																		233	903		320
5	GEOROC	PAPUNEN, H.; HALKOAHO, T.; LIIMATAINEN, J.; TULENHEIMO, T., 1998	64.2362	29.1042	IGNEOUS	VOLCANIC	BASALT	2775	25	50.6	0.57	11.7				10.8	0.19	15.7	7.51	2.65	0.05																		210	1389		460
8	GEOROC	PAPUNEN, H.; HALKOAHO, T.; LIIMATAINEN, J.; TULENHEIMO, T., 1998	64.2362	29.1042	IGNEOUS	VOLCANIC	BASALT	2775	25	45.8	0.72	13				14.7	0.23	14.6	9.41	1.2	0.1																		264	1067		350
129-TOH-94	GEOROC	PAPUNEN, H.; HALKOAHO, T.; LIIMATAINEN, J.; TULENHEIMO, T., 1998	64.2395	29.0938	IGNEOUS	VOLCANIC	BASALT	2775	25	50.5	0.53	11.1				11.7	0.23	12.5	11.5	1.6	0.19	0.03		0.6	1.8	0.4	2.3	1.1	0.5	2.2	0.4	2.7	0.5	1.6	0.2	1.6	0.2	32	218	978	62	290	100	4	16		19
12-HP-92	GEOROC	PAPUNEN, H.; HALKOAHO, T.; LIIMATAINEN, J.; TULENHEIMO, T., 1998	64.2318	29.0838	IGNEOUS	VOLCANIC	NOT-GIVEN	2775	25	53.9	0.83	16.2				9.21	0.19	5.33	11.4	2.7	0.23	0.04		2.8	7.2	1.4	6.4	2.5	0.9	3.4	0.7	4.5	0.9	2.8	0.5	2.9	0.5	44	267	410	81	161	140	90	15		60
196-TOH-93	GEOROC	PAPUNEN, H.; HALKOAHO, T.; LIIMATAINEN, J.; TULENHEIMO, T., 1998	64.2476	29.0568	IGNEOUS	VOLCANIC	BASALT	2775	25	55	0.77	16.2				8.06	0.16	7.1	8.73	3.26	0.56	0.08		10	20														308	698	60	250	170		44		206
5-HP-92	GEOROC	PAPUNEN, H.; HALKOAHO, T.; LIIMATAINEN, J.; TULENHEIMO, T., 1998	64.2324	29.0853	IGNEOUS	VOLCANIC	BASALT	2775	25	50	0.78	15.9				11.4	0.22	7.36	13	1.17	0.15	0.05		3	7.2	1.3	6.6	2.5	1.1	3.6	0.7	4.6	1	2.9	0.5	3	0.5	38	236	267	76	172	94	132	15		23
SII-15/130.0	GEOROC	PAPUNEN, H.; HALKOAHO, T.; LIIMATAINEN, J.; TULENHEIMO, T., 1998	64.2447	29.0647	IGNEOUS	VOLCANIC	NOT-GIVEN	2775	25	53.5	0.78	15.7				8.62	0.24	6.77	10.7	3.24	0.26	0.08		4	11	1.8	8.6	2.7	1	4	0.6	4.4	0.9	2.5	0.4	2.4	0.4	40	286	608	68	200	80	48	17		106
SII-15/39.0	GEOROC	PAPUNEN, H.; HALKOAHO, T.; LIIMATAINEN, J.; TULENHEIMO, T., 1998	64.2447	29.0647	IGNEOUS	VOLCANIC	NOT-GIVEN	2775	25	53.7	0.68	15.3				8.26	0.15	6.45	8.88	3.07	0.15	0.06		2.1	6.2	1.1	5.2	2	0.7	3	0.5	3.1	0.6	1.8	0.3	1.7	0.3	22	286	1676	92	550	70	8	17		205
129-TOH-94	GEOROC	PAPUNEN, H.; HALKOAHO, T.; LUUKKONEN, E:, 2009	64.2395	29.0938	IGNEOUS	VOLCANIC	BASALT	2775	25	48.4	0.511	10.6				11.2	0.217	12	11	1.53	0.183	0.032	1.73	10	10	0.4	2.3	1.1	0.5	2.2	0.4	2.7	0.5	1.6	0.2	1.6	0.2		218	978	80	290	100		7		26.87		1
12-HP-92	GEOROC	PAPUNEN, H.; HALKOAHO, T.; LUUKKONEN, E:, 2009	64.2318	29.0838	IGNEOUS	VOLCANIC	NOT-GIVEN	2775	25	53.51	0.82	16.04				9.14	0.188	5.29	11.27	2.68	0.23	0.042			1	1.4	6.4	2.5	0.9	3.4	0.7	4.5	0.9	2.8	0.5	2.9	0.5	44	267	410	81	161	140	90	43	17	60	1	0.2
196-TOH-93	GEOROC	PAPUNEN, H.; HALKOAHO, T.; LUUKKONEN, E:, 2009	64.2476	29.0568	IGNEOUS	VOLCANIC	BASALT	2775	25	53.8	0.752	15.8				7.88	0.16	6.94	8.54	3.19	0.552	0.081		10	20														308	698	60	250	170		44		206	10	3
5-HP-92	GEOROC	PAPUNEN, H.; HALKOAHO, T.; LUUKKONEN, E:, 2009	64.2324	29.0853	IGNEOUS	VOLCANIC	BASALT	2775	25	49.49	0.77	15.73				11.28	0.22	7.28	12.83	1.16	0.15	0.05			11	1.3	6.6	2.5	1.1	3.6	0.7	4.6	1	2.9	0.5	3	0.5	38	236	267	76	172	94	132	42	16	23	1.2	0.2
SII-15/130.0	GEOROC	PAPUNEN, H.; HALKOAHO, T.; LUUKKONEN, E:, 2009	64.2447	29.0647	IGNEOUS	VOLCANIC	NOT-GIVEN	2775	25	51.3	0.75	15.1				8.27	0.228	6.5	10.3	3.11	0.253	0.08			30	1.1	5.2	2	0.7	3	0.5	3.1	0.6	1.8	0.3	1.7	0.3		286	608	90	200	80	30	30		98.52		7
SII-15/39.0	GEOROC	PAPUNEN, H.; HALKOAHO, T.; LUUKKONEN, E:, 2009	64.2447	29.0647	IGNEOUS	VOLCANIC	NOT-GIVEN	2775	25	52	0.662	14.8				8	0.143	7.65	9.46	3.31	0.575	0.055			30	1.8	8.6	2.7	1	4	0.6	4.4	0.9	2.5	0.4	2.4	0.4		286	1676	110	550	70		15		179.13		11
96-11464	GEOROC	BOILY, M.; DION, C., 2002	51	-74	IGNEOUS	VOLCANIC	BASALT	2774	19	51.7	0.93	17.2		10.2			0.2	7	7	0.2	4	0.2	1.2	13	27	3.7	14	3.2	1.1	3.5	0.57	3.3	0.69	1.9	0.3	1.9	0.29			254		158			118			0.53	0.73
S102	GEOROC	MTORO, M.; MABOKO, M. A. H.; MANYA, S., 2009	-1.73	33.65	IGNEOUS	VOLCANIC	BASALT	2760	0	47.8	1.16	15.4		13.9			0.17	5.94	10.7	2.5	0.11	0.2	1.88	4.4	12.5	1.7	9	2.6	1	3.6	0.7	4.4	0.9	2.7	0.4	2.7	0.4		295	170		120			64		41	0.2	0.15
S104	GEOROC	MTORO, M.; MABOKO, M. A. H.; MANYA, S., 2009	-1.73	33.65	IGNEOUS	VOLCANIC	BASALT	2760	0	50.5	1.43	14.3		16.3			0.2	4.98	8.74	1.68	0.06	0.23	1.5	5.4	15.6	2.2	11.6	3.5	1.2	4.9	1	6.1	1.3	3.8	0.6	3.9	0.6		333	80		100			89		12	0.3	0.19
S106	GEOROC	MTORO, M.; MABOKO, M. A. H.; MANYA, S., 2009	-1.73	33.65	IGNEOUS	VOLCANIC	BASALT	2760	0	49.7	0.74	15.6		10.9			0.18	8.59	10.5	2.19	0.19	0.1	1	3.5	9.6	1.3	6.5	1.9	0.7	2.6	0.5	3.1	0.6	1.8	0.3	1.9	0.3		241	300		140			46		37	0.2	0.11
S107	GEOROC	MTORO, M.; MABOKO, M. A. H.; MANYA, S., 2009	-1.73	33.65	IGNEOUS	VOLCANIC	BASALT	2760	0	51.9	0.74	15.4		9.4			0.16	6.89	11.8	1.53	0.51	0.12	1.18	3.4	9.2	1.2	6.1	1.7	0.8	2.3	0.4	2.7	0.6	1.6	0.2	1.7	0.3		230	390		120			44		567	0.2	0.13
S108	GEOROC	MTORO, M.; MABOKO, M. A. H.; MANYA, S., 2009	-1.73	33.65	IGNEOUS	VOLCANIC	BASALT	2760	0	50.1	0.95	16.2		13			0.32	4.29	10.6	2.51	0.05	0.13	1.5	3.3	9.4	1.3	7	2.1	0.9	3	0.6	3.8	0.8	2.3	0.4	2.4	0.4		295	130		140			55		17	0.2	0.18
S108	GEOROC	MTORO, M.; MABOKO, M. A. H.; MANYA, S., 2009	-1.73	33.65	IGNEOUS	VOLCANIC	RHYOLITE	2760	0	50.1	0.95	16.2		13			0.32	4.29	10.6	2.51	0.05	0.13	1.5	3.3	9.4	1.3	7	2.1	0.9	3	0.6	3.8	0.8	2.3	0.4	2.4	0.4		295	130		140			55		17	0.2	0.18
S109	GEOROC	MTORO, M.; MABOKO, M. A. H.; MANYA, S., 2009	-1.73	33.65	IGNEOUS	VOLCANIC	BASALT	2760	0	47.8	1	15.9		13.9			0.19	6.78	9.78	3.04	0.12	0.16	1.01	3	8.9	1.3	6.8	2.1	0.9	3.1	0.6	4	0.8	2.5	0.4	2.6	0.4		272	240		120			54		31	0.2	0.21
S112	GEOROC	MTORO, M.; MABOKO, M. A. H.; MANYA, S., 2009	-1.73	33.65	IGNEOUS	VOLCANIC	BASALT	2760	0	50.6	1.24	15		13.5			0.19	5.92	10.4	1.66	0.09	0.19	0.9	4.2	12	1.7	8.9	2.7	1.2	3.9	0.8	4.9	1	3	0.5	3.1	0.5		298	130		80			74		13	0.2	0.11
S113	GEOROC	MTORO, M.; MABOKO, M. A. H.; MANYA, S., 2009	-1.73	33.65	IGNEOUS	VOLCANIC	BASALT	2760	0	48.9	0.93	14.5		13.1			0.2	6.62	10.6	2.78	0.3	0.14	1.61	3	8.6	1.2	6.6	2.1	0.8	3	0.6	3.8	0.8	2.4	0.4	2.5	0.4		263	180		80			52		58	0.2	0.08
S116	GEOROC	MTORO, M.; MABOKO, M. A. H.; MANYA, S., 2009	-1.73	33.65	IGNEOUS	VOLCANIC	BASALT	2760	0	48.2	1.31	16.2		13.9			0.19	5.6	7.71	4	0.6	0.11	1.93	3.4	8.8	1.5	7.3	2.3	1	2.9	0.5	2.8	0.5	1.5	0.2	1.4	0.2		158	80		110			40		140	0.1	0.1
S117	GEOROC	MTORO, M.; MABOKO, M. A. H.; MANYA, S., 2009	-1.73	33.65	IGNEOUS	VOLCANIC	BASALT	2760	0	49.2	0.56	14.7		10.5			0.17	7.69	11.2	2.27	0.21	0.08	3	2.2	6.1	0.8	4.1	1.3	0.6	1.8	0.4	2.4	0.5	1.5	0.2	1.5	0.2		208	370		100			29		60	0.1	0.1
S118	GEOROC	MTORO, M.; MABOKO, M. A. H.; MANYA, S., 2009	-1.73	33.65	IGNEOUS	VOLCANIC	ANDESITE	2760	0	53.6	0.69	16.8		9.28			0.18	4.05	10	3.97	0.06	0.06	0.88	2.1	6.1	0.9	4.6	1.5	0.7	2.1	0.4	2.7	0.6	1.6	0.2	1.6	0.2		228	250		140			34		36	0.1	0.06
S122	GEOROC	MTORO, M.; MABOKO, M. A. H.; MANYA, S., 2009	-1.73	33.65	IGNEOUS	VOLCANIC	BASALT	2760	0	48.2	1.33	14.4		16.5			0.21	6.63	8.6	2.68	0.19	0.19	0.7	4.2	12	1.7	9.1	2.7	1.1	3.8	0.7	4.7	1	2.9	0.4	3.1	0.5		412	30		50			64		59	0.2	0.14
S129	GEOROC	MTORO, M.; MABOKO, M. A. H.; MANYA, S., 2009	-1.73	33.65	IGNEOUS	VOLCANIC	BASALT	2760	0	49.8	1.08	14.3		14.5			0.19	5.37	10.7	2.28	0.14	0.14	1.2	3.6	10.4	1.5	7.9	2.4	1	3.4	0.7	4.3	0.9	2.7	0.4	2.8	0.4		265	110		70			59		51	0.2	0.11
S141	GEOROC	MTORO, M.; MABOKO, M. A. H.; MANYA, S., 2009	-1.73	33.65	IGNEOUS	VOLCANIC	ANDESITE	2760	0	52.3	0.77	15.8		10			0.21	5.81	11	2.74	0.04	0.09	0.85	4.4	11.9	1.6	8	2.3	0.9	3.2	0.6	3.8	0.8	2.3	0.3	2.3	0.4		238	210		120			55		41	0.2	0.14
S142	GEOROC	MTORO, M.; MABOKO, M. A. H.; MANYA, S., 2009	-1.73	33.65	IGNEOUS	VOLCANIC	BASALT	2760	0	47.1	0.84	15.7		13.3			0.19	7.32	11.5	2.25	0.15	0.12	1.23	3.1	8.9	1.2	6.5	2	0.8	2.8	0.6	3.6	0.8	2.2	0.3	2.2	0.4		250	270		130			49		39	0.2	0.29
S16	GEOROC	MTORO, M.; MABOKO, M. A. H.; MANYA, S., 2009	-1.73	33.65	IGNEOUS	VOLCANIC	BASALT	2760	0	49.2	0.82	13.7		13.7			0.2	6.26	12.2	2.36	0.02	0.14	1.19	3	8	1.2	6.5	2.1	0.8	2.9	0.5	3.6	0.8	2.3	0.4	2.3	0.4		269	210		80			53		15	0.1	0.1
S27	GEOROC	MTORO, M.; MABOKO, M. A. H.; MANYA, S., 2009	-1.73	33.65	IGNEOUS	VOLCANIC	BASALT	2760	0	48.6	0.71	15.5		11.3			0.3	7.58	11.8	1.96	0.11	0.08	1.67	3.1	8.4	1.3	6.3	1.9	0.7	2.5	0.5	2.9	0.6	1.8	0.3	1.8	0.3		227	360		110			45		76	0.1	0.8
S30	GEOROC	MTORO, M.; MABOKO, M. A. H.; MANYA, S., 2009	-1.73	33.65	IGNEOUS	VOLCANIC	ANDESITE	2760	0	52.3	0.73	15.9		8.82			0.2	5.47	12.4	2.05	0.06	0.1	1.69	3.3	9.1	1.2	6.2	1.8	0.8	2.4	0.5	2.9	0.6	1.9	0.3	1.7	0.3		218	360		100			43		31	0.2	0.16
S31	GEOROC	MTORO, M.; MABOKO, M. A. H.; MANYA, S., 2009	-1.73	33.65	IGNEOUS	VOLCANIC	ANDESITE	2760	0	53.6	0.8	15.4		10.4			0.26	5.2	11.2	1.12	0.04	0.09	1.58	3.1	8.8	1.2	6.4	2	0.8	2.6	0.5	3.3	0.7	2.2	0.3	2.1	0.3		241	150		90			46		14	0.2	0.13
S33	GEOROC	MTORO, M.; MABOKO, M. A. H.; MANYA, S., 2009	-1.73	33.65	IGNEOUS	VOLCANIC	BASALT	2760	0	47.8	0.71	15.1		12.3			0.28	6.99	11.6	1.61	0.2	0.1	2.99	4	10.9	1.5	7.2	2.1	0.8	2.8	0.5	3.4	0.8	2.3	0.3	2.2	0.4		220	180		120			47		81	0.2	0.17
S34	GEOROC	MTORO, M.; MABOKO, M. A. H.; MANYA, S., 2009	-1.73	33.65	IGNEOUS	VOLCANIC	ANDESITE	2760	0	54.8	0.87	15.9		9.06			0.22	4.42	10.6	2.93	0.16	0.12	0.61	3.9	10.5	1.4	7.4	2.2	0.9	2.9	0.5	3.5	0.8	2.3	0.3	2.3	0.3		251	280		130			53		68	0.2	0.15
S41	GEOROC	MTORO, M.; MABOKO, M. A. H.; MANYA, S., 2009	-1.73	33.65	IGNEOUS	VOLCANIC	BASALT	2760	0	50.6	1.06	14.4		14.6			0.22	4.54	11.4	1.62	0.12	0.14	0.93	3.5	10.1	1.4	7.6	2.4	1	3.3	0.6	4.2	0.9	2.8	0.4	2.7	0.4		262	120		80			59		76	0.2	0.12
S79	GEOROC	MTORO, M.; MABOKO, M. A. H.; MANYA, S., 2009	-1.73	33.65	IGNEOUS	VOLCANIC	BASALT	2760	0	51.3	0.88	14.6		10.1			0.2	4.83	9.85	5	0.45	0.13	2.31	3.4	9.1	1.4	7	2.3	0.9	3.3	0.6	3.8	0.8	2.4	0.4	2.3	0.4		271	140		90			53		171	0.1	0.2
S88	GEOROC	MTORO, M.; MABOKO, M. A. H.; MANYA, S., 2009	-1.73	33.65	IGNEOUS	VOLCANIC	BASALT	2760	0	47.6	0.76	16.3		12.9			0.17	9.11	8.71	1.81	0.1	0.09	2	1.8	5.4	0.8	4.3	1.4	0.6	1.9	0.4	2.6	0.5	1.6	0.2	1.6	0.2		222	80		70			34		15	0.1	0.06
S94	GEOROC	MTORO, M.; MABOKO, M. A. H.; MANYA, S., 2009	-1.73	33.65	IGNEOUS	VOLCANIC	BASALT	2760	0	51.6	0.85	13.9		14			0.2	5.95	9.46	2.17	0.51	0.11	1.02	2.3	6.7	0.9	4.9	1.5	0.6	2.3	0.4	2.9	0.6	1.9	0.3	1.9	0.3		217	40		50			38		46	0.1	0.17
S96	GEOROC	MTORO, M.; MABOKO, M. A. H.; MANYA, S., 2009	-1.73	33.65	IGNEOUS	VOLCANIC	ANDESITE	2760	0	52.2	0.8	13.4		12.3			0.19	5.43	11.2	2.98	0.16	0.11	0.96	2.9	7.6	1.2	5.9	1.9	0.8	2.9	0.5	3.5	0.7	2.2	0.4	2.3	0.4		267	60		80			49		34	0.1	0.1
S98	GEOROC	MTORO, M.; MABOKO, M. A. H.; MANYA, S., 2009	-1.73	33.65	IGNEOUS	VOLCANIC	BASALT	2760	0	50.9	0.81	13.9		13.6			0.22	5.57	10.1	2.85	0.21	0.11	1.39	2.9	8	1.2	6.1	1.9	0.8	2.9	0.5	3.5	0.8	2.4	0.4	2.3	0.4		259	90		150			49		48	0.1	0.1
S14	GEOROC	MTORO, M.; MABOKO, M. A. H.; MANYA, S., 2009	-1.73	33.65	IGNEOUS	VOLCANIC	BASALT	2755	0	50.1	1.02	15.5		12.8			0.26	4.97	11.3	1.61	0.17	0.15	0.8	3.5	9.5	1.5	7.43	2.41	1	3.4	0.6	4.3	0.9	2.7	0.4	2.7	0.4		292	190		100			62		63	0.2	0.1
S143	GEOROC	MTORO, M.; MABOKO, M. A. H.; MANYA, S., 2009	-1.73	33.65	IGNEOUS	VOLCANIC	BASALT	2755	0	48.7	1.03	15.6		14			0.18	5.88	11	2.41	0.15	0.15	0.55	3.4	9.2	1.4	6.92	2.27	1	3.2	0.6	4	0.9	2.7	0.4	2.6	0.4		295	150		80			58		45	0.2	2.7
3	GEOROC	BLAKE, T. S., 2001	-22	120	IGNEOUS	VOLCANIC	BASALT	2750	30	52.7	1.21	9.3		20.6			0.16	10.7	5.2			0.2		35.9	77.1		39.5									1.6		24	186	840	82	334			104		38		0.6
4	GEOROC	BLAKE, T. S., 2001	-22	120	IGNEOUS	VOLCANIC	BASALT	2750	30	53.1	1.39	14.1		11.8			0.17	5.2	9.1	3.1	1.8	0.29		51	102.5		39.1									4.4		28	202	50	45	511			374		1550		2.3
10	GEOROC	BLAKE, T. S., 2001	-22	120	IGNEOUS	VOLCANIC	NOT-GIVEN	2750	30	54.5	1.66	13.1		14.2			0.17	5.1	8.1	2.7	0.2	0.2		9.9	23.8		13.9									2.9		32	242	128	42	79			110		48		0.4
11	GEOROC	BLAKE, T. S., 2001	-22	120	IGNEOUS	VOLCANIC	BASALT	2750	30	53.4	1.33	13		13.11			0.19	6.7	9	2.5	0.7	0.2		20.3	46.5		23.4									1.9		25	209	355	52	148			115		743		0.2
15	GEOROC	BLAKE, T. S., 2001	-22	120	IGNEOUS	VOLCANIC	DOLERITE	2750	30	52.9	1.16	5.9		16.4			0.28	12.2	9.3	1.3	0.6	0.12		29.1	63.5		29.4									1.4		21	141	982	78	432			105		145		0.6
18	GEOROC	BLAKE, T. S., 2001	-22	120	IGNEOUS	VOLCANIC	BASALT	2750	30	51.3	1.86	14.3		14			0.16	5.6	9.5	2.4	0.6	0.25		21.6	48.6		23.1									3.1		28	204	173	46	89			202		162		1.1
19	GEOROC	BLAKE, T. S., 2001	-22	120	IGNEOUS	VOLCANIC	DOLERITE	2750	30	49.9	1.71	13.8		13.3			0.17	6.2	11.1	2.2	1.5	0.17		25.7	54.8		26.8									2.6		30	278	76	46	123			173		370		1.2
U911/1	GEOROC	BLAKE, T. S., 2001	-22	120	IGNEOUS	VOLCANIC	DOLERITE	2750	30	52.6	3.83	13.5		17.2			0.22	4.6	6.5	2.6	2.6	0.7		46.3	107.9		54									5.5		28	342		42	39			448		422		1.3
U911/1	GEOROC	BLAKE, T. S., 2001	-22	120	IGNEOUS	VOLCANIC	DOLERITE	2750	30	48	3.65	13		16.6			0.24	4.1	7.3	2.6	2.7	0.6		41.9	97.9		56									5.1		25	331	35	47	24			397		390		1.3
U912/30	GEOROC	BLAKE, T. S., 2001	-22	120	IGNEOUS	VOLCANIC	DOLERITE	2750	30	51.6	1.74	13.4		12.4			0.18	6.3	9	2.2	1.5	0.2		23.9	52.2		26.9									2.2		34	284	81	59	95			162		286		1.2
U912/30	GEOROC	BLAKE, T. S., 2001	-22	120	IGNEOUS	VOLCANIC	DOLERITE	2750	30	51.3	1.69	12.8		12.1			0.18	6.3	7.4	2.2	1.5	0.2		25.8	56.2		25.3									2.6		26	306	79	50	108			177		306		1.4
U913/38	GEOROC	BLAKE, T. S., 2001	-22	120	IGNEOUS	VOLCANIC	DOLERITE	2750	30	50.1	1.11	5.8		15.4			0.25	11.5	12.4	1.4	0.7	0.1		24.7	54.5		25.9									1.3		17	149	1140	93	472			96		148		0.5
U913/38	GEOROC	BLAKE, T. S., 2001	-22	120	IGNEOUS	VOLCANIC	DOLERITE	2750	30	48.8	1.02	5.6		14.1			0.25	11.3	10.1	1.3	0.7	0.1		31.7	68.3		29.3									1.6		18	136	920	71	442			101		182		0.8
U920/1	GEOROC	BLAKE, T. S., 2001	-22	120	IGNEOUS	VOLCANIC	BASALT	2750	30	52	1.23	14.1		11.3			0.16	4.9	7	2.9	3.2	0.3		46.7	92.1		38.3									4.7		22	222	30	51	34			331		1242		2.3
U920/1	GEOROC	BLAKE, T. S., 2001	-22	120	IGNEOUS	VOLCANIC	BASALT	2750	30	50.7	1.13	13.2		10.4			0.15	4.7	5.7	2.9	3.3	0.3		53.5	105.5		38.6									5.2		24	202		48	71			382		1408		2.2
U932/1	GEOROC	BLAKE, T. S., 2001	-22	120	IGNEOUS	VOLCANIC	BASALT	2750	30	47.7	1.1	14.3		11			0.15	5	11.4	3.2	0.1	0.2		11	24		12.9									2.5		32	207	293	45	92			103		10		0.5
U932/1	GEOROC	BLAKE, T. S., 2001	-22	120	IGNEOUS	VOLCANIC	BASALT	2750	30	47.1	0.99	14		11.4			0.17	5.3	9.2	2.8	0.1	0.1		13.9	29.7		14.4									3		32	212	228	48	98			134		16		0.7
141-2-TOH-93	GEOROC	PAPUNEN, H.; HALKOAHO, T.; LIIMATAINEN, J.; TULENHEIMO, T., 1998	64.237	29.0859	IGNEOUS	VOLCANIC	NOT-GIVEN	2750	50	52.49	0.82	20.3				6.89	0.09	7.47	1.84	5.28	4.62	0.19																	97		50	68	64
2004-19	GEOROC	POLAT, A.; LI, JIANGHAI; FRYER, B. J.; KUSKY, T. M.; GAGNON, J. E.; ZHANG, SHUANGQUAN, 2006	36.0612	117.571	IGNEOUS	VOLCANIC	BASALT	2750	50	51.49	0.58	11.69	11.84				0.19	10.77	11.31	1.9	0.18		0.7	2.72	6.15	0.83	3.75	1.15	0.43	1.67	0.3	2.03	0.43	1.22	0.18	1.14	0.17		25.7	875	54	225	24	27	28.1		19.2	0.09	0.12
2004-22	GEOROC	POLAT, A.; LI, JIANGHAI; FRYER, B. J.; KUSKY, T. M.; GAGNON, J. E.; ZHANG, SHUANGQUAN, 2006	36.061	117.569	IGNEOUS	VOLCANIC	BASALT	2750	50	51.78	0.36	7.06	10.27				0.19	16.76	12.5	0.77	0.3		0.91	1.36	2.81	0.46	2.11	0.63	0.24	0.87	0.15	1	0.21	0.6	0.09	0.58	0.09		10.7	2876	74	581	23	9	18.4		17.6	0.05	0.04
2004-24	GEOROC	POLAT, A.; LI, JIANGHAI; FRYER, B. J.; KUSKY, T. M.; GAGNON, J. E.; ZHANG, SHUANGQUAN, 2006	36.0633	117.573	IGNEOUS	VOLCANIC	BASALT	2750	50	49.65	0.93	15.07	13.69				0.21	7.07	10.72	2.46	0.12		0.3	2.63	6.73	1.01	5.14	1.73	0.71	2.56	0.45	3.1	0.66	1.86	0.27	1.75	0.26		26	220	54	102	29	74	28.6		26.1	0.09	0.41
2004-25	GEOROC	POLAT, A.; LI, JIANGHAI; FRYER, B. J.; KUSKY, T. M.; GAGNON, J. E.; ZHANG, SHUANGQUAN, 2006	36.0345	117.6	IGNEOUS	VOLCANIC	BASALT	2750	50	49.57	0.72	9.55	14.54				0.31	11.64	12.32	0.81	0.48		2.67	0.85	2.18	0.34	1.73	0.65	0.26	0.98	0.17	1.13	0.23	0.61	0.08	0.51	0.07		18.9	1591	93	497	13	29	7.2		36.1	0.03	0.03
2004-26	GEOROC	POLAT, A.; LI, JIANGHAI; FRYER, B. J.; KUSKY, T. M.; GAGNON, J. E.; ZHANG, SHUANGQUAN, 2006	36.0345	117.6	IGNEOUS	VOLCANIC	BASALT	2750	50	48.86	0.74	16.05	12.16				0.17	8.45	10.42	2.95	0.16		0.55	1.15	3.32	0.53	2.73	0.89	0.38	1.32	0.24	1.57	0.33	0.91	0.13	0.89	0.13		11.6	384	60	137	15	27	22.1		6.7	0.05	0.02
2004-27	GEOROC	POLAT, A.; LI, JIANGHAI; FRYER, B. J.; KUSKY, T. M.; GAGNON, J. E.; ZHANG, SHUANGQUAN, 2006	36.0345	117.6	IGNEOUS	VOLCANIC	BASALT	2750	50	48.19	0.75	16.32	12.55				0.17	8.33	10.69	2.75	0.17		0.7	1.78	5.42	0.85	4.37	1.44	0.58	2.12	0.38	2.53	0.54	1.53	0.22	1.44	0.22		26.1	394	58	144	25	43	35.1		10.3	0.09	0.04
2004-43	GEOROC	POLAT, A.; LI, JIANGHAI; FRYER, B. J.; KUSKY, T. M.; GAGNON, J. E.; ZHANG, SHUANGQUAN, 2006	36.423	117.38	IGNEOUS	VOLCANIC	BASALT	2750	50	50.99	0.84	14.38	13.21				0.22	6.93	10.9	2.26	0.21		1.21	2.59	5.57	1.04	5.29	1.79	0.63	2.42	0.42	2.82	0.61	1.85	0.26	1.78	0.25			147	58	108	157	77	19.2		51	0.1	0.03
2004-46A	GEOROC	POLAT, A.; LI, JIANGHAI; FRYER, B. J.; KUSKY, T. M.; GAGNON, J. E.; ZHANG, SHUANGQUAN, 2006	36.4283	117.466	IGNEOUS	VOLCANIC	BASALT	2750	50	51.72	0.77	14.48	12.96				0.2	6.5	9.79	2.83	0.67		0.76	4.38	9.07	1.3	5.92	1.78	0.61	2.2	0.38	2.6	0.56	1.76	0.26	1.74	0.26			172	51	97	36	80	20.9		150	0.09	0.07
2004-46B	GEOROC	POLAT, A.; LI, JIANGHAI; FRYER, B. J.; KUSKY, T. M.; GAGNON, J. E.; ZHANG, SHUANGQUAN, 2006	36.4283	117.466	IGNEOUS	VOLCANIC	BASALT	2750	50	51.63	0.75	14.17	13.06				0.2	6.82	9.93	2.74	0.64		0.7	3.05	6.91	1.04	4.91	1.47	0.53	1.94	0.34	2.3	0.49	1.55	0.22	1.53	0.23			188	57	109	35	53	15		118	0.07	0.04
2004-48	GEOROC	POLAT, A.; LI, JIANGHAI; FRYER, B. J.; KUSKY, T. M.; GAGNON, J. E.; ZHANG, SHUANGQUAN, 2006	36.4232	117.467	IGNEOUS	VOLCANIC	BASALT	2750	50	50.36	0.68	14.82	10.41				0.18	5.07	16.8	1.26	0.36		1.21	2.35	6.09	0.91	4.43	1.43	0.53	1.88	0.32	2.16	0.46	1.42	0.2	1.34	0.2			299	40	147	27	64	21.6		140	0.08	0.06
2004-49	GEOROC	POLAT, A.; LI, JIANGHAI; FRYER, B. J.; KUSKY, T. M.; GAGNON, J. E.; ZHANG, SHUANGQUAN, 2006	36.4232	117.467	IGNEOUS	VOLCANIC	BASALT	2750	50	51.13	0.73	15.34	10.49				0.18	6.2	12.99	2.49	0.41		0.96	2.6	6.3	1.01	5.01	1.62	0.61	2.14	0.37	2.48	0.53	1.61	0.23	1.55	0.23			327	49	151	37	27	17.9		392	0.09	0.04
C29	GEOROC	ZACHARIAH, J. K.; RAJAMANI, V.; HANSON, G. N., 1997	14.25	77.55	IGNEOUS	VOLCANIC	THOLEIITE	2750	0	53.68	0.94	14.6				11.46	0.17	8.01	10.18	1.04	0.28				26.48		15.32	3.48	0.961	3.31		3.24		2.01		1.87				288		126			63		45
C30	GEOROC	ZACHARIAH, J. K.; RAJAMANI, V.; HANSON, G. N., 1997	14.25	77.55	IGNEOUS	VOLCANIC	THOLEIITE	2750	0	48.11	0.52	16.74				12.08	0.15	12.63	6.89	2.54	0.16				23.4		11.28	2.32	0.795	2.15		2.03		1.2		1.14				600		500			33		62
C41	GEOROC	ZACHARIAH, J. K.; RAJAMANI, V.; HANSON, G. N., 1997	14.25	77.55	IGNEOUS	VOLCANIC	THOLEIITE	2750	0	54.09	0.85	10.65				12.7	0.19	8.64	11.37	1.11	0.13				24.15		13.26	3.23	1.035	3.44		3.45		1.96		1.75				700		182			61		16
C5	GEOROC	ZACHARIAH, J. K.; RAJAMANI, V.; HANSON, G. N., 1997	14.25	77.55	IGNEOUS	VOLCANIC	THOLEIITE	2750	0	53.51	1.01	15.74				11.02	0.16	5.69	10.13	2.81	0.17				30.88		17.26	3.87	1.301	3.81		3.69		2.19		2.02				176		94			82		82
C57	GEOROC	ZACHARIAH, J. K.; RAJAMANI, V.; HANSON, G. N., 1997	14.25	77.55	IGNEOUS	VOLCANIC	THOLEIITE	2750	0	54.42	1.28	16.01				12.17	0.17	4.83	8.06	3.59	0.29				39.28		22.19	4.99	1.614	4.84		4.68		2.66		2.38				169		104			87		67
E36	GEOROC	ZACHARIAH, J. K.; RAJAMANI, V.; HANSON, G. N., 1997	14.25	77.55	IGNEOUS	VOLCANIC	THOLEIITE	2750	0	50.61	0.97	14.77				12.19	0.22	6.47	11.78	2.59	0.3				10.75		8.07	2.57	0.948	3.49		4.31		2.85		2.77				212		128			60		64
E40	GEOROC	ZACHARIAH, J. K.; RAJAMANI, V.; HANSON, G. N., 1997	14.25	77.55	IGNEOUS	VOLCANIC	THOLEIITE	2750	0	52.46	0.7	15.06				9.98	0.17	8.06	11.56	1.85	0.1				5.51		4.68	1.61	0.64	2.24		2.77		1.78		1.7				274		142			43		39
E44	GEOROC	ZACHARIAH, J. K.; RAJAMANI, V.; HANSON, G. N., 1997	14.25	77.55	IGNEOUS	VOLCANIC	THOLEIITE	2750	0	54.19	0.7	14.45				9.78	0.17	7.22	11.44	1.96	0.09				7.32		5.9	1.85	0.689	2.49		3.12		2.05		1.99				301		106			43		35
W1	GEOROC	ZACHARIAH, J. K.; RAJAMANI, V.; HANSON, G. N., 1997	14.25	77.5	IGNEOUS	VOLCANIC	THOLEIITE	2750	0	49.7	1.01	15.28				12.11	0.2	7.31	9.87	2.69	0.06				10.6		7.73	2.43	0.825	3.25		3.83		2.48		2.42				225		119			55		36
W15	GEOROC	ZACHARIAH, J. K.; RAJAMANI, V.; HANSON, G. N., 1997	14.25	77.5	IGNEOUS	VOLCANIC	THOLEIITE	2750	0	49.17	1.34	16.69				17.25	1.34	10.12	2.21	1.72	0.12				11.47		8.97	3.01	1.112	4.06		5.04		3.29		3.18									72		38
W17-2	GEOROC	ZACHARIAH, J. K.; RAJAMANI, V.; HANSON, G. N., 1997	14.25	77.5	IGNEOUS	VOLCANIC	THOLEIITE	2750	0	51.44	0.89	14.82				12.17	0.2	8.01	10.51	1.63	0.1																			274		134			51		39
W17-3	GEOROC	ZACHARIAH, J. K.; RAJAMANI, V.; HANSON, G. N., 1997	14.25	77.5	IGNEOUS	VOLCANIC	THOLEIITE	2750	0	52.64	0.82	15				11.82	0.21	7.35	10.23	1.83	0.1																			257		149
W17-4	GEOROC	ZACHARIAH, J. K.; RAJAMANI, V.; HANSON, G. N., 1997	14.25	77.5	IGNEOUS	VOLCANIC	THOLEIITE	2750	0	51.07	0.81	15.23				11.81	0.2	7.82	11.15	1.63	0.1																								41
W17-5	GEOROC	ZACHARIAH, J. K.; RAJAMANI, V.; HANSON, G. N., 1997	14.25	77.5	IGNEOUS	VOLCANIC	THOLEIITE	2750	0	50.14	0.92	15.92				11.96	0.19	8.59	10.54	1.48	0.1				7.17		5.72	1.98	0.76	2.61		3.54		2.23		2.23				250		175			45		41
W17-6	GEOROC	ZACHARIAH, J. K.; RAJAMANI, V.; HANSON, G. N., 1997	14.25	77.5	IGNEOUS	VOLCANIC	THOLEIITE	2750	0	49.75	0.89	15.35				12.16	0.21	8.31	11.42	1.65	0.1																								45
W22	GEOROC	ZACHARIAH, J. K.; RAJAMANI, V.; HANSON, G. N., 1997	14.25	77.5	IGNEOUS	VOLCANIC	THOLEIITE	2750	0	49.95	0.86	15.49				11.7	0.2	7.81	12.61	1.07	0.02				6.9		5.67	1.96	0.772	2.74		3.38		2.23		2.16				228		170			54		14
W25	GEOROC	ZACHARIAH, J. K.; RAJAMANI, V.; HANSON, G. N., 1997	14.25	77.5	IGNEOUS	VOLCANIC	THOLEIITE	2750	0	51.97	0.92	15.16				11.97	0.19	7.47	9.77	2.12	0.07				8.08		6.34	2.15	0.833	2.9		3.61		2.36		2.3				244		134			53		26
W46	GEOROC	ZACHARIAH, J. K.; RAJAMANI, V.; HANSON, G. N., 1997	14.25	77.5	IGNEOUS	VOLCANIC	THOLEIITE	2750	0	48.67	0.84	15.62				12.08	0.21	8.15	10.49	1.98					7.17		5.61	1.87	0.657	2.48		3.1		2		1.98				269		138			37		14
W47	GEOROC	ZACHARIAH, J. K.; RAJAMANI, V.; HANSON, G. N., 1997	14.25	77.5	IGNEOUS	VOLCANIC	THOLEIITE	2750	0	49.9	0.85	15.88				12.31	0.22	6.43	12.31	1.43	0.04				7.81		6.04	2.03	0.835	2.75		3.38		2.23		2.23				311		148			40		54
W49	GEOROC	ZACHARIAH, J. K.; RAJAMANI, V.; HANSON, G. N., 1997	14.25	77.5	IGNEOUS	VOLCANIC	THOLEIITE	2750	0	50.11	0.9	16.25				12.24	0.21	7.25	11.39	1.33					7.59		6.08	2.08	0.816	2.82		3.67		2.33		2.28				292		159			46		20
W51	GEOROC	ZACHARIAH, J. K.; RAJAMANI, V.; HANSON, G. N., 1997	14.25	77.5	IGNEOUS	VOLCANIC	THOLEIITE	2750	0	50.88	0.74	15.86				12.26	0.2	7.8	9.01	3.06	0.1				8.31		6.49	2.18	0.835	2.97		3.65		2.3		2.18				249		126			40		35
W52	GEOROC	ZACHARIAH, J. K.; RAJAMANI, V.; HANSON, G. N., 1997	14.25	77.5	IGNEOUS	VOLCANIC	THOLEIITE	2750	0	49.33	0.92	15.71				12.22	0.21	6.26	13.3	1.84	0.14				8.07		6.48	2.24	0.868	3.05		3.84		2.51		2.41				272		135			56		36
W54	GEOROC	ZACHARIAH, J. K.; RAJAMANI, V.; HANSON, G. N., 1997	14.25	77.5	IGNEOUS	VOLCANIC	THOLEIITE	2750	0	53.94	0.6	12.58				12.69	0.21	8.58	9.17	1.58																									73
Z10	GEOROC	ZACHARIAH, J. K.; RAJAMANI, V.; HANSON, G. N., 1997	14.25	77.55	IGNEOUS	VOLCANIC	THOLEIITE	2750	0	49.36	0.51	16.56				11.63	0.14	5.27	10.37	2.84	0.91																			220		141			45		350
Z21	GEOROC	ZACHARIAH, J. K.; RAJAMANI, V.; HANSON, G. N., 1997	14.25	77.55	IGNEOUS	VOLCANIC	THOLEIITE	2750	0	54.27	1	12.96				12.52	0.19	6.08	12.21	0.53	0.04																			163		105			64		16
Z23	GEOROC	ZACHARIAH, J. K.; RAJAMANI, V.; HANSON, G. N., 1997	14.25	77.55	IGNEOUS	VOLCANIC	THOLEIITE	2750	0	50.74	3.9	12.42				16.17	0.21	4.29	7.36	3.36	1.14																			68		69			205		756
Z26	GEOROC	ZACHARIAH, J. K.; RAJAMANI, V.; HANSON, G. N., 1997	14.25	77.55	IGNEOUS	VOLCANIC	THOLEIITE	2750	0	52.27	1.25	13.89				13.82	0.22	6.08	9.61	1.36	0.97																			130		80			88		144
Z27	GEOROC	ZACHARIAH, J. K.; RAJAMANI, V.; HANSON, G. N., 1997	14.25	77.55	IGNEOUS	VOLCANIC	THOLEIITE	2750	0	52.29	1.6	14.06				13.13	0.18	4.94	8.75	4.41	0.18																			136		91			150		90
Z37	GEOROC	ZACHARIAH, J. K.; RAJAMANI, V.; HANSON, G. N., 1997	14.25	77.55	IGNEOUS	VOLCANIC	THOLEIITE	2750	0	51.05	0.86	15.02				12.57	0.19	8.06	9.01	1.85	0.13																			240		132			42		41
Z39	GEOROC	ZACHARIAH, J. K.; RAJAMANI, V.; HANSON, G. N., 1997	14.25	77.55	IGNEOUS	VOLCANIC	THOLEIITE	2750	0	53.27	0.99	13.52				12.5	0.19	6.56	10.15	2.14	0.6																			171		121			44		139
Z47	GEOROC	ZACHARIAH, J. K.; RAJAMANI, V.; HANSON, G. N., 1997	14.25	77.55	IGNEOUS	VOLCANIC	THOLEIITE	2750	0	46.2	0.79	14.7				11.4	0.2	5.95	11.4	1.32	0.04				7.81		6.04	2.03	0.835	2.75		3.38		2.23		2.23				311		148			40		54
Z49	GEOROC	ZACHARIAH, J. K.; RAJAMANI, V.; HANSON, G. N., 1997	14.25	77.55	IGNEOUS	VOLCANIC	THOLEIITE	2750	0	47.5	0.85	15.4				11.6	0.2	6.87	10.8	1.26					7.59		6.08	2.08	0.816	2.82		3.67		2.33		2.28				292		159			46		20
Z50	GEOROC	ZACHARIAH, J. K.; RAJAMANI, V.; HANSON, G. N., 1997	14.25	77.55	IGNEOUS	VOLCANIC	THOLEIITE	2750	0	47.2	0.67	14.8				10.8	0.17	8.38	8.74	2.47	0.03				7.1		5.11	1.67	0.655	2.27		2.78		1.83		1.79				290		178			34		66
1	GEOROC	BLAKE, T. S., 2001	-22	120	IGNEOUS	VOLCANIC	BASALT	2745	30	54.3	1.12	15.4		12.7			0.18	4.1	7.9	3.8	0.4	0.16		21.3	45.4		20.4									2		22	175	84	54	142			143		297		0.9
8.1	GEOROC	PAPUNEN, H.; HALKOAHO, T.; LUUKKONEN, E:, 2009	64.2784	29.0686	IGNEOUS	VOLCANIC	NOT-GIVEN	2745	35	54.3	0.65	16.9		9.7			0.25	4.7	9.32	3.7	0.37	0.12		14	33														86	84	18	73	82	6	128	19	105
8.2	GEOROC	PAPUNEN, H.; HALKOAHO, T.; LUUKKONEN, E:, 2009	64.2784	29.0686	IGNEOUS	VOLCANIC	BASALT	2745	35	50.2	1.56	9.58		13.2			0.41	11.2	11.9	1.47	0.16	0.12		9	15														250	690	49	253	137	23	113	22
19.2	GEOROC	PAPUNEN, H.; HALKOAHO, T.; LUUKKONEN, E:, 2009	64.2798	29.07	IGNEOUS	VOLCANIC	BASALT	2745	35	50.7	0.63	10.6		13.6			0.48	11	9.84	1.77	1.13	0.05			3														210	769	46	265	228	13	45	13	216
19.4	GEOROC	PAPUNEN, H.; HALKOAHO, T.; LUUKKONEN, E:, 2009	64.2798	29.07	IGNEOUS	VOLCANIC	BASALT	2745	35	47	0.71	11.6		16.9			0.48	11.2	8.74	1.05	2.07	0.03		10	16														214	853	50	273	232	21	47	19	380
44.1	GEOROC	PAPUNEN, H.; HALKOAHO, T.; LUUKKONEN, E:, 2009	64.2836	29.0756	IGNEOUS	VOLCANIC	BASALT	2745	35	47.7	0.51	9.3		18.7			0.33	11.1	9.8	0.88	1.44	0.03		1	6														184	1278	41	328	99	6	21	23	244
46.1	GEOROC	PAPUNEN, H.; HALKOAHO, T.; LUUKKONEN, E:, 2009	64.2835	29.0762	IGNEOUS	VOLCANIC	BASALT	2745	35	49.8	1.7	14.8		13.3			0.3	6.6	9.72	2.49	1.06	0.16		8	26														307	151	35	52	119	39	109	20	258
50.1	GEOROC	PAPUNEN, H.; HALKOAHO, T.; LUUKKONEN, E:, 2009	64.3101	29.086	IGNEOUS	VOLCANIC	BASALT	2745	35	46.8	0.72	11.7		19.5			0.54	8.65	8.21	1.39	2	0.02		7															230	3138	33	133	610	49	25	31	481
52.2	GEOROC	PAPUNEN, H.; HALKOAHO, T.; LUUKKONEN, E:, 2009	64.3083	29.0869	IGNEOUS	VOLCANIC	BASALT	2745	35	50.2	1.57	9.6		16.7			0.42	10.1	9.07	1.2	0.87	0.12		6	8														254	666	33	220	132	40	112	19	183
53.2	GEOROC	PAPUNEN, H.; HALKOAHO, T.; LUUKKONEN, E:, 2009	64.3083	29.0873	IGNEOUS	VOLCANIC	BASALT	2745	35	49	1.13	14.7		14.3			0.44	7.28	8.71	0.54	3.8	0.08		1	10														293	195	43	103	500	120	60	17	2425
54.1	GEOROC	PAPUNEN, H.; HALKOAHO, T.; LUUKKONEN, E:, 2009	64.3092	29.0865	IGNEOUS	VOLCANIC	ANDESITE	2745	35	53.7	0.95	16.4		11.3			0.3	5.68	6.04	3.53	1.97	0.06		15	20														172	161	26	59	546	14	72	18	462
57.1	GEOROC	PAPUNEN, H.; HALKOAHO, T.; LUUKKONEN, E:, 2009	64.3083	29.0921	IGNEOUS	VOLCANIC	BASALT	2745	35	51.7	1.38	14.4		13.49			0.21	7.34	9.26	1.86	0.22	0.13			21														129	96	40	137	153	52	77	19	2
27974	GEOROC	SPROULE, R. A.; LESHER, C. M.; AYER, J. A.; THURSTON, P. C.; HERZBERG, C. T., 2002	48	-80	IGNEOUS	VOLCANIC	BASALT	2745	5	47.97	0.29	9.31				10.36	0.19	23.5	7.76	0.01	0.02	0.03	5.88	0.27	0.96	0.17	1.07	0.47	0.17	0.76	0.14	1.19	0.26	0.86	0.11	0.93	0.15		167	3170	57.4	691	116	57.4	12.8				0.01
JP01-116-G	GEOROC	PARKS, JEN; LIN, SHOUFA; DAVIS, D. W.; YANG, XUEMING; CREASER, R. A.; CORKERY, M. T., 2014	53.7732	-94.1114	IGNEOUS	VOLCANIC	BASALT	2744	0	53.9279	0.88431	15.5398		8.82164			0.185662	4.68985	13.2968	2.61859		0.075123	7.01	2.69627	6.84428	1.03814	5.51031	1.88662	0.790605	2.79546	0.539901	3.19841	0.691989	2.00917	0.299844	1.87926	0.288802	44	284.098	188.946	47.4436	107.501	66.1624	159.393	38.6984		33	0.113977	0.052494
JP01-246-G	GEOROC	PARKS, JEN; LIN, SHOUFA; DAVIS, D. W.; YANG, XUEMING; CREASER, R. A.; CORKERY, M. T., 2014	53.8186	-94.1126	IGNEOUS	VOLCANIC	BASALT	2744	0	52.1642	1.08208	14.3081		15.0034			0.207446	4.69836	9.74434	2.06324	0.627943	0.100919	10.59	5.08949	10.7554	1.37628	3.17728	1.13375	0.720691	2.74687	0.541136	3.32841	0.725359	2.19185	0.343823	2.22774	0.346874	37	272.013	28.3271	55.9791	50.3656	101.956	166.509	60.9677		192	0.202942	0.404609
JP01-67-G	GEOROC	PARKS, JEN; LIN, SHOUFA; DAVIS, D. W.; YANG, XUEMING; CREASER, R. A.; CORKERY, M. T., 2014	53.8298	-94.0928	IGNEOUS	VOLCANIC	BASALT	2744	0	52.2386	1.03265	14.5379		13.1979			0.213762	6.95523	8.84824	2.91396		0.095714	4.84	3.51018	8.78665	1.3219	7.01691	2.38828	0.628845	3.3616	0.648667	3.94793	0.85657	2.47911	0.390534	2.40031	0.375089	43	322.916	152.587	49.0833	118.256	102.097	109.908	51.3139		16	0.155167	0.09042
JP01-82-G	GEOROC	PARKS, JEN; LIN, SHOUFA; DAVIS, D. W.; YANG, XUEMING; CREASER, R. A.; CORKERY, M. T., 2014	53.8325	-94.1025	IGNEOUS	VOLCANIC	BASALT	2744	0	51.3668	0.68833	14.8315		13.4482			0.198705	8.56296	10.3634	0.461082	0.021956	0.05489	8.01	1.75111	4.59749	0.718406	3.94844	1.40189	0.721899	1.8587	0.39209	2.45974	0.535124	1.54339	0.247574	1.50561	0.232534	39	220.612	288.482	47.5055	147	58	141	27.7346		5	0.076652	0.046029
JP02-266	GEOROC	PARKS, JEN; LIN, SHOUFA; DAVIS, D. W.; YANG, XUEMING; CREASER, R. A.; CORKERY, M. T., 2014	53.8172	-94.1217	IGNEOUS	VOLCANIC	BASALT	2744	0	50.1249	0.622268	8.66805		12.0499			0.199792	16.1707	10.9261	1.11342	0.083246	0.041623	3.13	1.60642	4.19428	0.654817	3.80605	1.44522	0.472175	1.76216	0.358465	2.24283	0.475261	1.30628	0.195673	1.13157	0.172746	52	220.454	1590	62.2043	317	50	68	27.9385		27	0.062534	0.157847
JP02-289	GEOROC	PARKS, JEN; LIN, SHOUFA; DAVIS, D. W.; YANG, XUEMING; CREASER, R. A.; CORKERY, M. T., 2014	53.8113	-94.1433	IGNEOUS	VOLCANIC	BASALT	2744	0	52.9839	0.926464	14.2713		12.8185			0.208985	6.78364	9.61109	2.25749	0.078229	0.067054	10.18	2.32367	5.99673	0.918744	11.1445	1.93117	0.706221	2.1404	0.428688	2.85279	0.616756	1.77121	0.277248	1.71302	0.271392	44	259.073	128.059	43.709	103	71	193	41.8834		24	0.097768	0.079809
27982	GEOROC	SPROULE, R. A.; LESHER, C. M.; AYER, J. A.; THURSTON, P. C.; HERZBERG, C. T., 2002	47.5843	-81.2449	IGNEOUS	VOLCANIC	BASALT	2742.5	7.5	51.11	0.45	14.75				10.03	0.25	12.91	7.56	1.42	1.39	0.04	3.29	0.7	1.91	0.34	2.17	0.94	0.67	1.54	0.31	2.26	0.56	1.65	0.27	1.8	0.29		229	513	56.9	95.2	59	24.8	22.6				0.01
82GRS-0254	GEOROC	HOLLINGS, P.; STOTT, G. M.; WYMAN, D. A., 2000	51	-91	IGNEOUS	VOLCANIC	THOLEIITE	2742	2	46.56	1.14	16.43		14.91			0.18	7.25	10.96	2.26	0.25	0.05	0.7	3.43	9.38	1.41	7.07	2.49	0.88	3.08	0.54	3.72	0.82	2.31	0.34	2.13	0.31	36	289	186	63	105			61		58	0.27	0.1
SIN 01	GEOROC	MANYA, S.; MABOKO, M. A. H., 2008	-4.4597	34.8278	IGNEOUS	VOLCANIC	BASALT	2742	0	49.2	1.26	13.8		14.1			0.25	4.21	12.3	1.86	0.18	0.22	2.17	3.7	9.9	1.63	8.9	2.9	1.13	4.1	0.8	4.9	1	3.1	0.47	3	0.46	41.3	317	200	63	120	130		68		111	0.2	0.1
82GRS-0056	GEOROC	HOLLINGS, P.; STOTT, G. M.; WYMAN, D. A., 2000	51	-91	IGNEOUS	VOLCANIC	BASALT	2740	0	47.93	0.31	11.49		10.96			0.26	12.32	15.56	0.57	0.49	0.09	3.41	6.71	13.37	1.59	5.79	1.46	0.44	1.39	0.24	1.69	0.33	0.99	0.14	1.11	0.17	22	98	880	77	566			57		120	0.18	0.43
82GRS-0088	GEOROC	HOLLINGS, P.; STOTT, G. M.; WYMAN, D. A., 2000	51	-91	IGNEOUS	VOLCANIC	THOLEIITE	2740	0	50.81	0.84	14.3		12.78			0.19	6.98	12.17	1.62	0.21	0.1	0.4	2.83	7.02	1.07	5.28	1.83	0.71	2.8	0.48	3.52	0.73	2.19	0.34	2.23	0.27	55	357	364	60	117			44		72	0.14	0.1
82GRS-0106	GEOROC	HOLLINGS, P.; STOTT, G. M.; WYMAN, D. A., 2000	51	-91	IGNEOUS	VOLCANIC	THOLEIITE	2740	0	48.57	1.9	12.52		19.09			0.22	5.36	8.34	3.46	0.42	0.11		6.61	20.36	2.9	15.36	4.8	1.69	5.01	0.84	5.14	1.01	2.74	0.4	2.6	0.34	22	308	43	70	65			127		50	0.63	0.31
82GRS-0186	GEOROC	HOLLINGS, P.; STOTT, G. M.; WYMAN, D. A., 2000	51	-91	IGNEOUS	VOLCANIC	THOLEIITE	2740	0	50.12	0.72	15.07		12.4			0.19	7.28	12.61	1.35	0.17	0.09	2.15	1.87	4.85	0.73	3.83	1.5	0.58	2.11	0.42	3.05	0.66	1.88	0.3	2	0.27	55	334	437	62	146			40		27	0.13	0.07
82GRS-0204	GEOROC	HOLLINGS, P.; STOTT, G. M.; WYMAN, D. A., 2000	51	-91	IGNEOUS	VOLCANIC	THOLEIITE	2740	0	51.43	0.73	14.78		12.52			0.18	7.54	11.29	1.25	0.22	0.05	1.11	1.95	4.96	0.75	4.15	1.61	0.6	2.38	0.46	3.18	0.72	2	0.32	2.17	0.3	49	307	374	58	127			38		43	0.12	0.06
82GRS-0292	GEOROC	HOLLINGS, P.; STOTT, G. M.; WYMAN, D. A., 2000	51	-91	IGNEOUS	VOLCANIC	THOLEIITE	2740	0	48.27	0.95	15.07		13.24			0.19	8.44	11.92	1.62	0.24	0.05	0.6	2.71	7.26	1.21	6.21	2.31	0.87	2.97	0.53	3.63	0.76	2.28	0.34	2.25	0.29	39	266	307	59	137			46		101	0.18	0.08
82GRS-0405	GEOROC	HOLLINGS, P.; STOTT, G. M.; WYMAN, D. A., 2000	51	-91	IGNEOUS	VOLCANIC	THOLEIITE	2740	0	48.41	0.69	14.06		13.04			0.25	6.85	13.45	2.5	0.69	0.05	0.71	2.9	7.25	1.11	5.5	1.75	0.63	2.4	0.44	2.86	0.61	1.82	0.26	1.84	0.25	51	323	493	67	165			40		120	0.16	0.31
82GRS-1026	GEOROC	HOLLINGS, P.; STOTT, G. M.; WYMAN, D. A., 2000	51	-91	IGNEOUS	VOLCANIC	THOLEIITE	2740	0	49.88	0.73	15.16		12.29			0.18	8.04	12.6	0.89	0.18	0.05	0.5	2.3	5.78	0.84	4.44	1.58	0.63	2.31	0.43	3.01	0.68	2.07	0.3	2.04	0.29	68	309	378	56	134			41		45	0.23	0.09
82GRS-1187	GEOROC	HOLLINGS, P.; STOTT, G. M.; WYMAN, D. A., 2000	51	-91	IGNEOUS	VOLCANIC	THOLEIITE	2740	0	47.68	2.22	13.14		19.87			0.25	4.38	9.49	2.48	0.36	0.13	0.3	17.55	41.2	5.74	26	7.02	2.08	7.1	1.13	7.16	1.46	4.04	0.58	3.69	0.52	26	337	5	67	23			172		96	0.85	0.4
84GRS-0032	GEOROC	HOLLINGS, P.; STOTT, G. M.; WYMAN, D. A., 2000	51	-91	IGNEOUS	VOLCANIC	THOLEIITE	2740	0	49.95	1.78	14.78		15.2			0.23	6.33	7.66	3.82	0.12	0.11	0.3	5.74	15.15	2.35	11.95	3.95	1.28	4.36	0.79	5.14	1.07	2.93	0.42	2.76	0.39	45	404	58	56	46			103		86	0.35	0.2
84GRS-0239	GEOROC	HOLLINGS, P.; STOTT, G. M.; WYMAN, D. A., 2000	51	-91	IGNEOUS	VOLCANIC	THOLEIITE	2740	0	52.06	1.06	15.65		11.79			0.25	5.91	10.43	2.55	0.23	0.07	0.5	2.76	7.45	1.13	5.55	1.98	0.71	2.85	0.54	3.84	0.87	2.48	0.38	2.49	0.35	50	340	243	67	105			55		122	0.19	0.08
84GRS-1277	GEOROC	HOLLINGS, P.; STOTT, G. M.; WYMAN, D. A., 2000	51	-91	IGNEOUS	VOLCANIC	THOLEIITE	2740	0	48.85	0.84	15		13.34			0.29	6.98	12.26	2.21	0.17	0.05	0.5	2.66	6.99	1.05	5.22	1.74	0.65	2.28	0.41	2.92	0.64	1.86	0.28	1.81	0.26	42	268	273	62	157			37		52	0.15	0.19
R06	GEOROC	MANYA, S., 2004	-3.08	32.4	IGNEOUS	VOLCANIC	BASALT	2740	40	50.19	0.92	17.19		12.12			0.29	4.05	11.24	2.91	0.18	0.12	0.8	2.8	6.8	1.1	5.4	1.8	0.77	2.34	0.39	2.48	0.6	1.53	0.25	1.31	0.24	34	250	492	26.6	166			37.2		78	0.2
R07	GEOROC	MANYA, S., 2004	-3.08	32.4	IGNEOUS	VOLCANIC	BASALT	2740	40	49.07	0.93	15.71		12.76			0.28	4.5	13.24	1.9	0.16	0.14	1.1	2.8	6.5	1.06	5.2	1.6	0.9	2.31	0.42	2.56	0.62	1.64	0.29	1.42	0.26	35	278	397	21.1	102			39.1		43	0.2
R08	GEOROC	MANYA, S., 2004	-3.08	32.4	IGNEOUS	VOLCANIC	BASALT	2740	40	48.32	1.14	15.07		14.49			0.27	4.95	12.17	2.79	0.17	0.12	0.5	4.2	10.7	1.77	8.3	2.6	1	3.54	0.62	4.06	0.93	2.43	0.42	2.24	0.42	36	330	147	13.4	88			60.5		37	0.3
R09	GEOROC	MANYA, S., 2004	-3.08	32.4	IGNEOUS	VOLCANIC	BASALT	2740	40	48.37	1.12	14.94		15.18			0.31	4.53	12.56	1.65	0.4	0.13	0.8	4.3	10.5	1.73	8.9	2.6	1.03	3.32	0.59	3.86	0.92	2.28	0.41	2.12	0.39	36	305	161	16.5	81			57.7		123	0.2
R10	GEOROC	MANYA, S., 2004	-3.08	32.4	IGNEOUS	VOLCANIC	BASALT	2740	40	47.17	1.31	14.63		15.06			0.26	6.53	11.49	2.34	0.17	0.12	1	4.7	11.8	1.96	9.3	2.8	0.87	3.79	0.66	4.25	1.01	2.63	0.48	2.58	0.46	40	327	184	13.9	78			68.4		52	0.3
R11	GEOROC	MANYA, S., 2004	-3.08	32.4	IGNEOUS	VOLCANIC	BASALT	2740	40	49.4	1.1	14.49		12.95			0.18	6.96	11.1	2.79	0.21	0.12	0.7	4.6	10.7	1.53	7.5	2.2	1.32	2.94	0.51	3.52	0.86	2.25	0.42	2.19	0.37	35	316	232	12.3	84			62.8		44	0.2
R12	GEOROC	MANYA, S., 2004	-3.08	32.4	IGNEOUS	VOLCANIC	BASALT	2740	40	48.32	0.53	15.5		10.85			0.2	8.76	11.59	1.53	0.12	0.09	2.5	2	4.6	0.74	3.8	1.2	0.53	1.84	0.35	2.32	0.56	1.45	0.25	1.37	0.27	35	232	220	22.9	99			30.6		28	0.1
R13	GEOROC	MANYA, S., 2004	-3.08	32.4	IGNEOUS	VOLCANIC	BASALT	2740	40	47.9	0.55	15.76		11.05			0.18	8.86	11.41	1.64	0.1	0.09	2.3	1.8	4.4	0.72	3.6	1.2	0.53	1.9	0.35	2.38	0.56	1.55	0.29	1.4	0.28	37	234	190	26.6	100			30.1		23	0.1
R38	GEOROC	MANYA, S., 2004	-3.08	32.4	IGNEOUS	VOLCANIC	BASALT	2740	40	48.85	0.71	16.1		10.12			0.24	6.54	13.6	2.06	0.17	0.07	1.4	3.1	6.4	1.16	6.4	1.9	0.76	2.44	0.47	2.94	0.68	1.86	0.3	1.6	0.28	33	222	270	23.6	177			40.7		117	0.2
R39	GEOROC	MANYA, S., 2004	-3.08	32.4	IGNEOUS	VOLCANIC	BASALT	2740	40	48.66	0.73	16.61		9.52			0.18	8.36	12.84	2.01	0.07	0.09	0.8	2.8	6.7	0.99	5.6	1.8	0.73	2.57	0.42	2.95	0.67	1.8	0.29	1.62	0.28	34	254	390	12.5	159			43.4		115	0.2
R40	GEOROC	MANYA, S., 2004	-3.08	32.4	IGNEOUS	VOLCANIC	BASALT	2740	40	48.46	1.22	14.36		14.14			0.23	5.92	12.63	1.75	0.51	0.1	0.6	6.1	12.8	2.2	11.7	3.6	1.22	4.55	0.8	5.1	1.11	3.22	0.49	2.73	0.46	36	317	138	14.9	115			79.6		538	0.5
R42	GEOROC	MANYA, S., 2004	-3.08	32.4	IGNEOUS	VOLCANIC	BASALT	2740	40	48.17	0.75	18.19		10.01			0.18	6.02	13.05	2.44	0.43	0.03	0.7	3.6	8.9	1.25	6.9	2.1	0.84	2.64	0.44	2.9	0.67	1.9	0.3	1.63	0.3	35	248	221	17.9	143			42.8		91	0.2
R65	GEOROC	MANYA, S., 2004	-3.08	32.4	IGNEOUS	VOLCANIC	BASALT	2740	40	51.07	0.74	12.49		14.23			0.25	7.45	11.35	1.54	0.18	0.08	0.5	0.9	2.2	0.48	3.2	1.5	0.5	2.16	0.4	2.87	0.66	1.85	0.3	1.75	0.31	37	271	256	19	88			45.2		28	0.1
R67	GEOROC	MANYA, S., 2004	-3.08	32.4	IGNEOUS	VOLCANIC	ANDESITE	2740	40	52.09	0.86	13.55		12.05			0.26	7.42	9.72	3.1	0.27	0.1	0.6	3.6	8.4	1.36	7.9	2.4	1.1	3.11	0.54	3.45	0.75	2.14	0.36	1.97	0.34	39	288	260	13.9	103			58.2		58	0.1
R69	GEOROC	MANYA, S., 2004	-3.08	32.4	IGNEOUS	VOLCANIC	BASALT	2740	40	50.41	0.73	14.2		11.82			0.26	8.76	9.47	2.53	0.23	0.09	1.5	2.3	5.2	0.89	5.1	1.6	0.62	2.21	0.38	2.6	0.58	1.72	0.28	1.56	0.27	40	319	180	26.3	150			41.2		99	0.1
R75	GEOROC	MANYA, S., 2004	-3.08	32.4	IGNEOUS	VOLCANIC	BASALT	2740	40	49.67	0.86	13.77		11.49			0.17	6.46	13.98	1.27	0.08	0.06	2.1	3.5	7.8	1.12	6.7	1.9	0.95	2.4	0.47	3.18	0.63	1.92	0.25	1.73	0.26	39	237	212	41.6	59			45.1		21	0.4
R76	GEOROC	MANYA, S., 2004	-3.08	32.4	IGNEOUS	VOLCANIC	ANDESITE	2740	40	54.33	1.08	14.48		12.08			0.18	3.52	9.66	3.32	0.68	0.08	0.6	7.2	15.2	1.96	9.6	2.6	0.94	2.93	0.54	3.49	0.71	2.18	0.29	2.06	0.29	33	262	96	46.2	55			75.7		191	0.5
R78	GEOROC	MANYA, S., 2004	-3.08	32.4	IGNEOUS	VOLCANIC	BASALT	2740	40	51.4	0.82	13.67		11.51			0.15	8.7	9.9	1.19	0.09	0.09	2.5	2.4	5.8	0.84	5	1.7	0.72	2.33	0.42	2.83	0.58	1.92	0.26	1.78	0.25	45	268	116	50.8	74			40.3		23	0.4
SIN 02	GEOROC	MANYA, S.; MABOKO, M. A. H., 2008	-4.4583	34.8144	IGNEOUS	VOLCANIC	BASALT	2740	0	49.4	1.24	13.7		13.9			0.25	4.67	11.8	2.46	0.25	0.21	1.84	3.8	10.3	1.76	8.33	2.81	1.12	4	0.8	4.8	1	3.1	0.48	3.1	0.46	42	314	190	59	110	120		70		173	0.2	0.2
SIN 04	GEOROC	MANYA, S.; MABOKO, M. A. H., 2008	-4.47	34.8111	IGNEOUS	VOLCANIC	BASALT	2740	0	50	1.74	14		12.6			0.31	4.19	10	3.11	0.19	0.28	3.32	5.1	13.1	2.17	11.6	3.7	1.48	5	0.9	5.5	1.2	3.5	0.53	3.3	0.49	43.7	396	150	53	70	120		86		169	0.2	0.1
SIN 07A	GEOROC	MANYA, S.; MABOKO, M. A. H., 2008	-4.4639	34.7789	IGNEOUS	VOLCANIC	BASALT	2740	0	51.4	1.4	14.3		14.2			0.23	4.89	8.29	3.8	0.23	0.24	0.82	3.6	9.9	1.78	8.73	3.06	1.15	4.3	0.8	5.6	1.2	3.6	0.55	3.5	0.53	41.8	375	150	58	100	130		81		68	0.2	0.1
SIN 07B	GEOROC	MANYA, S.; MABOKO, M. A. H., 2008	-4.4639	34.7789	IGNEOUS	VOLCANIC	BASALT	2740	0	51.3	1.42	14.1		14.4			0.23	4.91	8.54	3.78	0.23	0.24	0.57	4.3	10.3	1.89	10.4	3.4	1.19	4.6	0.9	5.6	1.2	3.5	0.55	3.6	0.55	44.3	390	140	60	90	120		77		73	0.2	0.1
SIN 08	GEOROC	MANYA, S.; MABOKO, M. A. H., 2008	-4.4756	34.7672	IGNEOUS	VOLCANIC	BASALT	2740	0	48	1.17	13.7		17.4			0.22	4.88	9.93	2.83	0.23	0.28	0.99	4.1	11.4	1.88	8.79	2.87	1.19	4	0.7	4.8	1	3.1	0.46	3	0.47	43.8	312	40	62	60	120		72		183	0.2	0.1
SIN 10	GEOROC	MANYA, S.; MABOKO, M. A. H., 2008	-4.3689	34.3278	IGNEOUS	VOLCANIC	BASALT	2740	0	48.5	1.22	13.9		17.2			0.18	6.1	7.91	3.35	0.16	0.23	1.02	3.1	9.1	1.52	8.6	2.8	1.08	3.8	0.7	4.6	1	3	0.46	3	0.45	42.4	331	40	69	60	120		75		90	0.2	0.2
SIN 11	GEOROC	MANYA, S.; MABOKO, M. A. H., 2008	-4.3661	34.3336	IGNEOUS	VOLCANIC	BASALT	2740	0	50.8	1.01	14.4		10.6			0.24	5.64	12.9	0.98	2.07	0.15	0.85	4.7	12	1.78	8.9	2.6	0.99	3.5	0.6	4.1	0.9	2.6	0.39	2.5	0.39	40.7	319	140	57	80	100		65		658	0.2	0.2
SIN 12	GEOROC	MANYA, S.; MABOKO, M. A. H., 2008	-4.3611	34.3169	IGNEOUS	VOLCANIC	BASALT	2740	0	48	0.736	15.4		13.3			0.19	5.82	13.7	1.7	0.14	0.1	0.5	2.9	7.2	1.09	5.7	1.7	0.69	2.3	0.4	2.8	0.6	1.8	0.27	1.8	0.27	35.3	231	290	60	180	90		42		41	0.1	0.2
SIN 13	GEOROC	MANYA, S.; MABOKO, M. A. H., 2008	-4.3617	34.3228	IGNEOUS	VOLCANIC	BASALT	2740	0	47.7	0.796	16.2		12.4			0.21	4.68	13.5	2.81	0.68	0.11	0.54	2.6	7.1	1.08	5.4	1.8	0.7	2.5	0.5	3	0.6	1.9	0.29	1.9	0.28	40	250	310	61	180	90		42		215	0.1	0.1
SIN 15	GEOROC	MANYA, S.; MABOKO, M. A. H., 2008	-4.3533	34.3233	IGNEOUS	VOLCANIC	BASALT	2740	0	50.6	0.96	14.1		10.5			0.24	5.93	12	3.26	0.13	0.17	0.8	2.7	7.9	1.2	6.4	2	0.85	2.9	0.5	3.3	0.7	2.1	0.32	2	0.31	43.4	281	160	61	110	100		46		32	0.1	0.2
SIN 17	GEOROC	MANYA, S.; MABOKO, M. A. H., 2008	-4.3556	34.335	IGNEOUS	VOLCANIC	BASALT	2740	0	49.7	0.7	15.2		11.1			0.19	4.95	14	2.61	0.13	0.09	1	2.9	7.3	1.14	4.97	1.58	0.7	2.3	0.4	2.8	0.6	1.8	0.27	1.8	0.26	37.1	227	280	57	160	90		39		38	0.1	0.1
SIN 18	GEOROC	MANYA, S.; MABOKO, M. A. H., 2008	-4.3556	34.3367	IGNEOUS	VOLCANIC	BASALT	2740	0	47	1.13	15.8		13.2			0.19	5.17	11.3	2.46	0.57	0.26	1.96	4.3	11.8	1.88	10.13	3.18	0.98	3.8	0.7	4.6	1	3	0.46	3	0.46	50.3	319	170	56	70	50		77		147	0.2	0.3
SIN 19	GEOROC	MANYA, S.; MABOKO, M. A. H., 2008	-4.3444	34.33	IGNEOUS	VOLCANIC	ANDESITE	2740	0	52.2	1.03	15.1		10.6			0.15	4.78	10.6	2.73	0.53	0.19	1.56	3.4	9.5	1.47	7.6	2.3	0.81	2.8	0.5	3.1	0.6	2	0.3	2	0.31	40.2	281	170	43	60	50		60		158	0.2	0.2
SIN 20	GEOROC	MANYA, S.; MABOKO, M. A. H., 2008	-4.3439	34.3278	IGNEOUS	VOLCANIC	ANDESITE	2740	0	52.8	1.08	17.7		9.64			0.23	4.79	9.4	3.61	0.24	0.2	1.45	3.7	10.3	1.62	8.7	2.7	0.98	3.5	0.6	4	0.8	2.5	0.39	2.5	0.37	44.9	343	260	62	130	70		62		37	0.2	0.2
SIN 21	GEOROC	MANYA, S.; MABOKO, M. A. H., 2008	-4.3339	34.3161	IGNEOUS	VOLCANIC	BASALT	2740	0	49.2	1.1	16		14.3			0.21	3.94	11.5	1.99	0.47	0.2	0.76	3.4	9.6	1.48	8	2.5	0.96	3.4	0.6	4.1	0.9	2.7	0.4	2.5	0.37	42.6	304	170	56	110	100		64		63	0.2	0.1
SIN 22	GEOROC	MANYA, S.; MABOKO, M. A. H., 2008	-4.3256	34.3144	IGNEOUS	VOLCANIC	BASALT	2740	0	49.5	0.86	15.5		13.5			0.28	4.37	10.7	2.67	0.18	0.15	1.04	2.9	7.9	1.25	7	2.3	0.86	3	0.6	3.6	0.7	2.3	0.34	2.2	0.33	39.6	279	210	58	120	90		52		50	0.2	0.1
SIN 23	GEOROC	MANYA, S.; MABOKO, M. A. H., 2008	-4.3256	34.3156	IGNEOUS	VOLCANIC	BASALT	2740	0	49.8	0.99	15.7		10.8			0.21	5.43	11.1	3.32	0.52	0.21	1.16	3.4	9.7	1.52	8.2	2.5	1.02	3.5	0.6	4.1	0.9	2.7	0.4	2.6	0.39	46.4	300	290	54	120	80		59		145	0.2	0.1
SIN 24	GEOROC	MANYA, S.; MABOKO, M. A. H., 2008	-4.3322	34.3339	IGNEOUS	VOLCANIC	BASALT	2740	0	51.8	1.28	15.1		10.5			0.23	5.48	10	3.32	0.39	0.22	1.26	4.6	13.2	2.01	10.3	3.2	1.11	4.1	0.7	4.7	1	2.9	0.44	2.9	0.44	36.9	326	140	49	80	90		79		132	0.3	2.7
SIN 25	GEOROC	MANYA, S.; MABOKO, M. A. H., 2008	-4.3272	34.35	IGNEOUS	VOLCANIC	BASALT	2740	0	49.5	0.997	14.6		12.6			0.27	4.35	12.5	3.51	0.37	0.18	0.79	3.6	9.7	1.53	8	2.5	0.91	3.4	0.6	4	0.8	2.5	0.38	2.4	0.37	41.4	280	160	50	100	90		58		162	0.2	0.1
SIN 28	GEOROC	MANYA, S.; MABOKO, M. A. H., 2008	-4.3172	34.3344	IGNEOUS	VOLCANIC	BASALT	2740	0	48.6	0.862	15.3		12.7			0.22	7.05	9.59	3.83	0.38	0.13	0.95	3.3	7.4	1.2	6.1	1.9	0.83	2.6	0.5	3.2	0.7	2	0.31	2.1	0.31	40.9	262	300	51	130	100		48		44	0.1	0.1
SIN 29	GEOROC	MANYA, S.; MABOKO, M. A. H., 2008	-4.3	34.3389	IGNEOUS	VOLCANIC	BASALT	2740	0	51.7	0.85	15.5		11.1			0.2	5	9.98	4.31	0.24	0.13	0.59	2.6	7.4	1.12	6	1.9	0.75	2.7	0.5	3.2	0.7	2	0.3	1.9	0.29	38	252	260	55	140	90		46		73	0.1	0.1
87-839	GEOROC	AYER, J. A.; DAVIS, D. W., 1997	49.2	-94.6	IGNEOUS	VOLCANIC	NOT-GIVEN	2730	10	48.6	0.81	15.6		13.8			0.22	6.66	11	1.74	0.13	0.04	0.3	6.26	15.47		11.3	3.26	1.42		0.75	4.68	0.91			2.8	0.41	34	264	103	46	130	99	62	108			0.32	0.1
93-23	GEOROC	AYER, J. A.; DAVIS, D. W., 1997	49.2	-94.6	IGNEOUS	VOLCANIC	NOT-GIVEN	2730	10	49.2	0.73	14.3		13.5			0.21	8.05	11.3	1.71	0.09	0.07	0.95	2.16	4.64		4.93	1.54	0.67		0.4	2.53	0.57			1.84	0.28	45		169	16	45	22	149	46			0.15	0.05
93-26	GEOROC	AYER, J. A.; DAVIS, D. W., 1997	49.2	-94.6	IGNEOUS	VOLCANIC	NOT-GIVEN	2730	10	46.5	0.59	12.2		12			0.2	14	9.49	1.2	0.02	0.06	3.8	2.24	5.41		5.06	1.36	0.53		0.36	2.13	0.45			1.62	0.24	35		959	35	208	50	51	45		66	0.09	0.06
93-27	GEOROC	AYER, J. A.; DAVIS, D. W., 1997	49.2	-94.6	IGNEOUS	VOLCANIC	NOT-GIVEN	2730	10	49.7	0.69	13.8		10.7			0.19	7.78	10.3	3.41	0.33	0.19	3.05	16.62	34.45		18.71	3.53	1.13		0.47	2.17	0.49			1.38	0.23	41		312	20	42	40	62	70		160	0.23	0.19
93-37	GEOROC	AYER, J. A.; DAVIS, D. W., 1997	49.2	-94.6	IGNEOUS	VOLCANIC	NOT-GIVEN	2730	10	46.8	0.67	14.9		12			0.18	7.6	9.83	0.29	0.02	0.07	5.85	2.14	5.47		4.41	1.44	0.64		0.41	2.38	0.53			1.71	0.31	44		359	37	122	70	113	42				0.03
3-M	GEOROC	CROW, C.; CONDIE, K. C., 1988	-25.87	24.73	IGNEOUS	VOLCANIC	NOT-GIVEN	2725	25	48.8	1.23	9.9		16			16.8	7.84	0.35	0.3	0.37	0.13		12	29			3.6	1.18		0.61					1.38	0.22	27		2090	82	880			95			0.27
C4L	GEOROC	CROW, C.; CONDIE, K. C., 1988	-25.87	24.73	IGNEOUS	VOLCANIC	BASALT	2725	25	54.4	0.62	13.9		10.5			6.32	8.24	3.97	0.91	0.16	0.1	1.51	10	22			2.4	0.91		0.5					1.77	0.27	38	192	285	66	179			77		281	0.25	0.7
J17R	GEOROC	CROW, C.; CONDIE, K. C., 1988	-25.87	24.73	IGNEOUS	VOLCANIC	ANDESITE	2725	25	54.4	1.14	13.1		10.2			4.75	6	3.9	1.17	0.13	0.2	5.8	59	127			12	2.95		1.55					3.91	0.57	19	216	165	29	91			345		392	0.76	0.4
J25G	GEOROC	CROW, C.; CONDIE, K. C., 1988	-25.87	24.73	IGNEOUS	VOLCANIC	ANDESITE	2725	25	53.2	1.56	14.4		10.2			4.49	5.82	3.76	1.84	0.11	0.68	3.16	51	116			12	2.84		1.38					3.93	0.62	21	194	267	35	137			292		816	0.68	0.3
J28L	GEOROC	CROW, C.; CONDIE, K. C., 1988	-25.87	24.73	IGNEOUS	VOLCANIC	BASALT	2725	25	53.4	0.73	13.6		10.5			7.17	9.42	2.47	0.99	0.15	0.16	1.94	6.6	15			2	0.62		0.4					1.41	0.23	33	194	406	57	214			71		229	0.19	0.4
J35O	GEOROC	CROW, C.; CONDIE, K. C., 1988	-25.87	24.73	IGNEOUS	VOLCANIC	BASALT	2725	25	54.8	0.94	14.4		11.1			4.98	7.19	3.55	1.47	0.14	0.13	1.62	13	28			3.4	1.08		0.52					1.67	0.25	26	203	59	50	151			110		394	0.39	0.8
S10J	GEOROC	CROW, C.; CONDIE, K. C., 1988	-25.87	24.73	IGNEOUS	VOLCANIC	BASALT	2725	25	55	0.96	14.9		11			4.99	7.42	3.55	1.27	0.15	0.12	1.52	11	24			3.1	0.93		0.5					1.51	0.23	22	218	12	46	120			110		368	0.33	0.8
S1O	GEOROC	CROW, C.; CONDIE, K. C., 1988	-25.87	24.73	IGNEOUS	VOLCANIC	BASALT	2725	25	53.7	1.03	14.6		11.6			5.18	7.94	3.74	0.56	0.16	0.12	1.47	11	24			3.1	0.96		0.51					1.41	0.22	21	212	51	48	139			109		1265	0.35	0.8
S20L	GEOROC	CROW, C.; CONDIE, K. C., 1988	-25.87	24.73	IGNEOUS	VOLCANIC	BASALT	2725	25	51.2	0.43	10.3		10.2			13.56	7.63	2.83	0.18	0.2	0.05	2.81	6.9	15			1.9	0.64		0.35					1.2	0.19	26	185	295	48	217			72		197	0.15	0.4
S21E	GEOROC	CROW, C.; CONDIE, K. C., 1988	-25.87	24.73	IGNEOUS	VOLCANIC	BASALT	2725	25	52.9	0.63	13.3		10.3			8.2	8.67	3.73	0.86	0.2	0.07	1.88	6.9	15			2	0.67		0.38					1.43	0.21	32	196	413	55	244			69		275	0.15	0.4
S34E	GEOROC	CROW, C.; CONDIE, K. C., 1988	-25.87	24.73	IGNEOUS	VOLCANIC	BASALT	2725	25	51.9	0.44	10.5		10.1			13.36	7.95	1.99	0.41	0.16	0.05	3.42	4.8	11			1.3	0.44		0.27					0.95	0.13	25	166	1319	55	405			50		145	0.1	0.3
GSWA100513	GEOROC	NELSON, D. R.; TRENDALL, A. F.; DE LAETER, J. R.; GROBLER, N. J.; FLETCHER, I. R., 1992	-21.14	119.6	IGNEOUS	VOLCANIC	BASALT	2725	35	52.6	0.91	14.3	1.84		7.22		0.12	2.88	6.75	4.22	0.98	0.15		23.5	44.9		19.77	4.15	1.34	4.52		4.06	0.92	2.47		2.06	0.32	21	192	72	60	135	105	67	172				2
GSWA42198	GEOROC	NELSON, D. R.; TRENDALL, A. F.; DE LAETER, J. R.; GROBLER, N. J.; FLETCHER, I. R., 1992	-21.45	120.2	IGNEOUS	VOLCANIC	BASALT	2725	35	53.5	1.3	14.5	2.73		7.89		0.2	5.68	6.24	5.24	0.24	0.23		12.9	27.9		14.63	3.44	1.25	4.08		3.96	0.92	2.63		2.42	0.38	29	241	138	39	71	110	76	150
ROQ-1B	GEOROC	DOSTAL, J.; MUELLER, W. U., 2013	48.2	-80	IGNEOUS	VOLCANIC	BASALT	2723	1	50.89	0.76	13.66		12.07			0.18	7.32	8.74	3.46	0.06	0.06	3.1	2.01	5.51	0.81	4.37	1.51	0.57	2.17	0.43	2.88	0.57	1.63	0.23	1.75	0.28		254	209	44	71			43.6		49
WP-7	GEOROC	DOSTAL, J.; MUELLER, W. U., 2013	48.2	-80	IGNEOUS	VOLCANIC	BASALT	2723	1	52.01	1.36	14.71		9.92			0.25	4.71	8.57	3.67	0.34	0.22	3.97	10.16	23.73	3.15	13.76	3.45	1.17	3.72	0.56	3.58	0.75	2.4	0.32	2.16	0.33		202	116	35	31			119		255
A811	GEOROC	BASU, A. R.; GOODWIN, A. M.; TATSUMOTO, M., 1984	48.17	-79.75	IGNEOUS	VOLCANIC	MUGEARITE	2720	0	54.8	1.15	19.57				8.18	0.19	4.11	3.59	5.92	2.53						75.993	13.629
A903	GEOROC	BASU, A. R.; GOODWIN, A. M.; TATSUMOTO, M., 1984	48.17	-79.75	IGNEOUS	VOLCANIC	TRACHYBASALT	2720	0	52.1	0.85	15.28				8.6	0.14	7	8.82	3.55	3.65						47.173	9.187
A905	GEOROC	BASU, A. R.; GOODWIN, A. M.; TATSUMOTO, M., 1984	48.17	-79.75	IGNEOUS	VOLCANIC	HAWAIITE	2720	0	54.9	0.98	17.09				8.02	0.25	5.22	5.22	6.29	2.02						175.25	31.843
A907	GEOROC	BASU, A. R.; GOODWIN, A. M.; TATSUMOTO, M., 1984	48.17	-79.75	IGNEOUS	VOLCANIC	BASALT	2720	0	48.48	0.73	16.88				7.38	0.21	5.01	11.18	4.56	5.58						81.935	14.655
ROQ-1	GEOROC	DOSTAL, J.; MUELLER, W. U., 2013	48.2	-80	IGNEOUS	VOLCANIC	BASALT	2720	0	52.94	1.11	12.52		11.69			0.17	7.68	7.12	4.52	0.02	0.08	2.7	4.16	10.75	1.78	9	2.82	0.91	3.82	0.53	3.61	0.67	1.89	0.25	1.39	0.18		269	144	39	120			61.2		24
ROQ-3	GEOROC	DOSTAL, J.; MUELLER, W. U., 2013	48.2	-80	IGNEOUS	VOLCANIC	BASALT	2720	0	50.19	0.76	14.52		12.26			0.18	8.23	7.21	4.05	0.04	0.06	3.1	2.69	7.32	1.13	5.78	1.97	0.75	2.6	0.46	3.21	0.7	1.98	0.33	2.06	0.32		249	396	47	97			57.1		49
ROQ-8	GEOROC	DOSTAL, J.; MUELLER, W. U., 2013	48.2	-80	IGNEOUS	VOLCANIC	BASALT	2720	0	49.87	0.73	13.48		11.88			0.17	8.14	10.67	2.8	0.03	0.05	2.3	2.87	7.81	1.22	5.9	2.08	0.74	2.85	0.48	3.29	0.75	2.19	0.32	2.22	0.33		245	408	43	95			57.2		32
ROQ-8B	GEOROC	DOSTAL, J.; MUELLER, W. U., 2013	48.2	-80	IGNEOUS	VOLCANIC	BASALT	2720	0	49.85	0.74	13.77		11.8			0.17	7.83	10.77	2.87	0.03	0.06	2.2	2.09	5.43	0.85	4.41	1.45	0.52	2.13	0.39	2.59	0.54	1.64	0.25	1.64	0.24		247	406	46	92			44.1		27
WM-4	GEOROC	DOSTAL, J.; MUELLER, W. U., 2013	48.2	-80	IGNEOUS	VOLCANIC	BASALT	2720	0	49.54	0.67	12.63		11.92			0.17	11.66	7.59	3.48	0.03	0.05	2.84	2.75	6.68	1.02	5.11	1.52	0.55	2.09	0.37	2.36	0.5	1.51	0.23	1.43	0.21		197	1122	75	335			44.5		13
WP-11	GEOROC	DOSTAL, J.; MUELLER, W. U., 2013	48.2	-80	IGNEOUS	VOLCANIC	BASALT	2720	0	54.23	1.28	15.2		10.32			0.25	5.15	3.94	4.99	0.13	0.2	3.94	8.22	20.14	2.75	12.29	3.07	1.05	3.41	0.52	3.3	0.67	2.1	0.28	1.79	0.27		189	138	41	47			108		141
WP-12	GEOROC	DOSTAL, J.; MUELLER, W. U., 2013	48.2	-80	IGNEOUS	VOLCANIC	BASALT	2720	0	54.97	1.37	16.31		8.37			0.15	3.48	4.81	7.44	0.08	0.23	3.03	9.36	22.42	3.03	13.58	3.42	1.06	3.9	0.6	3.85	0.79	2.47	0.33	2.12	0.33		205	149	44	63			120		92
96TB0006	GEOROC	BARRIE, C. T.; CORFU, F.; DAVIS, P.; COUTTS, A. C.; MACEACHERN, D., 1999	48.2	-80.1	IGNEOUS	VOLCANIC	BASALT	2715	5	47.9	0.62	10.8		11.2			0.18	13	9.42	2.4	0.03	0.06	3.3	2.3	5.5	0.92	4.7	1.5	0.53	2.2	0.42	2.8	0.57	1.6	0.26	1.7	0.27	31	210	1400	63	450	96	89	44	12	70		0.08
96TB0015	GEOROC	BARRIE, C. T.; CORFU, F.; DAVIS, P.; COUTTS, A. C.; MACEACHERN, D., 1999	48.2	-80.1	IGNEOUS	VOLCANIC	BASALT	2715	5	49.2	0.98	9		13.9			0.22	11.5	11.5	0.9	0.01	0.08	2.8	4	11	1.7	9	2.6	1	3.4	0.54	3	0.66	1.7	0.27	1.6	0.26	29	230	1200	58	380	95	210	63	13	62	0.2	0.11
96TB0016	GEOROC	BARRIE, C. T.; CORFU, F.; DAVIS, P.; COUTTS, A. C.; MACEACHERN, D., 1999	48.2	-80.1	IGNEOUS	VOLCANIC	BASALT	2715	5	53.4	1.04	9.9		12.7			0.21	8.39	9.6	2.1	0.03	0.09	3.2	4.4	11	1.9	10	2.9	0.87	3.7	0.59	3.3	0.71	1.8	0.29	1.8	0.29	25	230	230	41	130	88	120	70	13	75	0.2	0.14
96TB0023	GEOROC	BARRIE, C. T.; CORFU, F.; DAVIS, P.; COUTTS, A. C.; MACEACHERN, D., 1999	48.2	-80.1	IGNEOUS	VOLCANIC	BASALT	2715	5	49.9	0.84	8		13.3			0.22	13.28	10.16	0.9	0.04	0.08	3.2	4.5	11	1.8	9.2	2.5	0.86	3.2	0.53	3	0.64	1.7	0.25	1.7	0.28	27	210	1300	62	480	57	120	68	12	53	0.3	0.17
96TB0044	GEOROC	BARRIE, C. T.; CORFU, F.; DAVIS, P.; COUTTS, A. C.; MACEACHERN, D., 1999	48.2	-80.1	IGNEOUS	VOLCANIC	BASALT	2715	5	50.2	1.5	17.9		9.5			0.13	3.03	9.55	5	0.15	0.14	3.1	5.5	14	2.2	11	3.2	1.1	4	0.72	4.7	0.97	3	0.44	3.1	0.48	42	320	370	56	200	31	83	110	21	99		0.21
96TB0046	GEOROC	BARRIE, C. T.; CORFU, F.; DAVIS, P.; COUTTS, A. C.; MACEACHERN, D., 1999	48.2	-80.1	IGNEOUS	VOLCANIC	BASALT	2715	5	49.5	1.32	17.4		8.1			0.15	3.66	13.2	3.6	0.09	0.13	2.8	5.7	13	2.1	10	2.7	1	3.4	0.64	3.9	0.83	2.4	0.37	2.6	0.37	35	290	250	46	160	31	34	79	22	77		0.11
96TB0057	GEOROC	BARRIE, C. T.; CORFU, F.; DAVIS, P.; COUTTS, A. C.; MACEACHERN, D., 1999	48.2	-80.1	IGNEOUS	VOLCANIC	BASALT	2715	5	53.2	0.32	18.6		6.7			0.16	5.71	8.29	1.8	0.11	0.04	3.5	1.1	3.2	0.51	2.9	0.77	0.29	1.2	0.25	1.8	0.43	1.5	0.25	1.8	0.28	42	200	510	220	6800	240	48	22	9.3	92	0.2	0.06
96TB0060	GEOROC	BARRIE, C. T.; CORFU, F.; DAVIS, P.; COUTTS, A. C.; MACEACHERN, D., 1999	48.2	-80.1	IGNEOUS	VOLCANIC	BASALT	2715	5	47.8	0.3	17		11			0.32	9.29	6.08	1.9	0.08	0.03	6	1.1	2.9	0.44	2.5	0.71	0.24	1.1	0.23	1.7	0.42	1.3	0.23	1.8	0.28	41	170	540	86	660	54	44	18	10	120		0.05
E054	GEOROC	BARLEY, M. E.; BROWN, S. J. A.; KRAPEZ, B.; KOSITCIN, N., 2008	-29.2887	122.278	IGNEOUS	VOLCANIC	ANDESITE	2710	10	51.71	0.83	14.61	9.23				0.14	7.58	8.22	1.63	1.28	0.16	4.44	11.87	25.05	3.12	13.82	2.88	0.921	3	0.49	2.72	0.57	1.66		1.6	0.23	21	160	287		233	71		101		314	0.3	0.5
E112	GEOROC	BARLEY, M. E.; BROWN, S. J. A.; KRAPEZ, B.; KOSITCIN, N., 2008	-29.0972	121.487	IGNEOUS	VOLCANIC	BASALT	2710	10	48.93	1.44	15.42	14.33				0.28	4.63	8.06	3.81	0.35	0.18	2.42	7.77	18.38	2.55	12.97	3.54	1.124	4.31	0.79	4.58	0.99	3.22		3.26	0.51	32	243	133		53	94		99		198	0.4	0.47
E143	GEOROC	BARLEY, M. E.; BROWN, S. J. A.; KRAPEZ, B.; KOSITCIN, N., 2008	-29.14	121.373	IGNEOUS	VOLCANIC	ANDESITE	2710	10	47.77	0.89	16.57	10.05				0.13	7.91	9.88	3.18	0.29	0.02	3.16	9.12	27.12	3.78	17.1	3.49	1.213	3.43	0.53	3.08	0.62	1.94		1.96	0.28	31	209	113		194	55		43		62	0.1
E260	GEOROC	BARLEY, M. E.; BROWN, S. J. A.; KRAPEZ, B.; KOSITCIN, N., 2008	-28.7259	122.478	IGNEOUS	VOLCANIC	ANDESITE	2710	10	52.85	0.6	14.15	7.81				0.14	6.12	8.37	3.83	0.29	0.15	5.55	11.72	25	3.01	12.98	2.84	0.754	2.7	0.43	2.46	0.48	1.51		1.49	0.22	28	151	542		341	78		87		78	0.3	0.48
40869	GEOROC	COUSENS, B. L., 2000	62.6557	-114.298	IGNEOUS	VOLCANIC	BASALT	2710	10	48.71	0.84	15.1		12.31			0.21	7.33	10.08	1.65	0.21	0.06	2.74	3.17	7.95	1.19	7.45	2.4	0.85	2.71	0.49	3.36	0.73	2.2	0.31	2.04	0.27	29	250	201	50	145			59		52	0.14	0.11
GS-4	GEOROC	COUSENS, B. L., 2000	62.4992	-114.343	IGNEOUS	VOLCANIC	BASALT	2710	10	52.2	1.46	17.65		9.79			0.2	3.85	2.14	5.91	1.21	0.16	3.18	9.5	21.01	2.67	9.98	2.23	1.05	3.3	0.59	3.97	0.83	2.44	0.38	2.27	0.33	27	240	140	40	73	130	88	110		630		0.58
YK-28	GEOROC	COUSENS, B. L., 2000	62.523	-114.366	IGNEOUS	VOLCANIC	BASALT	2710	10	47	2.18	13.87		15.27			0.21	5.94	9.03	2.41	0.86	0.29	2.63	12.29	30.14	4.41	20.8	6.24	2.24	8.41	1.39	8.98	1.94	5.57	0.83	5.23	0.81	29	369	153	36	88	109	123	183		150	0.62	0.57
YK-7	GEOROC	COUSENS, B. L., 2000	62.45	-114.372	IGNEOUS	VOLCANIC	BASALT	2710	10	49.72	1.15	14.41		15.04			0.24	5.67	8.42	3.65	0.06	0.09	0.72	2.76	8.38	1.37	6.58	2.26	0.83	3.41	0.63	4.3	0.96	2.75	0.41	2.5	0.37	36	323	188	51	89	115	142	77		70	0.22	0.12
86-6A	GEOROC	FOWLER, A. P. G.; JENSEN, L. S., 1989	48.5	-79.03	IGNEOUS	VOLCANIC	BASALT	2710	0	52.45	1.05	16.44	2.22		6.55		0.13	6.74	8.56	2.25	0.47	0.04		10	21.8		11.1	2.7	0.88		0.51	3.4	0.7	1.7		1.9	0.31			172					96			0.93
F-377	GEOROC	FOWLER, A. P. G.; JENSEN, L. S., 1989	48.4	-81.3	IGNEOUS	VOLCANIC	ANDESITE	2710	0	54.2	2.31	12.48	5.51		9.52		0.19	4.34	5.84	4.95	0.66	0.33		7.7	23		20	6.5	2.05		1.69	9.9	2.1	6		6.4	1.08								146			2.03
F-462	GEOROC	FOWLER, A. P. G.; JENSEN, L. S., 1989	48.4	-81.3	IGNEOUS	VOLCANIC	BASALT	2710	0	50.88	2.54	12.04	5.16		11.59		0.24	4.62	7.14	3.73	0.8	0.23		6	15.4		13.4	4.3	1.7		1.21	6.3	1.36	4.3		4.3	0.7			6					103			14.74
F-637	GEOROC	FOWLER, A. P. G.; JENSEN, L. S., 1989	48.4	-81.3	IGNEOUS	VOLCANIC	BASALT	2710	0	50.36	0.95	13.99	3.23		8.2		0.19	8.13	11.48	1.39	0.19	0.04		1.69	4.5		5.1	1.44	0.59		0.4	2.6	0.59	1.7		1.81	0.32			255					33			1.32
98H006	GEOROC	SANDEMAN, H. A.; HANMER, S.; TELLA, S.; ARMITAGE, A. A.; DAVIS, W. J.; RYAN, J. J., 2006	62	-92	IGNEOUS	VOLCANIC	BASALT	2710	40	47.7	0.53	20.1				7.29	0.16	6.55	13.63	1.9	0.57	0.05	1	2.8	6.6	0.98	20.65	6.14	0.68	2	0.37	2.3	0.49	1.4	0.22	1.5	0.23	35	190	520	65	280	73	65	38	17	120		0.07
98H058	GEOROC	SANDEMAN, H. A.; HANMER, S.; TELLA, S.; ARMITAGE, A. A.; DAVIS, W. J.; RYAN, J. J., 2006	62	-92	IGNEOUS	VOLCANIC	BASALT	2710	40	48.51	0.45	18.01				7.38	0.19	6.83	15.14	1.81	0.28	0.05	0.6	2.52	5.8	0.81	3.6	1.1	0.56	1.81	0.32	2.11	0.46	1.4	0.21	1.4	0.22	29	160	540	53	290	56	47	30	15	44		0.07
98H175A	GEOROC	SANDEMAN, H. A.; HANMER, S.; TELLA, S.; ARMITAGE, A. A.; DAVIS, W. J.; RYAN, J. J., 2006	62	-92	IGNEOUS	VOLCANIC	BASALT	2710	40	50.9	0.71	13.3				11.16	0.21	7.8	10.55	2.5	0.78	0.06	1.1	4.62	11	1.51	6.49	1.89	0.67	2.7	0.51	3.41	0.78	2.3	0.37	0.24	0.39	50	272	266	45	92	87	51	49	14	130	0.34	0.17
98H196	GEOROC	SANDEMAN, H. A.; HANMER, S.; TELLA, S.; ARMITAGE, A. A.; DAVIS, W. J.; RYAN, J. J., 2006	62	-92	IGNEOUS	VOLCANIC	ANDESITE	2710	40	54.1	0.56	21.6				5.58	0.19	2.6	9.91	3.5	0.6	0.02	1.1	2.7	7.11	1.02	23.08	6.92	0.55	1.7	0.28	1.8	0.32	0.98	0.14	0.96	0.15	29	180	440	55	200	65	52	35	15	140		0.1
98H329	GEOROC	SANDEMAN, H. A.; HANMER, S.; TELLA, S.; ARMITAGE, A. A.; DAVIS, W. J.; RYAN, J. J., 2006	62	-92	IGNEOUS	VOLCANIC	BASALT	2710	40	49.9	0.53	13.1				10.53	0.2	8.76	13.35	1.5	0.35	0.04	1.5	2.3	5.2	0.78	3.7	1.3	0.48	1.9	0.38	2.7	0.63	1.8	0.27	1.9	0.29	50	250	320	50	110	57	61	34	13	31	0.15	0.09
98H360	GEOROC	SANDEMAN, H. A.; HANMER, S.; TELLA, S.; ARMITAGE, A. A.; DAVIS, W. J.; RYAN, J. J., 2006	62	-92	IGNEOUS	VOLCANIC	BASALT	2710	40	49.7	0.53	15.2				10.53	0.16	7.98	10.39	3.1	0.91	0.05	0.4	9.1	22	2.8	11	2.4	0.78	2.2	0.33	1.9	0.38	1	0.15	0.99	0.16	25	174	141	49	167	87	102	29	16	110	0.12	0.11
98J099A	GEOROC	SANDEMAN, H. A.; HANMER, S.; TELLA, S.; ARMITAGE, A. A.; DAVIS, W. J.; RYAN, J. J., 2006	62	-92	IGNEOUS	VOLCANIC	BASALT	2710	40	51.4	0.82	13.8				11.7	0.25	7.3	11.23	1.8	0.24	0.07	0.6	2.91	7.19	1.1	26.81	9.07	0.75	2.69	0.51	3.1	0.75	2.09	0.35	2.3	0.33	43	280	82	70	73	82	85	48	16	120		0.09
98M126	GEOROC	SANDEMAN, H. A.; HANMER, S.; TELLA, S.; ARMITAGE, A. A.; DAVIS, W. J.; RYAN, J. J., 2006	62	-92	IGNEOUS	VOLCANIC	BASALT	2710	40	49.3	1.15	13.8				14.67	0.23	6.63	10.56	2	0.25	0.09	0.5	3.3	8.91	1.41	34.31	11.56	0.93	3.61	0.71	4	0.93	2.59	0.44	2.9	0.45	45	330	180	69	70	95	92	60	17	43		0.08
98J131B	GEOROC	SANDEMAN, H. A.; HANMER, S.; TELLA, S.; ARMITAGE, A. A.; DAVIS, W. J.; RYAN, J. J., 2006	62	-92	IGNEOUS	VOLCANIC	BASALT	2708.5	36.5	48	0.63	15.3				10.62	0.19	8.1	13.51	1	0.16	0.05	2	1.8	4.8	0.77	21.2	7.3	0.6	2	0.38	2.5	0.56	1.7	0.25	1.8	0.25	40	240	400	59	180	66	68	33	14	20		0.04
22179	GEOROC	SPROULE, R. A.; LESHER, C. M.; AYER, J. A.; THURSTON, P. C.; HERZBERG, C. T., 2002	49	-79.37	IGNEOUS	VOLCANIC	BASALT	2706.5	3.5	54.3	0.65	13.27				9.43	0.16	12.17	6.45	3.32	0.01	0.09	2.87	4.44	10.4	1.63	7.29	2.05	0.66	3.02	0.58	3.8	0.86	2.44	0.37	2.31	0.41	36.3	220	884	54.6	193	69	103	58.9				0.14
MP-68	GEOROC	BARLEY, M. E.; KERRICH, R.; REUDAVY, I.; XIE, QIANLI, 2000	-28.3333	121.017	IGNEOUS	VOLCANIC	BASALT	2705	15	49.22	0.54	11.02		12.28			0.23	14.47	9.63	2.49	0.08	0.04	2.47	1.27	3.3	0.59	3.02	1.13	0.47	1.61	0.28	2.02	0.42	1.28	0.2	1.22	0.18	46.28	248	1362	83	281			29.72			0.07
MP-8A	GEOROC	BARLEY, M. E.; KERRICH, R.; REUDAVY, I.; XIE, QIANLI, 2000	-28.3333	121.017	IGNEOUS	VOLCANIC	BASALT	2705	15	50.58	0.62	11.38		12.65			0.2	12.04	10.1	2.3	0.08	0.04	1.83	2.21	5.71	0.94	4.94	1.64	0.58	2.33	0.4	2.87	0.59	1.75	0.26	1.56	0.23	46.21	260	731	49	217			37.79			0.11
2	GEOROC	DIMROTH, E.; IMREH, L.; GOULET, N.; ROCHELEAU, M., 1983	47.5	-78	IGNEOUS	VOLCANIC	NOT-GIVEN	2705	5	50.55	0.6	18.6	2.85		4.55			5.65	10.8	0.8	0.9	0.05
3	GEOROC	DIMROTH, E.; IMREH, L.; GOULET, N.; ROCHELEAU, M., 1983	47.5	-78	IGNEOUS	VOLCANIC	NOT-GIVEN	2705	5	51.2	0.6	16.95	3.7		5.85			6.55	8.5	1.55	0.35	0.05
4	GEOROC	DIMROTH, E.; IMREH, L.; GOULET, N.; ROCHELEAU, M., 1983	47.5	-78	IGNEOUS	VOLCANIC	NOT-GIVEN	2705	5	50	0.45	16.05	3		6.25			7	9.55	0.4	0.94	0.05
5	GEOROC	DIMROTH, E.; IMREH, L.; GOULET, N.; ROCHELEAU, M., 1983	47.5	-78	IGNEOUS	VOLCANIC	NOT-GIVEN	2705	5	53.78	0.95	9.84	3.82		12.01			8.9	1.75	0.15		0.15
6	GEOROC	DIMROTH, E.; IMREH, L.; GOULET, N.; ROCHELEAU, M., 1983	47.5	-78	IGNEOUS	VOLCANIC	NOT-GIVEN	2705	5	52.12	1.2	16.62	2.7		10.41			3.51	6.1	2.89	0.68	0.23
1A	GEOROC	DIMROTH, E.; IMREH, L.; GOULET, N.; ROCHELEAU, M., 1983	47.5	-78	IGNEOUS	VOLCANIC	NOT-GIVEN	2705	5	50.53	0.79	8.5		14.6				8.32	10.97	0.23	0.18	0.51
7A	GEOROC	DIMROTH, E.; IMREH, L.; GOULET, N.; ROCHELEAU, M., 1983	47.5	-78	IGNEOUS	VOLCANIC	NOT-GIVEN	2705	5	48.61	0.85	15.06		13.65				8.34	8.85	1.01	0.39	0.26
7B	GEOROC	DIMROTH, E.; IMREH, L.; GOULET, N.; ROCHELEAU, M., 1983	47.5	-78	IGNEOUS	VOLCANIC	NOT-GIVEN	2705	5	45.59	0.91	16.14		14.93				8.83	8.47	0.8	0.37	0.33
8A	GEOROC	DIMROTH, E.; IMREH, L.; GOULET, N.; ROCHELEAU, M., 1983	47.5	-78	IGNEOUS	VOLCANIC	NOT-GIVEN	2705	5	50.06	0.84	14.89		13.66				7.83	7.09	1.18	0.28	0.28
8B	GEOROC	DIMROTH, E.; IMREH, L.; GOULET, N.; ROCHELEAU, M., 1983	47.5	-78	IGNEOUS	VOLCANIC	NOT-GIVEN	2705	5	48.19	0.8	14.92		12.68				7.66	10.52	0.91	0.32	0.4
9A	GEOROC	DIMROTH, E.; IMREH, L.; GOULET, N.; ROCHELEAU, M., 1983	47.5	-78	IGNEOUS	VOLCANIC	NOT-GIVEN	2705	5	54.09	0.84	13.53		12.48				7.25	7.04	1.57	0.23	0.27
9B	GEOROC	DIMROTH, E.; IMREH, L.; GOULET, N.; ROCHELEAU, M., 1983	47.5	-78	IGNEOUS	VOLCANIC	NOT-GIVEN	2705	5	48.22	0.82	15.22		13.47				7.41	10.06	0.74	0.64	0.39
6411	GEOROC	SPROULE, R. A.; LESHER, C. M.; AYER, J. A.; THURSTON, P. C.; HERZBERG, C. T., 2002	48.2	-80.1	IGNEOUS	VOLCANIC	BASALT	2705	5	51.5	0.64	10.18				12.36	0.18	15.78	7.08	1.97	0.01	0.05	3.58	1.3	4.48	0.72	4.18	1.58	0.54	2.13	0.36	2.16	0.5	1.5	0.22	1.33	0.17	37.9	233	1480	72.6	333	73.7	32.2	29.4				0.04
22180	GEOROC	SPROULE, R. A.; LESHER, C. M.; AYER, J. A.; THURSTON, P. C.; HERZBERG, C. T., 2002	49	-79.37	IGNEOUS	VOLCANIC	BASALT	2705	5	53	0.53	10.69				9.35	0.17	15.96	7.94	2.01	0.01	0.06	3.17	3.58	8.91	1.38	6.07	1.85	0.52	2.49	0.5	3.09	0.72	2.04	0.31	1.98	0.32	28.4	177	1490	69.2	484	72.3	69.2	49				0.12
23214	GEOROC	SPROULE, R. A.; LESHER, C. M.; AYER, J. A.; THURSTON, P. C.; HERZBERG, C. T., 2002	48.0705	-80.0862	IGNEOUS	VOLCANIC	BASALT	2705	5	52.08	0.62	11.94				10.94	0.18	12.95	8.42	2.61	0.01		2.69	3.03	7.1	1.1	5.22	1.7	0.63	2.23	0.41	2.6	0.59	1.77	0.27	1.79	0.26	37.9	227	1390	73	357	72	68.9	41.6				0.07
27581	GEOROC	SPROULE, R. A.; LESHER, C. M.; AYER, J. A.; THURSTON, P. C.; HERZBERG, C. T., 2002	48.318	-81.0737	IGNEOUS	VOLCANIC	BASALT	2705	5	54.06	0.3	9.89				6.84	0.19	15.86	10.33	0.61	1.6	0.05	2.28	3.21	7.4	1.02	4.61	1.21	0.42	1.47	0.22	1.63	0.33	0.98	0.11	1.03	0.15		124	1670	47.1	262	67.6	5.12	25.8				0.1
8714	GEOROC	LA FLECHE, M. R.; DUPUY, C., 1992	48.25	-79.02	IGNEOUS	VOLCANIC	ANDESITE	2700.5	2.5	53.9	0.87	17.42		7.39			0.16	4.6	11.8	3.34	0.45	0.07		3.4	9		7.6	2.29	0.87		0.51					1.6	0.26	41	261	435	56	230			53			0.17
CH22	GEOROC	ARNDT, N. T., 1986	48.6	-80.5	IGNEOUS	VOLCANIC	NOT-GIVEN	2700	0	47.9	0.2	7.7				10.9		23.9	8.6	0.26	0.1
CH28	GEOROC	ARNDT, N. T., 1986	48.6	-80.5	IGNEOUS	VOLCANIC	NOT-GIVEN	2700	0	50	0.82	8.1				13		12.5	13.6	1.6	0.1
CH3	GEOROC	ARNDT, N. T., 1986	48.6	-80.5	IGNEOUS	VOLCANIC	NOT-GIVEN	2700	0	50.5	0.9	9.7				13.2		11.6	11.6	2	0.25
C592	GEOROC	ARNDT, N. T.; JENNER, G. A., 1986	-31.2	121.67	IGNEOUS	VOLCANIC	BASALT	2700	0	54.17	0.93	14.06				12.06	0.19	5.53	9.57	2.64	0.75	0.1		14	28.04		13.47	3.18	0.95	3.43		3.84		2.39		2.28		42	275	32		48			97		296
KA1	GEOROC	ARNDT, N. T.; JENNER, G. A., 1986	-31.2	121.67	IGNEOUS	VOLCANIC	BASALT	2700	0	50.58	0.81	15.64				11.33	0.18	5.96	11.24	3.62	0.6			2.56	7.28		6.24	2.09	0.79	2.84		3.45		2.23		2.15	0.31	47	293	375		177			51
P9-195	GEOROC	ARNDT, N. T.; NALDRETT, A. J.; PYKE, D. R., 1977	48.6	-80.5	IGNEOUS	VOLCANIC	BASALT	2700	0	48.6	1.51	12	2.8		12		0.21	4.67	9.4	4.6	0.05		4.3																	209	346	99
C126	GEOROC	ARNDT, N. T.; NESBITT, R. W., 1984	48.2	-80.1	IGNEOUS	VOLCANIC	BASALT	2700	0	51.02	0.61	12.2		11.6			0.19	12.2	8.5	3.39	0.09	0.07	2.55	1.7	4.88		4.17	1.53	0.55	2.35		2.78		1.79		1.73	0.26	38	237	1089		285			38		102
D0146-1	GEOROC	CLOUTIER, J.; STEVENSON, R. K.; BARDOUX, M., 2005	-3.8	32.6	IGNEOUS	VOLCANIC	BASALT	2700	100	49.47	1.24	13.11		14.57			0.216	6.53	10.04	2.24	0.17	0.12	1.41	4.12	10.6	1.62	12.9	3.91	0.98	3.4	0.64	4.08	0.88	2.68	0.42	2.53	0.39	41	313	52	41	42			66		75	0.22	0.27
D0149-13	GEOROC	CLOUTIER, J.; STEVENSON, R. K.; BARDOUX, M., 2005	-3.8	32.6	IGNEOUS	VOLCANIC	ANDESITE	2700	100	53.19	0.461	14.1		23.46			0.2	2.99	5.83	0.24	0.19	0.11		16.2	34.2	4.06	19.9	3.68	0.87	2.67	0.4	2.31	0.47	1.43	0.22	1.36	0.21	14	76	71	9				92		26	0.53	1.88
D0185-1	GEOROC	CLOUTIER, J.; STEVENSON, R. K.; BARDOUX, M., 2005	-3.8	32.6	IGNEOUS	VOLCANIC	BASALT	2700	100	52.55	2.206	12.67		14.73			0.287	4.71	6.42	4.5	0.63	0.17	0.66	5.05	13.8	2.18	13.6	4.75	1.29	6.14	1.19	7.47	1.58	4.79	0.78	4.65	0.7	52	454		17				143		131	0.41	0.56
D0309-1	GEOROC	CLOUTIER, J.; STEVENSON, R. K.; BARDOUX, M., 2005	-3.8	32.6	IGNEOUS	VOLCANIC	BASALT	2700	100	49.29	2.64	11.5		20.15			0.282	4.73	8.59	2.11	0.5	0.2	0.2	8.48	21.7	3.24	18.6	5.44	1.74	6.26	1.14	7.24	1.51	4.55	0.7	4.41	0.67	47	443	20	43	31			132		96	0.47	0.6
D0309-2	GEOROC	CLOUTIER, J.; STEVENSON, R. K.; BARDOUX, M., 2005	-3.8	32.6	IGNEOUS	VOLCANIC	BASALT	2700	100	51.83	1.452	15.16		13.66			0.161	3.32	7.11	3.78	0.43	0.24	2.83	11.7	27	3.88	22.5	6.03	1.83	6.45	1.17	7.15	1.5	4.49	0.7	4.28	0.64	30	224		33				141		103	0.45	1.09
D0309-3	GEOROC	CLOUTIER, J.; STEVENSON, R. K.; BARDOUX, M., 2005	-3.8	32.6	IGNEOUS	VOLCANIC	BASALT	2700	100	49.82	1.432	13.55		14.4			0.242	6.41	10.53	2.25	0.18	0.11	0.96	3.98	10.2	1.56	9.3	2.83	1	3.33	0.64	4.01	0.84	2.57	0.4	2.44	0.37	45	357	58	42	49			64		54	0.21	0.25
JW-10	GEOROC	DOSTAL, J.; MUELLER, W. U., 1992	49.87	-74.35	IGNEOUS	VOLCANIC	ABSAROKITE	2700	0	50.62	0.99	15.69		9.67			0.13	6.56	5.57	3.55	3.58	0.42	1.8	42.7	97.1	11.8	45.4	7.62	1.57	6.27	0.68	3.94	0.74	2.13	0.29	1.91	0.27	21	173	322		91			145		686	0.55	1.51
JW-11	GEOROC	DOSTAL, J.; MUELLER, W. U., 1992	49.87	-74.35	IGNEOUS	VOLCANIC	SHOSHONITE	2700	0	53.67	1.17	18.25		9.11			0.12	2.81	5	4.62	2.8	0.55	0.9	52.1	119	14.5	55.8	8.91	1.97	7.05	0.81	4.46	0.88	2.47	0.34	2.1	0.27	16	142	91		27			131		611	0.74	1.94
JW-14	GEOROC	DOSTAL, J.; MUELLER, W. U., 1992	49.87	-74.35	IGNEOUS	VOLCANIC	ANDESITE	2700	0	51.27	0.84	13.25		8.7			0.12	7.36	6.55	3.97	0.67	0.25	7	22.6	55.2	6.97	28.2	5.41	1.5	4.82	0.58	3.11	0.59	1.59	0.21	1.32	0.19	23	154	821		190			147		367	0.49	1.08
JW-15	GEOROC	DOSTAL, J.; MUELLER, W. U., 1992	49.87	-74.35	IGNEOUS	VOLCANIC	ANDESITE	2700	0	51.74	0.8	12.91		8.12			0.14	6.43	7.23	3.08	0.8	0.26	8.8	25.7	60.5	7.52	29.6	5.35	1.35	4.57	0.43	2.09	0.4	1.04	0.14	1.12	0.15	19	127	931		186			148		223	0.04	1.04
JW-16	GEOROC	DOSTAL, J.; MUELLER, W. U., 1992	49.87	-74.35	IGNEOUS	VOLCANIC	ANDESITE	2700	0	54.95	0.72	14.95		8.13			0.13	5.32	4.53	4.82	0.64	0.34	5.3	36.1	82	9.96	38.8	6.58	1.6	5.2	0.55	2.75	0.49	1.38	0.19	1.27	0.19	15	120	241		65			163		189	0.53	1.45
JW-18	GEOROC	DOSTAL, J.; MUELLER, W. U., 1992	49.87	-74.35	IGNEOUS	VOLCANIC	BASALT	2700	0	53.86	0.5	12.96		6.13			0.13	6.42	7.19	4.4	0.5	0.46	6.8	40	90.4	11.2	44.6	8.11	2.01	6.56	0.63	3.22	0.55	1.51	0.21	1.35	0.18	17	118	448		64			164		535	0.29	1.54
JW-19	GEOROC	DOSTAL, J.; MUELLER, W. U., 1992	49.87	-74.35	IGNEOUS	VOLCANIC	BASALT	2700	0	49.72	0.57	11.82		10.38			0.2	11.13	9.71	2.18	1.23	0.24	2.4	20	44	5.44	21.9	4.27	1.15	3.85	0.43	2.42	0.46	1.33	0.19	1.18	0.18	27	185	1091		257			73		522	0.24	0.71
JW-2	GEOROC	DOSTAL, J.; MUELLER, W. U., 1992	49.87	-74.35	IGNEOUS	VOLCANIC	NOT-GIVEN	2700	0	52.87	1.07	19.94		7.81			0.1	3.22	5.97	4.1	3.1	0.53	1.2	51	116	14.1	52.8	8.63	1.9	7.86	0.78	4.51	0.88	2.45	0.36	2.31	0.32	17	132	46		17			179		687	0.85	2.64
JW-21	GEOROC	DOSTAL, J.; MUELLER, W. U., 1992	49.87	-74.35	IGNEOUS	VOLCANIC	BASALT	2700	0	50.66	0.69	12.94		9.99			0.19	8.15	9.07	3.32	1.52	0.24	1.7	16.3	36.8	4.64	19.1	4.15	1.1	4.33	0.48	2.74	0.55	1.63	0.23	1.52	0.22	27	213	476		76			64		728	0.24	0.55
JW-22	GEOROC	DOSTAL, J.; MUELLER, W. U., 1992	49.87	-74.35	IGNEOUS	VOLCANIC	BASALT	2700	0	50.74	0.5	19.51		8.11			0.14	4.31	4.16	5.03	1.68	0.24	6	17.5	41.5	5.45	22	3.73	1.04	2.77	0.29	1.61	0.29	0.76	0.12	0.77	0.1	11	79	21		24			76		527	0.02	0.42
JW-3	GEOROC	DOSTAL, J.; MUELLER, W. U., 1992	49.87	-74.35	IGNEOUS	VOLCANIC	NOT-GIVEN	2700	0	50.63	0.93	16.89		9.27			0.14	5.76	8.4	2.97	2.27	0.4	0.9	37.6	86.2	10.7	42	7.02	1.59	5.89	0.65	3.68	0.72	2.03	0.29	1.8	0.25	24	174	170		50			112		586	0.53	1.51
JW-4	GEOROC	DOSTAL, J.; MUELLER, W. U., 1992	49.87	-74.35	IGNEOUS	VOLCANIC	NOT-GIVEN	2700	0	54.74	1.09	16.61		8.77			0.12	3.61	4.9	3.32	3.18	0.5	1.7	52	116	14.1	54.2	8.51	1.95	7.6	0.78	4.29	0.87	2.43	0.35	2.22	0.33	18	137	100		31			187		745	0.68	1.92
JW-5	GEOROC	DOSTAL, J.; MUELLER, W. U., 1992	49.87	-74.35	IGNEOUS	VOLCANIC	ABSAROKITE	2700	0	49	0.68	11.75		10.32			0.17	11.79	7.83	2.48	2.27	0.25	1.9	8.48	21.2	2.6	11.1	2.43	0.69	2.68	0.33	2.07	0.41	1.15	0.17	1.05	0.14	23	153	1325		288			25		464	0.14	0.31
JW-6	GEOROC	DOSTAL, J.; MUELLER, W. U., 1992	49.87	-74.35	IGNEOUS	VOLCANIC	ABSAROKITE	2700	0	48.61	0.73	13		9.78			0.17	9.48	8.11	2.93	2.46	0.28	2.9	12.3	28.3	3.66	15.2	3.19	0.98	3.8	0.44	2.67	0.53	1.53	0.23	1.37	0.2	28	192	963		218			31		660	0.19	0.43
JW-7	GEOROC	DOSTAL, J.; MUELLER, W. U., 1992	49.87	-74.35	IGNEOUS	VOLCANIC	ABSAROKITE	2700	0	49.96	0.7	12.28		9.76			0.17	10.5	7.85	2.62	2.61	0.27	1.9	11	25.9	3.41	14.1	3.02	0.83	3.32	0.41	2.54	0.5	1.48	0.21	1.33	0.2	25	165	1090		239			38		607	0.21	0.42
JW-8	GEOROC	DOSTAL, J.; MUELLER, W. U., 1992	49.87	-74.35	IGNEOUS	VOLCANIC	ABSAROKITE	2700	0	53.19	1.07	16.95		9.11			0.12	2.98	6.61	3.77	2.73	0.49	2.1	53.2	118	14.4	54.4	9	2.05	7.83	0.83	4.53	0.88	2.47	0.35	2.07	0.28	16	129	66		25			116		814	0.69	1.91
JW-9	GEOROC	DOSTAL, J.; MUELLER, W. U., 1992	49.87	-74.35	IGNEOUS	VOLCANIC	ABSAROKITE	2700	0	50.22	0.74	13.05		9.58			0.17	10.16	6.98	2.23	2.7	0.29	2.3	13.2	30.1	3.86	16	3.38	0.93	3.44	0.43	2.61	0.51	1.51	0.22	1.46	0.2	25	179	1022		222			46		614	0.2	0.48
B1	GEOROC	FAN, J.; KERRICH, R., 1997	48.47	-81.4	IGNEOUS	VOLCANIC	BASALT	2700	0	54.3	0.987	15.4		9.76			0.216	5.2	8.8	3.28	0.852	0.097	8.4	3.44	9.21	1.39	7.35	2.44	0.929	3.3	0.625	4.38	0.943	2.78	0.427	2.7	0.404	44.6	321	74.1	35	74.1			54.1		202		0.054
B5	GEOROC	FAN, J.; KERRICH, R., 1997	48.47	-81.4	IGNEOUS	VOLCANIC	BASALT	2700	0	51.1	0.569	8.68		12.8			0.232	17.2	8.72	1.53	0.021	0.042	4.1	0.96	3.02	0.493	2.96	1.12	0.403	1.63	0.297	1.99	0.441	1.3	0.185	1.17	0.171	31	226	2273	74	614			26.2		7.2		0.021
B6	GEOROC	FAN, J.; KERRICH, R., 1997	48.47	-81.4	IGNEOUS	VOLCANIC	BASALT	2700	0	52.2	0.558	9.38		11.1			0.224	13	11.4	2.83	0.032	0.043	5.5	1.2	3.45	0.538	3.25	1.21	0.538	1.79	0.333	2.13	0.455	1.31	0.194	1.29	0.179	36.4	203	2995	83	848			27.2		17.8		0.021
B7	GEOROC	FAN, J.; KERRICH, R., 1997	48.47	-81.4	IGNEOUS	VOLCANIC	BASALT	2700	0	53.6	0.646	16.3		13.7			0.304	5.97	7.92	2.5	0.042	0.063	3.45	2.2	5.94	0.858	4.25	1.4	0.464	1.92	0.413	3.33	0.842	2.78	0.501	3.39	0.555	58	307	32.1	38	112			43.1		18.3		0.072
T10	GEOROC	FAN, J.; KERRICH, R., 1997	48.47	-81.4	IGNEOUS	VOLCANIC	BASALT	2700	0	52.3	0.564	9.36		10.6			0.222	13.7	9.99	2.87	0.021	0.053	4.15	1.02	3.32	0.552	3	1.21	0.491	1.75	0.324	2.25	0.481	1.35	0.198	1.23	0.176	37.8	226	3247	96	881			28.1		35.6		0.021
T12	GEOROC	FAN, J.; KERRICH, R., 1997	48.47	-81.4	IGNEOUS	VOLCANIC	BASALT	2700	0	49.4	0.577	16		12.1			0.432	6.57	12.3	2.02	0.054	0.065	6.59	1.77	5.26	0.776	4.18	1.5	0.506	2.28	0.464	3.87	0.974	3.39	0.605	4.39	0.694	47.2	227	193	46	172			40		12.4		0.054
T7	GEOROC	FAN, J.; KERRICH, R., 1997	48.47	-81.4	IGNEOUS	VOLCANIC	THOLEIITE	2700	0	49.9	0.527	8.58		11.9			0.288	16.1	10.5	1.62	0.011	0.053	4.77	1.09	3.31	0.542	3.09	1.16	0.514	1.64	0.304	2.07	0.457	1.19	0.192	1.15	0.174	32.9	220	2952	92	942			26		11.2		0.021
DUNBCH-10	GEOROC	GANGOPADHYAY, A.; SPROULE, R. A.; WALKER, R. J.; LESHER, C. M., 2005	48.2	-80.1	IGNEOUS	VOLCANIC	BASALT	2700	0	47.9	0.56	12		12.6			0.21	12.2	13.7	0.01	0.74	0.04	2.72																	708		178
DUNBCH-13	GEOROC	GANGOPADHYAY, A.; SPROULE, R. A.; WALKER, R. J.; LESHER, C. M., 2005	48.2	-80.1	IGNEOUS	VOLCANIC	BASALT	2700	0	49.2	0.44	10.2		12			0.22	14.7	11.6	0.73	0.74	0.03	2.38																	1139		223
DUNBCH-14	GEOROC	GANGOPADHYAY, A.; SPROULE, R. A.; WALKER, R. J.; LESHER, C. M., 2005	48.2	-80.1	IGNEOUS	VOLCANIC	BASALT	2700	0	48.7	0.56	13.7		11.9			0.21	9.2	13.5	0.15	1.93	0.04	2.66																	327		115
DUNBCH-15	GEOROC	GANGOPADHYAY, A.; SPROULE, R. A.; WALKER, R. J.; LESHER, C. M., 2005	48.2	-80.1	IGNEOUS	VOLCANIC	BASALT	2700	0	49.2	0.56	13.3		11.1			0.2	12	11.3	0.38	1.89	0.03	3.09																	400		119
DUNBCH-7	GEOROC	GANGOPADHYAY, A.; SPROULE, R. A.; WALKER, R. J.; LESHER, C. M., 2005	48.2	-80.1	IGNEOUS	VOLCANIC	BASALT	2700	0	50.3	0.55	11.7		11.6			0.22	12.6	11.2	0.97	0.75	0.04	2.26																	1022		118
DUNBCH-8	GEOROC	GANGOPADHYAY, A.; SPROULE, R. A.; WALKER, R. J.; LESHER, C. M., 2005	48.2	-80.1	IGNEOUS	VOLCANIC	BASALT	2700	0	50.5	0.64	14.6		12.3			0.18	8.4	10.2	2.06	1.06	0.05	1.92																	303		70
DUNBCH-9	GEOROC	GANGOPADHYAY, A.; SPROULE, R. A.; WALKER, R. J.; LESHER, C. M., 2005	48.2	-80.1	IGNEOUS	VOLCANIC	BASALT	2700	0	47.8	0.56	12.7		12.9			0.22	12.5	11.6	0.36	1.1	0.04	2.98																	888		199
92	GEOROC	GRUAU, G.; JAHN, B.-M.; GLIKSON, A. Y.; DAVY, R.; HICKMAN, A. H.; CHAUVEL, C., 1987	-21.18	119.73	IGNEOUS	VOLCANIC	BASALT	2700	0	50.91	0.7	7.49		10.83			0.22	12.19	14.79	1.45	0.08	0.04		2.9	7.58		5.68	1.825	0.632	2.409		2.737		1.681		1.52	0.226		216	1710	46	176			43		117
SJV91-1A	GEOROC	HOLLINGS, P.; KERRICH, R., 2000	51	-91	IGNEOUS	VOLCANIC	BASALT	2700	0	48.02	2.97	13.4		18.07			0.34	3.84	7.97	3.34	0.39	1.66		27.05	69.81	10.03	48.23	12.56	4.5	14.03	1.95	11.39	2.24	5.74	0.78	4.59	0.66	31	40	4	39	2		27	68		137	0.93	0.14
SJV91-1D	GEOROC	HOLLINGS, P.; KERRICH, R., 2000	51	-91	IGNEOUS	VOLCANIC	BASALT	2700	0	51.06	2.02	14		17.91			0.28	3.09	7.2	3.27	0.31	0.86	0.91	23.42	58.6	8.09	37.85	9.24	3.72	10.41	1.51	9.14	1.86	5.11	0.71	4.36	0.67	30	38	18	49	14		16	128		106	1.01	0.35
SJV91-1M	GEOROC	HOLLINGS, P.; KERRICH, R., 2000	51	-91	IGNEOUS	VOLCANIC	BASALT	2700	0	51.99	0.64	15.84		12.59			0.17	7.27	8.11	2.8	0.51	0.07	0.6	8.07	18.47	2.62	11.91	3.17	1.49	3.62	0.58	3.6	0.77	2.15	0.32	2.01	0.32	33	215	46	75	146		44	50		271	0.31	0.23
SJV91-2H	GEOROC	HOLLINGS, P.; KERRICH, R., 2000	51	-91	IGNEOUS	VOLCANIC	BASALT	2700	0	50.2	0.61	18.98		12.24			0.33	3.17	9.06	3.08	2.24	0.08	0.45	10.31	20.7	2.43	9.84	2.16	0.69	2.3	0.39	2.4	0.5	1.46	0.22	1.44	0.22	24	136	217	44	121		5	70		323	0.26	0.5
SJV91-4Q	GEOROC	HOLLINGS, P.; KERRICH, R., 2000	51	-91	IGNEOUS	VOLCANIC	BASALT	2700	0	50.34	1.92	17.47		14			0.03	15.62	0.3	0.09	0.02	0.21	7.82	17.44	39.97	5.05	21.26	4.97	1.56	4.88	0.71	4.26	0.83	2.24	0.32	2.02	0.29	19	152	36	51	63		5	146		2	0.43	0.19
SJV91-4R	GEOROC	HOLLINGS, P.; KERRICH, R., 2000	51	-91	IGNEOUS	VOLCANIC	BASALT	2700	0	51.63	1.9	17.35		15.09			0.28	10.99	1.41	1.03	0.06	0.24	6.28	19.8	46.36	5.88	24.89	5.32	1.72	5.63	0.81	4.82	0.96	2.58	0.36	2.34	0.35	21	182	50	68	70		7	143		12	0.68	0.39
SJV94-1A	GEOROC	HOLLINGS, P.; KERRICH, R., 2000	51	-91	IGNEOUS	VOLCANIC	BASALT	2700	0	52.12	2.24	13.21		16.73			0.25	4.56	6.09	4.21	0.39	0.2	0.25	20.1	46.73	6.06	26.7	6.29	2.09	6.75	1.06	6.63	1.41	4.07	0.61	3.9	0.57	26	233	1	67	1		14	177		163	0.72	0.65
SJV94-1V	GEOROC	HOLLINGS, P.; KERRICH, R., 2000	51	-91	IGNEOUS	VOLCANIC	BASALT	2700	0	51.65	2.11	12.76		17.72			0.23	4.04	8.14	2.82	0.31	0.22	0.15	16.84	40.69	5.45	24.58	6.42	1.8	7.67	1.27	8.2	1.8	5.26	0.79	5.01	0.74	43	566	6	75	20		78	122		50	0.72	0.5
SL87-03	GEOROC	HOLLINGS, P.; KERRICH, R., 2000	51	-91	IGNEOUS	VOLCANIC	BASALT	2700	0	45.02	0.74	15.73		14.59			0.23	9.71	11.51	1.03	1.39	0.05	14.54	2.01	5.93	0.9	4.88	0.92		2.32	0.38	2.34	0.47	1.28	0.17	1.06	0.16	45	236	379	79	228		134	35		88	0.07	0.05
SL87-04	GEOROC	HOLLINGS, P.; KERRICH, R., 2000	51	-91	IGNEOUS	VOLCANIC	BASALT	2700	0	50.73	2.26	12.74		19.63			0.28	3.1	7.29	3.16	0.46	0.35	6.49	14.72	34.27	5.31	25.38	2.32		9.7	1.51	9.84	2.24	6.86	0.94	5.63	0.92	33	112	3	46	2		51	197		134	0.69	0.43
SL87-05	GEOROC	HOLLINGS, P.; KERRICH, R., 2000	51	-91	IGNEOUS	VOLCANIC	BASALT	2700	0	49.95	0.57	18.02		10.54			0.27	8.57	8.09	3.9	0.05	0.04	3.74	4.66	9.82	1.4	6.17	1.65	0.74	1.79	0.28	1.86	0.37	0.95	0.16	0.9	0.13	42	262	496	78	273		129	47		59	0.22	0.36
SL87-05	GEOROC	HOLLINGS, P.; KERRICH, R., 2000	51	-91	IGNEOUS	VOLCANIC	BASALT	2700	0	48.04	0.93	15.03		13.76			0.24	5.75	13.54	2.38	0.29	0.05	4.5	4.24	11.19	1.64	8.02	0.96		3.31	0.59	3.88	0.86	2.46	0.37	2.3	0.33	47	309	395	81	191		146	54		85	0.18	0.1
SL88-06	GEOROC	HOLLINGS, P.; KERRICH, R., 2000	51	-91	IGNEOUS	VOLCANIC	BASALT	2700	0	50.38	1.31	16.97		16.54			0.2	7.51	3.68	2.18	1.13	0.09	6.39	4.64	11.21	1.78	9.13	1.11		3.4	0.52	3.58	0.78	2.13	0.32	1.89	0.32	37	287	247	80	214		126	63		185	0.2	0.13
SL88-09	GEOROC	HOLLINGS, P.; KERRICH, R., 2000	51	-91	IGNEOUS	VOLCANIC	BASALT	2700	0	49.82	0.6	16.61		13.22			0.28	7.71	10.33	1.38		0.05	8.11	5.33	12.02	1.48	6.21	1.7	0.64	2.01	0.32	2.02	0.43	1.17	0.17	1.1	0.16	30	187	392	70	221		131	43		12	0.19	0.26
SL88-15	GEOROC	HOLLINGS, P.; KERRICH, R., 2000	51	-91	IGNEOUS	VOLCANIC	BASALT	2700	0	49.65	0.94	14.71		10.93			0.19	5.35	14.06	4.06	0.03	0.06	6	5.11	12.92	1.81	9.1	0.84		3.19	0.46	2.84	0.64	1.67	0.23	1.47	0.23	34	230	112	62	116		164	59		30	0.27	0.11
SL95-1	GEOROC	HOLLINGS, P.; KERRICH, R., 2000	51	-91	IGNEOUS	VOLCANIC	BASALT	2700	0	50.18	1.24	14.25		14.35			0.22	6.52	10.59	2.18	0.35	0.11	0.55	4.65	12.75	1.83	8.56	2.8	0.99	3.94	0.66	4.57	1.07	3.1	0.45	3	0.45	53	398	215	64	88		159	82		66	0.29	0.1
SL95-18	GEOROC	HOLLINGS, P.; KERRICH, R., 2000	51	-91	IGNEOUS	VOLCANIC	BASALT	2700	0	47.03	0.69	17.14		12.02			0.18	8.35	12.96	1.48	0.1	0.05	2.41	4.49	11.16	1.56	7.2	1.86	0.88	2.32	0.34	2.11	0.42	1.19	0.17	1.12	0.16	26	191	205	73	204		136	44		28	0.25	0.12
SL95-20	GEOROC	HOLLINGS, P.; KERRICH, R., 2000	51	-91	IGNEOUS	VOLCANIC	BASALT	2700	0	46.58	1.43	17.76		14.21			0.17	6.97	9.7	2.84	0.21	0.14	3.09	11.5	27.44	3.43	13.93	3.34	1.22	3.63	0.61	3.92	0.85	2.31	0.34	2.06	0.3	39	267	337	60	235		62	85		74	0.38	0.31
SL95-21	GEOROC	HOLLINGS, P.; KERRICH, R., 2000	51	-91	IGNEOUS	VOLCANIC	BASALT	2700	0	47.99	0.82	15.48		13.5			0.2	8.26	11.43	1.97	0.3	0.06	2.46	2.81	7.46	1.1	6.08	2.1	0.7	2.88	0.44	2.9	0.61	1.66	0.26	1.62	0.26	33	224	282	65	177		115	51		56	0.15	0.11
SL95-22	GEOROC	HOLLINGS, P.; KERRICH, R., 2000	51	-91	IGNEOUS	VOLCANIC	BASALT	2700	0	51.65	2.07	12.02		18.71			0.24	3.87	8.37	2.34	0.45	0.27	4.33	12.66	32.71	4.54	21.6	2.11		8.05	1.35	8.65	1.92	5.61	0.83	5.22	0.79	33	281	24	45	30		126	168		83	0.65	0.41
SL95-23	GEOROC	HOLLINGS, P.; KERRICH, R., 2000	51	-91	IGNEOUS	VOLCANIC	BASALT	2700	0	47.67	0.92	15.44		15.23			0.25	8.95	8.22	2.64	0.63	0.06	2.88	4.33	11.29	1.6	7.95	0.82		2.83	0.45	2.76	0.54	1.49	0.24	1.36	0.21	35	241	268	74	211		46	55		83	0.26	0.1
SL95-26	GEOROC	HOLLINGS, P.; KERRICH, R., 2000	51	-91	IGNEOUS	VOLCANIC	BASALT	2700	0	48.35	0.89	16.43		12.48			0.19	7.67	10.61	2.2	1.11	0.07	2.3	6.12	15.11	2.08	9.24	2.53	0.86	3.3	0.55	3.61	0.8	2.05	0.32	1.85	0.3	35	243	242	61	191		86	71		134	0.3	0.3
SL95-27	GEOROC	HOLLINGS, P.; KERRICH, R., 2000	51	-91	IGNEOUS	VOLCANIC	BASALT	2700	0	47.52	0.61	16.02		11.48			0.18	10.28	10.85	1.26	1.76	0.03	3.79	1.91	5.05	0.72	3.54	1.17	0.51	1.63	0.25	1.64	0.35	0.99	0.15	0.83	0.11	29	188	389	61	248		101	30		252	0.1	0.05
SL95-34	GEOROC	HOLLINGS, P.; KERRICH, R., 2000	51	-91	IGNEOUS	VOLCANIC	BASALT	2700	0	52.84	0.79	17.25		10.73			0.18	6.18	9.07	2.83	0.06	0.05	7.41	2.14	5.67	0.82	4.93	1.6	0.66	2.7	0.49	3.57	0.83	2.34	0.38	2.13	0.33	71	393	459	70	163		154	48		24	0.09	0.08
SL95-35	GEOROC	HOLLINGS, P.; KERRICH, R., 2000	51	-91	IGNEOUS	VOLCANIC	BASALT	2700	0	51.33	0.73	15.64		11.97			0.38	6.18	10.89	1.26	1.57	0.05	6.78	2.2	5.59	0.81	4.17	1.63	0.57	2.35	0.45	3.11	0.66	1.96	0.31	2.05	0.31	52	318	348	59	131		45	47		88	0.09	0.06
SL95-4	GEOROC	HOLLINGS, P.; KERRICH, R., 2000	51	-91	IGNEOUS	VOLCANIC	BASALT	2700	0	48.66	0.59	16.29		11.53			0.15	9.6	11.85	1.17	0.12	0.04	3.95	3.46	8.43	1.11	5.15	1.55	0.61	2.19	0.36	2.29	0.5	1.28	0.19	1.18	0.16	44	204	398	67	171		154	43		16	0.21	0.08
SL95-43	GEOROC	HOLLINGS, P.; KERRICH, R., 2000	51	-91	IGNEOUS	VOLCANIC	BASALT	2700	0	51.98	0.45	17.75		9.82			0.29	4.41	10.02	5.2	0.05	0.03	5.54	3.34	7.98	0.99	4.38	1.26	0.4	1.45	0.24	1.49	0.33	0.86	0.13	0.76	0.12	32	146	371	43	91		95	34		45	0.18	0.36
SL95-4M	GEOROC	HOLLINGS, P.; KERRICH, R., 2000	51	-91	IGNEOUS	VOLCANIC	BASALT	2700	0	52.32	1.76	13.57		17.47			0.22	4.08	7.61	2.21	0.56	0.22	2.56	12.62	31.58	4.41	20.32	1.9		7.21	1.22	8.31	1.79	5.2	0.77	4.94	0.72	30	269	12	49	27		12	156		80	0.54	0.42
SL95-4N	GEOROC	HOLLINGS, P.; KERRICH, R., 2000	51	-91	IGNEOUS	VOLCANIC	BASALT	2700	0	49.68	1.88	12.19		19.62			0.26	5.31	8.01	2.52	0.37	0.15	2.51	11.02	26.89	3.67	17.62	1.56		6.2	1.04	7.04	1.51	4.53	0.69	4.27	0.62	33	461	42	63	71		129	129		42	0.45	0.34
SL95-5	GEOROC	HOLLINGS, P.; KERRICH, R., 2000	51	-91	IGNEOUS	VOLCANIC	BASALT	2700	0	49.83	0.94	14.64		14.02			0.21	7.55	10.49	1.78	0.46	0.09	2.72	5.84	13.69	1.83	7.97	2.14	0.86	3.27	0.49	3.14	0.66	1.79	0.26	1.56	0.27	35	263	190	72	93		217	61		131	0.31	0.16
SL95-6	GEOROC	HOLLINGS, P.; KERRICH, R., 2000	51	-91	IGNEOUS	VOLCANIC	BASALT	2700	0	52.34	0.8	16.69		11.13			0.22	5.15	9.12	4	0.53	0.04	1.42	2.59	6.84	0.95	5.31	1.82	0.81	3.01	0.46	3.23	0.71	2.08	0.32	2.02	0.34	40	259	348	54	176		77	39		134	0.14	0.09
LSJ95-10	GEOROC	HOLLINGS, P.; KERRICH, R., 2006	51.0844	-90.2807	IGNEOUS	VOLCANIC	BASALT	2700	0	50.92	1.01	15.33	13.91				0.18	6.11	9.64	2.69	0.15	0.06	0.3	3.33	9.61	1.43	7.68	2.55	1	3.29	0.56	3.49	0.76	2.22	0.33	2.06	0.31	45	256	203	54	116			55		39	0.14	0.11
LSJ95-11	GEOROC	HOLLINGS, P.; KERRICH, R., 2006	51.0857	-90.2727	IGNEOUS	VOLCANIC	BASALT	2700	0	48.13	0.87	14.76	14.25				0.2	10.16	9.34	2.12	0.13	0.05	0.4	1.98	5.94	0.97	5.55	1.86	0.71	2.5	0.45	2.67	0.61	1.71	0.24	1.64	0.24	40	223	257	66	269			43		77	0.1	0.1
LSJ95-12	GEOROC	HOLLINGS, P.; KERRICH, R., 2006	51.0855	-90.3062	IGNEOUS	VOLCANIC	BASALT	2700	0	49.8	0.94	14.98	13.66				0.23	7.22	11.64	1.32	0.14	0.07	0.55	3.01	8.32	1.09	6.41	2.53	0.89	3.21	0.57	3.66	0.82	2.36	0.36	2.27	0.36	59	59	152	56	123			58			0.18	0.14
LSJ95-5	GEOROC	HOLLINGS, P.; KERRICH, R., 2006	51.1385	-90.2717	IGNEOUS	VOLCANIC	BASALT	2700	0	50.43	1.22	15.53	13.62				0.2	5.38	10.19	3.1	0.24	0.1	0.4	4.05	12.86	2	10.55	3.07	1.17	3.52	0.55	3.41	0.7	2.02	0.28	1.74	0.25	37	218	202	29	64			66		125	0.15	0.28
LSJ95-6A	GEOROC	HOLLINGS, P.; KERRICH, R., 2006	51.0831	-90.3273	IGNEOUS	VOLCANIC	BASALT	2700	0	51.75	1.16	16.24	13.62				0.18	4.54	10.29	1.89	0.24	0.1	0.45	6.23	16.17	2.2	10.6	3.02	1.06	3.27	0.53	3.28	0.7	1.93	0.28	1.78	0.26	34	226	130	54	165			73		128	0.21	0.21
LSJ95-7	GEOROC	HOLLINGS, P.; KERRICH, R., 2006	51.0804	-90.3447	IGNEOUS	VOLCANIC	BASALT	2700	0	51.26	1.33	14.44	14.44				0.18	6.26	9.25	2.58	0.17	0.08	0.55	2.08	6.44	1.1	7.3	2.91	1.1	3.53	0.55	3.4	0.7	1.85	0.28	1.61	0.23	39	210	310	39	72			75		38	0.16	0.29
LSJ95-8	GEOROC	HOLLINGS, P.; KERRICH, R., 2006	51.0763	-90.313	IGNEOUS	VOLCANIC	BASALT	2700	0	47.82	1.14	17.07	13.88				0.19	5.56	11.42	2.7	0.14	0.07	0.85	6.82	16.88	2.19	10.85	3.01	0.98	3.49	0.53	3.44	0.69	2.13	0.3	1.9	0.28	46	266	236	56	143			74		48	0.18	0.24
LSJ95-9A	GEOROC	HOLLINGS, P.; KERRICH, R., 2006	51.0837	-90.2808	IGNEOUS	VOLCANIC	SHOSHONITE	2700	0	48.85	0.84	13	11.22				0.2	10.09	12.89	2.17	0.5	0.24	2.9	42.06	92.36	10.54	44.26	8.4	2.03	6.05	0.66	3.48	0.65	1.74	0.24	1.52	0.26	42	251	281	55	219			96		264	0.23	1.71
LSJ95-9B	GEOROC	HOLLINGS, P.; KERRICH, R., 2006	51.0837	-90.2808	IGNEOUS	VOLCANIC	BASALT	2700	0	49.49	1.18	14.97	14.26				0.16	6.46	10.39	2.9	0.14	0.05	0.4	2.95	8.97	1.37	7.77	2.67	0.83	3.18	0.51	2.94	0.62	1.62	0.25	1.4	0.21	40	283	182	64	249			49		92	0.11	0.11
PK95-1	GEOROC	HOLLINGS, P.; KERRICH, R., 2006	50.9828	-90.3659	IGNEOUS	VOLCANIC	BASALT	2700	0	50.32	0.87	14.22	14.42				0.22	9.88	7	2.92	0.08	0.06	0.4	4.38	11.25	1.53	7.78	2.43	0.77	3.16	0.56	3.59	0.82	2.36	0.35	2.37	0.33	57	339	128	59	87			60		25	0.18	0.07
PK95-12	GEOROC	HOLLINGS, P.; KERRICH, R., 2006	51.0165	-90.2163	IGNEOUS	VOLCANIC	BASALT	2700	0	49.35	1.57	15.03	14.93				0.29	5.05	10.87	2.71	0.07	0.13	0.45	5.92	17.69	2.4	12.92	4.3	1.38	5.17	0.92	5.99	1.34	3.75	0.56	3.52	0.53	58	417	197	49	73			101		23	0.38	0.12
PK95-2B	GEOROC	HOLLINGS, P.; KERRICH, R., 2006	50.9922	-90.3368	IGNEOUS	VOLCANIC	BASALT	2700	0	53.43	1.23	15.5	13.79				0.18	5.89	5.68	3.8	0.39	0.12	0.2	3.53	9.86	1.4	6.96	2.52	0.96	3.56	0.66	4.57	1.03	2.99	0.46	2.87	0.45	57	8	270	43	79			82		594	0.19	0.08
PK95-3	GEOROC	HOLLINGS, P.; KERRICH, R., 2006	51.0071	-90.3145	IGNEOUS	VOLCANIC	BASALT	2700	0	48.63	1.21	15.77	13.19				0.19	4.33	13.29	2.91	0.4	0.09	2.35	5.86	13.1	1.7	8.21	2.56	1.08	3.5	0.63	4.18	0.92	2.69	0.4	2.62	0.4	56	350	108	54	92			84		135	0.3	0.16
PK95-4	GEOROC	HOLLINGS, P.; KERRICH, R., 2006	50.9863	-90.3137	IGNEOUS	VOLCANIC	BASALT	2700	0	48.99	0.54	14.84	11.38				0.17	9.8	13.01	1.19	0.04	0.04	0.4	1.69	4.68	0.64	3.63	1.28	0.48	1.68	0.29	2	0.43	1.22	0.18	1.19	0.16	51	249	304	70	384			29		24	0.09	0.09
PK95-6	GEOROC	HOLLINGS, P.; KERRICH, R., 2006	50.9342	-90.2957	IGNEOUS	VOLCANIC	BASALT	2700	0	51.05	0.59	15.12	10.46				0.18	7.71	12.01	2.73	0.1	0.04	1.55	1.44	4.06	0.61	3.44	1.24	0.51	1.99	0.33	2.52	0.54	1.64	0.25	1.71	0.22	59	269	136	49	130			38		18	0.08	0.02
PL95-42	GEOROC	HOLLINGS, P.; KERRICH, R., 2006	51.025	-90.3582	IGNEOUS	VOLCANIC	BASALT	2700	0	52.26	1.57	14.89	12.86				0.24	3.49	11.75	2.41	0.38	0.14	0.3	8.57	20.8	2.77	13.48	3.73	1.35	4.56	0.7	4.59	0.94	2.7	0.39	2.65	0.35	48	330	122	57	76			91		156	0.41	0.18
5077	GEOROC	JAHN, B.-M.; GRUAU, G.; GLIKSON, A. Y., 1982	-25.77	31	IGNEOUS	VOLCANIC	BASALT	2700	0	52.72	0.64	7.37		12.15			0.17	11.34	10.56	2.97	0.05	0.08		3.78	10.47		7.465	2.122	0.712	2.732		2.843		1.71		1.652	0.263		179	982	99	156			41
208	GEOROC	JOLLY, W. T., 1980	48.5	-79.2	IGNEOUS	VOLCANIC	BASALT	2700	0	49	1.83	15.1	3.33			12.56	0.22	4.81	8.38	3.48	0.12
213	GEOROC	JOLLY, W. T., 1980	48.3	-78.85	IGNEOUS	VOLCANIC	ANDESITE	2700	0	51.5	1.49	16.5	2.95			9.91	0.12	6.18	7.53	2.38	0.51
222	GEOROC	JOLLY, W. T., 1980	48.5	-79.2	IGNEOUS	VOLCANIC	BASALT	2700	0	51.6	1.08	17.5	2.58			8.85	0.14	4.31	8.63	2.96	0.2
265	GEOROC	JOLLY, W. T., 1980	48.5	-79.2	IGNEOUS	VOLCANIC	BASALT	2700	0	48.1	0.26	18.7	2.26			12.52	0.14	6.75	5.91	0.47	0.13
287	GEOROC	JOLLY, W. T., 1980	48.5	-79.2	IGNEOUS	VOLCANIC	BASALT	2700	0	49.1	1.25	15.7	2.75			10.83	0.09	6.6	9.88	0.62	0.68
364	GEOROC	JOLLY, W. T., 1980	47.6	-80.1	IGNEOUS	VOLCANIC	BASALT	2700	0	53.7	1.49	14.1	2.99			14.45	0.25	3.7	7.19	3.69	0.1
365	GEOROC	JOLLY, W. T., 1980	48.3	-78.85	IGNEOUS	VOLCANIC	ANDESITE	2700	0	47.4	1.27	14.7	2.77			15.88	0.19	6.08	9.32	2.46	0.12
1054A(68)	GEOROC	JOLLY, W. T., 1980	48.5	-79.2	IGNEOUS	VOLCANIC	BASALT	2700	0	47.8	0.81	16.9	2.63			13.4	0.21	9.43	10.4	0.91	0.19
1060(60)	GEOROC	JOLLY, W. T., 1980	48.5	-79.2	IGNEOUS	VOLCANIC	BASALT	2700	0	49.9	0.95	14	2.41			13.8	0.22	7.64	9.68	1.59	0.24
1071(50)	GEOROC	JOLLY, W. T., 1980	48.5	-79.2	IGNEOUS	VOLCANIC	ANDESITE	2700	0	53.1	1.04	11	2.86			13.5	0.2	7.12	9	1.38	0.17
1075B(46)	GEOROC	JOLLY, W. T., 1980	48.5	-79.2	IGNEOUS	VOLCANIC	BASALT	2700	0	49.3	0.69	13.2	2.46			11.1	0.21	8.48	10.5	1.3	0.68
1093(32)	GEOROC	JOLLY, W. T., 1980	48.5	-79.2	IGNEOUS	VOLCANIC	BASALT	2700	0	45	0.54	10.3	2.86			11.2	0.19	17.9	9	0.79	0.09
1095(26)	GEOROC	JOLLY, W. T., 1980	48.5	-79.2	IGNEOUS	VOLCANIC	BASALT	2700	0	49.5	0.79	10.7	3.31			12.9	0.21	7.8	10.5	2.7	0.17
1116(23)	GEOROC	JOLLY, W. T., 1980	48.5	-79.2	IGNEOUS	VOLCANIC	BASALT	2700	0	46.6	0.5	13.3	2.02			7.85	0.16	9.28	14.9	1.06	0.15
1119(26)	GEOROC	JOLLY, W. T., 1980	48.5	-79.2	IGNEOUS	VOLCANIC	ANDESITE	2700	0	54.7	0.88	12.4	3.36			7.48	0.11	4.08	10.8	2.12	0.25
226S	GEOROC	JOLLY, W. T., 1980	48.5	-79.2	IGNEOUS	VOLCANIC	ANDESITE	2700	0	53.3	1.25	17.1	2.75			8.3	0.1	4.18	5.45	4.88	0.09
241C	GEOROC	JOLLY, W. T., 1980	48.5	-79.2	IGNEOUS	VOLCANIC	BASALT	2700	0	45.5	2.76	13	4.26			17.55	0.29	5.29	7.68	1.27	0.14
242B1	GEOROC	JOLLY, W. T., 1980	48.5	-79.2	IGNEOUS	VOLCANIC	BASALT	2700	0	47.3	2.59	13.4	4.09			17	0.32	5.11	7.34	3.72	0.3
249A	GEOROC	JOLLY, W. T., 1980	48.5	-79.2	IGNEOUS	VOLCANIC	ANDESITE	2700	0	54.2	1.04	15.9	2.54			7.83	0.13	4.18	8.28	4.57	0.18
A803.4	GEOROC	KERRICH, R.; POLAT, A.; XIE, QIANLI, 2008	48.4	-81.3	IGNEOUS	VOLCANIC	BASALT	2700	0	50.49	1.77	14.47		15.76			0.19	4.45	8.14	4.5	0.06	0.16	5.96	7.86	19.67	2.93	14.81	4.13	1.41	5.43	0.86	6.01	1.27	3.9	0.61	3.8	0.59	47	461						108		47	0.37	0.22
A804.6	GEOROC	KERRICH, R.; POLAT, A.; XIE, QIANLI, 2008	48.4	-81.3	IGNEOUS	VOLCANIC	BASALT	2700	0	53.51	2.49	12.29		16.64			0.31	3.58	8.13	2.55	0.2	0.3	6.64	4.35	12.15	1.89	10.22	3.3	1.63	4.36	0.72	4.91	1.04	3.13	0.46	2.97	0.43	46	494						94		81	0.29	0.09
A806.4	GEOROC	KERRICH, R.; POLAT, A.; XIE, QIANLI, 2008	48.4	-81.3	IGNEOUS	VOLCANIC	BASALT	2700	0	48.52	0.96	16.07		12.16			0.18	7.87	12.67	1.47	0.02	0.08	2.85	2.17	6.05	0.96	5.22	1.63	0.74	2.2	0.35	2.38	0.48	1.5	0.23	1.33	0.2	39	285						26		8	0.14	0.03
KJ1	GEOROC	KERRICH, R.; POLAT, A.; XIE, QIANLI, 2008	48.4	-81.3	IGNEOUS	VOLCANIC	BASALT	2700	0	49.68	1.59	13.78		15.43			0.23	6.92	9.68	2.35	0.21	0.13	2.85	4.14	11.39	1.85	10.05	3.02	1.11	4.07	0.7	4.88	1.01	3.17	0.48	2.96	0.47	43	414						74		42	0.2	0.09
KJ2	GEOROC	KERRICH, R.; POLAT, A.; XIE, QIANLI, 2008	48.4	-81.3	IGNEOUS	VOLCANIC	BASALT	2700	0	51.13	1.98	13.47		16.64			0.2	5.8	8.17	2.45	0.04	0.12	9.61	4.91	13.08	2.05	11.1	3.2	1.07	4.55	0.66	4.66	0.98	2.89	0.45	2.9	0.44	45	449						95		38	0.23	0.12
KJ3	GEOROC	KERRICH, R.; POLAT, A.; XIE, QIANLI, 2008	48.4	-81.3	IGNEOUS	VOLCANIC	BASALT	2700	0	52.14	2.48	13.06		16.22			0.21	4.89	6.84	3.34	0.59	0.22	2.45	5.34	14.09	2.21	12	3.69	1.43	5.03	0.82	5.72	1.2	3.65	0.54	3.42	0.5	44	474						90		200	0.26	0.11
KJ6	GEOROC	KERRICH, R.; POLAT, A.; XIE, QIANLI, 2008	48.4	-81.3	IGNEOUS	VOLCANIC	BASALT	2700	0	49.68	2.63	11.96		17.89			0.29	5.9	7.36	3.76	0.25	0.29	2.28	4.86	13.55	2.26	12.6	4.15	1.47	5.39	0.89	6.37	1.32	4.12	0.6	3.89	0.6	45	520						116		113	0.27	0.11
KJ7	GEOROC	KERRICH, R.; POLAT, A.; XIE, QIANLI, 2008	48.4	-81.3	IGNEOUS	VOLCANIC	BASALT	2700	0	52.59	2.06	13.25		15.59			0.2	4.93	7.23	3.84	0.12	0.18	2.28	7.4	21.19	3.4	18.25	5.69	1.68	7.57	1.29	9	1.87	5.8	0.89	5.65	0.85	43	432						135		24	0.42	0.2
KJ7A	GEOROC	KERRICH, R.; POLAT, A.; XIE, QIANLI, 2008	48.4	-81.3	IGNEOUS	VOLCANIC	BASALT	2700	0	47.05	1.83	14.21		17.61			0.3	6.32	10.71	1.52	0.29	0.16	3.26	6.74	19.02	3.09	16.91	5.17	1.68	6.86	1.13	7.93	1.63	5.04	0.75	4.87	0.71	37	407						91		203	0.38	0.17
KJ8	GEOROC	KERRICH, R.; POLAT, A.; XIE, QIANLI, 2008	48.4	-81.3	IGNEOUS	VOLCANIC	BASALT	2700	0	49.64	0.99	15.5		13.53			0.22	7.71	11.03	1.19	0.14	0.06	4.25	1.76	5.05	0.85	4.52	1.54	0.58	2.13	0.36	2.69	0.56	1.7	0.26	1.68	0.27	45	357						36		42	0.1	0.03
KC506A2	GEOROC	KERRICH, R.; WYMAN, D. A.; FAN, J.; BLEEKER, W., 1998	48.65	-81.4	IGNEOUS	VOLCANIC	BONINITE	2700	0	50.5	0.242	14.1		10.8			0.27	15	6.18	2.48		0.032	7.35	0.722	1.81	0.265	1.33	0.447	0.237	0.668	0.144	1.22	0.311	0.954	0.168	1.19	0.179	43.5	160	1058	71.3	499			15.9			0.034	0.011
KC506E	GEOROC	KERRICH, R.; WYMAN, D. A.; FAN, J.; BLEEKER, W., 1998	48.65	-81.4	IGNEOUS	VOLCANIC	BONINITE	2700	0	46.8	0.215	14.4		11.3			0.214	19.4	4.58	2.02		0.032	6.5	0.605	1.68	0.249	1.26	0.496	0.201	0.793	0.17	1.36	0.358	1.19	0.207	1.44	0.209	41.7	158	1166	73.9	530			15.4			0.033	0.043
KC533Q	GEOROC	KERRICH, R.; WYMAN, D. A.; FAN, J.; BLEEKER, W., 1998	48.65	-81.4	IGNEOUS	VOLCANIC	BONINITE	2700	0	53.4	0.345	19		9.12			0.295	4.42	9.57	2.71	0.137	0.021	4.9	1.57	3.66	0.515	2.77	0.903	0.418	1.28	0.249	2.01	0.504	1.63	0.281	1.93	0.29	53.6	208	1054	81.5	406			20			0.054	0.037
PM3	GEOROC	KERRICH, R.; WYMAN, D. A.; FAN, J.; BLEEKER, W., 1998	48.6	-81.15	IGNEOUS	VOLCANIC	BONINITE	2700	0	46.6	0.222	23.1		7.53			0.215	14.5	6.94	0.848		0.032	5.41	0.739	2	0.316	1.62	0.517	0.136	0.768	0.171	1.58	0.425	1.61	0.274	2.15	0.354	65	220	960	73	590			16
PM4	GEOROC	KERRICH, R.; WYMAN, D. A.; FAN, J.; BLEEKER, W., 1998	48.6	-81.15	IGNEOUS	VOLCANIC	BONINITE	2700	0	50.6	0.293	24.9		7.51			0.325	11.8	4.54	0.063		0.039	4.63	1.15	3.43	0.456	2.21	0.701	0.352	1.01	0.232	2.22	0.587	1.96	0.329	2.26	0.371	71	270	600	64	320			26
WV-135	GEOROC	KERRICH, R.; WYMAN, D. A.; FAN, J.; BLEEKER, W., 1998	48.6	-81.15	IGNEOUS	VOLCANIC	BONINITE	2700	0	49.5	0.387	18.2		10.3			0.199	10.3	8.56	2.44	0.006	0.044	9.93	1.56	3.93	0.573	2.82	0.918	0.319	1.27	0.255	1.96	0.508	1.66	0.289	1.93	0.334	45	200	210	46	110			29			0.07	0.03
WV-79	GEOROC	KERRICH, R.; WYMAN, D. A.; FAN, J.; BLEEKER, W., 1998	48.6	-81.15	IGNEOUS	VOLCANIC	BONINITE	2700	0	47.2	0.173	16		11.1			0.197	20.7	4.68	0.023	0.006	0.023	13.1	0.595	1.49	0.218	1.14	0.322	0.158	0.576	0.148	1.28	0.371	0.132	0.222	1.63	0.274	37	150	1220	73	370			9.7			0.03	0.02
WV-87	GEOROC	KERRICH, R.; WYMAN, D. A.; FAN, J.; BLEEKER, W., 1998	48.6	-81.15	IGNEOUS	VOLCANIC	BONINITE	2700	0	50.5	0.365	17.7		10.8			0.171	10.9	6.47	1.66	1.37	0.034	11.5	1.15	3.12	0.49	2.42	0.858	0.322	1.31	0.252	1.91	0.505	1.68	0.28	1.99	0.319	59	150	270	49	130			27			0.07	0.03
51227	GEOROC	KUNO, H., 1950	34.5	138.7	IGNEOUS	VOLCANIC	BASALT	2700	0	51.1	0.83	18.9	3.56		6.52		0.13	5.03	10.8	2.14	0.32	0.13
51227	GEOROC	KUNO, H., 1950	34.5	138.7	IGNEOUS	VOLCANIC	BASALT	2700	0	51.1	0.83	18.9	3.56		6.52		0.13	5.03	10.8	2.14	0.32	0.13
8697	GEOROC	LA FLECHE, M. R.; DUPUY, C., 1992	48.25	-79.02	IGNEOUS	VOLCANIC	ANDESITE	2700	0	54.3	1.24	13.56		12.65			0.22	6.3	7.98	3.58	0.04	0.13		8	21.1		14.7	4.18	1.13		0.99					3.72	0.62	63	368	52	43	43			109			0.39
8700	GEOROC	LA FLECHE, M. R.; DUPUY, C., 1992	48.25	-79.02	IGNEOUS	VOLCANIC	ANDESITE	2700	0	54.5	1.23	13.05		13.2			0.2	5.74	9.26	2.66	0.03	0.13		7.7	20.3		14.4	4.17	1.18		1.01					3.73	0.61	42	368	58	44	43			107			0.4
8701	GEOROC	LA FLECHE, M. R.; DUPUY, C., 1992	48.25	-79.02	IGNEOUS	VOLCANIC	ANDESITE	2700	0	54.8	1.18	13.21		13.05			0.24	5.95	7.66	3.56	0.22	0.13		8.1	22.7		14.5	4.56	1.17		1.01					3.7	0.53	41	326	38	49	40			117			0.45
8709	GEOROC	LA FLECHE, M. R.; DUPUY, C., 1992	48.25	-79.02	IGNEOUS	VOLCANIC	NOT-GIVEN	2700	0	50.1	0.85	12.32		12.03			0.22	12.08	10.05	1.51	0.67	0.17		9.1	21.4		10.1	2.14	0.67		0.26					0.77	0.13	22	210	745	67	470			33			0.13
8726	GEOROC	LA FLECHE, M. R.; DUPUY, C., 1992	48.25	-79.02	IGNEOUS	VOLCANIC	BASALT	2700	0	48.4	1.15	16.78		12.38			0.19	9.03	8.32	1.82	1.68	0.25		10.3	24.8		12.6	3.02	1.03		0.52					1.74	0.29	36	259	180	48	114			61			0.21
8728	GEOROC	LA FLECHE, M. R.; DUPUY, C., 1992	48.25	-79.02	IGNEOUS	VOLCANIC	BASALT	2700	0	50.8	1.33	15.94		13.45			0.2	6.8	9.42	1.77	0.14	0.15		3.3	8.2		6	2.03	0.9		0.47					1.66	0.27	39	296	144	42	51			44			0.16
8685	GEOROC	LA FLECHE, M. R.; DUPUY, C.; BOUGAULT, H., 1992	48.25	-79.02	IGNEOUS	VOLCANIC	NOT-GIVEN	2700	0	53	0.97	21.07		7.98			0.1	7.7	5.54	3.49	0.8	0.2		12.9	29.2		13.8	3.2	1.08		0.56					1.66	0.28	25	196	183		81			121			0.36
8689	GEOROC	LA FLECHE, M. R.; DUPUY, C.; BOUGAULT, H., 1992	48.25	-79.02	IGNEOUS	VOLCANIC	NOT-GIVEN	2700	0	55	1.13	17.44		11.05			0.2	7.1	6.89	1.96		0.18		6.5	16.1		10.3	2.5	0.79		0.44					1.54	0.26	35	283	148		45			53			0.18
8702	GEOROC	LA FLECHE, M. R.; DUPUY, C.; BOUGAULT, H., 1992	48.25	-79.02	IGNEOUS	VOLCANIC	ANDESITE	2700	0	55	1.32	13.8		13.14			0.2	6.05	7.66	3.1	0.22	0.13		9.5	24.7		17.9	4.9	1.15		1.1					4.16	0.68	42	335	36	43	52			120			0.5
8705	GEOROC	LA FLECHE, M. R.; DUPUY, C.; BOUGAULT, H., 1992	48.25	-79.02	IGNEOUS	VOLCANIC	THOLEIITE	2700	0	50.8	1.23	15.8		14.18			0.21	7.95	8.14	1.28	0.04	0.08		2.8	8		6.3	2.2	0.82		0.6					2.25	0.38	41	358	247	49	109			57			0.15
8709	GEOROC	LA FLECHE, M. R.; DUPUY, C.; BOUGAULT, H., 1992	48.25	-79.02	IGNEOUS	VOLCANIC	NOT-GIVEN	2700	0	50	0.85	12.41		12.03			0.2	12	10.1	1.51	0.7	0.17		9.1	21.4		10.1	2.1	0.67		0.26					0.77	0.13	22	210	745		470			33			0.13
8711	GEOROC	LA FLECHE, M. R.; DUPUY, C.; BOUGAULT, H., 1992	48.25	-79.02	IGNEOUS	VOLCANIC	THOLEIITE	2700	0	49.9	1.18	15.28		10.92			0.24	7.77	10.1	3.16	1.12	0.1		5.4	13.4		18	4.1	1.27		1.07					3.84	0.63	45	352	265	44	77			72			0.23
8713	GEOROC	LA FLECHE, M. R.; DUPUY, C.; BOUGAULT, H., 1992	48.25	-79.02	IGNEOUS	VOLCANIC	NOT-GIVEN	2700	0	51	1.26	18.97		8.42			0.2	3.6	11.7	2.76	0.3	0.17		10.4	23.8		12.3	2.7	0.92		0.36					1.02	0.17	18	328	143		123			43			0.18
8719	GEOROC	LA FLECHE, M. R.; DUPUY, C.; BOUGAULT, H., 1992	48.25	-79.02	IGNEOUS	VOLCANIC	NOT-GIVEN	2700	0	55	0.82	19.83		8.24			0.1	4.2	8.75	2.85	0.7	0.13		7.2	16.7		9.1	2.2	0.78		0.4					1.42	0.23	27	184	97		55			78			0.28
8720	GEOROC	LA FLECHE, M. R.; DUPUY, C.; BOUGAULT, H., 1992	48.25	-79.02	IGNEOUS	VOLCANIC	NOT-GIVEN	2700	0	55	1.36	16.1		9.44			0.2	5.6	5.46	4.98	1.1	0.26		14.7	34.8		19.4	4.8	1		0.84					3.02	0.5	32	275	47		35			114			0.42
8734	GEOROC	LA FLECHE, M. R.; DUPUY, C.; BOUGAULT, H., 1992	48.25	-79.02	IGNEOUS	VOLCANIC	ANDESITE	2700	0	54.6	1.8	16.22		16.9			0.17	8.47	0.3	0.21	1.2	0.23		6.5	16.3		9.7	2.8	1.03		0.58					2.08	0.37	36	373	50	20	24			71			0.21
15H	GEOROC	LEGAULT, M. I.; HATTORI, H., 1994	48.17	-79.75	IGNEOUS	VOLCANIC	TRACHYTE	2700	0	47.5	0.48	14.9	7.47					3.58	7.43	1.21	7.37	0.32	7.49																142	55		81	86		232		4358
1H	GEOROC	LEGAULT, M. I.; HATTORI, H., 1994	48.17	-79.75	IGNEOUS	VOLCANIC	TRACHYTE	2700	0	49	0.5	17.1	6.35					3.57	6.47	3.15	6.35	0.31	6.59																174	13		55	85		313		4272
1N	GEOROC	LEGAULT, M. I.; HATTORI, H., 1994	48.17	-79.75	IGNEOUS	VOLCANIC	NOT-GIVEN	2700	0	50.1	0.67	14.4	21.7				0.12	11.4	13.5		0.01	0.02	17.1																	5043		1348	607		32		60
1W	GEOROC	LEGAULT, M. I.; HATTORI, H., 1994	48.17	-79.75	IGNEOUS	VOLCANIC	NOT-GIVEN	2700	0	50.4	1.15	14.6	13.7					8.53	3.69	1.75	0.11	0.1	6.14																371	163		118	167		24		1193
39G	GEOROC	LEGAULT, M. I.; HATTORI, H., 1994	48.17	-79.75	IGNEOUS	VOLCANIC	NOT-GIVEN	2700	0	51.4	0.5	11.1	12				0.08	11.3	3.71	0.65	0.54	0.03	8.5																	2889		916	124		25		237
43B	GEOROC	LEGAULT, M. I.; HATTORI, H., 1994	48.17	-79.75	IGNEOUS	VOLCANIC	NOT-GIVEN	2700	0	45.9	0.89	16.5	6.49				0.16	2.96	11.1	6.25	0.4	0.25	9.8																	171			11		99		166
M1	GEOROC	MANIKYAMBA, C.; KERRICH, R.; KHANNA, T. C.; KESHAV KRISHNA, A.; SATYANARAYANAN, M., 2008	15.08	76.76	IGNEOUS	VOLCANIC	BASALT	2700	0	53.96	0.52	10.44		13.67			0.2	8.57	8.47	1.75	0.65	0.05	1.81	2.46	6.82	0.87	5.45	1.65	0.59	2.28	0.42	2.43	0.52	1.68	0.3	1.55	0.24	39	227	553	62	110	47	27	35		108	0.5	0.13
M127	GEOROC	MANIKYAMBA, C.; KERRICH, R.; KHANNA, T. C.; KESHAV KRISHNA, A.; SATYANARAYANAN, M., 2008	15.08	76.76	IGNEOUS	VOLCANIC	BASALT	2700	0	51.33	0.54	11.85		12.93			0.2	11.1	7.95	2.2	0.45	0.05	1.7	2.22	6.96	0.88	5.81	1.82	0.59	2.59	0.48	2.82	0.63	1.92	0.33	1.73	0.25	42	252	596	53	90	57	29	32		49	0.46	0.17
M141	GEOROC	MANIKYAMBA, C.; KERRICH, R.; KHANNA, T. C.; KESHAV KRISHNA, A.; SATYANARAYANAN, M., 2008	15.08	76.76	IGNEOUS	VOLCANIC	BASALT	2700	0	53.96	0.62	11.84		13.03			0.17	7.98	8.79	2.28	0.2	0.06	1.82	2.47	7.12	0.91	5.79	1.67	0.7	2.43	0.44	2.57	0.55	1.82	0.32	1.7	0.26	42	259	473	56	66	43	48	22		42	0.35	0.11
M151	GEOROC	MANIKYAMBA, C.; KERRICH, R.; KHANNA, T. C.; KESHAV KRISHNA, A.; SATYANARAYANAN, M., 2008	15.08	76.76	IGNEOUS	VOLCANIC	BASALT	2700	0	51.81	0.51	10.82		12.14			0.19	11.85	8.14	2.35	0.27	0.06	2	1.98	6.07	0.77	5.01	1.54	0.47	2.09	0.39	2.26	0.5	1.58	0.28	1.48	0.23	37	234	473	57	96	43	22	26		70	0.37	0.1
M156	GEOROC	MANIKYAMBA, C.; KERRICH, R.; KHANNA, T. C.; KESHAV KRISHNA, A.; SATYANARAYANAN, M., 2008	15.08	76.76	IGNEOUS	VOLCANIC	BASALT	2700	0	51.99	0.56	9.55		12.92			0.21	12.85	7.98	2.41	0.37	0.06	1.96	2.15	6.49	0.81	5.2	1.55	0.54	2.24	0.41	2.43	0.53	1.73	0.3	1.66	0.26	40	253	543	57	73	53	36	36		64	0.41	0.12
M160	GEOROC	MANIKYAMBA, C.; KERRICH, R.; KHANNA, T. C.; KESHAV KRISHNA, A.; SATYANARAYANAN, M., 2008	15.08	76.76	IGNEOUS	VOLCANIC	BASALT	2700	0	53.72	0.65	11.88		12.86			0.17	7.99	8.43	2.46	0.36	0.07	1.88	2.79	7.53	0.99	6.33	1.95	0.68	2.56	0.49	2.89	0.62	2.03	0.34	1.82	0.29	42	283	446	56	64	47	20	21		92	0.36	0.1
M2	GEOROC	MANIKYAMBA, C.; KERRICH, R.; KHANNA, T. C.; KESHAV KRISHNA, A.; SATYANARAYANAN, M., 2008	15.08	76.76	IGNEOUS	VOLCANIC	BASALT	2700	0	53.94	0.56	10.67		14.37			0.19	8.79	7.51	1.66	0.53	0.06	2	2.57	7.35	0.93	5.79	1.68	0.64	2.42	0.44	2.51	0.53	1.79	0.31	1.58	0.25	39	238	609	67	103	50	25	27		89	0.45	0.12
M3	GEOROC	MANIKYAMBA, C.; KERRICH, R.; KHANNA, T. C.; KESHAV KRISHNA, A.; SATYANARAYANAN, M., 2008	15.08	76.76	IGNEOUS	VOLCANIC	BASALT	2700	0	53.84	0.55	11.85		12.59			0.17	8.62	7.68	2.72	0.28	0.07	1.72	2.69	7.34	0.87	5.5	1.56	0.47	2.23	0.4	2.28	0.49	1.6	0.28	1.53	0.23	34	220	439	47	69	45	76	24		43	0.36	0.15
MAN164	GEOROC	MANIKYAMBA, C.; KERRICH, R.; KHANNA, T. C.; KESHAV KRISHNA, A.; SATYANARAYANAN, M., 2008	15.08	76.76	IGNEOUS	VOLCANIC	BASALT	2700	0	51.7	0.55	10.42		12.55			0.18	11.96	8.44	2.58	0.11	0.06	2	2.25	6.59	0.87	5.78	1.75	0.64	2.44	0.45	2.69	0.57	1.85	0.32	1.72	0.26	40	263	537	58	84	51	36	24		41	0.42	0.12
MAN169	GEOROC	MANIKYAMBA, C.; KERRICH, R.; KHANNA, T. C.; KESHAV KRISHNA, A.; SATYANARAYANAN, M., 2008	15.08	76.76	IGNEOUS	VOLCANIC	BASALT	2700	0	53.65	0.6	10.88		15.08			0.19	8.31	7.23	2.06	0.3	0.05	2	2.03	6.61	0.84	5.45	1.55	0.57	2.27	0.41	2.43	0.53	1.74	0.3	1.58	0.24	38	251	611	65	112	54	15	27		55	0.31	0.09
S38	GEOROC	MANIKYAMBA, C.; KERRICH, R.; KHANNA, T. C.; KESHAV KRISHNA, A.; SATYANARAYANAN, M., 2008	15.1	76.76	IGNEOUS	VOLCANIC	BASALT	2700	0	53.08	0.7	12.03		11.37			0.17	8.74	10.2	2.93	0.28	0.06	0.65	2.88	7.81	1.18	5.6	1.73	0.65	2.34	0.41	2.56	0.56	1.69	0.4	1.65	0.23	56	345	549	59	94	50	47	45		30	0.16	0.12
S40	GEOROC	MANIKYAMBA, C.; KERRICH, R.; KHANNA, T. C.; KESHAV KRISHNA, A.; SATYANARAYANAN, M., 2008	15.1	76.76	IGNEOUS	VOLCANIC	BASALT	2700	0	49.74	1.03	15.18		12.39			0.24	8.48	9.23	2.48	0.58	0.09	1.11	3.64	8.99	1.4	6.99	2.12	0.88	3.09	0.54	3.62	0.82	2.38	0.37	2.44	0.37	60	369	401	75	153	107	180	55		50	0.57	0.08
S43	GEOROC	MANIKYAMBA, C.; KERRICH, R.; KHANNA, T. C.; KESHAV KRISHNA, A.; SATYANARAYANAN, M., 2008	15.1	76.76	IGNEOUS	VOLCANIC	BASALT	2700	0	49.09	0.84	15.15		13.01			0.27	6.84	9.68	3.18	0.57	0.08	0.55	4.65	11.29	1.57	7.64	2.19	0.98	3.1	0.53	3.58	0.77	2.25	0.34	2.14	0.29	33	341	437	67	152	104	6	60		135	0.2	0.16
S48	GEOROC	MANIKYAMBA, C.; KERRICH, R.; KHANNA, T. C.; KESHAV KRISHNA, A.; SATYANARAYANAN, M., 2008	15.1	76.76	IGNEOUS	VOLCANIC	BASALT	2700	0	49.96	0.79	14.75		11.39			0.23	8.25	8.75	3.37	0.5	0.09	1.01	5.21	13.27	1.86	9.05	2.33	0.88	3.41	0.58	3.83	0.84	2.58	0.38	2.67	0.39	31	300	550	61	154	89	92	51		170	0.25	0.26
S51	GEOROC	MANIKYAMBA, C.; KERRICH, R.; KHANNA, T. C.; KESHAV KRISHNA, A.; SATYANARAYANAN, M., 2008	15.1	76.76	IGNEOUS	VOLCANIC	BASALT	2700	0	49.19	0.96	13.86		14.31			0.24	7.43	8.97	2.82	0.27	0.09	0.91	5.38	13.34	1.88	8.63	2.65	0.96	3.71	0.65	4.29	0.93	2.52	0.39	2.45	0.39	33	381	335	68	97	100	26	57		55	0.25	0.24
S53	GEOROC	MANIKYAMBA, C.; KERRICH, R.; KHANNA, T. C.; KESHAV KRISHNA, A.; SATYANARAYANAN, M., 2008	15.1	76.76	IGNEOUS	VOLCANIC	BASALT	2700	0	50.95	0.92	13.88		11.42			0.24	7.29	10.02	2.78	0.47	0.07	1.06	3.26	8.84	1.43	7.08	2.33	1.12	3.23	0.56	3.9	0.84	2.43	0.36	2.4	0.36	65	336	386	64	167	103	100	52		73	0.19	0.06
S57	GEOROC	MANIKYAMBA, C.; KERRICH, R.; KHANNA, T. C.; KESHAV KRISHNA, A.; SATYANARAYANAN, M., 2008	15.1	76.76	IGNEOUS	VOLCANIC	BASALT	2700	0	52.73	0.68	11.15		11.77			0.19	10.05	9.4	2.77	0.39	0.05	0.6	2.53	6.94	1.1	5.17	1.62	0.62	2.39	0.39	2.76	0.56	1.7	0.24	1.7	0.24	58	270	836	65	126	58	192	41		72	0.16	0.1
S60	GEOROC	MANIKYAMBA, C.; KERRICH, R.; KHANNA, T. C.; KESHAV KRISHNA, A.; SATYANARAYANAN, M., 2008	15.1	76.76	IGNEOUS	VOLCANIC	BASALT	2700	0	54.02	0.66	11.58		11.08			0.17	9.45	8.62	3.41	0.18	0.08	0.4	2.76	8.16	1.26	5.81	2.31	0.7	2.81	0.47	3.13	0.72	2.12	0.31	1.87	0.26	25	308	712	63	117	49	48	35		20	0.22	0.08
S63	GEOROC	MANIKYAMBA, C.; KERRICH, R.; KHANNA, T. C.; KESHAV KRISHNA, A.; SATYANARAYANAN, M., 2008	15.1	76.76	IGNEOUS	VOLCANIC	BASALT	2700	0	50.7	0.67	11.29		11.82			0.19	11.26	9.25	2.43	0.51	0.06	1.01	2.22	6.13	0.99	4.73	1.52	0.62	2.32	0.38	2.63	0.55	1.6	0.23	1.64	0.23	52	255	887	73	217	74	22	38		75	0.19	0.16
S65	GEOROC	MANIKYAMBA, C.; KERRICH, R.; KHANNA, T. C.; KESHAV KRISHNA, A.; SATYANARAYANAN, M., 2008	15.1	76.76	IGNEOUS	VOLCANIC	BASALT	2700	0	53.53	0.67	11.29		10.63			0.17	9.43	9.4	3.25	0.18	0.06	0.5	2.32	6.82	1.11	5.12	1.33	0.6	2.2	0.39	2.74	0.6	1.72	0.26	1.72	0.21	49	363	690	61	107	49	18	29		29	0.18	0.12
S9	GEOROC	MANIKYAMBA, C.; KERRICH, R.; KHANNA, T. C.; KESHAV KRISHNA, A.; SATYANARAYANAN, M., 2008	15.1	76.76	IGNEOUS	VOLCANIC	BASALT	2700	0	53.88	0.61	10.81		10.44			0.19	10.47	9.32	2.84	0.47	0.06	0.6	2.03	5.87	0.94	4.5	1.42	0.47	1.97	0.33	2.26	0.5	1.41	0.2	1.36	0.21	50	238	609	60	174	46	9	34		67	0.15	0.06
P21	GEOROC	MANIKYAMBA, C.; KERRICH, R.; NAQVI, S. M.; RAM MOHAN, M., 2004	14.75	77.25	IGNEOUS	VOLCANIC	BASALT	2700	0	50.97	0.64	13.33		11.84			0.18	8.86	11.3	0.28	1.95	0.05	0.95	1.92	5.19	0.84	4.4	1.47	0.6	2.17	0.4	2.68	0.58	1.69	0.26	1.72	0.25	60	352	436	63	148	71	126	36		41	0.1
P22	GEOROC	MANIKYAMBA, C.; KERRICH, R.; NAQVI, S. M.; RAM MOHAN, M., 2004	14.75	77.25	IGNEOUS	VOLCANIC	BASALT	2700	0	48.61	0.75	14.89		12			0.18	8.68	11.31	0.27	1.89	0.06	0.6	2.23	6.32	0.99	5.32	1.74	0.7	2.72	0.47	3.26	0.7	2.2	0.33	2.17	0.32	59	380	328	65	171	76	134	43		24	0.12
P23	GEOROC	MANIKYAMBA, C.; KERRICH, R.; NAQVI, S. M.; RAM MOHAN, M., 2004	14.75	77.25	IGNEOUS	VOLCANIC	BASALT	2700	0	50.02	0.63	13.77		11.99			0.18	9.73	10.78	0.18	2.49	0.05	0.7	1.87	5.01	0.83	4.1	1.31	0.61	1.92	0.35	2.53	0.62	1.76	0.24	1.63	0.26	63	386	558	64	159	74	83	29		50	0.08
P24	GEOROC	MANIKYAMBA, C.; KERRICH, R.; NAQVI, S. M.; RAM MOHAN, M., 2004	14.75	77.25	IGNEOUS	VOLCANIC	BASALT	2700	0	49.9	0.64	13.22		12.3			0.2	10.08	10.45	0.18	2.44	0.05	0.35	1.84	4.95	0.84	4.25	1.44	0.49	2.06	0.38	2.64	0.57	1.64	0.27	1.66	0.26	61	378	569	63	164	78	187	34		55	0.09
P25	GEOROC	MANIKYAMBA, C.; KERRICH, R.; NAQVI, S. M.; RAM MOHAN, M., 2004	14.75	77.25	IGNEOUS	VOLCANIC	BASALT	2700	0	51.97	0.57	12.55		11.76			0.18	9.19	10.78	0.17	2.31	0.05	0.8	2.2	5.88	0.9	4.29	1.46	0.54	2.06	0.35	2.44	0.52	1.64	0.24	1.6	0.23	60	355	547	61	93	67	49	38		26	0.1	0.06
P27	GEOROC	MANIKYAMBA, C.; KERRICH, R.; NAQVI, S. M.; RAM MOHAN, M., 2004	14.75	77.25	IGNEOUS	VOLCANIC	BASALT	2700	0	51.72	0.56	12.22		11.6			0.19	8.87	10.23	0.45	2.41	0.05	1.65	2.1	5.66	0.88	4.38	1.38	0.54	1.98	0.34	2.37	0.54	1.55	0.23	1.63	0.23	59	368	525	62	98	72	79	36		79	0.1	0.08
P28	GEOROC	MANIKYAMBA, C.; KERRICH, R.; NAQVI, S. M.; RAM MOHAN, M., 2004	14.75	77.25	IGNEOUS	VOLCANIC	BASALT	2700	0	51.56	0.69	14.36		11.13			0.17	7.66	10.89	0.79	1.7	0.06	0.95	2.31	6.22	0.97	4.83	1.69	0.65	2.39	0.44	3	0.66	2.04	0.3	1.9	0.3	58	276	284	56	128	88	88	45		107	0.11	0.05
P31	GEOROC	MANIKYAMBA, C.; KERRICH, R.; NAQVI, S. M.; RAM MOHAN, M., 2004	14.75	77.25	IGNEOUS	VOLCANIC	BASALT	2700	0	50.54	0.6	12.93		11.66			0.18	8.71	12.97	0.22	1.63	0.05	0.45	1.63	4.62	0.75	3.95	1.33	0.58	1.99	0.33	2.35	0.5	1.63	0.22	1.58	0.24	56	372	540	63	169	68	62	31		28	0.09	0.11
P32	GEOROC	MANIKYAMBA, C.; KERRICH, R.; NAQVI, S. M.; RAM MOHAN, M., 2004	14.75	77.25	IGNEOUS	VOLCANIC	BASALT	2700	0	53.05	0.56	12.41		11.29			0.16	9.19	9.76	0.17	2.65	0.05	0.45	2.28	5.81	0.83	4.48	1.32	0.49	1.88	0.34	2.38	0.56	1.6	0.25	1.67	0.25	56	315	512	60	97	78	77	32		48	0.1	0.07
P33	GEOROC	MANIKYAMBA, C.; KERRICH, R.; NAQVI, S. M.; RAM MOHAN, M., 2004	14.75	77.25	IGNEOUS	VOLCANIC	BASALT	2700	0	50.71	0.64	13.41		11.16			0.17	8.86	11.74	0.13	2	0.05	1.1	1.78	4.85	0.78	4.14	1.45	0.54	1.98	0.36	2.55	0.55	1.66	0.24	1.58	0.24	60	391	527	62	153	96	105	34		24	0.09
P35	GEOROC	MANIKYAMBA, C.; KERRICH, R.; NAQVI, S. M.; RAM MOHAN, M., 2004	14.75	77.25	IGNEOUS	VOLCANIC	BASALT	2700	0	46.65	0.73	14.58		13.46			0.2	10.22	10.84	0.56	1.36	0.05	0.8	1.81	5.34	0.88	4.78	1.67	0.59	2.34	0.4	2.77	0.61	1.71	0.27	1.75	0.27	68	435	671	78	220	87	121	37		61	0.11	0.04
P36	GEOROC	MANIKYAMBA, C.; KERRICH, R.; NAQVI, S. M.; RAM MOHAN, M., 2004	14.75	77.25	IGNEOUS	VOLCANIC	BASALT	2700	0	49.86	0.73	14.9		11.5			0.16	7.88	11.72	0.3	2.08	0.06	0.8	2.31	6.44	1.01	5.09	1.73	0.66	2.59	0.45	3.15	0.7	2.06	0.31	2.08	0.3	59	371	315	59	142	20	20	44		32	0.12	0.05
P40	GEOROC	MANIKYAMBA, C.; KERRICH, R.; NAQVI, S. M.; RAM MOHAN, M., 2004	14.75	77.25	IGNEOUS	VOLCANIC	BASALT	2700	0	49.23	0.75	15.14		11.92			0.18	8.68	11.1	0.29	2.03	0.07	0.6	2.17	6.3	1.02	5.19	1.81	0.69	2.62	0.47	3.1	0.69	2.11	0.31	2.06	0.31	58	389	329	65	170	82	104	44		28	0.11	0.04
P41	GEOROC	MANIKYAMBA, C.; KERRICH, R.; NAQVI, S. M.; RAM MOHAN, M., 2004	14.75	77.25	IGNEOUS	VOLCANIC	BASALT	2700	0	50.48	0.71	14.4		11.47			0.16	8.37	11.09	0.26	2.07	0.06	1.05	2.22	6.15	0.96	5.04	1.7	0.66	2.48	0.42	3.04	0.66	2.03	0.3	1.9	0.31	58	361	340	60	144	73	85	43		28	0.11	0.06
P42	GEOROC	MANIKYAMBA, C.; KERRICH, R.; NAQVI, S. M.; RAM MOHAN, M., 2004	14.75	77.25	IGNEOUS	VOLCANIC	BASALT	2700	0	50.99	0.59	13.2		10.97			0.18	8.05	13.97	0.11	1.04	0.05	0.7	1.63	4.66	0.78	3.85	1.36	0.6	2.01	0.36	2.5	0.53	1.61	0.25	1.59	0.24	58	384	539	59	158	63	41	33		15	0.08	0.03
P44	GEOROC	MANIKYAMBA, C.; KERRICH, R.; NAQVI, S. M.; RAM MOHAN, M., 2004	14.75	77.25	IGNEOUS	VOLCANIC	BASALT	2700	0	50.68	0.72	14.91		11.5			0.16	7.88	11.62	0.36	1.79	0.06	1.1	2.21	6.14	0.99	4.87	1.68	0.68	2.48	0.45	2.99	0.66	2.08	0.31	2.01	0.29	57	368	296	58	145	120	120	43		52	0.12	0.05
SIG-100	GEOROC	MANIKYAMBA, C.; KERRICH, R.; POLAT, A.; SAHA, A., 2013	13.08	76	IGNEOUS	VOLCANIC	BASALT	2700	0	55	0.79	10.07		7.91			0.14	12.4	7.77	0.42	0.11	0.17	5.25	5.4	10.33	1.77	7.78	2.12	0.7	2.8	0.51	2.89	0.62	1.81	0.25	1.56	0.22	16	157	1853	66	528	70	45	52	13		0.04	0.21
SIG-113	GEOROC	MANIKYAMBA, C.; KERRICH, R.; POLAT, A.; SAHA, A., 2013	13.08	76	IGNEOUS	VOLCANIC	BASALT	2700	0	50.9	0.98	13.43		10.67			0.11	16.2	2.25	0.07	0.16	0.08	4.78	3.77	8.38	1.26	5.8	1.73	0.48	2.4	0.43	2.43	0.5	1.47	0.21	1.25	0.18	19	180	3278	104	969	90	396	64	23		0.07	0.3
SIG-114	GEOROC	MANIKYAMBA, C.; KERRICH, R.; POLAT, A.; SAHA, A., 2013	13.08	76	IGNEOUS	VOLCANIC	BASALT	2700	0	50.8	0.84	12.13		10.1			0.15	16.9	3.96	0.09	0.05	0.18	4.31	5.52	11.87	1.84	8.37	2.37	0.68	2.88	0.47	2.46	0.52	1.56	0.21	1.32	0.2	18	171	2739	102	1100	84	997	54	20		0.04	0.26
SIG-115	GEOROC	MANIKYAMBA, C.; KERRICH, R.; POLAT, A.; SAHA, A., 2013	13.08	76	IGNEOUS	VOLCANIC	BASALT	2700	0	52.3	0.89	11.14		10.69			0.18	15.2	4.71	0.13	0.06	0.13	3.96	3.53	7.68	1.18	5.57	1.65	0.55	2.44	0.48	2.78	0.58	1.73	0.24	1.52	0.23	20	171	2944	99	739	93	90	59	22		0.04	0.26
SIG-40	GEOROC	MANIKYAMBA, C.; KERRICH, R.; POLAT, A.; SAHA, A., 2013	13.08	76	IGNEOUS	VOLCANIC	BASALT	2700	0	54.9	0.62	12.5		8.1			0.09	16.6	3.62	0.08	0.04	0.07	2.95	5.93	11.81	1.83	8.19	2.3	0.68	3.01	0.52	2.79	0.58	1.72	0.23	1.44	0.22	16	151	1705	60	526	52	39	69	13		0.04	0.44
SIG-43	GEOROC	MANIKYAMBA, C.; KERRICH, R.; POLAT, A.; SAHA, A., 2013	13.08	76	IGNEOUS	VOLCANIC	BASALT	2700	0	50	0.95	13.14		10.15			0.14	14.8	5.95	0.35	0.08	0.13	3.7	2.19	6.34	0.87	4.26	1.54	0.58	2.2	0.48	2.88	0.62	1.86	0.26	1.75	0.26	22	194	2338	89	981	134	144	69	16		0.06	0.25
SIG-44	GEOROC	MANIKYAMBA, C.; KERRICH, R.; POLAT, A.; SAHA, A., 2013	13.08	76	IGNEOUS	VOLCANIC	BASALT	2700	0	47.9	0.84	12.85		10.27			0.16	16.1	7.02	0.22	0.07	0.09	4.32	3.46	8.51	1.35	6.21	1.91	0.74	2.53	0.5	2.79	0.6	1.78	0.25	1.57	0.24	19	168	2378	86	936	102	77	66	16		0.04	0.28
SIG-47	GEOROC	MANIKYAMBA, C.; KERRICH, R.; POLAT, A.; SAHA, A., 2013	13.08	76	IGNEOUS	VOLCANIC	BASALT	2700	0	50.1	0.91	13.16		9.81			0.12	18.3	3.45	0.12	0.09	0.06	4.7	4.3	14.08	1.58	7.02	2.04	0.48	2.81	0.5	2.78	0.6	1.78	0.24	1.54	0.23	21	187	2366	82	759	90	245	73	16		0.05	0.26
SIG-97	GEOROC	MANIKYAMBA, C.; KERRICH, R.; POLAT, A.; SAHA, A., 2013	13.08	76	IGNEOUS	VOLCANIC	BASALT	2700	0	50.1	0.69	13.77		9.29			0.09	16.4	3.31	0.14	0.12	0.06	5.63	3.23	10.73	1.23	5.49	1.83	0.6	2.53	0.49	2.85	0.6	1.8	0.25	1.61	0.23	18	157	2059	65	611	64	69	80	16		0.06	0.34
KA-348	GEOROC	MARSH, J. S.; BOWEN, M. P.; ROGERS, N. W.; BOWEN, T. B., 1992	-26.87	26.67	IGNEOUS	VOLCANIC	BASALT	2700	0	53.26	1.08	15.13		12.27			0.13	5.16	8.13	3.8	0.87	0.165	2.23															16.5	171	64	63	167	103	122	118		391
KA-376	GEOROC	MARSH, J. S.; BOWEN, M. P.; ROGERS, N. W.; BOWEN, T. B., 1992	-26.87	26.67	IGNEOUS	VOLCANIC	BASALT	2700	0	52.77	1.17	16.66		12.23			0.16	4.66	6.81	3.39	1.97	0.173	5.54															19.7	188	86	59	173	95	59	137		355
KA-452	GEOROC	MARSH, J. S.; BOWEN, M. P.; ROGERS, N. W.; BOWEN, T. B., 1992	-26.87	26.67	IGNEOUS	VOLCANIC	BASALT	2700	0	53.91	1.05	13.76		12.3			0.15	6.57	9.52	2.23	0.38	0.139	4.15				14.06	3.294										21.8	194	415	64	226	73	109	106		241
KL-131	GEOROC	MARSH, J. S.; BOWEN, M. P.; ROGERS, N. W.; BOWEN, T. B., 1992	-26.87	26.67	IGNEOUS	VOLCANIC	BASALT	2700	0	54.1	0.77	13.79		11.51			0.18	6.62	7.12	3.72	2.09	0.098	1.79	10.1	20.5		11.72	2.76	0.73		0.47					1.52	0.27	25	193	272	64	172	90	79	86		328	0.28
KL-135	GEOROC	MARSH, J. S.; BOWEN, M. P.; ROGERS, N. W.; BOWEN, T. B., 1992	-26.87	26.67	IGNEOUS	VOLCANIC	BASALT	2700	0	53.1	0.49	10.35		11.88			0.18	13.62	8.29	1.85	0.18	0.046	3.35	4.8	11.4		7.038	1.789	0.47		0.31					1.08	0.19	29.4	171	2086	78	438	78	52	43		70	0.14
KL-138	GEOROC	MARSH, J. S.; BOWEN, M. P.; ROGERS, N. W.; BOWEN, T. B., 1992	-26.87	26.67	IGNEOUS	VOLCANIC	BASALT	2700	0	51.82	0.69	15.13		11.94			0.2	6.84	8.46	3.37	1.46	0.087	2.94	9	18.5		8.9	2.23	0.82		0.42					1.45	0.25	26.7	197	215	67	166	81	80	71		644	0.22
KL-140	GEOROC	MARSH, J. S.; BOWEN, M. P.; ROGERS, N. W.; BOWEN, T. B., 1992	-26.87	26.67	IGNEOUS	VOLCANIC	BASALT	2700	0	53.32	0.53	11.3		10.99			0.21	9.91	9.44	2.39	1.85	0.059	1.55	6	13.4		7.3	1.68	0.68		0.34					1.32	0.21	46.6	201	783	66	281	81	55	45		468	0.19
KL-141	GEOROC	MARSH, J. S.; BOWEN, M. P.; ROGERS, N. W.; BOWEN, T. B., 1992	-26.87	26.67	IGNEOUS	VOLCANIC	BASALT	2700	0	52.54	0.57	11.87		11.69			0.18	10.6	9.21	1.58	1.68	0.078	2.74	4.3	11.8		7.423	1.913	0.53		0.33					1.18	0.21	36.5	219	900	75	308	76	64	52		599	0.14
KL-142	GEOROC	MARSH, J. S.; BOWEN, M. P.; ROGERS, N. W.; BOWEN, T. B., 1992	-26.87	26.67	IGNEOUS	VOLCANIC	BASALT	2700	0	50.97	0.63	13.46		12.06			0.18	8.33	10.55	3.08	0.68	0.064	2.69	6.5	13.5		8.54	2.07	0.62		0.35					1.32	0.24	32.9	224	475	71	221	93	79	56		206	0.13
KL-146	GEOROC	MARSH, J. S.; BOWEN, M. P.; ROGERS, N. W.; BOWEN, T. B., 1992	-26.87	26.67	IGNEOUS	VOLCANIC	BASALT	2700	0	51.77	0.52	12.72		11.08			0.19	12.87	7.19	1.98	1.6	0.078	4	6.7	16.1		8.554	2.062	0.58		0.37					1.34	0.23	27.7	190	1369	72	422	118	48	60		433	0.21
KL-153	GEOROC	MARSH, J. S.; BOWEN, M. P.; ROGERS, N. W.; BOWEN, T. B., 1992	-26.87	26.67	IGNEOUS	VOLCANIC	BASALT	2700	0	52.25	0.74	15.38		12.1			0.23	7.11	6.29	3.31	2.49	0.102	2.57															30.1	207	171	67	163	97	82	81		680
KL-154	GEOROC	MARSH, J. S.; BOWEN, M. P.; ROGERS, N. W.; BOWEN, T. B., 1992	-26.87	26.67	IGNEOUS	VOLCANIC	BASALT	2700	0	53.59	0.48	12.73		10.79			0.18	10.75	7.75	2.16	1.52	0.07	3.12	8.2	17.7		9.666	2.209	0.71		0.32					1.26	0.2	25	156	1200	69	294	92	56	56		435	0.12
KL-157	GEOROC	MARSH, J. S.; BOWEN, M. P.; ROGERS, N. W.; BOWEN, T. B., 1992	-26.87	26.67	IGNEOUS	VOLCANIC	BASALT	2700	0	54.23	0.42	10.58		10.86			0.17	14.27	7.68	1.64	0.12	0.042	4.4	5.6	12.8		7	1.37	0.46		0.31					1.22	0.2	29.2	171	2289	76	402	114	45	41		49	0.11
KL-159	GEOROC	MARSH, J. S.; BOWEN, M. P.; ROGERS, N. W.; BOWEN, T. B., 1992	-26.87	26.67	IGNEOUS	VOLCANIC	BASALT	2700	0	53.82	0.41	10.57		11.24			0.19	14.07	7.94	1.4	0.28	0.066	4.42	4.2	9.6		4.9	1.28	0.38		0.23					1	0.19	31.5	171	1771	78	405	112	40	41		120	0.1
KL-468	GEOROC	MARSH, J. S.; BOWEN, M. P.; ROGERS, N. W.; BOWEN, T. B., 1992	-26.87	26.67	IGNEOUS	VOLCANIC	BASALT	2700	0	52.81	0.4	8.59		12.17			0.17	17.46	8.06	0.19	0.11	0.039	4.95	3.9	10.2		4.275	1.085	0.43		0.24					0.9	0.15	27.7	178	2618	88	516	76	43	34		16	0.11
KO-109	GEOROC	MARSH, J. S.; BOWEN, M. P.; ROGERS, N. W.; BOWEN, T. B., 1992	-26.87	26.67	IGNEOUS	VOLCANIC	BASALT	2700	0	53.8	1.08	14.9		13.94			0.17	5.53	5.81	3.43	1.22	0.127	2.19															27	249	72	75	163	105	104	103		505
KO-110	GEOROC	MARSH, J. S.; BOWEN, M. P.; ROGERS, N. W.; BOWEN, T. B., 1992	-26.87	26.67	IGNEOUS	VOLCANIC	BASALT	2700	0	54.3	1.05	14.77		13.22			0.15	5.19	6.49	3.91	0.79	0.12	2	12.4	28.5		14.1	3.47	1.12		0.59					1.79	0.27	25.8	239	79	74	160	95	113	104		249	0.37
KO-111	GEOROC	MARSH, J. S.; BOWEN, M. P.; ROGERS, N. W.; BOWEN, T. B., 1992	-26.87	26.67	IGNEOUS	VOLCANIC	BASALT	2700	0	52.31	1.1	15.54		14.46			0.17	5.49	5.66	3.9	0.95	0.126	2.11	13.2	28.7		16.97	4.051	1.06		0.59					1.76	0.32	28.3	258	72	79	163	107	112	109		278	0.41
KO-112	GEOROC	MARSH, J. S.; BOWEN, M. P.; ROGERS, N. W.; BOWEN, T. B., 1992	-26.87	26.67	IGNEOUS	VOLCANIC	BASALT	2700	0	53.26	1	14.96		12.77			0.15	4.49	9.82	2.69	0.76	0.121	1.89	14.1	27.3		12.4	3.41	1.33		0.6					1.77	0.29	25.3	234	65	75	152	93	119	98		251	0.37
KO-118	GEOROC	MARSH, J. S.; BOWEN, M. P.; ROGERS, N. W.; BOWEN, T. B., 1992	-26.87	26.67	IGNEOUS	VOLCANIC	BASALT	2700	0	53.26	0.93	15.05		11.78			0.13	4.8	10.66	2.91	0.34	0.134	2.34															20.4	228	49	63	143	76	65	91		128
KO-126	GEOROC	MARSH, J. S.; BOWEN, M. P.; ROGERS, N. W.; BOWEN, T. B., 1992	-26.87	26.67	IGNEOUS	VOLCANIC	BASALT	2700	0	51.87	0.93	15.27		12.87			0.16	5.47	8.24	3.22	1.85	0.123	1.98	12	25.6		17.05	3.88	1.27		0.54					1.69	0.3	23.2	209	26	63	133	94	96	96		453	0.29
KO-129	GEOROC	MARSH, J. S.; BOWEN, M. P.; ROGERS, N. W.; BOWEN, T. B., 1992	-26.87	26.67	IGNEOUS	VOLCANIC	BASALT	2700	0	51.11	1.01	15.59		13.72			0.16	4.85	9.28	3.22	0.91	0.134	2.05															26.6	235	28	72	131	104	103	107		178
NL-791	GEOROC	MARSH, J. S.; BOWEN, M. P.; ROGERS, N. W.; BOWEN, T. B., 1992	-26.87	26.67	IGNEOUS	VOLCANIC	BASALT	2700	0	54.19	0.98	15.07		12.62			0.14	5.01	7.34	3.87	0.67	0.126	2.17				17.47	3.986											222	69	69	169	97	65	100		276
99941	GEOROC	MCCUAIG, T. C.; KERRICH, R.; XIE, QIANLI, 1994	-32.2	121.77	IGNEOUS	VOLCANIC	THOLEIITE	2700	0	53.6	1.72	14.4	1.97		8.95		0.22	5	8.05	3.85	0.08	0.14	1.68	6.8	17.85	2.82	13.53	4.03	1.32	5.35	0.86	6.18	1.3	3.86	0.58	3.69	0.59	44	381	71					113		77	0.46
213797	GEOROC	MCCUAIG, T. C.; KERRICH, R.; XIE, QIANLI, 1994	-32.2	121.77	IGNEOUS	VOLCANIC	THOLEIITE	2700	0	52	1.03	14.2	12.5				0.29	6.22	10	3.09	0.2	0.09	0.77	2.89	7.94	1.3	7.33	2.39	0.85	3.2	0.53	4.09	0.86	2.67	0.41	2.68	0.42	44	307	278					54		42	0.16
380911	GEOROC	MCCUAIG, T. C.; KERRICH, R.; XIE, QIANLI, 1994	-32.2	121.77	IGNEOUS	VOLCANIC	THOLEIITE	2700	0	50.7	0.88	14.4	11.7				0.23	7.3	11.3	2.07	0.15	0.08	0.54	2.33	6.45	1.07	6.17	2.21	0.87	3.41	0.57	4.24	0.89	2.66	0.37	2.35	0.41	44	289	273		100			49		37	0.16
N22	GEOROC	NAQVI, S. M.; MANIKYAMBA, C.; GNANESHWAR RAO, T.; SUBBA RAO, D. V., 2002	15	76.6	IGNEOUS	VOLCANIC	THOLEIITE	2700	0	46.76	1.12	12.5	3.76		9.56		0.17	10.4	10.7	3.19	0.09	0.11	1.42	4.1	11.31	1.58	8.31	2.8	1.19	3.48	0.56	3.83	0.76	2.44	0.37	2.37	0.36	39	244	111	75	98	113	170	63	19	46	0.23	0.36
N23	GEOROC	NAQVI, S. M.; MANIKYAMBA, C.; GNANESHWAR RAO, T.; SUBBA RAO, D. V., 2002	15	76.6	IGNEOUS	VOLCANIC	THOLEIITE	2700	0	47.56	1.17	12.55	4.2		9.72		0.12	9.18	9.97	2.53	0.06	0.1	2	3.94	10.73	1.53	8.1	2.83	0.91	3.42	0.65	4.27	0.77	2.38	0.37	2.28	0.33	40	278	112	75	103	94	77	72	16	24	0.22	0.07
N25	GEOROC	NAQVI, S. M.; MANIKYAMBA, C.; GNANESHWAR RAO, T.; SUBBA RAO, D. V., 2002	15	76.6	IGNEOUS	VOLCANIC	THOLEIITE	2700	0	46.66	1.09	12.2	4.34		8.68		0.35	9.81	11.2	1.5	0.09	0.11	2.12	4.39	11.36	1.62	7.36	2.93	0.84	3.55	0.6	3.38	0.73	2.17	0.43	2.2	0.4	36	302	194	79	109	86	93	62	15	36	0.32	0.11
N26	GEOROC	NAQVI, S. M.; MANIKYAMBA, C.; GNANESHWAR RAO, T.; SUBBA RAO, D. V., 2002	15	76.6	IGNEOUS	VOLCANIC	THOLEIITE	2700	0	47.44	1.04	12.19	3.57		9.44		0.026	8.98	11.1	2.67	0.07	0.1	2.42	3.78	10.01	1.71	8.46	2.49	1.1	3.38	0.63	3.72	0.7	2.4	0.34	2.38	0.3	41	288	111	66	94	88	88	60	16	34	0.21	0.08
N27	GEOROC	NAQVI, S. M.; MANIKYAMBA, C.; GNANESHWAR RAO, T.; SUBBA RAO, D. V., 2002	15	76.6	IGNEOUS	VOLCANIC	THOLEIITE	2700	0	47.61	1.05	11.83	4.15		8.92		0.03	9.9	11.03	1.45	0.11	0.11	2.1	4.1	10.66	1.42	7.81	2.62	0.83	3.34	0.44	3.87	0.82	2.39	0.37	2.21	0.38	43	242	113	81	119	103	113	57	19	29	0.25	0.11
N30	GEOROC	NAQVI, S. M.; MANIKYAMBA, C.; GNANESHWAR RAO, T.; SUBBA RAO, D. V., 2002	15	76.6	IGNEOUS	VOLCANIC	THOLEIITE	2700	0	46.2	1.1	12.35	3.74		9.58		0.2	10.58	10.87	1.64	0.1	0.12	2.11	4.1	10.68	1.47	8.41	2.38	0.98	3.18	0.61	4.17	0.82	2.44	0.36	2.61	0.34	46	257	126	84	108	97	84	57	17	21	0.23	0.11
N31	GEOROC	NAQVI, S. M.; MANIKYAMBA, C.; GNANESHWAR RAO, T.; SUBBA RAO, D. V., 2002	15	76.6	IGNEOUS	VOLCANIC	THOLEIITE	2700	0	47.21	1.11	11.98	3.6		9.44		0.33	9.52	11.3	1.44	0.02	0.09	2.2	4.41	11.05	1.51	8.48	2.64	0.9	3.22	0.59	3.9	0.84	2.44	0.36	2.32	0.3	37	229	105	80	100	87	113	59	15	17	0.25	0.13
N32	GEOROC	NAQVI, S. M.; MANIKYAMBA, C.; GNANESHWAR RAO, T.; SUBBA RAO, D. V., 2002	15	76.6	IGNEOUS	VOLCANIC	THOLEIITE	2700	0	45.51	1.16	12.54	4.18		9.6		0.4	10.21	10.1	2.68	0.05	0.11	2.15	4.25	10.6	1.53	8.73	2.49	0.89	3.09	0.61	3.9	0.81	2.44	0.34	2.53	0.34	44	247	116	82	108	103	75	64	17	23	0.3	0.12
N35	GEOROC	NAQVI, S. M.; MANIKYAMBA, C.; GNANESHWAR RAO, T.; SUBBA RAO, D. V., 2002	15	76.6	IGNEOUS	VOLCANIC	THOLEIITE	2700	0	46.65	0.79	12.2	4.77		8		0.37	9.49	12.7	1.66	1.27	0.03	2.12	2.2	6.91	0.99	5.66	1.55	0.42	2.07	0.38	2.54	0.53	1.6	0.23	1.43	0.19	24	178	212	36	18	46	77	66	10	8	0.12	0.14
N40	GEOROC	NAQVI, S. M.; MANIKYAMBA, C.; GNANESHWAR RAO, T.; SUBBA RAO, D. V., 2002	15	76.6	IGNEOUS	VOLCANIC	BASALT	2700	0	46.74	0.83	12	5.56		7.72		0.2	12.36	9.34	1.85	0.2	0.02	2.32	3.69	9.75	1.42	6.52	1.86	0.81	2.87	0.48	3.22	0.66	1.92	0.21	1.97	0.27	32	219	267	57	23	80	139	32	15	27	0.16	0.16
N43	GEOROC	NAQVI, S. M.; MANIKYAMBA, C.; GNANESHWAR RAO, T.; SUBBA RAO, D. V., 2002	15	76.6	IGNEOUS	VOLCANIC	THOLEIITE	2700	0	48.12	1.01	12.3	5.68		8.4		0.22	8.86	9.75	2.97	0.17	0.08	1.9	4.02	11.91	1.67	8.04	2.69	0.94	3.29	0.59	3.98	0.84	2.53	0.36	2.53	0.32	37	273	192	60	22	78	90	65	17	34	0.18	0.25
RM186A	GEOROC	NAQVI, S. M.; MANIKYAMBA, C.; GNANESHWAR RAO, T.; SUBBA RAO, D. V., 2002	15	76.6	IGNEOUS	VOLCANIC	BASALT	2700	0	46.94	0.6	11.04	8.71		7.84		0.19	11.17	11.18	0.64	1.23	0.05	4.91	2.64	3.01	7.85	3.54	0.998	1.34	0.37	1.19	0.16	0.85	0.19	0.54	0.07	0.56	26.86	228	452	37.53	129	55.98	32.88	14.06	9.37	70.52	0.14
RM188	GEOROC	NAQVI, S. M.; MANIKYAMBA, C.; GNANESHWAR RAO, T.; SUBBA RAO, D. V., 2002	15	76.6	IGNEOUS	VOLCANIC	BASALT	2700	0	48.99	0.59	10.75	10.21		9.19		0.19	12.69	11.34	0.7	0.71	0.05	3.21	2.05	5.44	0.74	3.67	1.09	0.31	0.98	0.13	0.69	0.12	0.35	0.06	0.52	0.08	28.44	264	499	48.35	147	60.41	141.5	8.83	9.24	44.66	0.05
RM189	GEOROC	NAQVI, S. M.; MANIKYAMBA, C.; GNANESHWAR RAO, T.; SUBBA RAO, D. V., 2002	15	76.6	IGNEOUS	VOLCANIC	BASALT	2700	0	46.73	0.53	10.45	9.45		8.15		0.19	11.65	14.68	0.2	1.21	0.05	4.85	1.63	4.53	0.59	3.19	1.07	0.31	1.07	0.14	0.87	0.16	0.48	0.09	0.69	0.12	29.24	244	480	38.96	153	62.08	35.84	13.63	9.36	65.64	0.09
RM189B	GEOROC	NAQVI, S. M.; MANIKYAMBA, C.; GNANESHWAR RAO, T.; SUBBA RAO, D. V., 2002	15	76.6	IGNEOUS	VOLCANIC	BASALT	2700	0	50.46	0.58	10.37	10		9		0.19	11.27	11.61	0.11	1.2	0.05	4.8	1.7	4.43	0.6	0.73	2.29	0.29	0.95	0.13	0.73	0.13	0.39	0.06	0.51	0.09	27.85	227	447	36.43	127	51.9	27.15	12.33	9.62	90.28	0.12
RM192	GEOROC	NAQVI, S. M.; MANIKYAMBA, C.; GNANESHWAR RAO, T.; SUBBA RAO, D. V., 2002	15	76.6	IGNEOUS	VOLCANIC	BASALT	2700	0	51.09	0.61	11.14	8.92		8.03		0.19	13.37	9.58	1.99	0.14	0.05	2.9	2.63	6.91	0.93	4.77	1.55	0.59	2.05	0.34	2.32	0.51	1.52	0.22	1.63	0.24	31.64	268	535	35.6	143	66.74	30.59	11.96	10.75	89.03	0.11
RM202	GEOROC	NAQVI, S. M.; MANIKYAMBA, C.; GNANESHWAR RAO, T.; SUBBA RAO, D. V., 2002	15	76.6	IGNEOUS	VOLCANIC	BASALT	2700	0	48.24	0.6	11.36	10.25		9.23		0.22	12.4	11.21	1.89	0.52	0.05	3.01	2.57	7.12	0.94	1.41	4.23	0.6	2.1	0.35	2.53	0.49	1.52	0.23	1.77	0.27	38.89	321.7	634	47.47	176	67.97	26.79	9.9	11.9	107.2	0.18
RM205	GEOROC	NAQVI, S. M.; MANIKYAMBA, C.; GNANESHWAR RAO, T.; SUBBA RAO, D. V., 2002	15	76.6	IGNEOUS	VOLCANIC	BASALT	2700	0	49.84	0.59	11.87	8.99		8.09		0.21	12.49	11.69	1.39	0.11	0.06	2.81	1.17	3.09	0.42	0.6	1.82	0.27	0.99	0.17	1.19	0.25	0.75	0.12	0.85	0.13	23.41	597	2160	84.34	213	61.38	7.35	7.22	6.05	19.97	0.11
RM228	GEOROC	NAQVI, S. M.; MANIKYAMBA, C.; GNANESHWAR RAO, T.; SUBBA RAO, D. V., 2002	15	76.6	IGNEOUS	VOLCANIC	BASALT	2700	0	48.27	0.6	7.54	10.16		9.14		0.22	15.57	12.58	1.46	0.51	0.07	2.89	2.13	5.58	0.79	1.24	3.59	0.51	1.86	0.33	2.32	0.51	1.49	0.22	1.49	0.24	49.29	479	1323	45.36	154	84.12	12.03	6.09	9.75	34.31	0.08
RM233	GEOROC	NAQVI, S. M.; MANIKYAMBA, C.; GNANESHWAR RAO, T.; SUBBA RAO, D. V., 2002	15	76.6	IGNEOUS	VOLCANIC	BASALT	2700	0	48.52	0.62	12.04	9.66		8.7		0.17	13.08	11.71	1.56	0.1	0.06	2.5	2.35	6.14	0.81	4.2	1.39	0.52	1.89	0.32	1.97	0.43	1.37	0.2	1.49	0.22	33.38	294	612	4282	159	52.82	42.21	7.46	11.54	32.39	0.15
RM313	GEOROC	NAQVI, S. M.; MANIKYAMBA, C.; GNANESHWAR RAO, T.; SUBBA RAO, D. V., 2002	15	76.6	IGNEOUS	VOLCANIC	THOLEIITE	2700	0	48.67	0.97	13.01	15.41				0.22	6.55	10.03	2.38	0.26	0.11	2.11	2	14.36	1.8	8.72	2.79	0.96	3.61	0.57	4.21	0.78	2.51	0.37	2.69	0.41	30.1	237	214	49.78	124	90.85	28.89	61	16.48	63.01	0.19
GSWA100518	GEOROC	NELSON, D. R.; TRENDALL, A. F.; DE LAETER, J. R.; GROBLER, N. J.; FLETCHER, I. R., 1992	-21.45	120.1	IGNEOUS	VOLCANIC	ANDESITE	2700	0	55	0.91	13.6	1.57		7.06		0.13	3.65	5.67	3.25	0.56	0.14		22.8	42.4		19.41	4.15	2.21	4.31		3.79	0.86	2.37		1.98	0.31	19	187	79	54	112	101	65	175
GSWA100519	GEOROC	NELSON, D. R.; TRENDALL, A. F.; DE LAETER, J. R.; GROBLER, N. J.; FLETCHER, I. R., 1992	-25.87	24.73	IGNEOUS	VOLCANIC	BASALT	2700	0	52.8	1.19	13.1	4.3		6.41		0.15	4.4	5.88	4.11	1.3	0.24		24.3	51.4		26.79	5.57	1.86	5.32		4.03	0.87	2.23		1.56	0.23	16	168	34	65	192	128	147	217
GSWA100525	GEOROC	NELSON, D. R.; TRENDALL, A. F.; DE LAETER, J. R.; GROBLER, N. J.; FLETCHER, I. R., 1992	-25.87	24.73	IGNEOUS	VOLCANIC	ANDESITE	2700	0	53.6	1.39	14.5	1.64		6.57		0.12	3.58	5.99	3.82	2.36	0.62		63	128		61.09	11.17	3.24	10.1		8.09	1.72	4.37		3.63	0.52	18	184	151	40	87	123	39	354
GSWA100526	GEOROC	NELSON, D. R.; TRENDALL, A. F.; DE LAETER, J. R.; GROBLER, N. J.; FLETCHER, I. R., 1992	-25.87	24.73	IGNEOUS	VOLCANIC	ANDESITE	2700	0	54.6	1.57	13.7	2.2		6.74		0.16	5.15	6.12	3.35	0.83	0.72		69.5	142		64.17	11.85	3.5	11.5		9.17	1.87	4.86		3.8	0.58	22	197	140	39	102	129	39	351
GSWA100527	GEOROC	NELSON, D. R.; TRENDALL, A. F.; DE LAETER, J. R.; GROBLER, N. J.; FLETCHER, I. R., 1992	-25.87	24.73	IGNEOUS	VOLCANIC	BASALT	2700	0	50.2	0.4	10	1.24		8.07		0.2	13.2	8.5	0.93	1.03	0.05		5.9	11.4		6.7	1.66	0.63	2.02		1.94	0.5	1.35		1.2	0.2	26	156	1831	72	418	105	56	47
GSWA100528	GEOROC	NELSON, D. R.; TRENDALL, A. F.; DE LAETER, J. R.; GROBLER, N. J.; FLETCHER, I. R., 1992	-25.87	24.73	IGNEOUS	VOLCANIC	BASALT	2700	0	53.8	0.74	14.2	2.44		7.79		0.16	5.91	6.98	3.24	1.32	0.09		12.1	22.3		10.58	2.43	0.86	2.89		3.05	0.65	1.86		1.67	0.26	29	191	194	64	174	112	96	96				2
GSWA100529	GEOROC	NELSON, D. R.; TRENDALL, A. F.; DE LAETER, J. R.; GROBLER, N. J.; FLETCHER, I. R., 1992	-25.87	24.73	IGNEOUS	VOLCANIC	BASALT	2700	0	52.1	0.64	12.8	2.42		7.62		0.18	7.56	9.57	2.7	0.58	0.07		8.6	16.4		7.8	1.9	0.86	2.57		2.77	0.64	1.75		1.56	0.24	33	205	441	71	249	88	89	76
GSWA100530	GEOROC	NELSON, D. R.; TRENDALL, A. F.; DE LAETER, J. R.; GROBLER, N. J.; FLETCHER, I. R., 1992	-25.87	24.73	IGNEOUS	VOLCANIC	ANDESITE	2700	0	53.4	0.93	14.2	3.1		7.66		0.17	5.07	7.84	3.16	1.08	0.12		15	28.6		13.7	3.15	1.33	3.8		3.6	0.76	2.11		1.82	0.27	24	198	59	62	155	91	105	120
GSWA100531	GEOROC	NELSON, D. R.; TRENDALL, A. F.; DE LAETER, J. R.; GROBLER, N. J.; FLETCHER, I. R., 1992	-25.87	24.73	IGNEOUS	VOLCANIC	ANDESITE	2700	0	54.1	1	14.3	2.45		8.28		0.15	4.6	6.92	3.15	1.97	0.12		14	27.5		13.79	3.24	1.18	3.89		3.65	0.76	2.12		1.78	0.26	24	210	49	71	173	98	122	120
GSWA100532	GEOROC	NELSON, D. R.; TRENDALL, A. F.; DE LAETER, J. R.; GROBLER, N. J.; FLETCHER, I. R., 1992	-25.87	24.73	IGNEOUS	VOLCANIC	ANDESITE	2700	0	53.7	1.05	14.5	2.83		7.05		0.14	4.73	7.63	2.77	1.74	0.15		17.5	33.9		16.03	3.56	1.46	4.12		3.7	0.74	2.02		1.73	0.25	20	170	61	61	169	90	113	141
93-15	GEOROC	POLAT, A., 2009	49	-85.5	IGNEOUS	VOLCANIC	BASALT	2700	0	47.6	2.8	13		17.7			0.2	6	8.9	2.5	0.7	0.4	0.15	9.6	27.4	3.9	18	5.1	2.5	5.5	0.9	5.9	1.3	3.5	0.5	3.1	0.5	39	428	28	26	33	112	25	125		131	0.3	0.3
93-17	GEOROC	POLAT, A., 2009	49	-85.5	IGNEOUS	VOLCANIC	BASALT	2700	0	48.2	2.5	14.1		16.7			0.3	6.8	9.3	1.2	0.4	0.4	0.05	11.8	31.2	4.5	20.8	5.3	2.1	5.6	0.9	5.3	1.1	3.1	0.4	2.9	0.4	36	363	103	51	58	214	63	148		42	0.4	0.2
BD-16-1	GEOROC	POLAT, A., 2009	48.8	-87	IGNEOUS	VOLCANIC	BASALT	2700	0	51.6	1.3	14.2		15.2			0.2	6.6	7.8	2.8	0.2	0.13	0.3	7.8	21.3	3.1	15.3	4.9	1.5	6.2	1	7	1.6	4.6	0.7	4.5	0.7	43	327	21	64	52	175	143	138		16	0.4	0.7
BD-18-1	GEOROC	POLAT, A., 2009	48.8	-87	IGNEOUS	VOLCANIC	BASALT	2700	0	52.4	1.6	13.2		16.8			0.2	4.7	7.5	2.6	0.6	0.26	0.5	10.9	29.1	4.4	22.03	6.58	1.8	7.9	1.3	8.5	1.8	5.4	0.8	5.4	0.8	42	298	24	96	35	129	162	158		26	0.6	0.5
BD-18-2	GEOROC	POLAT, A., 2009	48.8	-87	IGNEOUS	VOLCANIC	BASALT	2700	0	52	1	14.3		13.4			0.2	6.8	9	3	0.2	0.09	0.6	5.6	14.8	2.3	11.4	3.2	1.1	4.6	0.8	5.4	1.1	3.4	0.5	3.1	0.5	45	306	32	63	58	103	180	94		15	0.3	0.4
BD-26-1	GEOROC	POLAT, A., 2009	48.8	-87	IGNEOUS	VOLCANIC	BASALT	2700	0	52	1	14.3		13.4			0.2	6.8	9	3	0.2	0.09	0.6	5.6	14.8	2.3	11.4	3.2	1.1	4.6	0.8	5.4	1.1	3.4	0.5	3.1	0.5	45	306	32	63	58	103	180	94		15	0.3	0.4
BD-28-1	GEOROC	POLAT, A., 2009	48.8	-87	IGNEOUS	VOLCANIC	BASALT	2700	0	51.1	1.2	13.8		15.4			0.2	6	9.3	2.3	0.5	0.1	1.6	4.5	14.4	2.4	11.9	3.2	1	4.3	0.7	4.9	1	3.1	0.5	3.2	0.5	40	314	171	104	103	107	206	89		70	0.3	0.6
BD-28-2	GEOROC	POLAT, A., 2009	48.8	-87	IGNEOUS	VOLCANIC	BASALT	2700	0	50	1.3	14.6		16.3			0.2	6.8	7.7	2.7	0.1	0.12	0.2	8.6	21.7	3.3	16.16	4.97	1.5	6.4	1.1	7.1	1.6	4.4	0.6	4.4	0.7	43	318	21	64	44	124	259	129		19	0.4	0.5
BD-32-1	GEOROC	POLAT, A., 2009	48.8	-87	IGNEOUS	VOLCANIC	BASALT	2700	0	51.3	1.3	13.9		16			0.2	6.3	8.6	1.9	0.3	0.13	0.9	7.8	21	3.2	15.7	4.4	1.5	6.1	1.1	7.2	1.5	4.6	0.6	4.3	0.6	44	344	31	89	46	141	226	139		42	0.4	0.5
BD-37-1	GEOROC	POLAT, A., 2009	48.8	-87	IGNEOUS	VOLCANIC	BASALT	2700	0	51.3	0.9	14.3		12.8			0.2	7.3	9.8	3.1	0.1	0.08	0.4	4.8	12.9	2	9.7	2.7	0.9	3.9	0.6	4.4	0.9	2.7	0.4	2.6	0.4	41	281	271	51	79	94	116	85		14	0.3	0.4
BD-46-1	GEOROC	POLAT, A., 2009	48.8	-87	IGNEOUS	VOLCANIC	BASALT	2700	0	50.8	1.1	14.5		14.7			0.2	6.8	9	2.3	0.5	0.1	1.6	6.8	18.3	2.6	12.9	4	1.2	5.1	0.9	6	1.3	3.7	0.6	3.7	0.6	44	279	17	42	53	109	95	106		60	0.3	0.4
BD-48-1	GEOROC	POLAT, A., 2009	48.8	-87	IGNEOUS	VOLCANIC	BASALT	2700	0	50.8	0.8	14.8		10.8			0.1	8.6	11.3	1.9	0.8	0.06	0.9	3.7	9.8	1.6	7.8	2.4	0.8	3.5	0.6	3.9	0.8	2.4	0.3	2.4	0.4	40	238	600	37	69	38	125	33		57	0.2	0.4
BD-62-1	GEOROC	POLAT, A., 2009	48.8	-87	IGNEOUS	VOLCANIC	BASALT	2700	0	54.1	1.2	12.9		14.5			0.2	5.6	8.1	2.8	0.4	0.11	0.5	7.3	20	2.9	14.1	4.4	1.4	5.7	1	6.5	1.4	4.2	0.6	4	0.7	39	292	17	49	47	106	84	134		53	0.4	0.4
BD-7-1	GEOROC	POLAT, A., 2009	48.8	-87	IGNEOUS	VOLCANIC	BASALT	2700	0	53.8	1.3	13		14.6			0.2	5.9	8.3	2.5	0.3	0.12	0.4	7.9	21.2	3.1	15.1	4.5	1.4	5.7	1	6.6	1.5	4.3	0.7	4.3	0.7	39	306	21	58	47	83	135	130		18	0.4	0.5
SC95-16	GEOROC	POLAT, A., 2009	48.8	-87.27	IGNEOUS	VOLCANIC	BASALT	2700	0	52.9	1.5	13.9		15			0.2	4.9	7.7	3	0.7	0.1	1.57	7.5	19.1	2.7	14.01	3.9	1.3	4.5	0.7	4.4	0.9	2.4	0.4	2.2	0.3	39	343	485	74	116	123	109	100		167	0.3	0.2
SC95-19	GEOROC	POLAT, A., 2009	48.8	-87.27	IGNEOUS	VOLCANIC	BASALT	2700	0	54.2	1.3	11.6		16.8			0.4	4	8.5	2.8	0.5	0.1	2.88	5.8	15.7	2.4	11.9	3.1	1.1	3.6	0.6	3.6	0.7	2.2	0.3	2	0.3	27	217	408	96	480	118	85	77		146	0.3	0.1
SC95-33	GEOROC	POLAT, A., 2009	48.8	-87.27	IGNEOUS	VOLCANIC	BASALT	2700	0	46.3	2.4	17		17.1			0.4	3.3	10.1	2.7	0.4	0.4	0.35	11.1	31.1	4.4	21.34	5.5	2	6	0.9	5.8	1.2	3.2	0.5	3.1	0.5	32	433	211	68	149	141	100	169		96	0.5	0.2
SC95-86	GEOROC	POLAT, A., 2009	48.8	-87.27	IGNEOUS	VOLCANIC	BASALT	2700	0	50	2.2	13.5		15.5			0.3	4.9	9.6	3.2	0.4	0.4	0.96	12.3	35	5	22.74	5.7	2	6.1	1	5.9	1.2	3.3	0.5	3.2	0.5	37	350	108	47	83	148	37	176		50	0.6	0.2
WL-43-1	GEOROC	POLAT, A., 2009	48.8	-87	IGNEOUS	VOLCANIC	BASALT	2700	0	51.9	1.4	14.6		14			0.1	5	11.6	1	0.3	0.15	1.4	8.1	20.3	2.9	13.6	4	1.4	4.9	0.9	5.7	1.2	3.6	0.6	3.6	0.5	38	376	94	45	55	51	46	93		29	0.3	0.2
WL95-5	GEOROC	POLAT, A., 2009	48.8	-87	IGNEOUS	VOLCANIC	BASALT	2700	0	46	2.3	13.3		17.4			0.2	9.4	8.1	2.1	0.6	0.41	0.8	9.3	28.5	4.3	21.7	5.6	2	6.2	0.9	5.4	1.1	3.2	0.4	2.8	0.4	26	231	341	66	338	150	74	157		84	0.5	0.3
HB95-31	GEOROC	POLAT, A.; KERRICH, R., 2000	48.65	-86.28	IGNEOUS	VOLCANIC	BASALT	2700	0	46.4	1.07	16.6		16.4			0.22	5.5	11.2	2.1	0.5	0.1	1.2	7.2	18.3	2.46	11.1	3.06	1.061	3.46	0.548	3.51	0.78	2.12	0.351	2.16	0.348	50	344	362	52	37			69		207	0.18	0.144
HE7	GEOROC	POLAT, A.; KERRICH, R., 2000	48.6	-87.85	IGNEOUS	VOLCANIC	BASALT	2700	0	52.5	0.67	17		9.8			0.25	5.2	10.9	3.1	0.6	0.1	0.8	10.2	24.5	3.08	13.2	3.2	1.02	3.5	0.52	3.55	0.73	2.24	0.32	1.92	0.3	40	237	237		44			71		250	0.19	0.17
WL-6-2	GEOROC	POLAT, A.; KERRICH, R., 2000	48.8	-87	IGNEOUS	VOLCANIC	BASALT	2700	0	53.6	1.38	15		11.7			0.16	5.3	8.8	3.3	0.5	0.3	0.5	16.4	41.5	5.55	24.1	4.75	1.488	4.18	0.543	3.34	0.65	1.84	0.281	1.71	0.261	30	323	102	36	49			110		64	0.4	0.472
HB95-15	GEOROC	POLAT, A.; KERRICH, R., 2001	48.65	-86.28	IGNEOUS	VOLCANIC	BASALT	2700	0	54	0.62	15.7		9.4			0.2	4	11.8	3.5	0.6	0.22	3.7	24.2	55.7	6.74	27.4	5.33	1.473	4.31	0.519	3	0.6	1.65	0.239	1.41	0.218	24.4	187	117	36	64			102		155	0.17	0.643
HB95-31	GEOROC	POLAT, A.; KERRICH, R., 2001	48.65	-86.28	IGNEOUS	VOLCANIC	BASALT	2700	0	46.4	1.07	16.6		16.4			0.22	5.5	11.2	2.1	0.5	0.1	1.2	7.2	18.3	2.46	11.1	3.06	1.061	3.46	0.548	3.51	0.78	2.12	0.351	2.16	0.348	50.2	344	362	52	37			69		207	0.18	0.144
HE7	GEOROC	POLAT, A.; KERRICH, R., 2001	48.6	-87.85	IGNEOUS	VOLCANIC	BASALT	2700	0	52.31	0.99	16.9		9.72			0.25	5.22	10.83	3.06	0.6	0.13	0.75	10.2	24.5	3.08	13.21	3.2	1.02	3.5	0.52	3.55	0.73	2.24	0.32	1.92	0.3	40	237	237		44			71		250	0.19	0.17
SC95-24	GEOROC	POLAT, A.; KERRICH, R., 2001	48.8	-87.27	IGNEOUS	VOLCANIC	BASALT	2700	0	53.9	1.53	15.3		12.4			0.2	3.6	9.4	2.8	0.7	0.2	1.3	8.9	20.9	2.94	12.3	2.97	1.144	3.45	0.516	3.26	0.64	1.94	0.304	1.9	0.294	20.5	200	63	33	52			121		131	0.25	0.223
SC95-87	GEOROC	POLAT, A.; KERRICH, R., 2001	48.8	-87.27	IGNEOUS	VOLCANIC	BASALT	2700	0	50.6	2.24	14.7		16.2			0.22	5.3	7.2	2	1.3	0.27	5.2	11.9	31.6	4.16	19.3	4.8	1.494	5.18	0.8	5.08	1.07	2.95	0.431	2.6	0.379	37	386	22	36	24			134		297	0.45	0.326
WL-39-3	GEOROC	POLAT, A.; KERRICH, R., 2001	48.8	-87	IGNEOUS	VOLCANIC	BASALT	2700	0	53.7	2.18	14.2		13.9			0.12	4.2	7.7	2.9	0.5	0.52	0.6	37.2	93.8	12.3	51.6	8.6	2.4	7	0.9	5.6	1.2	3.3	0.5	3.24	0.5	32.5	318	14	43	15			138		122	0.5	0.6
WL-6-2	GEOROC	POLAT, A.; KERRICH, R., 2001	48.8	-87	IGNEOUS	VOLCANIC	BASALT	2700	0	53.6	1.38	15		11.7			0.16	5.3	8.8	3.3	0.5	0.27	0.5	16.4	41.5	5.55	24.1	4.75	1.488	4.18	0.543	3.34	0.65	1.84	0.281	1.71	0.261	29.6	323	102	50	49			110		64	0.4	0.472
WR95-1	GEOROC	POLAT, A.; KERRICH, R., 2001	48.5	-85.5	IGNEOUS	VOLCANIC	BASALT	2700	0	50.5	1.42	13.1		16.6			0.24	5.3	9.5	2.4	0.8	0.14	0.9	12.8	30	3.76	16.2	4.3	1.407	5.16	0.886	5.76	1.22	3.46	0.535	3.47	0.515	44.6	306	217	41	32			116		243	0.49	0.501
HB95-15	GEOROC	POLAT, A.; KERRICH, R.; WYMAN, D. A., 1998	48.65	-86.28	IGNEOUS	VOLCANIC	BASALT	2700	0	54	0.6	15.7		9.4			0.2	4	11.8	3.5	0.6	0.2	3.7	23.3	53.7	6.5	26.4	5.1	1.4	4.2	0.5	2.9	0.6	1.6	0.2	1.4	0.21	24	180	113	35	61			99		150	0.2	0.62
SC95-24	GEOROC	POLAT, A.; KERRICH, R.; WYMAN, D. A., 1998	48.8	-87.27	IGNEOUS	VOLCANIC	BASALT	2700	0	52.8	1.5	15		12.1			0.2	3.5	9.2	2.7	0.7	0.2	1.2	8.9	20.9	2.9	12.1	2.9	1.1	3.4	0.5	3.2	0.6	1.9	0.3	1.9	0.29	20	200	63	33	52			121		131	0.3	0.22
SC95-87	GEOROC	POLAT, A.; KERRICH, R.; WYMAN, D. A., 1998	48.8	-87.27	IGNEOUS	VOLCANIC	BASALT	2700	0	47.8	2.1	13.9		15.3			0.2	5.1	6.8	1.9	1.2	0.3	5	11.3	30.1	4	18.3	4.6	1.4	4.9	0.8	4.8	1	2.8	0.4	2.5	0.36	35	366	21	40	22			127		282	0.4	0.31
WR95-1	GEOROC	POLAT, A.; KERRICH, R.; WYMAN, D. A., 1998	48.5	-85.5	IGNEOUS	VOLCANIC	BASALT	2700	0	49.5	1.4	12.8		16.3			0.2	5.2	9.4	2.3	0.8	0.1	0.9	12.7	29.7	3.7	16.1	4.3	1.4	5.1	0.9	5.7	1.2	3.4	0.5	3.4	0.51	44	303	215	42	32			115		241	0.5	0.5
SC2007-04	GEOROC	POLAT, A.; LONGSTAFFE, F. J.; WEISENER, C.; FRYER, B. J.; FREI, R.; KERRICH, R., 2012	48.7964	-87.3053	IGNEOUS	VOLCANIC	BASALT	2700	0	48.77	0.26	9		26.59			0.13	3.73	3.73	0.01	0.06	0.1	6.8	22	51.95	7.4	33.91	8.59	2.63	10.48	1.95	14.77	3.35	9.54	1.23	6.7	0.92	26	651	82	55	95	103	8	29	21.7	31	0.06	0.14
SC2007-20	GEOROC	POLAT, A.; LONGSTAFFE, F. J.; WEISENER, C.; FRYER, B. J.; FREI, R.; KERRICH, R., 2012	48.7947	-87.2948	IGNEOUS	VOLCANIC	BASALT	2700	0	47.9	1.11	13.4		12			0.29	3.06	10.5	2.55	0.22	0.09	8.9	3.5	8.95	1.43	7.18	2.36	0.7	3.15	0.56	3.82	0.82	2.49	0.37	2.44	0.38	43	310	168	52	107	111	112	70	16.5	108	0.18	0.08
SC2007-20	GEOROC	POLAT, A.; LONGSTAFFE, F. J.; WEISENER, C.; FRYER, B. J.; FREI, R.; KERRICH, R., 2012	48.7947	-87.2948	IGNEOUS	VOLCANIC	BASALT	2700	0	47.8	1.11	13.3		12.1			0.29	3.07	10.5	2.55	0.23	0.08	8.9
SC2007-29	GEOROC	POLAT, A.; LONGSTAFFE, F. J.; WEISENER, C.; FRYER, B. J.; FREI, R.; KERRICH, R., 2012	48.7946	-87.2929	IGNEOUS	VOLCANIC	BASALT	2700	0	50.6	1.32	15.2		13.1			0.29	3.4	8.2	2.59	0.42	0.156	3.9	4.43	11.65	1.82	9.22	2.94	1.06	3.91	0.68	4.58	0.98	2.87	0.42	2.75	0.41	49	357	189	50	121	104	116	78	18.5	103	0.2	0.1
SC2007-30	GEOROC	POLAT, A.; LONGSTAFFE, F. J.; WEISENER, C.; FRYER, B. J.; FREI, R.; KERRICH, R., 2012	48.7947	-87.2932	IGNEOUS	VOLCANIC	BASALT	2700	0	46.9	1.15	13.7		16.2			0.39	3.7	10.5	1.94	0.16	0.126	4.7	4.06	10.29	1.59	8.22	2.64	0.89	3.52	0.62	4.12	0.89	2.73	0.4	2.6	0.4	44	317	167	47	83	100	110	69	15.9	60	0.18	0.09
SC2007-31	GEOROC	POLAT, A.; LONGSTAFFE, F. J.; WEISENER, C.; FRYER, B. J.; FREI, R.; KERRICH, R., 2012	48.7947	-87.2941	IGNEOUS	VOLCANIC	BASALT	2700	0	47.4	1.16	13.6		15.5			0.36	4	9.1	2.04	0.65	0.126	4.7	4.47	11.53	1.81	9.41	3.02	1.15	3.79	0.68	4.58	0.97	2.93	0.43	2.91	0.44	44	307	160	60	115	125	120	70	16.4	184	0.19	0.1
SC2007-33	GEOROC	POLAT, A.; LONGSTAFFE, F. J.; WEISENER, C.; FRYER, B. J.; FREI, R.; KERRICH, R., 2012	48.7947	-87.2948	IGNEOUS	VOLCANIC	BASALT	2700	0	53.2	1.39	14		12.5			0.26	3.7	7.7	2.22	0.31	0.186	3.2	4.44	11.71	1.83	9.61	3.13	1.36	4.08	0.71	4.82	1.04	3.04	0.46	2.94	0.45	46	351	155	57	99	123	127	88	18.2	114	0.23	0.11
SC2008-14	GEOROC	POLAT, A.; LONGSTAFFE, F. J.; WEISENER, C.; FRYER, B. J.; FREI, R.; KERRICH, R., 2012	48.7949	-87.2951	IGNEOUS	VOLCANIC	BASALT	2700	0	47.4	1.27	14.8		13.8			0.33	4.2	10.1	2.65	0.28	0.125	4.4	4.28	11.49	1.83	9.39	3.09	1.14	4.08	0.7	4.8	1.03	3.06	0.46	2.97	0.46	50	345	180	62	116	136	125	75	17.8	88	0.2	0.09
SC2008-15	GEOROC	POLAT, A.; LONGSTAFFE, F. J.; WEISENER, C.; FRYER, B. J.; FREI, R.; KERRICH, R., 2012	48.7949	-87.295	IGNEOUS	VOLCANIC	BASALT	2700	0	50.7	1.26	14.6		12.1			0.3	3.3	8.9	2.98	0.3	0.125	3.9	3.98	10.71	1.72	8.77	2.85	1.01	3.82	0.65	4.53	0.96	2.88	0.43	2.84	0.44	48	335	174	53	109	117	98	75	17.6	85	0.2	0.09
SC2008-20	GEOROC	POLAT, A.; LONGSTAFFE, F. J.; WEISENER, C.; FRYER, B. J.; FREI, R.; KERRICH, R., 2012	48.7965	-87.3062	IGNEOUS	VOLCANIC	BASALT	2700	0	51.5	1.28	12.6		21.2			0.06	3.6	1.4	0.18	2.25	0.27	5.1	7.98	23.09	3.39	17.82	5.96	2.17	8.52	1.62	11.74	2.5	7.5	1.03	6.32	0.91	35	300	289	37	125	96	2547	165	17	204	0.3	0.37
SC2008-22	GEOROC	POLAT, A.; LONGSTAFFE, F. J.; WEISENER, C.; FRYER, B. J.; FREI, R.; KERRICH, R., 2012	48.7966	-87.3059	IGNEOUS	VOLCANIC	BASALT	2700	0	50.4	0.97	12.5		25.5			0.06	4.5	0.27	0.09	0.66	0.16	5.5	4.54	11.03	1.7	8.68	2.61	0.88	3.45	0.56	3.65	0.75	2.23	0.32	2.01	0.32	40	200	153	39	130	119	12	59	19.6	26	0.16	0.17
K129	GEOROC	RAVIKANT, V., 2009	14.2	79.68	IGNEOUS	VOLCANIC	BASALT	2700	0	50.6	1.48	15.31	4.25		7.92		0.19	6.02	9.4	2.44	0.34	0.13	0.77	13	27	3.6	15.5	3.98	1.2	4.2	0.68	3.6	0.73	1.7	0.27	1	0.27	26	256	145	54	18			31		37	0.82	0.44
K176	GEOROC	RAVIKANT, V., 2009	14.2	79.68	IGNEOUS	VOLCANIC	BASALT	2700	0	50.3	1.31	13.74	6.2		6.84		0.26	7.84	7.28	3.69	0.19	0.12	1.16	5.65	18.8	1.98	9.41	3.33	1.4	4.19	0.76	4.42	1.04	2.68	0.47	1.9	0.43	46.4	327	231	67.5	17.9			30.7		65.6	0.58	0.17
K35A	GEOROC	RAVIKANT, V., 2009	14.2	79.68	IGNEOUS	VOLCANIC	BASALT	2700	0	48.2	1.97	14.41	6.73		7.92		0.18	9.12	6.42	3	0.22	0.22	0.43				20	5.49
K35C	GEOROC	RAVIKANT, V., 2009	14.2	79.68	IGNEOUS	VOLCANIC	BASALT	2700	0	50.2	1.66	13.04	6.18		7.38		0.18	11.07	4.87	3.13	0.2	0.21	0.82				18.1	4.9
K35D	GEOROC	RAVIKANT, V., 2009	14.2	79.68	IGNEOUS	VOLCANIC	BASALT	2700	0	48.8	1.57	14.61	5.77		8.1		0.18	8.98	7.18	3.33	0.14	0.22	0.31				19.8	5.07
K35E	GEOROC	RAVIKANT, V., 2009	14.2	79.68	IGNEOUS	VOLCANIC	BASALT	2700	0	51	1.84	12.56	6.29		7.92		0.19	8.79	6.28	2.9	0.22	0.21	0.73				19.9	5.41
K35F	GEOROC	RAVIKANT, V., 2009	14.2	79.68	IGNEOUS	VOLCANIC	BASALT	2700	0	49.5	1.49	13.87	6.1		8.46		0.17	8.08	7.04	2.9	0.18	0.21	0.8	14	29	4	18.8	4.83	1.5	4.8	0.79	4.2	1.1	2.4	0.39	1.5	0.39	38	301	160	93	23			11		18	4	0.15
K35G	GEOROC	RAVIKANT, V., 2009	14.2	79.68	IGNEOUS	VOLCANIC	BASALT	2700	0	48.9	1.83	15.29	5.62		7.56		0.19	9.58	6.04	2.88	0.15	0.23	0.63				21	5.47
K99-2	GEOROC	RAVIKANT, V., 2009	14.2	79.68	IGNEOUS	VOLCANIC	BASALT	2700	0	50	1.11	13.92	6.74		7.56		0.29	7.29	7.59	2.57	0.22	0.11	1.52	4.66	10.5	1.35	5.95	2.38	0.99	3.46	0.7	4.22	1.01	2.63	0.47	1.8	0.44	39.2	268	106	79.2	16			65		34.2	0.51	0.24
BD108-7	GEOROC	SAID, N.; KERRICH, R., 2009	-31.2	121.67	IGNEOUS	VOLCANIC	BASALT	2700	20	49.1	0.85	14.26	1.96	12.1	9.12		0.17	8.14	10.65	2.08	0.3	0.07	3.15	2.9	8.28	1.28	6.11	2.01	0.74	2.73	0.47	3.26	0.71	2.11	0.3	2	0.31	43	299	332	70	143	123	112	50		86.9
BD222-2	GEOROC	SAID, N.; KERRICH, R., 2009	-31.2	121.67	IGNEOUS	VOLCANIC	BASALT	2700	20	51.03	0.83	14.86	1.32	12.65	10.2		0.2	8.31	6.36	3.6	0.28	0.07	2.81	1.94	5.51	0.86	4.43	1.65	0.59	2.5	0.48	3.42	0.72	2.08	0.33	2.09	0.3	47	304	315	60	73	95	71	48		51.9
CD339W3-1	GEOROC	SAID, N.; KERRICH, R., 2009	-31.2	121.67	IGNEOUS	VOLCANIC	BASALT	2700	20	47.87	0.63	13.01	0.98	10.03	8.15		0.15	6.16	8.68	1.59	0.4	0.06	12.07	9.57	19.58	2.28	9.23	2.12	0.68	2.5	0.4	2.54	0.52	1.42	0.23	1.44	0.22	37	216	269	50	85	168	48	66		43.5
CD339W3-2	GEOROC	SAID, N.; KERRICH, R., 2009	-31.2	121.67	IGNEOUS	VOLCANIC	BASALT	2700	20	48.88	0.64	13.08	1.46	10.37	8.02		0.15	6.25	8.83	1.96	0.24	0.07	10.11	10.17	20.7	2.38	9.74	2.26	0.74	2.59	0.42	2.82	0.59	1.6	0.25	1.58	0.25	38	219	246	49	85	82	84	68		20
CD339W3-3	GEOROC	SAID, N.; KERRICH, R., 2009	-31.2	121.67	IGNEOUS	VOLCANIC	BASALT	2700	20	48.73	0.65	12.89	0.86	9.38	7.66		0.13	6.14	8.8	2.35	0.25	0.07	11.4	7.22	16.64	2.12	9.2	2.24	0.66	2.64	0.45	2.84	0.6	1.67	0.26	1.7	0.26	34	221	158	48	80	48	6	67		132.1
CD339W3-4	GEOROC	SAID, N.; KERRICH, R., 2009	-31.2	121.67	IGNEOUS	VOLCANIC	BASALT	2700	20	50.57	0.7	13.6	2.36	11.01	7.78		0.16	5.94	8.36	2.92	0.14	0.07	7.18	11.17	22.47	2.63	10.53	2.43	0.76	2.86	0.45	2.93	0.67	1.86	0.28	1.95	0.28	30	211	120	53	74	70	56	74		74.6
CD339W3-6	GEOROC	SAID, N.; KERRICH, R., 2009	-31.2	121.67	IGNEOUS	VOLCANIC	BASALT	2700	20	51.48	0.41	8.41	1.77	11.17	8.45		0.18	16.98	6.52	1.11	0.13	0.04	4.13	5.87	11.99	1.37	5.68	1.31	0.38	1.52	0.25	1.69	0.37	1.03	0.16	1.07	0.18	33	162	1852	72	337	75	45	39		23.2
CD339W3-7	GEOROC	SAID, N.; KERRICH, R., 2009	-31.2	121.67	IGNEOUS	VOLCANIC	BASALT	2700	20	50.46	0.43	8.68	1.69	11.36	8.7		0.19	16.55	6.78	0.41	0.8	0.04	4.91	4.81	10.15	1.22	5.09	1.24	0.39	1.53	0.26	1.75	0.37	1.01	0.16	1.05	0.17	26	151	1811	78	391	94	40	40		191.2
KD330-1	GEOROC	SAID, N.; KERRICH, R., 2009	-31.2	121.67	IGNEOUS	VOLCANIC	BASALT	2700	20	51.22	0.61	12.56	1.62	11.16	8.58		0.16	9.78	7.53	1.89	0.32	0.06	5.2	8.4	17.7	2.06	8.48	1.97	0.65	2.31	0.4	2.5	0.54	1.54	0.24	1.57	0.23	36	210	803	62	186	81	87	63		123.3
KD330-4	GEOROC	SAID, N.; KERRICH, R., 2009	-31.2	121.67	IGNEOUS	VOLCANIC	BASALT	2700	20	51.88	0.6	12.5	2.27	11	7.86		0.17	10.47	7.87	2.71	0.68	0.06	2.48	6.52	15.04	1.83	7.69	1.92	0.66	2.31	0.39	2.64	0.57	1.58	0.25	1.62	0.25	35	209	870	64	209	87	76	63		179.7
RHD1-1	GEOROC	SAID, N.; KERRICH, R., 2009	-31.2	121.67	IGNEOUS	VOLCANIC	BASALT	2700	20	50.65	0.87	15.06	1.89	11	8.19		0.14	8.4	9.1	1.87	0.07	0.08	3.56	2.44	6.67	1.03	5.4	1.71	0.68	2.36	0.42	2.8	0.59	1.61	0.24	1.56	0.21	33	242	279	54	166	94	64	52		14.7
RHD1-2	GEOROC	SAID, N.; KERRICH, R., 2009	-31.2	121.67	IGNEOUS	VOLCANIC	BASALT	2700	20	48.63	1.01	14.94	1.54	11.59	9.05		0.15	8.63	8.73	2.08	0.11	0.09	4.91	3.08	8.25	1.28	6.13	1.96	0.83	2.69	0.45	3.1	0.67	2.01	0.29	2.01	0.31	39	282	289	55	107	85	71	60		25.5
SE10-3	GEOROC	SAID, N.; KERRICH, R., 2009	-31.2	121.67	IGNEOUS	VOLCANIC	BASALT	2700	20	49.96	0.51	10.72	1.28	11.27	8.99		0.18	12.69	8.81	0.61	1	0.06	4.88	7.36	14.96	1.7	7.23	1.62	0.72	2.01	0.33	2.21	0.45	1.21	0.18	1.04	0.15	28	179	1194	63	335	85	53	52		339.5
SE10-5	GEOROC	SAID, N.; KERRICH, R., 2009	-31.2	121.67	IGNEOUS	VOLCANIC	BASALT	2700	20	50.4	0.62	11.95	2.04	11.7	8.69		0.18	11.61	8.51	1.51	0.27	0.07	3.87	9.63	18.98	2.21	9.07	1.98	0.62	2.34	0.39	2.53	0.53	1.42	0.22	1.36	0.18	31	196	942	62	251	86	31	63		85
SE10-6	GEOROC	SAID, N.; KERRICH, R., 2009	-31.2	121.67	IGNEOUS	VOLCANIC	BASALT	2700	20	52	0.59	11.65	1.96	10.3	7.51		0.16	10.19	9.59	1.67	0.29	0.06	4.02	8.43	17.78	2	8.13	1.91	0.75	2.27	0.38	2.56	0.51	1.45	0.22	1.37	0.19	32	189	914	62	239	78	65	60		98.1
SE13-10	GEOROC	SAID, N.; KERRICH, R., 2009	-31.2	121.67	IGNEOUS	VOLCANIC	BASALT	2700	20	52.26	0.68	13.89	2.59	10.86	7.44		0.17	7.05	9.7	2.74	0.17	0.07	3.06	9.68	19.95	2.34	9.59	2.25	0.77	2.6	0.44	2.82	0.6	1.67	0.27	1.74	0.27	38	215	295	58	99	77	42	72		65.6
SE13-22D	GEOROC	SAID, N.; KERRICH, R., 2009	-31.2	121.67	IGNEOUS	VOLCANIC	BASALT	2700	20	52.14	0.49	9.85	0.91	11.03	9.11		0.19	13.64	7.32	0.93	0.62	0.05	4.47	7.06	14.13	1.63	6.77	1.55	0.49	1.84	0.32	2.03	0.43	1.22	0.19	1.28	0.21	38	231	1135	46	196	110	24	50		158.1
SE13-3	GEOROC	SAID, N.; KERRICH, R., 2009	-31.2	121.67	IGNEOUS	VOLCANIC	BASALT	2700	20	52.5	0.69	14.05	2.8	10.95	7.33		0.17	7.19	9.4	2.21	0.48	0.07	2.87	9.88	20.37	2.4	9.95	2.3	0.78	2.71	0.44	3.01	0.63	1.8	0.27	1.88	0.29	36	214	439	59	124	110	51	69		147.8
SE13-4	GEOROC	SAID, N.; KERRICH, R., 2009	-31.2	121.67	IGNEOUS	VOLCANIC	BASALT	2700	20	52.28	0.65	13.25	2.29	10.88	7.73		0.17	7.95	9.73	1.66	0.69	0.07	3.28	9.96	20.63	2.32	9.69	2.24	0.7	2.62	0.43	2.89	0.62	1.7	0.27	1.81	0.28	35	217	285	58	98	88	82	72		222.1
SE2-3B	GEOROC	SAID, N.; KERRICH, R., 2009	-31.2	121.67	IGNEOUS	VOLCANIC	BASALT	2700	20	51.83	0.72	13.71	3.62	10.94	6.59		0.17	5.99	11.46	1.17	0.18	0.08	4.29	11.08	22.43	2.62	10.65	2.43	0.78	2.79	0.48	3.1	0.65	1.82	0.29	1.91	0.29	35	211	175	56	73	82	55	77		96.8
SE2-6	GEOROC	SAID, N.; KERRICH, R., 2009	-31.2	121.67	IGNEOUS	VOLCANIC	BASALT	2700	20	51.37	0.72	13.72	3.3	10.64	6.6		0.17	5.88	11.01	0.83	0.73	0.08	5.38	11.46	23.11	2.66	10.88	2.56	0.79	2.96	0.51	3.26	0.69	1.96	0.31	1.98	0.31	34	221	155	55	73	81	102	78		281.6
SE2-7	GEOROC	SAID, N.; KERRICH, R., 2009	-31.2	121.67	IGNEOUS	VOLCANIC	BASALT	2700	20	52.86	0.75	14.12	2.35	10.89	7.68		0.18	6.09	8.94	1.97	0.33	0.08	4.49	11.19	23	2.69	11.11	2.52	0.79	2.92	0.49	3.14	0.63	1.85	0.29	1.84	0.29	35	221	168	55	76	87	56	80		103.2
BN309-2	GEOROC	SAID, N.; KERRICH, R., 2010	-32.2	121.77	IGNEOUS	VOLCANIC	BASALT	2700	0	47.51	0.36	9.3	0.98	11.72	9.66		0.19	18.3	6.95	0.2	0.11	0.03	5.99	1.35	3.66	0.57	2.95	0.9	0.38	1.2	0.21	1.38	0.31	0.87	0.14	0.89	0.15	25	164	2320	80	636			18		2.4
BN309-3	GEOROC	SAID, N.; KERRICH, R., 2010	-32.2	121.77	IGNEOUS	VOLCANIC	BASALT	2700	0	47.42	0.73	7.62	1.42	15.6	12.75		0.25	17.24	6.25	0.21	1.24	0.06	4.34	2.37	6.58	0.99	5.16	1.6	0.6	2.14	0.38	2.6	0.56	1.54	0.25	1.67	0.26	31	274	2334	89	631			36		58.6
BN309-4	GEOROC	SAID, N.; KERRICH, R., 2010	-32.2	121.77	IGNEOUS	VOLCANIC	BASALT	2700	0	48.32	0.39	9.56	1.2	11.9	9.63		0.21	18.1	6.91	0.21	0.03	0.03	5	0.97	2.79	0.44	2.72	0.92	0.26	1.17	0.21	1.43	0.3	0.87	0.15	0.97	0.16	26	160	2415	80	624			20		0.5
BN310-2	GEOROC	SAID, N.; KERRICH, R., 2010	-32.2	121.77	IGNEOUS	VOLCANIC	BASALT	2700	0	46.05	0.49	10.67	1.52	12.29	9.69		0.19	17.12	7.16	0.21	0.62	0.04	5.78	1.43	3.85	0.62	3.18	1.06	0.35	1.46	0.26	1.79	0.38	1.12	0.18	1.2	0.19	32	202	2711	82	621			22		64.9
BN310-4	GEOROC	SAID, N.; KERRICH, R., 2010	-32.2	121.77	IGNEOUS	VOLCANIC	BASALT	2700	0	48.43	0.42	10.34	0.96	11.37	9.37		0.2	16.81	7.35	0.23	1.04	0.04	4.44	1.67	4.2	0.64	3.19	1.01	0.38	1.3	0.23	1.53	0.34	0.97	0.16	1.02	0.17	26	173	2074	77	556			24		66.3
BN310-7	GEOROC	SAID, N.; KERRICH, R., 2010	-32.2	121.77	IGNEOUS	VOLCANIC	BASALT	2700	0	45.19	0.54	11.74	1.28	13.3	10.82		0.21	17.06	6.58	0.64	0.07	0.05	5.46	1.75	4.82	0.74	3.79	1.23	0.5	1.67	0.29	1.98	0.44	1.23	0.2	1.33	0.21	31	216	2137	81	561			28		5.8
BN310-8	GEOROC	SAID, N.; KERRICH, R., 2010	-32.2	121.77	IGNEOUS	VOLCANIC	BASALT	2700	0	48.82	0.48	12.46	1.34	10.92	8.62		0.18	12.79	8.71	0.39	1.58	0.04	4.29	1.57	4.2	0.65	3.46	1.15	0.43	1.56	0.27	1.85	0.4	1.15	0.18	1.23	0.2	32	202	1370	68	372			28		134.3
BVD1-1	GEOROC	SAID, N.; KERRICH, R., 2010	-30	121	IGNEOUS	VOLCANIC	BASALT	2700	0	45.77	0.48	8.49	2.22	11.69	8.52		0.18	20.2	7.71	0.85	0.19	0.04	4.81	1.63	4.52	0.68	3.63	1.18	0.44	1.58	0.27	1.75	0.38	1.07	0.16	1.06	0.17	29	173	2407	87	1004			29		14.7
BVD1-3	GEOROC	SAID, N.; KERRICH, R., 2010	-30	121	IGNEOUS	VOLCANIC	BASALT	2700	0	45.54	0.48	8.44	1.49	11.56	9.06		0.18	19.78	8.21	0.73	0.33	0.04	5.25	1.98	5.09	0.77	3.78	1.22	0.48	1.63	0.28	1.88	0.41	1.11	0.18	1.13	0.17	30	173	2388	88	1008			30		23.6
CD 259-13	GEOROC	SAID, N.; KERRICH, R., 2010	-31.3471	121.75	IGNEOUS	VOLCANIC	BASALT	2700	0	54.74	1.02	15.62	2.15	8.69	5.88		0.11	6.14	5.25	2.98	0.58	0.12	5.22	7.15	16.51	2.1	9.76	2.53	0.94	3.14	0.53	3.45	0.71	1.97	0.3	1.95	0.29	41	291	78	60	59			97		181.5
CD 259-14	GEOROC	SAID, N.; KERRICH, R., 2010	-31.3471	121.75	IGNEOUS	VOLCANIC	BASALT	2700	0	51.78	0.81	15.19	2.96	10.42	6.71		0.15	6.66	7.74	2.7	0.38	0.09	4.72	4.46	11.18	1.51	7.31	2	0.77	2.54	0.45	2.96	0.63	1.76	0.27	1.7	0.24	40	257	198	58	62			74		110
CD 259-17	GEOROC	SAID, N.; KERRICH, R., 2010	-31.3471	121.75	IGNEOUS	VOLCANIC	BASALT	2700	0	54	0.76	16.11	1.17	7.99	6.14		0.15	6.59	6.35	3.35	0.04	0.09	5.14	4.63	11.37	1.55	7.48	2.16	0.7	2.83	0.49	3.28	0.72	1.99	0.3	1.95	0.28	34	238	360	59	96			68		18.9
CD 687-1A	GEOROC	SAID, N.; KERRICH, R., 2010	-31.3792	121.774	IGNEOUS	VOLCANIC	BASALT	2700	0	51.07	0.75	15.51	3.54	9.41	5.28		0.12	6.85	10.56	2.31	0.92	0.08	2.66	4.76	11.41	1.55	7.38	2.15	0.71	2.91	0.52	3.43	0.75	2.07	0.35	2.27	0.35	38	247	303	69	71			65		229.2
CD 687-3	GEOROC	SAID, N.; KERRICH, R., 2010	-31.3792	121.774	IGNEOUS	VOLCANIC	SHOSHONITE	2700	0	52.81	0.67	14.53	3.71	9.78	5.46		0.15	6.57	10.51	3.57	0.55	0.08	1.2	3.81	11.38	1.39	6.71	2.02	0.63	2.73	0.48	3.24	0.71	1.97	0.32	2.11	0.31	33	215	646	77	202			60		89.1
CD339 W3-10	GEOROC	SAID, N.; KERRICH, R., 2010	-31.3695	121.783	IGNEOUS	VOLCANIC	BASALT	2700	0	49.81	0.65	14.17	2.77	11.25	7.63		0.18	10.06	9.96	1.88	0.19	0.07	2.12	4.38	10.01	1.4	5.99	1.81	0.65	2.32	0.4	2.73	0.59	1.76	0.26	1.75	0.27	33	206	605	69	184			57		30.5
CD339 W3-11	GEOROC	SAID, N.; KERRICH, R., 2010	-31.3695	121.783	IGNEOUS	VOLCANIC	BASALT	2700	0	47.88	0.69	15.83	1.43	10.52	8.19		0.15	11.47	7.68	2.01	0.04	0.08	4.32	4.21	10.22	1.45	6.15	1.84	0.59	2.35	0.4	2.68	0.57	1.7	0.24	1.62	0.24	35	232	1081	86	409			59		28.6
CD339 W3-8	GEOROC	SAID, N.; KERRICH, R., 2010	-31.3695	121.783	IGNEOUS	VOLCANIC	BASALT	2700	0	48.12	0.72	14.97	2.04	13.95	10.72		0.27	7.81	9.36	1.4	0.11	0.06	4.27	4.18	10.51	1.42	6.81	1.95	0.71	2.71	0.45	3.18	0.68	1.97	0.3	1.83	0.26	37	230	710	65	187			60		15.1
CD339 W3-9	GEOROC	SAID, N.; KERRICH, R., 2010	-31.3695	121.783	IGNEOUS	VOLCANIC	BASALT	2700	0	48.82	0.62	13.38	1.65	11.35	8.73		0.18	11.76	9.91	1.26	0.05	0.07	3.27	3.95	9.93	1.38	5.86	1.81	0.63	2.4	0.42	2.78	0.6	1.78	0.26	1.74	0.26	34	203	770	73	279			53		17.5
KD 330-8	GEOROC	SAID, N.; KERRICH, R., 2010	-31.1346	121.677	IGNEOUS	VOLCANIC	BASALT	2700	0	49.72	0.74	16.21	1.4	11.82	9.38		0.21	7.43	5.15	1.8	0.59	0.07	7.12	3.04	8.76	1.34	6.41	2.04	0.72	2.83	0.48	3.3	0.7	2.01	0.29	1.87	0.29	36	258	754	74	169			63		47.3
MRD001-2	GEOROC	SAID, N.; KERRICH, R., 2010	-32.2	121.77	IGNEOUS	VOLCANIC	BASALT	2700	0	47.81	0.5	10.12	1.18	12.02	9.75		0.2	16.53	7.3	0.26	0.24	0.04	5.67	1.9	5	0.75	3.75	1.22	0.4	1.7	0.28	2.07	0.46	1.3	0.19	1.32	0.21	27	196	2127	68	538			28		36.4
NMXD36-1	GEOROC	SAID, N.; KERRICH, R., 2010	-30.2593	120.907	IGNEOUS	VOLCANIC	BASALT	2700	0	45.82	0.42	11.56	1.65	11.53	8.88		0.18	16.87	7.76	1.07	0.04	0.04	5.39	1.33	3.43	0.49	2.18	0.78	0.33	1.2	0.22	1.52	0.34	1.03	0.15	0.96	0.15	30	180	1531	85	594			27		12.8
NMXD36-2	GEOROC	SAID, N.; KERRICH, R., 2010	-30.2593	120.907	IGNEOUS	VOLCANIC	BASALT	2700	0	49.68	0.5	14.09	2.39	11.17	7.89		0.19	10.77	8.71	2.27	0.16	0.05	3.05	1.63	4.08	0.59	3	1.05	0.43	1.56	0.3	2.18	0.49	1.35	0.22	1.39	0.21	37	217	812	68	233			29		47.8
NMXD36-7	GEOROC	SAID, N.; KERRICH, R., 2010	-30.2593	120.907	IGNEOUS	VOLCANIC	BASALT	2700	0	46.61	0.42	10.86	1.56	10.81	8.32		0.18	17.67	8.02	1.25	0.12	0.03	4.56	1.61	3.81	0.53	2.45	0.74	0.27	1.09	0.2	1.4	0.32	0.92	0.15	0.97	0.16	29	182	2170	84	758			20		32.3
NMXD41-1	GEOROC	SAID, N.; KERRICH, R., 2010	-30.2648	120.903	IGNEOUS	VOLCANIC	BASALT	2700	0	49.15	0.49	13.15	1.18	10.81	8.66		0.17	11.83	9.31	1.93	0.31	0.04	3.51	1.04	2.68	0.42	2.12	0.81	0.4	1.45	0.27	1.85	0.41	1.15	0.18	1.18	0.17	36	215	1022	68	221			24		53.9
OB1	GEOROC	SAID, N.; KERRICH, R., 2010	-30.3075	120.993	IGNEOUS	VOLCANIC	BASALT	2700	0	46.64	0.41	11.21	2.39	11.07	7.81		0.21	16.65	9	1.23	0.07	0.04	3.98	1.25	3.17	0.48	2.52	0.85	0.29	1.39	0.26	1.76	0.4	1.15	0.19	1.2	0.19	28	178	2037	79	737			20		42.1
OB2	GEOROC	SAID, N.; KERRICH, R., 2010	-30.3093	120.995	IGNEOUS	VOLCANIC	BASALT	2700	0	46.38	0.42	11.79	2.83	11.67	7.95		0.21	14.45	9.19	1.46	0.08	0.04	4.94	1.23	3.09	0.47	2.42	0.86	0.3	1.31	0.25	1.77	0.38	1.12	0.18	1.18	0.19	31	186	1456	80	516			25		41.8
PDC2	GEOROC	SAID, N.; KERRICH, R., 2010	-30.5373	121.229	IGNEOUS	VOLCANIC	BASALT	2700	0	49.35	1.23	13.84	3.46	12.62	8.24		0.2	6.54	9.81	2.71	0.11	0.12	4.2	6.61	15.97	2.15	10.58	2.95	1.03	3.7	0.63	4.24	0.88	2.45	0.37	2.44	0.37	34	277	264	46	85			85		28.1
PDC3	GEOROC	SAID, N.; KERRICH, R., 2010	-30.5373	121.229	IGNEOUS	VOLCANIC	BASALT	2700	0	49.96	1.2	14.39	4.42	12.55	7.32		0.18	6.88	10.76	1.6	0.25	0.13	2.66	6.82	16.52	2.23	10.36	3	1.05	3.89	0.66	4.21	0.89	2.45	0.39	2.52	0.38	30	250	261	49	128			84		36.2
PDC4	GEOROC	SAID, N.; KERRICH, R., 2010	-30.5373	121.229	IGNEOUS	VOLCANIC	BASALT	2700	0	49.37	1.2	14.29	3.11	12.38	8.35		0.18	6.4	10.54	1.89	0.5	0.13	3.67	6.75	16.12	2.18	10.48	3.06	1.05	3.89	0.65	4.23	0.88	2.47	0.38	2.37	0.38	34	268	263	65	115			86		67.9
PDC5	GEOROC	SAID, N.; KERRICH, R., 2010	-30.5373	121.229	IGNEOUS	VOLCANIC	BASALT	2700	0	50.34	1.22	14.48	3.47	12.57	8.19		0.17	6.83	9.8	1.58	0.33	0.13	3.22	6.79	16.31	2.24	10.44	3.06	1.04	3.89	0.64	4.22	0.91	2.52	0.39	2.48	0.38	34	270	268	58	121			86		68.1
PDC8	GEOROC	SAID, N.; KERRICH, R., 2010	-30.3809	121.062	IGNEOUS	VOLCANIC	BASALT	2700	0	49.02	1.13	14.43	3.55	12.16	7.74		0.19	6.68	11.63	1.86	0.39	0.12	2.92	5.97	14.53	1.98	9.64	2.74	0.97	3.5	0.59	3.89	0.81	2.18	0.35	2.26	0.34	31	236	291	49	119			80		73.9
PDC9	GEOROC	SAID, N.; KERRICH, R., 2010	-30.3809	121.062	IGNEOUS	VOLCANIC	BASALT	2700	0	49.46	1.15	14.55	2.67	12.04	8.44		0.19	6.46	11.64	1.75	0.27	0.12	3.12	6.99	15.03	2.22	10.79	3.11	1.14	3.93	0.66	4.42	0.92	2.82	0.37	2.51	0.4	34	254	300	61	134			82		63
SPD 118-2	GEOROC	SAID, N.; KERRICH, R., 2010	-32.2	121.77	IGNEOUS	VOLCANIC	BASALT	2700	0	48.35	0.91	4.88	2.43	14.68	11.03		0.24	17.13	10.06	0.23	0.03	0.06	3.49	3.3	9.7	1.49	7.17	2.06	0.63	2.33	0.37	2.29	0.45	1.22	0.19	1.17	0.18	27	212	1520	85	1083			43		0.4
SPD 123-1	GEOROC	SAID, N.; KERRICH, R., 2010	-32.2	121.77	IGNEOUS	VOLCANIC	BASALT	2700	0	48.84	0.66	3.76	1.09	13.54	11.2		0.22	17.12	11.34	0.24	0.03	0.04	4.02	2.33	6.97	1.11	7.25	2.11	0.76	2.05	0.33	1.95	0.39	1.01	0.14	0.93	0.15	36	173	1289	82	1031			32		0.4
SPD 123-2	GEOROC	SAID, N.; KERRICH, R., 2010	-32.2	121.77	IGNEOUS	VOLCANIC	BASALT	2700	0	47.37	0.92	5.23	2.31	16.38	12.66		0.23	17.17	9.52	0.24	0.03	0.06	2.77	4.42	12.59	1.89	8.63	2.43	0.85	2.77	0.43	2.49	0.48	1.28	0.18	1.23	0.18	31	218	1145	93	1100			46		0.3
SPD 124-2	GEOROC	SAID, N.; KERRICH, R., 2010	-32.2	121.77	IGNEOUS	VOLCANIC	BASALT	2700	0	46.95	0.86	4.96	1.24	15.65	12.96		0.25	17.17	10.27	0.24	0.04	0.06	3.59	4.55	12.96	1.95	9.86	2.6	0.92	2.81	0.41	2.67	0.52	1.34	0.2	1.27	0.19	31	199	1308	94	1071			44		1.5
V3	GEOROC	SAID, N.; KERRICH, R., 2010	-30.3843	121.062	IGNEOUS	VOLCANIC	BASALT	2700	0	48.4	1.34	16.69	1.85	14.18	11.09		0.28	4.21	9.67	2.58	0.71	0.12	2.93	3.7	10.49	1.57	7.7	2.31	0.88	3.16	0.56	3.74	0.78	2.23	0.35	2.28	0.36	36	322	128	45	58			83		39.5
VC2	GEOROC	SAID, N.; KERRICH, R., 2010	-30.3809	121.062	IGNEOUS	VOLCANIC	BASALT	2700	0	48.1	1.29	16.18	2.78	13.73	9.85		0.22	5.14	10.04	1.83	0.57	0.12	3.65	4.37	11.8	1.76	9.8	3.15	0.99	3.96	0.69	4.7	0.99	2.77	0.44	2.73	0.41	35	307	117	49	61			84		144.9
VC3	GEOROC	SAID, N.; KERRICH, R., 2010	-30.3809	121.062	IGNEOUS	VOLCANIC	BASALT	2700	0	47.62	1.26	16.55	2.9	13.06	9.15		0.22	3.92	10.35	1.94	0.23	0.11	5.54	4.77	12.47	1.9	9.64	3.04	1.02	4.16	0.73	4.72	1	2.79	0.44	2.85	0.42	34	305	116	52	55			80		55.8
VC4	GEOROC	SAID, N.; KERRICH, R., 2010	-30.3809	121.062	IGNEOUS	VOLCANIC	BASALT	2700	0	47.88	1.26	16.74	2.67	13.74	9.96		0.22	5.06	9.42	2.92	0.32	0.11	3.26	4.47	12.07	1.8	9.18	2.91	1.03	4.07	0.69	4.75	1	2.8	0.44	2.87	0.43	38	308	118	44	60			78		66.9
VC5	GEOROC	SAID, N.; KERRICH, R., 2010	-30.3809	121.062	IGNEOUS	VOLCANIC	BASALT	2700	0	47.98	1.27	16.51	3.2	13.49	9.26		0.22	4.65	10.18	2.76	0.17	0.11	3.48	4.63	12.48	1.86	9.62	3.06	1.03	4.17	0.72	4.8	1.03	2.91	0.43	2.81	0.42	37	298	119	49	57			80		52.2
2019-01-25	GEOROC	SAID, N.; KERRICH, R.; GROVES, D. I., 2010	-28	121	IGNEOUS	VOLCANIC	BASALT	2700	0	49.5	1.15	14.8	3.06	14.2	10.1		0.22	6.76	9.23	3.33	0.16	0.09	1.44	3.76	10.8	1.63	8.52	2.64	1.04	3.61	0.64	4.19	0.89	2.44	0.37	2.3	0.3	43	340	290	69	127	111	126	64		24.4
2019-02-14	GEOROC	SAID, N.; KERRICH, R.; GROVES, D. I., 2010	-28	121	IGNEOUS	VOLCANIC	BASALT	2700	0	48.44	1.44	13.86	4.16	16.2	10.83		0.25	4.53	11.03	1.98	0.34	0.14	2.86	6.77	16.77	2.44	11.99	3.55	1.12	4.76	0.81	5.34	1.15	3.32	0.51	3.4	0.5	41	344	95	72	74	132	183	99		32
2019-02-15	GEOROC	SAID, N.; KERRICH, R.; GROVES, D. I., 2010	-28	121	IGNEOUS	VOLCANIC	BASALT	2700	0	46.35	1.51	11.8	0.8	15.45	13.19		0.18	4.28	7.65	2.4	0.02	0.14	11.53	8.02	20.54	2.83	14	3.58	1.28	4.81	0.8	5.58	1.2	3.28	0.47	3.25	0.49	43	378	52	51	42	123	70	94		7.1
2019-02-17	GEOROC	SAID, N.; KERRICH, R.; GROVES, D. I., 2010	-28	121	IGNEOUS	VOLCANIC	BASALT	2700	0	45.5	1.14	14.2	1.33	13.3	10.8		0.18	6.82	7.75	2.14	0.35	0.1	9.52	3.96	10.8	1.65	8.69	2.72	0.98	3.59	0.63	4.27	0.93	2.61	0.37	2.4	0.34	40	306	215	51	107	99	68	67		72.9
2019-03-25	GEOROC	SAID, N.; KERRICH, R.; GROVES, D. I., 2010	-28	121	IGNEOUS	VOLCANIC	BASALT	2700	0	49.8	1.11	14.1	3.1	13.6	9.4		0.18	7.58	9.95	2.24	0.25	0.08	2.07	3.95	10.4	1.57	8.2	2.58	0.96	3.41	0.59	3.9	0.86	2.36	0.36	2.25	0.33	42	324	274	66	124	77	99	42		45.9
2019-03-26	GEOROC	SAID, N.; KERRICH, R.; GROVES, D. I., 2010	-28	121	IGNEOUS	VOLCANIC	BASALT	2700	0	50.14	1.04	13.88	2.43	13.08	9.59		0.18	7.49	9.81	2.68	0.16	0.08	2.41	3.64	9.72	1.5	7.62	2.47	0.92	3.27	0.57	3.65	0.83	2.25	0.34	2.16	0.32	42	310	275	67	124	112	6	70		20
2019-04-26	GEOROC	SAID, N.; KERRICH, R.; GROVES, D. I., 2010	-28	121	IGNEOUS	VOLCANIC	BASALT	2700	0	54.6	1.25	12.7	2.46	13.2	9.67		0.24	5.91	8.59	2.56	0.24	0.1	1.64	3.48	10.2	1.56	7.98	2.73	1.07	3.87	0.7	4.58	1.01	2.75	0.42	2.6	0.4	41	352	115	68	79	104	73	59		43.6
2019-06-26	GEOROC	SAID, N.; KERRICH, R.; GROVES, D. I., 2010	-28	121	IGNEOUS	VOLCANIC	BASALT	2700	0	51.1	0.71	14.5	0.26	10.7	9.37		0.19	8.32	11.1	2.63	0.13	0.07	1.47	2.89	7.7	1.18	5.88	1.79	0.71	2.47	0.45	2.89	0.67	1.87	0.29	1.8	0.27	39	272	443	64	195	77	99	42
049-3	GEOROC	SAID, N.; KERRICH, R.; GROVES, D. I., 2010	-28	121	IGNEOUS	VOLCANIC	BASALT	2700	0	50.15	0.57	15.12	2.62	10.64	7.22		0.16	8.09	10.82	1.67	0.05	0.06	3.35	2.14	5.36	0.76	3.76	1.26	0.49	1.83	0.32	2.31	0.51	1.43	0.24	1.48	0.22	39	222	412	58	108	72	47	38		17.5
049-4	GEOROC	SAID, N.; KERRICH, R.; GROVES, D. I., 2010	-28	121	IGNEOUS	VOLCANIC	BASALT	2700	0	48.68	0.59	15.58	2.94	10.66	6.95		0.16	8.58	10.51	1.58	0.05	0.06	4.21	2.41	5.98	0.87	3.97	1.31	0.51	1.9	0.33	2.39	0.53	1.53	0.22	1.53	0.23	40	236	362	58	96	67	90	39		18.8
051-3	GEOROC	SAID, N.; KERRICH, R.; GROVES, D. I., 2010	-28	121	IGNEOUS	VOLCANIC	BASALT	2700	0	49.4	0.82	15	1.85	10.6	7.84		0.21	5.92	13.9	1.91	0.12	0.06	2.72	2.43	6.66	1.03	5.67	1.86	0.77	2.61	0.45	3.11	0.69	1.91	0.29	1.79	0.26	40	257	432	70	197	80	100	42		28.3
063-1	GEOROC	SAID, N.; KERRICH, R.; GROVES, D. I., 2010	-28	121	IGNEOUS	VOLCANIC	BASALT	2700	0	54.6	0.82	15.2	6.4	9.47	2.76		0.18	5.47	7.87	4.93	0.13	0.06	1.39	2.33	6.52	1.04	5.53	1.87	0.68	2.56	0.47	3.15	0.69	1.87	0.29	1.86	0.26	39	269	442	73	203	66	39	44		72.9
063-2	GEOROC	SAID, N.; KERRICH, R.; GROVES, D. I., 2010	-28	121	IGNEOUS	VOLCANIC	BASALT	2700	0	51.67	0.82	15.18	5.59	11.25	5.09		0.23	5.99	8.93	4.21	0.16	0.06	1.76	2.23	6.31	0.99	5.33	1.8	0.72	2.57	0.45	3.06	0.66	1.89	0.29	1.76	0.27	40	268	447	66	185	85	66	43		73.6
1112-3	GEOROC	SAID, N.; KERRICH, R.; GROVES, D. I., 2010	-28	121	IGNEOUS	VOLCANIC	BASALT	2700	0	49.88	1.05	14.91	2.26	12.72	9.41		0.19	7.54	10.43	2.32	0.15	0.08	1.57	2.58	7.61	1.2	6.66	2.28	0.79	3.15	0.55	3.7	0.78	2.2	0.35	2.29	0.36	41	297	195	75	147	93	72	59		45.8
116-1	GEOROC	SAID, N.; KERRICH, R.; GROVES, D. I., 2010	-28	121	IGNEOUS	VOLCANIC	BASALT	2700	0	50.7	0.89	14.5	2.05	12.4	9.27		0.27	6.53	9.79	2.99	0.14	0.07	2.62	2.66	7.24	1.12	6.08	2	0.85	2.77	0.5	3.3	0.75	2.08	0.32	2.08	0.33	46	301	244	65	115	102	90	46		32.5
116-3	GEOROC	SAID, N.; KERRICH, R.; GROVES, D. I., 2010	-28	121	IGNEOUS	VOLCANIC	BASALT	2700	0	51.17	0.9	14.55	2.28	12.61	9.3		0.25	6.73	11.32	1.83	0.13	0.07	1.23	2.67	7.51	1.18	5.61	1.95	0.75	2.75	0.48	3.41	0.73	2.18	0.32	2.1	0.33	46	295	238	69	111	98	119	46		27.6
117-1	GEOROC	SAID, N.; KERRICH, R.; GROVES, D. I., 2010	-28	121	IGNEOUS	VOLCANIC	BASALT	2700	0	51	0.9	15	2.5	12	8.7		0.3	7	10	2.7	0.1	0.1	1.3	2.8	7.5	1.2	6.3	2.1	0.8	2.8	0.5	3.3	0.7	2.1	0.3	2.1	0.3	48	312	248	73	122	97	107	48		23
118-6	GEOROC	SAID, N.; KERRICH, R.; GROVES, D. I., 2010	-28	121	IGNEOUS	VOLCANIC	BASALT	2700	0	49.79	0.85	13.8	2.85	13.86	9.91		0.23	7.12	11.46	1.31	0.13	0.07	2.25	2.39	6.79	1.07	5.62	1.88	0.75	2.69	0.47	3.12	0.73	2.02	0.31	2	0.3	44	291	233	67	110	103	112	44		10.4
118-7	GEOROC	SAID, N.; KERRICH, R.; GROVES, D. I., 2010	-28	121	IGNEOUS	VOLCANIC	BASALT	2700	0	51.25	0.92	14.52	1.98	11.83	8.86		0.23	7.3	10.45	2.9	0.12	0.08	1.26	2.8	7.66	1.2	6.39	2.07	0.82	2.83	0.51	3.42	0.76	2.1	0.33	2.04	0.31	46	304	245	71	119	99	136	48		20
120-1	GEOROC	SAID, N.; KERRICH, R.; GROVES, D. I., 2010	-28	121	IGNEOUS	VOLCANIC	BASALT	2700	0	50.93	0.9	14.5	2.23	11.8	8.61		0.24	7.25	10.43	2.64	0.1	0.07	1.96	2.72	7.31	1.12	5.98	1.95	0.74	2.78	0.49	3.23	0.73	2.07	0.31	2.09	0.3	46	301	246	73	118	85	140	47		32.2
120-2	GEOROC	SAID, N.; KERRICH, R.; GROVES, D. I., 2010	-28	121	IGNEOUS	VOLCANIC	BASALT	2700	0	50.9	0.96	14.7	2.01	11.8	8.84		0.22	7.53	10.4	2.78	0.11	0.08	1.22	2.73	7.6	1.16	6.27	2	0.85	2.85	0.51	3.35	0.75	2.06	0.31	2.03	0.3	49	316	231	68	104	93	109	50		52.8
121-1	GEOROC	SAID, N.; KERRICH, R.; GROVES, D. I., 2010	-28	121	IGNEOUS	VOLCANIC	BASALT	2700	0	50.2	0.91	14.3	3.22	13.3	9.06		0.24	7.22	10.7	2.19	0.09	0.07	1.7	2.56	7.46	1.19	5.81	1.96	0.69	2.68	0.48	3.3	0.7	2.1	0.32	2.03	0.32	46	307	250	71	120	94	115	47		17.6
121-2	GEOROC	SAID, N.; KERRICH, R.; GROVES, D. I., 2010	-28	121	IGNEOUS	VOLCANIC	BASALT	2700	0	51.1	0.91	14.5	1.74	12.5	9.7		0.24	7.09	11.5	2	0.07	0.07	1.01	2.69	7.31	1.15	6.07	1.99	0.71	2.75	0.5	3.35	0.73	2.1	0.33	2.41	0.33	45	294	235	72	117	93	114	46		17.6
122-3	GEOROC	SAID, N.; KERRICH, R.; GROVES, D. I., 2010	-28	121	IGNEOUS	VOLCANIC	BASALT	2700	0	50.4	0.9	14.2	1.61	12.6	9.86		0.27	6.65	10.7	2.29	0.17	0.07	2.77	2.47	6.8	1.08	5.68	1.9	0.75	2.54	0.46	3.12	0.7	2.02	0.32	2.07	0.32	43	302	246	72	116	107	14	47		33.4
127-1	GEOROC	SAID, N.; KERRICH, R.; GROVES, D. I., 2010	-28	121	IGNEOUS	VOLCANIC	BASALT	2700	0	49.7	0.88	14.1	2.42	13.8	10.3		0.23	7.01	11.2	2.05	0.12	0.07	1.65	2.66	7.27	1.12	5.6	1.96	0.76	2.68	0.48	3.34	0.73	2.1	0.33	2.12	0.34	46	299	235	72	109	100	136	46		28.9
127-3	GEOROC	SAID, N.; KERRICH, R.; GROVES, D. I., 2010	-28	121	IGNEOUS	VOLCANIC	BASALT	2700	0	51.6	0.9	14.4	1.98	12.1	9.11		0.24	6.56	9.71	3.67	0.14	0.07	1.5	2.59	7.22	1.12	5.96	2	0.75	2.65	0.48	3.21	0.73	2	0.31	2.09	0.33	45	303	237	77	118	78	11	47		55.9
1327-1	GEOROC	SAID, N.; KERRICH, R.; GROVES, D. I., 2010	-28	121	IGNEOUS	VOLCANIC	BASALT	2700	0	49.53	0.93	14.73	1.62	12.68	9.96		0.24	7.59	10.46	2.75	0.15	0.08	1.85	2.7	7.38	1.18	6.37	2.12	0.83	3.05	0.54	3.68	0.8	2.26	0.35	2.24	0.35	41	283	217	73	171	109	77	50		32
1327-2	GEOROC	SAID, N.; KERRICH, R.; GROVES, D. I., 2010	-28	121	IGNEOUS	VOLCANIC	BASALT	2700	0	49.08	0.95	15.04	6.13	13.37	6.52		0.22	7.57	10.66	2.49	0.15	0.07	0.98	2.79	7.51	1.19	6.39	2.16	0.88	3.09	0.55	3.65	0.82	2.3	0.36	2.29	0.36	41	290	221	71	173	116	134	51		43.7
15-15-2	GEOROC	SAID, N.; KERRICH, R.; GROVES, D. I., 2010	-28	121	IGNEOUS	VOLCANIC	BASALT	2700	0	48.63	0.89	14.52	5.01	12.11	6.39		0.18	7.58	10.78	2.47	1	0.07	2.25	2.58	7.34	1.13	6.22	2.05	0.77	2.85	0.49	3.35	0.72	2.04	0.32	2.07	0.31	40	277	334	70	184	124	114	49		67.9
15-15-6	GEOROC	SAID, N.; KERRICH, R.; GROVES, D. I., 2010	-28	121	IGNEOUS	VOLCANIC	BASALT	2700	0	48.68	0.9	14.77	5.07	12.71	6.87		0.18	7.23	11.12	2.96	0.42	0.07	0.96	2.69	7.55	1.19	6.38	2.06	0.78	2.92	0.53	3.55	0.76	2.11	0.33	2.08	0.33	40	274	333	72	174	93	205	48		77.1
1786-12A	GEOROC	SAID, N.; KERRICH, R.; GROVES, D. I., 2010	-28	121	IGNEOUS	VOLCANIC	BASALT	2700	0	48.43	0.65	13.62	2.03	12.62	9.52		0.2	9.48	12.55	1.13	0.13	0.06	1.89	2.05	5.71	0.86	4.56	1.43	0.58	1.91	0.35	2.37	0.51	1.44	0.23	1.48	0.22	40	236	460	70	154	105	74	38		19.9
1786-13	GEOROC	SAID, N.; KERRICH, R.; GROVES, D. I., 2010	-28	121	IGNEOUS	VOLCANIC	BASALT	2700	0	48.26	0.75	15.07	1.99	12.42	9.38		0.21	8.14	12.44	1.81	0.13	0.06	1.34	2.05	6.36	1.02	5.32	1.71	0.64	2.32	0.41	2.75	0.59	1.7	0.27	1.73	0.26	45	272	388	70	92	87	143	44		20.7
1887-6	GEOROC	SAID, N.; KERRICH, R.; GROVES, D. I., 2010	-28	121	IGNEOUS	VOLCANIC	BASALT	2700	0	52.79	0.8	14.39	1.56	10.65	8.18		0.19	7.09	10.42	2.14	0.09	0.07	2.16	2.93	7.95	1.26	5.82	1.95	0.73	2.56	0.45	3.13	0.67	2.05	0.29	2.04	0.33	49	297	262	68	67	86	111	47		10.2
1887-7	GEOROC	SAID, N.; KERRICH, R.; GROVES, D. I., 2010	-28	121	IGNEOUS	VOLCANIC	BASALT	2700	0	52.23	0.85	14.55	1.77	11.96	9.17		0.22	7.02	9.39	3.1	0.12	0.06	1.39	2.94	8.14	1.28	5.99	2.05	0.75	2.78	0.48	3.38	0.73	2.2	0.32	2.07	0.34	48	303	278	67	67	86	31	49		22.4
1月-64	GEOROC	SAID, N.; KERRICH, R.; GROVES, D. I., 2010	-28	121	IGNEOUS	VOLCANIC	BASALT	2700	0	49.93	0.75	14.12	2.85	12.73	8.9		0.2	8.04	12.07	1.2	0.16	0.05	1.41	3.06	7.68	1.07	5.58	1.76	0.68	2.38	0.41	2.77	0.61	1.7	0.26	1.67	0.26	42	263	301	68	138	83	116	42
1月-71	GEOROC	SAID, N.; KERRICH, R.; GROVES, D. I., 2010	-28	121	IGNEOUS	VOLCANIC	BASALT	2700	0	51	1.02	13.3	2.09	15.5	12.1		0.27	6.16	9.88	2	0.23	0.09	1.71	3.28	8.92	1.35	7.29	2.31	0.9	3.21	0.58	3.98	0.89	2.5	0.39	2.59	0.4	43	315	84	72	78	149	24	58		17.9
201-14	GEOROC	SAID, N.; KERRICH, R.; GROVES, D. I., 2010	-28	121	IGNEOUS	VOLCANIC	BASALT	2700	0	47.15	0.96	15.21	3.62	13.4	8.8		0.2	7.65	11.72	1.79	0.08	0.08	2.39	2.74	7.81	1.22	6.58	2.13	0.8	2.92	0.54	3.57	0.76	2.18	0.34	2.16	0.31	41	283	362	70	177	98	130	52		18.8
201-16	GEOROC	SAID, N.; KERRICH, R.; GROVES, D. I., 2010	-28	121	IGNEOUS	VOLCANIC	BASALT	2700	0	49.68	0.9	14.87	2.31	11.3	8.09		0.18	7.12	10.14	2.52	0.08	0.07	3.9	2.55	7.43	1.17	5.91	1.98	0.72	2.63	0.47	3.17	0.67	2.01	0.29	1.94	0.3	40	272	350	66	191	92	70	49		45.1
222-1	GEOROC	SAID, N.; KERRICH, R.; GROVES, D. I., 2010	-28	121	IGNEOUS	VOLCANIC	BASALT	2700	0	52.16	0.75	14.37	1.38	11.13	8.78		0.2	7.13	11.16	1.86	0.1	0.06	1.83	2.57	6.91	1.05	5.45	1.71	0.63	2.47	0.43	2.92	0.64	1.79	0.28	1.89	0.28	47	271	292	76	75	86	75	44		34.8
259-6	GEOROC	SAID, N.; KERRICH, R.; GROVES, D. I., 2010	-28	121	IGNEOUS	VOLCANIC	BASALT	2700	0	45.6	0.89	14.6	1.52	11.7	9.12		0.17	6.99	8.85	1.33	0.04	0.07	10.5	2.54	7.36	1.15	6.11	2.01	0.83	2.79	0.51	3.41	0.72	2.06	0.32	2.04	0.31	39	281	362	57	174	113	100	48		13.7
2月-64	GEOROC	SAID, N.; KERRICH, R.; GROVES, D. I., 2010	-28	121	IGNEOUS	VOLCANIC	BASALT	2700	0	49.72	0.76	14.76	2.74	12.04	8.37		0.19	7.71	11.99	1.57	0.15	0.05	1.74	3.1	7.58	1.07	5.5	1.78	0.63	2.34	0.41	2.69	0.61	1.64	0.25	1.67	0.26	43	264	322	67	144	80	98	43		16.9
330-13	GEOROC	SAID, N.; KERRICH, R.; GROVES, D. I., 2010	-28	121	IGNEOUS	VOLCANIC	BASALT	2700	0	47.93	0.9	14.76	2.59	12.91	9.29		0.18	7.63	10.8	1.62	0.07	0.07	4	2.75	8.05	1.26	5.97	2.01	0.81	2.84	0.49	3.41	0.73	2.15	0.31	2.03	0.32	38	267	341	70	180	119	104	48		14.5
330-14	GEOROC	SAID, N.; KERRICH, R.; GROVES, D. I., 2010	-28	121	IGNEOUS	VOLCANIC	BASALT	2700	0	45.65	1.02	15.82	2.6	13.98	10.24		0.19	8.78	8.82	1.84	0.08	0.08	4.75	2.77	8.09	1.31	6.18	2.17	0.75	3.04	0.54	3.53	0.76	2.17	0.3	2	0.31	37	268	396	71	213	138	35	56		14.1
392-8	GEOROC	SAID, N.; KERRICH, R.; GROVES, D. I., 2010	-28	121	IGNEOUS	VOLCANIC	BASALT	2700	0	51.32	0.72	14.53	1.62	11.42	8.82		0.2	7.56	11.9	1.9	0.11	0.06	1.14	3.08	7.62	1.23	5.33	1.74	0.63	2.48	0.44	3.01	0.64	1.93	0.28	1.82	0.29	45	270	372	73	122	83	77	42		14.8
412-13	GEOROC	SAID, N.; KERRICH, R.; GROVES, D. I., 2010	-28	121	IGNEOUS	VOLCANIC	BASALT	2700	0	50.16	0.93	15.59	0.34	7.88	6.79		0.16	4.27	10.21	2.32	0.17	0.08	8.81	2.6	7.25	1.14	5.98	1.93	0.75	2.55	0.43	2.84	0.61	1.65	0.25	1.5	0.23	32	273	336	61	282	65	98	50		45.3
412-8	GEOROC	SAID, N.; KERRICH, R.; GROVES, D. I., 2010	-28	121	IGNEOUS	VOLCANIC	BASALT	2700	0	47.5	0.9	14.98	1.21	9.93	7.85		0.18	4.4	12.19	0.86	0.03	0.07	9.52	2.77	7.71	1.19	6.43	2.08	0.85	2.82	0.5	3.32	0.71	2.02	0.31	1.96	0.29	38	288	351	59	206	76	78	48		9.6
422-2	GEOROC	SAID, N.; KERRICH, R.; GROVES, D. I., 2010	-28	121	IGNEOUS	VOLCANIC	BASALT	2700	0	50	0.92	15.45	2.15	11.73	8.61		0.24	7.12	10.49	2.6	0.09	0.08	2.06	2.62	7.38	1.18	6.32	2.2	0.89	3.2	0.58	3.91	0.89	2.45	0.38	2.4	0.35	44	307	297	74	151	124	34	48		45.7
422-7	GEOROC	SAID, N.; KERRICH, R.; GROVES, D. I., 2010	-28	121	IGNEOUS	VOLCANIC	BASALT	2700	0	51.6	0.93	16.2	1.86	11.2	8.43		0.2	6.23	9.74	3.23	0.13	0.07	0.96	2.55	7.15	1.13	6.12	2.11	0.79	3.06	0.57	3.87	0.86	2.38	0.37	2.39	0.35	45	305	298	76	136	95	109	50		21.2
447-7	GEOROC	SAID, N.; KERRICH, R.; GROVES, D. I., 2010	-28	121	IGNEOUS	VOLCANIC	BASALT	2700	0	50.01	0.92	15.07	0.57	8.88	7.48		0.23	3.2	10.26	2.34	0.04	0.08	9.56	3.12	7.41	1.27	6.8	2.18	0.7	3.1	0.56	3.91	0.82	2.44	0.34	2.2	0.35	36	277	342	66	191	122	90	51		37.6
447-8	GEOROC	SAID, N.; KERRICH, R.; GROVES, D. I., 2010	-28	121	IGNEOUS	VOLCANIC	BASALT	2700	0	48.05	0.96	15.85	0.84	8.49	6.88		0.19	4.02	10.78	2.78	0.05	0.08	9.33	2.68	7.64	1.2	6.29	2.09	0.83	2.94	0.5	3.38	0.71	2	0.31	1.94	0.29	36	290	358	63	225	80	110	52		33.9
447-9	GEOROC	SAID, N.; KERRICH, R.; GROVES, D. I., 2010	-28	121	IGNEOUS	VOLCANIC	BASALT	2700	0	45.95	0.92	15.04	1.12	10.88	8.78		0.19	6.27	9.99	0.9	0.02	0.07	10.53	2.47	6.9	1.09	5.71	1.84	0.75	2.58	0.46	3.07	0.66	1.82	0.28	1.84	0.28	42	294	357	67	330	86	112	50		6.8
495-5	GEOROC	SAID, N.; KERRICH, R.; GROVES, D. I., 2010	-28	121	IGNEOUS	VOLCANIC	BASALT	2700	0	51.8	0.71	14.5	1.52	10.3	7.87		0.22	6.3	12.4	1.98	0.13	0.06	2.24	2.29	6.48	1	5.29	1.66	0.6	2.43	0.42	2.86	0.63	1.74	0.28	1.83	0.28	46	266	364	78	120	79	98	42		14.4
495-6	GEOROC	SAID, N.; KERRICH, R.; GROVES, D. I., 2010	-28	121	IGNEOUS	VOLCANIC	BASALT	2700	0	50.66	0.71	14.48	1.64	11.1	8.52		0.22	7.5	11.91	1.83	0.12	0.06	2.07	3.05	7.63	1.22	5.54	1.83	0.64	2.36	0.41	2.86	0.62	1.8	0.26	1.76	0.28	46	270	376	72	118	88	87	42		12.9
4月-64	GEOROC	SAID, N.; KERRICH, R.; GROVES, D. I., 2010	-28	121	IGNEOUS	VOLCANIC	BASALT	2700	0	50.66	0.72	14.42	1.77	10.47	7.83		0.19	8.37	11.22	2.29	0.11	0.05	2.13	2.63	7.06	1.07	5.49	1.75	0.61	2.42	0.42	2.84	0.62	1.75	0.28	1.68	0.26	44	273	447	60	171	81	82	40		23.8
797-7	GEOROC	SAID, N.; KERRICH, R.; GROVES, D. I., 2010	-28	121	IGNEOUS	VOLCANIC	BASALT	2700	0	50.5	0.79	15.1	1.64	11.2	8.62		0.17	6.03	11.2	1.76	0.11	0.06	3.82	2.45	7.01	1.08	5.7	1.83	0.68	2.54	0.46	3.01	0.65	1.86	0.29	1.93	0.28	43	290	391	70	160	85	111	45		15
797-8	GEOROC	SAID, N.; KERRICH, R.; GROVES, D. I., 2010	-28	121	IGNEOUS	VOLCANIC	BASALT	2700	0	51.8	0.81	15.5	1.31	10.6	8.39		0.16	5.39	11	1.89	0.11	0.06	3.46	2.66	7.6	1.21	5.67	1.94	0.7	2.57	0.45	3.01	0.65	1.93	0.28	1.91	0.29	42	287	401	74	174	84	168	46		10.5
842-2	GEOROC	SAID, N.; KERRICH, R.; GROVES, D. I., 2010	-28	121	IGNEOUS	VOLCANIC	BASALT	2700	0	50.5	0.85	16.2	2.12	11.5	8.46		0.2	6.49	9.01	2.72	0.07	0.06	3.06	2.52	7.2	1.12	6.01	1.93	0.82	2.69	0.47	3.25	0.69	1.92	0.3	1.99	0.3	47	283	437	101	183	92	146	49		25.6
842-6	GEOROC	SAID, N.; KERRICH, R.; GROVES, D. I., 2010	-28	121	IGNEOUS	VOLCANIC	BASALT	2700	0	51.08	0.79	15.29	2.13	11.03	8		0.19	5.97	11.2	1.94	0.08	0.06	3.13	2.49	7.14	1.13	5.91	1.9	0.67	2.65	0.47	3.25	0.68	1.87	0.3	1.9	0.29	43	282	392	74	176	93	40	45		5.6
BA3	GEOROC	SAID, N.; KERRICH, R.; GROVES, D. I., 2010	-28	121	IGNEOUS	VOLCANIC	BASALT	2700	0	48.77	0.59	15.48	2.49	10.96	7.62		0.17	8.61	10.4	1.42	0.05	0.06	4.21	2.32	5.68	0.81	4	1.35	0.53	2	0.35	2.39	0.52	1.54	0.23	1.5	0.25	41	241	362	64	96	69	125	38		17.6
M1-1	GEOROC	SAID, N.; KERRICH, R.; GROVES, D. I., 2010	-28	121	IGNEOUS	VOLCANIC	BASALT	2700	0	48.8	1.4	13.61	2.9	16.12	11.9		0.25	4.87	9.48	2.79	0.35	0.13	3.44	6.25	15.88	2.26	11.15	3.27	1.05	4.34	0.74	4.95	1.04	2.88	0.46	3.03	0.48	36	322	94	81	81	140	10	97		58.8
M1-2	GEOROC	SAID, N.; KERRICH, R.; GROVES, D. I., 2010	-28	121	IGNEOUS	VOLCANIC	BASALT	2700	0	51.4	1.48	13.9	4.36	15.1	9.69		0.21	4.91	10.2	1.84	0.23	0.14	1.38	6.63	17.4	2.46	12.3	3.75	1.22	4.91	0.85	5.54	1.15	3.28	0.53	3.39	0.52	41	344	96	84	71	122	135	100		58
M9-2	GEOROC	SAID, N.; KERRICH, R.; GROVES, D. I., 2010	-28	121	IGNEOUS	VOLCANIC	BASALT	2700	0	50.14	1.46	13.99	3.8	16.13	11.09		0.25	4.77	9.58	2.23	0.28	0.14	2.14	6.57	16.25	2.28	11.27	3.4	1.19	4.54	0.78	5.35	1.11	3.17	0.49	3.27	0.51	38	329	95	84	77	115	114	97		72.3
M9-8	GEOROC	SAID, N.; KERRICH, R.; GROVES, D. I., 2010	-28	121	IGNEOUS	VOLCANIC	BASALT	2700	0	50.09	1.47	13.87	3.75	16.32	11.31		0.26	5.6	9.3	2.33	0.27	0.13	1.52	6.45	16.42	2.28	11.41	3.4	0.95	4.55	0.79	5.33	1.12	3.16	0.5	3.22	0.52	40	343	97	78	82	160	29	99		16
S3	GEOROC	SAID, N.; KERRICH, R.; GROVES, D. I., 2010	-28	121	IGNEOUS	VOLCANIC	BASALT	2700	0	49.99	1.48	14.08	2.35	16.18	12.44		0.25	5.47	8.75	2.96	0.46	0.14	1.44	6.8	17.36	2.48	12.21	3.48	1.24	4.61	0.81	5.42	1.15	3.29	0.51	3.41	0.52	40	343	98	72	76	143	90	101		138.9
S5	GEOROC	SAID, N.; KERRICH, R.; GROVES, D. I., 2010	-28	121	IGNEOUS	VOLCANIC	BASALT	2700	0	49.9	1.45	14	2.46	16.6	12.8		0.25	4.66	9.11	2.63	0.33	0.14	2.24	6.7	16.9	2.38	11.8	3.47	1.13	4.58	0.8	5.23	1.13	3.2	0.51	3.3	0.52	38	332	98	62	79	145	78	98		228
SC6	GEOROC	SAID, N.; KERRICH, R.; GROVES, D. I., 2010	-28	121	IGNEOUS	VOLCANIC	BASALT	2700	0	49.9	1.7	13	2.99	17	12.6		0.24	4.16	9.69	2.68	0.3	0.16	2.54	8.28	20.4	2.85	14	4.1	1.35	5.34	0.94	6.24	1.32	3.76	0.59	3.88	0.6	41	302	196	58	64	150	8	115		127
SC8	GEOROC	SAID, N.; KERRICH, R.; GROVES, D. I., 2010	-28	121	IGNEOUS	VOLCANIC	BASALT	2700	0	50.73	1.48	14.21	2.09	14.29	10.98		0.28	4.57	9.84	3.02	0.28	0.14	2.3	7.05	17.99	2.52	12.33	3.66	1.1	4.84	0.83	5.48	1.15	3.26	0.52	3.38	0.53	45	392	102	78	50	157	7	102		79.3
SC9	GEOROC	SAID, N.; KERRICH, R.; GROVES, D. I., 2010	-28	121	IGNEOUS	VOLCANIC	BASALT	2700	0	50.5	1.63	13.4	2.96	16.2	11.9		0.27	5.23	9	2.97	0.22	0.15	1.33	5.85	15.5	2.27	11.7	3.62	1.03	4.95	0.85	5.61	1.19	3.34	0.53	3.56	0.56	40	349	99	74	82	158	150	110		52
TW1	GEOROC	SAID, N.; KERRICH, R.; GROVES, D. I., 2010	-28	121	IGNEOUS	VOLCANIC	BASALT	2700	0	48.77	0.7	12.99	2.36	12.01	8.68		0.19	9.99	11.16	1.61	0.18	0.04	3.12	1.99	5.8	0.82	5.26	1.63	0.55	2.02	0.36	2.39	0.53	1.49	0.25	1.51	0.22	36	237	792	64	301	83	71	41		15.1
TW3	GEOROC	SAID, N.; KERRICH, R.; GROVES, D. I., 2010	-28	121	IGNEOUS	VOLCANIC	BASALT	2700	0	50.82	0.63	12.31	1.05	11.18	9.12		0.17	9.23	13.14	1.06	0.04	0.05	2.25	2.1	5.9	0.85	4.28	1.45	0.56	2.08	0.36	2.45	0.53	1.5	0.25	1.54	0.24	40	224	589	73	213	66	39	37		14.1
W2-3	GEOROC	SAID, N.; KERRICH, R.; GROVES, D. I., 2010	-28	121	IGNEOUS	VOLCANIC	BASALT	2700	0	50.15	1.46	13.85	2.48	16.08	12.23		0.22	5.82	8.1	2.66	0.47	0.14	2.05	6.47	16.67	2.34	11.69	3.54	1.17	4.75	0.83	5.52	1.18	3.3	0.54	3.46	0.53	38	331	99	72	57	150	111	105		221.2
W2-4	GEOROC	SAID, N.; KERRICH, R.; GROVES, D. I., 2010	-28	121	IGNEOUS	VOLCANIC	BASALT	2700	0	49.48	1.2	15.38	2.3	14.73	11.19		0.22	6	9.52	2.77	0.22	0.11	1.5	5.35	13.2	1.9	9.49	2.95	1.01	3.7	0.64	4.32	0.92	2.57	0.41	2.63	0.41	35	283	85	80	120	141	86	83		28.6
HS423	GEOROC	SANDEMAN, H. A.; HANMER, S.; DAVIS, W. J.; RYAN, J. J.; PETERSON, T. D., 2004	62	-94.5	IGNEOUS	VOLCANIC	BASALT	2700	10	45.04	1.26	9.89		18.99			0.25	9.28	9.15	1.34	0.11	0.16	3.74	7.15	18.6	2.75	74.06	22.07	1.3	5.09	0.86	5.61	1.17	3.46	0.46	3.04	0.41	48	357	223		78	98	61	115	15	30	0.46	0.16
HS424	GEOROC	SANDEMAN, H. A.; HANMER, S.; DAVIS, W. J.; RYAN, J. J.; PETERSON, T. D., 2004	62	-94.5	IGNEOUS	VOLCANIC	BASALT	2700	10	46.13	1.23	14.06		14.53			0.22	8.14	6.75	3.59	0.18	0.08	2.9	3.35	9.41	1.54	7.57	2.53	0.99	3.72	0.65	4.4	0.93	2.72	0.42	2.51	0.35	47	350	417		139	71	135	74	18	82	0.21	0.08
HS431A	GEOROC	SANDEMAN, H. A.; HANMER, S.; DAVIS, W. J.; RYAN, J. J.; PETERSON, T. D., 2004	62	-94.5	IGNEOUS	VOLCANIC	BASALT	2700	10	49.6	1.11	15.8		14.1			0.22	5.17	10.72	1.9	0.18	0.08	0.9	3.5	9.5	1.5	7.47	2.49	0.9	3.7	0.69	4.3	0.93	2.7	0.4	2.9	0.41	49	340	330	65	130	87	92	66	18	37	0.19	0.1
HS432	GEOROC	SANDEMAN, H. A.; HANMER, S.; DAVIS, W. J.; RYAN, J. J.; PETERSON, T. D., 2004	62	-94.5	IGNEOUS	VOLCANIC	BASALT	2700	10	51.4	1.12	15.8		12.2			0.2	5.18	11.15	2	0.2	0.09	0.7	3.6	10	1.6	7.46	2.51	0.97	3.9	0.7	4.7	1	2.8	0.46	3	0.46	46	320	310	56	130	73	110	66	18	65	0.19	0.13
HS444A	GEOROC	SANDEMAN, H. A.; HANMER, S.; DAVIS, W. J.; RYAN, J. J.; PETERSON, T. D., 2004	62	-94.5	IGNEOUS	VOLCANIC	ANDESITE	2700	10	53.9	1.41	17.5		8.1			0.12	4.92	9.12	3.4	0.48	0.25	0.6	13	33	4.5	18.93	4.42	1.4	4.6	0.72	4.4	0.87	2.4	0.36	2.3	0.38	25	190	170	44	99	35	29	145	18	130	0.6	0.31
HS451	GEOROC	SANDEMAN, H. A.; HANMER, S.; DAVIS, W. J.; RYAN, J. J.; PETERSON, T. D., 2004	62	-94.5	IGNEOUS	VOLCANIC	BASALT	2700	10	47.33	1.1	12.1		18.72			0.23	6.97	7.14	2.33	0.18	0.09	2.41	6.97	17.61	2.65	12.66	3.82	1.2	5.18	0.88	5.83	1.23	3.7	0.54	3.37	0.48	50	418	19		18	80	95	110	19	22	0.41	0.16
HS517	GEOROC	SANDEMAN, H. A.; HANMER, S.; DAVIS, W. J.; RYAN, J. J.; PETERSON, T. D., 2004	62	-94.5	IGNEOUS	VOLCANIC	BASALT	2700	10	50.05	1.34	12.51		15.99			0.36	4.18	12.91	2.21	0.28	0.08	1.59	4.36	11.74	1.88	9.1	2.92	1.05	4.17	0.7	4.93	1.06	3.04	0.45	3.07	0.47	61	393	35		32	83	101	83	20	178	0.26	0.06
HS540	GEOROC	SANDEMAN, H. A.; HANMER, S.; DAVIS, W. J.; RYAN, J. J.; PETERSON, T. D., 2004	62	-94.5	IGNEOUS	VOLCANIC	BASALT	2700	10	46.07	1.25	12.12		15.95			0.2	11.5	7.57	2.26	0.05	0.1	3	4.33	11.34	1.78	8.94	2.87	1.02	4.08	0.69	4.64	1.02	3.14	0.45	2.99	0.43	49	382	278		86	73	89	79	17	12	0.27	0.08
HS541	GEOROC	SANDEMAN, H. A.; HANMER, S.; DAVIS, W. J.; RYAN, J. J.; PETERSON, T. D., 2004	62	-94.5	IGNEOUS	VOLCANIC	BASALT	2700	10	49.3	0.56	14.9		10.4			0.14	9.02	10.76	1	0.04	0.04	3	1.6	4.6	0.68	3.6	1.23	0.52	1.9	0.35	2.2	0.49	1.5	0.22	1.5	0.22	40	220	430	49	140	63	90	30	14	16	0.08	0.09
HS58C	GEOROC	SANDEMAN, H. A.; HANMER, S.; DAVIS, W. J.; RYAN, J. J.; PETERSON, T. D., 2004	62	-94.5	IGNEOUS	VOLCANIC	ANDESITE	2700	10	54.9	0.78	15.6		9.1			0.18	7.37	6.71	3.7	0.41	0.29	1.3	25.02	61	7.91	30.02	5.01	1.41	4.01	0.54	3.11	0.58	1.6	0.25	1.61	0.27	25	150	202	30	107	89	18	120	14	67	0.36	0.37
BW491	GEOROC	SHIMIZU, K.; NAKAMURA, E.; MARUYAMA, S., 2005	-20.35	30.03	IGNEOUS	VOLCANIC	BASALT	2700	0	53.73	0.53	10.84				9.16	0.15	10.47	7.88	3.16	0.02	0.05	2.92	3.2	7.4	1	4.8	1.42	0.41	1.7	0.33	2.2	0.48	1.3	0.21	1.4	0.2								36		18	0.104	0.32
BW492	GEOROC	SHIMIZU, K.; NAKAMURA, E.; MARUYAMA, S., 2005	-20.35	30.03	IGNEOUS	VOLCANIC	BASALT	2700	0	53.55	0.55	11.79				9.37	0.13	10.55	7.22	3.06	0.03	0.049	2.57	3.2	7.2	0.96	4.72	1.38	0.48	1.7	0.31	2	0.45	1.2	0.19	1.3	0.19								38		29	0.12	0.3
BW495	GEOROC	SHIMIZU, K.; NAKAMURA, E.; MARUYAMA, S., 2005	-20.35	30.03	IGNEOUS	VOLCANIC	BASALT	2700	0	53.14	0.55	11.51				9.25	0.14	11.26	7.16	3.04	0.03	0.051	2.84	3.1	7.2	0.97	4.47	1.36	0.45	1.7	0.32	2.2	0.47	1.3	0.2	1.4	0.2								33		34	0.11	0.34
BX108	GEOROC	SHIMIZU, K.; NAKAMURA, E.; MARUYAMA, S., 2005	-20.35	30.03	IGNEOUS	VOLCANIC	BASALT	2700	0	51.04	0.55	11.27				9.95	0.18	11.48	8.54	2.84	0.023	0.051	2.59	3	7	0.93	4.45	1.33	0.5	1.7	0.32	2.1	0.47	1.3	0.21	1.4	0.2								34		20	0.1	0.33
BX119	GEOROC	SHIMIZU, K.; NAKAMURA, E.; MARUYAMA, S., 2005	-20.33	30.03	IGNEOUS	VOLCANIC	BASALT	2700	0	51.8	0.56	13.81				9.28	0.16	8.26	10.85	1.68	0.088	0.044	2.32	1.2	3.6	0.57	3.12	1.08	0.49	1.5	0.29	1.9	0.44	1.2	0.19	1.3	0.19								23		20	0.062	0.044
BX123	GEOROC	SHIMIZU, K.; NAKAMURA, E.; MARUYAMA, S., 2005	-20.33	30.03	IGNEOUS	VOLCANIC	BASALT	2700	0	52.36	0.55	13.21				9.42	0.18	8.01	10.78	2.24	0.035	0.043	2.18	1.3	3.7	0.6	3.21	1.13	0.45	1.6	0.3	2.1	0.47	1.3	0.2	1.4	0.21								23		46	0.065	0.044
BX129	GEOROC	SHIMIZU, K.; NAKAMURA, E.; MARUYAMA, S., 2005	-20.33	30.03	IGNEOUS	VOLCANIC	BASALT	2700	0	53.21	0.53	13.3				9.04	0.16	8.59	8.96	1.86	0.08	0.054	3.33	3.2	7.1	0.9	4.15	1.28	0.56	1.8	0.35	2.5	0.55	1.5	0.24	1.7	0.25								30		20	0.1	0.33
BX153	GEOROC	SHIMIZU, K.; NAKAMURA, E.; MARUYAMA, S., 2005	-20.33	30.03	IGNEOUS	VOLCANIC	BASALT	2700	0	50.25	1.25	13.79				11.82	0.26	6.2	10.85	1.68	0.1	0.11	2.2	3.5	10	1.6	8.19	2.68	1.04	3.7	0.7	4.7	1	2.9	0.44	3.1	0.45								66		29	0.19	0.09
BX211	GEOROC	SHIMIZU, K.; NAKAMURA, E.; MARUYAMA, S., 2005	-20.33	30.03	IGNEOUS	VOLCANIC	BASALT	2700	0	52.59	0.62	14.33				9.82	0.19	7.52	6.58	2.18	1.73	0.069	3.17	5.6	12	1.5	6.5	1.84	0.61	2.4	0.45	3.1	0.7	1.9	0.3	2.1	0.31								52		597	0.15	0.6
BX229	GEOROC	SHIMIZU, K.; NAKAMURA, E.; MARUYAMA, S., 2005	-20.33	30.03	IGNEOUS	VOLCANIC	BASALT	2700	0	52.17	0.53	12.97				7.93	0.17	9.72	10.29	1.57	0.01	0.054	3.93	2.4	5.3	0.7	3.44	1.16	0.58	1.7	0.33	2.3	0.54	1.5	0.24	1.6	0.24								30		20	0.071	0.22
BX235	GEOROC	SHIMIZU, K.; NAKAMURA, E.; MARUYAMA, S., 2005	-20.33	30.03	IGNEOUS	VOLCANIC	BASALT	2700	0	52.19	0.53	14.24				8.29	0.14	9	7.51	3.95	0.015	0.049	3.36	2.2	5.1	0.68	3.34	1.17	0.49	1.7	0.35	2.5	0.56	1.5	0.25	1.7	0.25								24		24	0.064	0.19
BX238	GEOROC	SHIMIZU, K.; NAKAMURA, E.; MARUYAMA, S., 2005	-20.33	30.03	IGNEOUS	VOLCANIC	BASALT	2700	0	48.12	0.73	14.16				10.96	0.19	8.28	11.91	1.83	0.062	0.059	2.55	2	5.6	0.87	4.6	1.58	0.61	2.2	0.42	2.9	0.64	1.8	0.27	1.9	0.28								32		26	0.089	0.054
BX240	GEOROC	SHIMIZU, K.; NAKAMURA, E.; MARUYAMA, S., 2005	-20.33	30.03	IGNEOUS	VOLCANIC	BASALT	2700	0	47.73	0.75	14.67				11.09	0.19	8.43	11.73	1.28	0.15	0.064	2.64	2.1	5.9	0.94	4.83	1.64	0.68	2.3	0.44	2.9	0.65	1.8	0.28	2	0.29								35		33	0.1	0.053
BX248	GEOROC	SHIMIZU, K.; NAKAMURA, E.; MARUYAMA, S., 2005	-20.33	30.03	IGNEOUS	VOLCANIC	BASALT	2700	0	48.72	0.73	14.26				10.9	0.19	7.48	13.46	0.82	0.093	0.059	2.3	1.9	5.5	0.84	4.62	1.57	0.66	2.1	0.41	2.8	0.61	1.7	0.26	1.9	0.27								35		18	0.09	0.053
BX252	GEOROC	SHIMIZU, K.; NAKAMURA, E.; MARUYAMA, S., 2005	-20.33	30.03	IGNEOUS	VOLCANIC	BASALT	2700	0	48.56	0.74	14.48				10.99	0.19	8.36	11.66	1.67	0.046	0.059	2.07	2	5.6	0.92	4.85	1.65	0.73	2.3	0.44	2.9	0.65	1.8	0.28	2	0.28								33		18	0.1	0.055
BX255	GEOROC	SHIMIZU, K.; NAKAMURA, E.; MARUYAMA, S., 2005	-20.33	30.03	IGNEOUS	VOLCANIC	BASALT	2700	0	48.5	0.74	14.52				10.73	0.18	8.42	11.98	1.16	0.18	0.059	2.41	1.9	5.5	0.84	4.69	1.61	0.65	2.1	0.41	2.8	0.63	1.7	0.27	1.8	0.26								31		30	0.094	0.052
331/477	GEOROC	SUN, SHEN-SU; NESBITT, R. W.; MCCULLOCH, M. T., 1989	-31.2	121.67	IGNEOUS	VOLCANIC	BASALT	2700	0	53.08	0.63	12.88		10.95			0.18	9.54	10.67	1.88	0.36	0.06	1.52	7.86	17		8.32	2.02	0.662			2.64		1.69		1.66	0.248	39	200	836	58	177			63		155
331/626	GEOROC	SUN, SHEN-SU; NESBITT, R. W.; MCCULLOCH, M. T., 1989	-30.8	121.5	IGNEOUS	VOLCANIC	BASALT	2700	0	52.95	0.63	12.92		11.22			0.2	10.56	9.1	2.11	0.41	0.08	1.95	9.66	19.6		8.49	2.043	0.663	2.26		2.45		1.55		1.51	0.233	43	208	910	68	211			63		134
331/628	GEOROC	SUN, SHEN-SU; NESBITT, R. W.; MCCULLOCH, M. T., 1989	-30.8	121.5	IGNEOUS	VOLCANIC	BASALT	2700	0	51.66	0.59	11.94		11.49			0.17	13.22	7.91	1.73	0.94	0.07	2.65	8.34	16.6		8.2	1.83	0.507	2.08		2.26		1.44		1.41		39	193	1460	72	341			57		145
K120	GEOROC	UJIKE, O.; GOODWIN, A. M.; SHIBATA, T., 2007	49.2	-94.6	IGNEOUS	VOLCANIC	BASALT	2700	0	51.58	0.92	12.92				11.32	0.15	8.37	10.84	2.42	1.49			14.3	33		22.2	4.71	1.5		0.6					1.88	0.31	34.6	304	358	47	105			78		190	0.4	0.5
K146	GEOROC	UJIKE, O.; GOODWIN, A. M.; SHIBATA, T., 2007	49.2	-94.6	IGNEOUS	VOLCANIC	ANDESITE	2700	0	53.61	0.86	16.4				10.86	0.2	8.82	5.05	3.18	0.78	0.25		4.47	10.1		7.21	2.38	0.93		0.6					2.8	0.42	42.8	336	269	54	106			75		501	0.2	0.1
K15	GEOROC	UJIKE, O.; GOODWIN, A. M.; SHIBATA, T., 2007	49.2	-94.6	IGNEOUS	VOLCANIC	ANDESITE	2700	0	53.52	1.04	17.25				9.79	0.23	4.96	8.67	3.29	0.95	0.3		19.7	48.1		26.5	5.06	1.6		0.63					2.66	0.43	30.8	264	44	41	55			110		365	0.7	0.7
K153	GEOROC	UJIKE, O.; GOODWIN, A. M.; SHIBATA, T., 2007	49.2	-94.6	IGNEOUS	VOLCANIC	THOLEIITE	2700	0	52.42	0.57	13.71				9.79	0.17	9.72	10.85	2.59	0.01	0.17		3.18	6.41		4.1	1.66	0.87		0.43					1.69	0.26	38.4	249	704	52	228			35		77	0.3	0.2
K159	GEOROC	UJIKE, O.; GOODWIN, A. M.; SHIBATA, T., 2007	49.2	-94.6	IGNEOUS	VOLCANIC	THOLEIITE	2700	0	51.37	0.63	14.87				9.41	0.18	6.81	13.63	2.98	0.01	0.11		5.27	11.1		7.99	1.93	1.06		0.45					1.78	0.23	44	251	305	48	114			38		69	0.2	0.2
K170	GEOROC	UJIKE, O.; GOODWIN, A. M.; SHIBATA, T., 2007	49.2	-94.6	IGNEOUS	VOLCANIC	THOLEIITE	2700	0	50.34	0.58	12.71				11.06	0.18	11.39	11.79	1.56	0.26	0.13		3.12	8.45		5.05	1.71	0.57		0.39					1.63	0.22	40.3	258	741	60	240			41		125	0.2	0.2
K34	GEOROC	UJIKE, O.; GOODWIN, A. M.; SHIBATA, T., 2007	49.2	-94.6	IGNEOUS	VOLCANIC	ANDESITE	2700	0	53.72	0.46	13.82				13.83	0.59	5.67	10.13	1.44	0.19	0.15		3.19	4.31		4.51	1.22	0.45		0.31					1.33	0.23	44.7	286	902	51	250			29		170		0.3
K40	GEOROC	UJIKE, O.; GOODWIN, A. M.; SHIBATA, T., 2007	49.2	-94.6	IGNEOUS	VOLCANIC	THOLEIITE	2700	0	50.87	0.51	12.72				11.75	0.17	11.66	10.59	1.48		0.25		2.46	3.18		2.92	1.17	0.75		0.39					1.72	0.21	37.1	237	845	57	211			28		74	0.2	0.3
K41	GEOROC	UJIKE, O.; GOODWIN, A. M.; SHIBATA, T., 2007	49.2	-94.6	IGNEOUS	VOLCANIC	SHOSHONITE	2700	0	53.08	0.68	14.59				8.19	0.12	7.4	9.31	2.93	2.97	0.74		57.1	121		55.9	8.49	2.67		0.83					1.81	0.22	27.7	210	151	35	54			122		1146	0.5	2.2
T0824-1	GEOROC	WANG, WEI; YANG, ENXIU; ZHAI, MINGGUO; WANG, S.; SANTOSH, M.; DU, LILIN; XIE, H. Q.; LV, BIN; WAN, YUSHENG, 2013	36.43	117.28	IGNEOUS	VOLCANIC	BASALT	2700	0	46.4	2	12.8	4.4		11.2		0.3	4.4	10.7	2.8	0.2	0.2	5.2	14.4	34.2	4.71	21.1	5.32	1.77	5.58	0.85	4.81	0.9	2.48	0.32	1.93	0.28	31		59					131		46	0.8	0.25
T0824-2	GEOROC	WANG, WEI; YANG, ENXIU; ZHAI, MINGGUO; WANG, S.; SANTOSH, M.; DU, LILIN; XIE, H. Q.; LV, BIN; WAN, YUSHENG, 2013	36.43	117.28	IGNEOUS	VOLCANIC	BASALT	2700	0	48	1.6	11.4	3.6		10.9		0.2	5.4	9.9	2	0.3	0.2	6.1	15.3	36.4	4.81	21.8	5.28	1.53	5.24	0.8	4.56	0.88	2.41	0.33	1.98	0.29	34		165					131		8	0.8	0.28
T0825-1	GEOROC	WANG, WEI; YANG, ENXIU; ZHAI, MINGGUO; WANG, S.; SANTOSH, M.; DU, LILIN; XIE, H. Q.; LV, BIN; WAN, YUSHENG, 2013	36.43	117.28	IGNEOUS	VOLCANIC	THOLEIITE	2700	0	50.1	1	13.3	3.7		9.5		0.2	6.4	9.1	2.4	0.1	0.1	3.4	4.19	11.2	1.67	8.64	2.78	0.97	3.85	0.71	4.55	1.02	2.94	0.43	2.87	0.44	47		126					74		58	0.4	0.09
T0826-1	GEOROC	WANG, WEI; YANG, ENXIU; ZHAI, MINGGUO; WANG, S.; SANTOSH, M.; DU, LILIN; XIE, H. Q.; LV, BIN; WAN, YUSHENG, 2013	36.43	117.28	IGNEOUS	VOLCANIC	THOLEIITE	2700	0	50.5	0.9	14.2	3		8.6		0.2	6.5	11.8	1.7	0.2	0.1	2.4	3.42	8.85	1.38	6.72	2.16	0.82	3.17	0.58	3.9	0.85	2.47	0.37	2.44	0.38	46		205					60		32	0.3	0.06
T0826-3	GEOROC	WANG, WEI; YANG, ENXIU; ZHAI, MINGGUO; WANG, S.; SANTOSH, M.; DU, LILIN; XIE, H. Q.; LV, BIN; WAN, YUSHENG, 2013	36.43	117.28	IGNEOUS	VOLCANIC	THOLEIITE	2700	0	49.7	0.9	14.1	3		8.9		0.2	7.5	10.3	1.9	0.1	0.1	3.9	3.22	8.5	1.3	6.68	2.35	0.84	3.2	0.59	3.97	0.85	2.51	0.38	2.43	0.37	46		204					63		27	0.3	0.06
T0826-4	GEOROC	WANG, WEI; YANG, ENXIU; ZHAI, MINGGUO; WANG, S.; SANTOSH, M.; DU, LILIN; XIE, H. Q.; LV, BIN; WAN, YUSHENG, 2013	36.43	117.28	IGNEOUS	VOLCANIC	THOLEIITE	2700	0	50.5	0.9	13.8	3.5		8.2		0.2	6.8	11.8	1.7	0.1	0.1	2.1	2.79	7.47	1.15	5.93	2.12	0.6	2.93	0.54	3.56	0.8	2.29	0.34	2.21	0.33	47		205					63		19	0.4	0.05
T0826-5	GEOROC	WANG, WEI; YANG, ENXIU; ZHAI, MINGGUO; WANG, S.; SANTOSH, M.; DU, LILIN; XIE, H. Q.; LV, BIN; WAN, YUSHENG, 2013	36.43	117.28	IGNEOUS	VOLCANIC	THOLEIITE	2700	0	50.4	0.9	14.8	2.7		8.1		0.2	7.2	11.1	2.4	0.1	0.1	2.2	3.24	8.52	1.31	6.84	2.31	0.84	3.31	0.6	3.8	0.86	2.54	0.37	2.42	0.35	47		204					62		32	0.3	0.07
T0826-6	GEOROC	WANG, WEI; YANG, ENXIU; ZHAI, MINGGUO; WANG, S.; SANTOSH, M.; DU, LILIN; XIE, H. Q.; LV, BIN; WAN, YUSHENG, 2013	36.43	117.28	IGNEOUS	VOLCANIC	THOLEIITE	2700	0	48.9	0.9	14.4	2.9		8.3		0.2	6	13.5	1.1	0.1	0.1	3.8	3.6	9.05	1.36	6.93	2.43	0.93	3.25	0.58	3.86	0.86	2.56	0.35	2.26	0.35	46		205					44		20	0.3	0.06
T0827-1	GEOROC	WANG, WEI; YANG, ENXIU; ZHAI, MINGGUO; WANG, S.; SANTOSH, M.; DU, LILIN; XIE, H. Q.; LV, BIN; WAN, YUSHENG, 2013	36.43	117.28	IGNEOUS	VOLCANIC	THOLEIITE	2700	0	50.6	0.9	14.2	3		8.9		0.2	6.5	11.3	2	0.2	0.1	2.1	2.93	7.63	1.21	6.18	2.06	0.77	2.91	0.53	3.57	0.78	2.28	0.32	2.01	0.32	49		119					56		24	0.3	0.06
T0829-3	GEOROC	WANG, WEI; YANG, ENXIU; ZHAI, MINGGUO; WANG, S.; SANTOSH, M.; DU, LILIN; XIE, H. Q.; LV, BIN; WAN, YUSHENG, 2013	36.43	117.28	IGNEOUS	VOLCANIC	BASALT	2700	0	49.3	2.1	13.1	4.2		11.4		0.2	5.2	9.1	2.9	0.3	0.2	1.3	14.3	34.3	4.82	22.3	5.68	1.83	5.77	0.89	4.96	0.97	2.58	0.34	2.15	0.31	32		55					145		102	0.8	0.28
T1011	GEOROC	WANG, WEI; YANG, ENXIU; ZHAI, MINGGUO; WANG, S.; SANTOSH, M.; DU, LILIN; XIE, H. Q.; LV, BIN; WAN, YUSHENG, 2013	36.43	117.28	IGNEOUS	VOLCANIC	BASALT	2700	0	46	1.6	10.2	6.4		6.1		0.2	3.6	14.7	1.7	0.1	0.1	9.8	11.74	24.83	3.7	16.21	4.31	1.4	4.37	0.72	4.15	0.85	2.24	0.33	2	0.29	26		54					101		49	0.6	0.27
T1015	GEOROC	WANG, WEI; YANG, ENXIU; ZHAI, MINGGUO; WANG, S.; SANTOSH, M.; DU, LILIN; XIE, H. Q.; LV, BIN; WAN, YUSHENG, 2013	36.43	117.28	IGNEOUS	VOLCANIC	THOLEIITE	2700	0	46.2	1.1	15.4	4		9.7		0.2	8	8.4	2.9	0.2	0.1	2.6	1.82	4.26	0.93	5.47	2.13	0.75	3.19	0.66	4.49	1	2.8	0.42	2.65	0.41	54		162					58		54	0.2	0.06
T1018	GEOROC	WANG, WEI; YANG, ENXIU; ZHAI, MINGGUO; WANG, S.; SANTOSH, M.; DU, LILIN; XIE, H. Q.; LV, BIN; WAN, YUSHENG, 2013	36.43	117.28	IGNEOUS	VOLCANIC	THOLEIITE	2700	0	49.6	1	14	5.9		8.8		0.2	8.1	7.3	1.7	0.1	0.1	3	2.73	7.29	1.18	6.32	2.18	0.87	3.08	0.59	4.14	0.9	2.6	0.4	2.56	0.38	51		167					55		17	0.2	0.1
T1019-1	GEOROC	WANG, WEI; YANG, ENXIU; ZHAI, MINGGUO; WANG, S.; SANTOSH, M.; DU, LILIN; XIE, H. Q.; LV, BIN; WAN, YUSHENG, 2013	36.43	117.28	IGNEOUS	VOLCANIC	THOLEIITE	2700	0	51	1	14.5	9		4.2		0.2	5.6	7.8	1.7	0.2	0.1	4	3.68	8.71	1.53	7.94	2.76	1.04	3.58	0.67	4.65	1.01	2.88	0.45	2.85	0.44	48		146					54		38	0.2	0.12
T1019-10	GEOROC	WANG, WEI; YANG, ENXIU; ZHAI, MINGGUO; WANG, S.; SANTOSH, M.; DU, LILIN; XIE, H. Q.; LV, BIN; WAN, YUSHENG, 2013	36.43	117.28	IGNEOUS	VOLCANIC	NOT-GIVEN	2700	0	51.5	1.1	15.6	5.3		9		0.2	7.4	1.3	2.7	0.1	0.1	5.3	1.99	5.87	1.03	5.82	2.13	0.83	3.07	0.62	4.48	0.97	2.83	0.45	2.83	0.39	50		183					62		15	0.2	0.07
T1019-2	GEOROC	WANG, WEI; YANG, ENXIU; ZHAI, MINGGUO; WANG, S.; SANTOSH, M.; DU, LILIN; XIE, H. Q.; LV, BIN; WAN, YUSHENG, 2013	36.43	117.28	IGNEOUS	VOLCANIC	THOLEIITE	2700	0	48.8	1	14.3	5.7		7.8		0.2	6.8	10	1.4	0.2	0.1	2.9	3.08	7.98	1.39	7.15	2.42	0.92	3.19	0.62	4.4	0.94	2.69	0.43	2.83	0.43	49		153					56		31	0.2	0.06
T1019-3	GEOROC	WANG, WEI; YANG, ENXIU; ZHAI, MINGGUO; WANG, S.; SANTOSH, M.; DU, LILIN; XIE, H. Q.; LV, BIN; WAN, YUSHENG, 2013	36.43	117.28	IGNEOUS	VOLCANIC	THOLEIITE	2700	0	49.8	0.9	13.9	4.3		7.8		0.2	6.8	10.9	2	0.2	0.1	2	3.32	8.77	1.42	7.25	2.31	0.88	3.1	0.58	3.93	0.85	2.44	0.4	2.57	0.38	45		152					54		29	0.2	0.08
T1019-4	GEOROC	WANG, WEI; YANG, ENXIU; ZHAI, MINGGUO; WANG, S.; SANTOSH, M.; DU, LILIN; XIE, H. Q.; LV, BIN; WAN, YUSHENG, 2013	36.43	117.28	IGNEOUS	VOLCANIC	THOLEIITE	2700	0	48.5	1	14.2	4.4		8.2		0.2	6.9	10.6	2.3	0.1	0.1	1.9	3.07	8.02	1.34	6.88	2.31	0.85	3.07	0.58	3.96	0.87	2.54	0.4	2.65	0.39	48		160					56		22	0.2	0.08
T1019-5	GEOROC	WANG, WEI; YANG, ENXIU; ZHAI, MINGGUO; WANG, S.; SANTOSH, M.; DU, LILIN; XIE, H. Q.; LV, BIN; WAN, YUSHENG, 2013	36.43	117.28	IGNEOUS	VOLCANIC	THOLEIITE	2700	0	47.4	1.3	14.6	5.8		8.2		0.2	9	8.4	2	0.1	0.1	2.1	2.44	6.64	1.11	5.97	2.21	0.89	3.6	0.76	5.41	1.18	3.37	0.53	3.36	0.46	49		174					71		15	0.2	0.11
T1019-6	GEOROC	WANG, WEI; YANG, ENXIU; ZHAI, MINGGUO; WANG, S.; SANTOSH, M.; DU, LILIN; XIE, H. Q.; LV, BIN; WAN, YUSHENG, 2013	36.43	117.28	IGNEOUS	VOLCANIC	NOT-GIVEN	2700	0	51.4	1.1	15.4	12.4		3.1		0.2	6.2	1.2	2.1	0.1	0.1	6.6	3.68	8.23	1.46	7.7	2.35	0.74	2.93	0.54	3.62	0.78	2.29	0.35	2.29	0.36	48		166					59		35	0.2	0.29
T1019-7	GEOROC	WANG, WEI; YANG, ENXIU; ZHAI, MINGGUO; WANG, S.; SANTOSH, M.; DU, LILIN; XIE, H. Q.; LV, BIN; WAN, YUSHENG, 2013	36.43	117.28	IGNEOUS	VOLCANIC	NOT-GIVEN	2700	0	54.8	0.9	14.3	11.4		2.5		0.2	5.5	1.8	1.8	0.2	0.1	6.3	3.01	8.03	1.28	6.75	2.31	0.86	2.89	0.55	3.67	0.83	2.34	0.38	2.44	0.38	44		158					51		38	0.2	0.22
T1019-8	GEOROC	WANG, WEI; YANG, ENXIU; ZHAI, MINGGUO; WANG, S.; SANTOSH, M.; DU, LILIN; XIE, H. Q.; LV, BIN; WAN, YUSHENG, 2013	36.43	117.28	IGNEOUS	VOLCANIC	NOT-GIVEN	2700	0	51.9	1.2	14.9	14.4		1.5		0.2	5.8	1.8	1.5	0.4		7.1	3.75	13.44	1.59	8.46	2.62	0.75	3.2	0.6	3.82	0.78	2.24	0.35	2.36	0.36	51		181					66		49	0.2	0.35
T1019-9	GEOROC	WANG, WEI; YANG, ENXIU; ZHAI, MINGGUO; WANG, S.; SANTOSH, M.; DU, LILIN; XIE, H. Q.; LV, BIN; WAN, YUSHENG, 2013	36.43	117.28	IGNEOUS	VOLCANIC	NOT-GIVEN	2700	0	50.7	1.1	15.7	7.8		6.8		0.2	6.9	1.9	2.3	0.1	0.1	6.1	2.99	7.9	1.34	7.04	2.51	1	3.46	0.66	4.55	0.99	2.85	0.46	2.97	0.44	52		166					63		17	0.2	0.09
T1021	GEOROC	WANG, WEI; YANG, ENXIU; ZHAI, MINGGUO; WANG, S.; SANTOSH, M.; DU, LILIN; XIE, H. Q.; LV, BIN; WAN, YUSHENG, 2013	36.43	117.28	IGNEOUS	VOLCANIC	NOT-GIVEN	2700	0	50.6	1.1	14.4	10.1		5.5		0.2	7.4	2.9	1.2	0.2	0.1	6.2	3.81	6.45	1.46	7.56	2.45	0.7	2.91	0.61	4.16	0.9	2.65	0.43	2.86	0.43	52		168					63		75	0.2	0.13
T1023	GEOROC	WANG, WEI; YANG, ENXIU; ZHAI, MINGGUO; WANG, S.; SANTOSH, M.; DU, LILIN; XIE, H. Q.; LV, BIN; WAN, YUSHENG, 2013	36.43	117.28	IGNEOUS	VOLCANIC	THOLEIITE	2700	0	51.2	0.8	12.1	5.1		5.6		0.2	6.9	8.2	2.3		0.1	7.1	2.79	5.26	1.28	7.03	2.17	0.75	2.67	0.51	3.41	0.69	1.91	0.31	2.06	0.32	37		146					49		23	0.2	0.07
T1025	GEOROC	WANG, WEI; YANG, ENXIU; ZHAI, MINGGUO; WANG, S.; SANTOSH, M.; DU, LILIN; XIE, H. Q.; LV, BIN; WAN, YUSHENG, 2013	36.43	117.28	IGNEOUS	VOLCANIC	BASALT	2700	0	45.3	2.2	12.6	6.5		10		0.2	4.6	7.2	2.2	0.1	0.2	8.7	14.93	34.69	5.01	21.78	5.6	1.64	4.97	0.8	4.47	0.82	2.16	0.33	2.02	0.29	28		65					121		57	0.8	0.25
V17-2	GEOROC	WYMAN, D. A., 1999	48.12	-77.77	IGNEOUS	VOLCANIC	BASALT	2700	0	49.7	0.83	13.7		13.3			0.23	7.3	10.39	0.7	2.4	0.06	0.9	3.66	8.87	1.27	6.64	2.15	0.77	3.01	0.49	3.5	0.78	2.47	0.37	2.36	0.37	49	328	153	47	80			49		189	0.15	0.07
V17-3	GEOROC	WYMAN, D. A., 1999	48.12	-77.77	IGNEOUS	VOLCANIC	BASALT	2700	0	51.7	0.86	17		8.3			0.17	7.6	7.65	0.4	4.2	0.13	1.9	8.1	20.05	2.56	12.5	2.7	0.81	3.14	0.43	2.61	0.54	1.69	0.26	1.73	0.28	38	261	396	32	147			103		219	0.24	0.27
V44-2	GEOROC	WYMAN, D. A., 1999	48.12	-77.77	IGNEOUS	VOLCANIC	THOLEIITE	2700	0	49.1	0.47	17.7		9.9			0.16	8.4	11.7	1.2		0.03	2.5	1	2.49	0.37	2.08	0.61	0.26	0.88	0.16	1.26	0.32	1.27	0.21	1.58	0.26	40	255	135	42	75			23		7	0.06	0.06
V44-3	GEOROC	WYMAN, D. A., 1999	48.12	-77.77	IGNEOUS	VOLCANIC	THOLEIITE	2700	0	50.34	0.46	18.04		11.85			0.18	10.91	6.46	0.05	1.82	0.03	4.65	1.34	3.39	0.44	2.27	0.66	0.38	0.94	0.18	1.62	0.37	1.36	0.25	1.78	0.3	46	207	98	49	80			22		32	0.06	0.15
V47	GEOROC	WYMAN, D. A., 1999	48.12	-77.77	IGNEOUS	VOLCANIC	THOLEIITE	2700	0	47.8	0.27	17.5		10			0.19	11.4	8.29	2.4	0.8	0.02	2.25	1.54	3.41	0.48	2.37	0.65	0.31	1.06	0.18	1.61	0.38	1.35	0.22	1.6	0.25	66	165	179	37	295			19		161	0.05	0.05
V5-1	GEOROC	WYMAN, D. A., 1999	48.12	-77.77	IGNEOUS	VOLCANIC	THOLEIITE	2700	0	54.45	0.94	13		15.44			0.25	4.75	6.28	0.22	4.24	0.09	1.55	3.32	8.96	1.4	7.63	2.39	0.68	4.57	0.72	6.63	1.53	4.81	0.85	5.74	0.89	92	454	134	58	57			68		90	0.2	0.09
V53	GEOROC	WYMAN, D. A., 1999	48.12	-77.77	IGNEOUS	VOLCANIC	THOLEIITE	2700	0	47.9	0.44	18.8		10.1			0.19	9.3	10.7	2.1	0.2	0.03	2.7	1.66	4.32	0.61	3.12	0.95	0.39	1.3	0.22	1.79	0.43	1.49	0.26	1.91	0.28	40	151	219	107	231			24		39	0.08	0.03
V54B	GEOROC	WYMAN, D. A., 1999	48.12	-77.77	IGNEOUS	VOLCANIC	THOLEIITE	2700	0	50.4	0.99	13.8		16.9			0.27	4.7	6.89	4.3	0.2	0.1	0.4	4.42	12.1	1.65	8.39	2.67	0.79	3.78	0.77	6.31	1.57	5.07	0.86	5.99	0.96	75	347	331	50	67			77		188	0.21	0.1
VA	GEOROC	WYMAN, D. A., 1999	48.12	-77.77	IGNEOUS	VOLCANIC	THOLEIITE	2700	0	50.9	0.97	13.6		17.4			0.3	6.3	6.36	3.3		0.08	2.25	4.02	11.5	1.65	7.88	2.49	0.44	3.53	0.66	5.36	1.31	4.75	0.76	5.29	0.87	82	416	154	52	73			70		16	0.17	0.09
VB-1	GEOROC	WYMAN, D. A., 1999	48.12	-77.77	IGNEOUS	VOLCANIC	THOLEIITE	2700	0	53.3	0.89	13.4		14.5			0.25	4.9	8.46	3.2	0.1	0.09	1.55	8.38	19.5	2.57	12.6	3.69	1.59	5.15	0.92	7.1	1.75	5.6	0.88	6.32	0.99	84	428	38	37	81			58		18	0.17	0.14
KC-506-B	GEOROC	WYMAN, D. A., 2000	48.7	-81.4	IGNEOUS	VOLCANIC	THOLEIITE	2700	0	52.55	0.31	15.94	9.78				0.2	12.8	3.79	4.6		0.04	5.04	1.22	3.32	0.53	2.34	0.69	0.4	1.18	0.22	1.91	0.48	1.66	0.26	1.89	0.29	49	175	668	65	303			21		20	0.06	0.09
KC533G	GEOROC	WYMAN, D. A., 2000	48.7	-81.4	IGNEOUS	VOLCANIC	THOLEIITE	2700	0	54.07	0.4	21.76	6.2				0.22	3.92	9.27	3.24	0.89	0.03	4.77	1.73	4.45	0.63	3.08	1.12	0.4	1.45	0.27	2.1	0.53	1.57	0.25	1.78	0.26	55	216	1182	85	418			25		207	0.08	0.06
WL41	GEOROC	WYMAN, D. A., 2000	48	-78.5	IGNEOUS	VOLCANIC	ANDESITE	2700	0	53.61	1.25	16.1	11.64				0.17	5.03	8.6	2.78	0.66	0.16	2.88	13.97	32.48	4.38	16.68	3.89	1.29	4.31	0.68	4.37	0.85	2.59	0.39	2.41	0.37	33	302	97	31	45			119		178	0.51	0.44
BY-2	GEOROC	WYMAN, D. A.; KERRICH, R., 2009	48.47	-81.33	IGNEOUS	VOLCANIC	BASALT	2700	0	48.42	1.95	16.7		15.65			0.37	3.83	10.57	1.61	0.54	0.37	3.6	9.1	26.3	4.18	18.29	5.15	1.83	6.18	0.97	6.49	1.31	3.62	0.55	3.74	0.52	41	247	279	59	160	140	90	160.5		232	0.66	0.16
BY-3	GEOROC	WYMAN, D. A.; KERRICH, R., 2009	48.47	-81.33	IGNEOUS	VOLCANIC	BASALT	2700	0	53.05	1.72	14.24		14.24			0.26	3.86	9.3	2.93	0.24	0.15	2	5.38	15.4	2.54	11.98	3.93	1.29	5.19	0.9	6.25	1.29	3.84	0.57	3.67	0.57	53	454	139	55	75	133	134	99.2		92	0.37	0.26
BY-4	GEOROC	WYMAN, D. A.; KERRICH, R., 2009	48.47	-81.33	IGNEOUS	VOLCANIC	BASALT	2700	0	49.07	1.89	19.33		13.53			0.27	3.46	7.42	4.61	0.28	0.16	4.55	8.09	22.4	3.28	14.07	4.17	1.57	5.24	0.84	5.43	1.11	3.05	0.46	2.94	0.43	31	372	223	69	147	54	153	93.8		51	0.35	0.12
BY-5	GEOROC	WYMAN, D. A.; KERRICH, R., 2009	48.47	-81.33	IGNEOUS	VOLCANIC	BASALT	2700	0	54.43	0.74	14.66		9.23			0.19	6.97	10.01	3.23	0.45	0.08	1.3	4.55	11.65	1.74	7.09	1.98	0.76	2.57	0.42	2.69	0.56	1.57	0.24	1.53	0.23	34	229	311	40	76	67	46	56.7		119	0.21	0.15
DDS 01	GEOROC	WYMAN, D. A.; KERRICH, R., 2009	48.47	-81.33	IGNEOUS	VOLCANIC	BASALT	2700	0	46.79	2.43	12.67		19			0.23	5.19	10.42	2.81	0.41	0.05	1.8	3.35	9.6	1.58	7.19	2.34	0.98	2.96	0.44	2.83	0.57	1.64	0.24	1.47	0.21	35	489	97	71	3	69	38	42.8		148	0.21	0.07
DU-2	GEOROC	WYMAN, D. A.; KERRICH, R., 2009	48.47	-81.33	IGNEOUS	VOLCANIC	BASALT	2700	0	50.77	0.66	12.74		13.77			0.24	10.1	8.52	2.39	0.74	0.06	2.65	1.56	4.48	0.76	3.68	1.44	0.51	2.04	0.35	2.53	0.52	1.63	0.25	1.6	0.25	47	266	645	66	129	81	88	37.3		132	0.17	0.05
DU-2B	GEOROC	WYMAN, D. A.; KERRICH, R., 2009	48.47	-81.33	IGNEOUS	VOLCANIC	BASALT	2700	0	50.33	0.62	12.35		12.25			0.22	9.18	12.45	2.37	0.19	0.05	2.2	1.41	4.26	0.72	3.63	1.38	0.6	2.17	0.35	2.5	0.53	1.57	0.25	1.6	0.26	44	261	585	58	116	90	57	32.8		50	0.15	0.04
DUN-01	GEOROC	WYMAN, D. A.; KERRICH, R., 2009	48.47	-81.33	IGNEOUS	VOLCANIC	BASALT	2700	0	51.98	0.73	12.3		11.78			0.21	10.64	8.62	3.61	0.05	0.07	2.6	2.32	6.67	1.08	5.11	1.8	0.67	2.62	0.44	3.19	0.67	2.12	0.33	2.05	0.31	47	288	739	51	193	53	50	49.3		97	0.18	0.06
DUN-02	GEOROC	WYMAN, D. A.; KERRICH, R., 2009	48.47	-81.33	IGNEOUS	VOLCANIC	BASALT	2700	0	47.48	0.36	6.8		12.49			0.18	25.97	6.46	0.22		0.04	6.6	0.63	1.93	0.38	1.66	0.77	0.34	1.33	0.21	1.51	0.32	0.96	0.14	0.99	0.15	34	200	2618	110	1538	83	56	17.6		6	0.11	0.02
DUN-05	GEOROC	WYMAN, D. A.; KERRICH, R., 2009	48.47	-81.33	IGNEOUS	VOLCANIC	BASALT	2700	0	46.49	0.51	10.05		12.91			0.21	14.15	15.29	0.32	0.01	0.05	3.4	1.32	3.89	0.65	3.08	1.22	0.47	1.77	0.33	2.2	0.49	1.46	0.23	1.47	0.22	45	254	918	51	232	67	45	31.2		11	0.13	0.05
KC-519A	GEOROC	WYMAN, D. A.; KERRICH, R., 2009	48.47	-81.33	IGNEOUS	VOLCANIC	BASALT	2700	0	45.52	1.33	14.87		14.98			0.52	5.09	14.2	3.28	0.1	0.11	13.12	6.3	15.35	1.92	9.96	3.06	1.21	4.02	0.72	4.77	1.03	2.93	0.46	3.04	0.43	17	371	211	48	60	90	56	90		47	0.29	0.14
KC-519B	GEOROC	WYMAN, D. A.; KERRICH, R., 2009	48.47	-81.33	IGNEOUS	VOLCANIC	BASALT	2700	0	47.88	0.84	16.79		12.36			0.18	8.32	11.22	2.31	0.05	0.05	2.46	2.48	6.71	1.05	5.56	1.91	0.74	2.27	0.42	2.89	0.62	1.81	0.28	1.82	0.28	44	229	205	52	149	65	86	35		32	0.14	0.05
MO1	GEOROC	WYMAN, D. A.; KERRICH, R., 2009	48.47	-81.33	IGNEOUS	VOLCANIC	BASALT	2700	0	49.45	1.39	12.62		16.41			0.26	5.95	10.08	2.2	0.37	0.11	2.5	3.81	11.2	1.76	9.38	3.07	1.06	3.91	0.76	5.01	1.14	3.12	0.48	3.17	0.46	47	373	107	58	57	123	128	80.5		87	0.26	0.08
MO2	GEOROC	WYMAN, D. A.; KERRICH, R., 2009	48.47	-81.33	IGNEOUS	VOLCANIC	BASALT	2700	0	48.06	1.04	13.86		14.38			0.23	6.92	12.22	2.03	0.03	0.08	2.6	3.45	9.15	1.59	8.56	2.88	0.94	3.86	0.62	4.09	0.87	2.53	0.4	2.63	0.47	60	329	181	56	95	96	135	58.1		20	0.22	0.09
MO3	GEOROC	WYMAN, D. A.; KERRICH, R., 2009	48.47	-81.33	IGNEOUS	VOLCANIC	BASALT	2700	0	51.71	1.56	12.98		15.94			0.28	5.03	7.59	4.51	0.11	0.14	2.15	2.57	7.51	1.23	6.71	2.38	0.88	3.33	0.65	4.38	0.98	2.77	0.41	2.87	0.38	51	341	202	59	69	96	135	59.3		77	0.15	0.06
MO5	GEOROC	WYMAN, D. A.; KERRICH, R., 2009	48.47	-81.33	IGNEOUS	VOLCANIC	BASALT	2700	0	50.78	1.04	14.55		13.93			0.27	6.28	8.9	3.88	0.28	0.08	2.3	6.69	20.11	3.18	15.46	4.54	1.39	5.29	0.81	5.2	1.04	2.92	0.41	2.71	0.42	28	282	42	48	56	138	166	114.4		32	0.45	0.18
MO7	GEOROC	WYMAN, D. A.; KERRICH, R., 2009	48.47	-81.33	IGNEOUS	VOLCANIC	BASALT	2700	0	49.43	1.75	14.15		16.81			0.32	4.7	9.29	2.9	0.49	0.18	8.35	4.64	13.11	2.11	11.05	3.94	1.29	5.47	0.88	6.23	1.3	3.87	0.56	3.92	0.56	52	406	164	63	88	134	115	97.8		128	0.37	0.1
MO8	GEOROC	WYMAN, D. A.; KERRICH, R., 2009	48.47	-81.33	IGNEOUS	VOLCANIC	BASALT	2700	0	50.42	1.51	13		16.67			0.17	5.83	8.02	4.13	0.1	0.15	2.8	7.57	19.94	2.96	14.49	4.27	1.49	5.06	0.76	5.03	0.99	2.77	0.43	2.67	0.41	27	285	126	66	84	101	38	101.8		26	0.42	0.2
WI-4	GEOROC	WYMAN, D. A.; KERRICH, R., 2009	48.47	-81.33	IGNEOUS	VOLCANIC	BASALT	2700	0	48.17	2.81	12.67		24.36			0.3	9.03	2.02	0.31		0.34	6.05	8.19	21.79	3.27	16.13	4.63	1.48	5.44	0.86	5.7	1.21	3.63	0.59	3.73	0.66	43	333	103	43	44	619	19	166.2		5	0.63	0.18
WL-L	GEOROC	WYMAN, D. A.; KERRICH, R., 2009	48.47	-81.33	IGNEOUS	VOLCANIC	BASALT	2700	0	48.44	2.09	13.08		19.06			0.25	5.76	9.47	1.52	0.1	0.22	9.35	7.99	21.18	3.17	14.94	4.51	1.58	5.64	0.9	6.18	1.28	3.76	0.55	3.65	0.53	39	343	169	60	100	118	10	118.9		39	0.49	0.13
T10	GEOROC	XIE, QIANLI; KERRICH, R., 1994	48.47	-81.4	IGNEOUS	VOLCANIC	BASALT	2700	0	48.7	0.543	8.26		12.2			0.22	16.4	8.3	1.46	0.02	0.04	5.17																209	1875		589
T12	GEOROC	XIE, QIANLI; KERRICH, R., 1994	48.47	-81.4	IGNEOUS	VOLCANIC	BASALT	2700	0	45.9	0.485	6.87		12.4			0.21	20.5	8.28	0.01	0.01	0.04	3.3																172	2290		722
B-6	GEOROC	XIE, QIANLI; KERRICH, R.; FAN, J., 1993	47.9	-80	IGNEOUS	VOLCANIC	THOLEIITE	2700	0	51.2	0.8	15.4		16.7			0.27	2.17	6.04	5.28	0.41	0.2	1.1	31.29	69.05	8.9	37.42	7.41	2.31	6.97	1	6.36	1.21	3.41	0.5	3.03	0.45	6.02							141.2
T4	GEOROC	XIE, QIANLI; KERRICH, R.; FAN, J., 1993	48.47	-81.4	IGNEOUS	VOLCANIC	THOLEIITE	2700	0	54.7	1.41	15.2		10.9			0.21	4.63	6.74	3.61	0.23	0.13	2.7	4.28	11.44	1.87	9.97	3.36	1.01	3.77	0.77	5.59	1.3	3.87	0.63	4.04	0.99	50.59							89.54
T7	GEOROC	XIE, QIANLI; KERRICH, R.; FAN, J., 1993	48.47	-81.4	IGNEOUS	VOLCANIC	THOLEIITE	2700	0	50.7	0.64	15.4		13.6			0.3	5.83	7.4	2.58	0.06	0.07	3.7	2.29	6.25	0.94	5.27	1.5	0.49	2.17	0.43	3.65	0.91	3.17	0.5	3.4	0.48	75.2							39.41
8718	GEOROC	LA FLECHE, M. R.; DUPUY, C.; BOUGAULT, H., 1992	48.25	-79.02	IGNEOUS	VOLCANIC	NOT-GIVEN	2699	1	54	0.68	17.19		8.81			0.1	6.4	8.26	4.7	0.1	1.13		8.5	19.3		9.4	2.4	0.76		0.43					1.39	0.23	25	173	156		110			86			0.26
JW-1	GEOROC	DOSTAL, J.; MUELLER, W. U., 1992	49.87	-74.35	IGNEOUS	VOLCANIC	NOT-GIVEN	2697.5	2.5	53.74	0.95	19.51		7.61			0.11	3.18	6.19	4.14	2.6	0.48	0.8	49.5	111	13.4	50.3	8.08	1.83	6.71	0.71	3.91	0.75	2.18	0.31	1.87	0.25	14	126	49		18			121		661	0.8	2.19
1	GEOROC	GOODWIN, A. M.; LAMBERT, M. B.; UJIKE, O., 2006	62.58	-114.15	IGNEOUS	VOLCANIC	BASALT	2695	35	50.92	1.44	15.43				12.19	0.26	5.92	11.19	2.06	0.39	0.18		8.2	22.7		11.3	4	2		0.8		1.5			2.7	0.4	42	283	177	56	97			91		81	0.4
6	GEOROC	GOODWIN, A. M.; LAMBERT, M. B.; UJIKE, O., 2006	62.61	-112.75	IGNEOUS	VOLCANIC	BASALT	2695	35	51.24	1.65	15.13				11.89	0.22	4.88	10.7	3.14	0.33	0.33		15.3	33.2		18.4	4.4	1.3		0.7		1.37			2.81	0.4	34.4	304	137	43	72			125		86	0.4
11	GEOROC	GOODWIN, A. M.; LAMBERT, M. B.; UJIKE, O., 2006	62.95	-112.3	IGNEOUS	VOLCANIC	BASALT	2695	35	51.43	1.1	16.33				10.45	0.28	6.4	10.14	2.91	0.16	0.16		9.4	21.5		9	3.3	2		0.7		1.1			2.8	0.4	39	246	218	47	124			99		182	0.3
12	GEOROC	GOODWIN, A. M.; LAMBERT, M. B.; UJIKE, O., 2006	62.95	-112.3	IGNEOUS	VOLCANIC	ANDESITE	2695	35	54.02	1.02	16.86				10.36	0.39	5.65	8.41	2.67	0.12	0.12		7.3	13.9		7	2.6	0.8		0.7		1.6			2.6	0.4	38	258	236	45	123			83		34	0.2
28	GEOROC	CATTELL, A., 1987	48.47	-81.4	IGNEOUS	VOLCANIC	BASALT	2690	-10	49.02	0.66	9.79		12.46				15.33	10.8	1.12	0.21		2.46															40	245	1440		426			37
KL-468	GEOROC	MYERS, R. E.; CAWTHORN, R. G.; MCCARTHY, T. S.; ANHAEUSSER, C. R., 1987	-25.87	24.73	IGNEOUS	VOLCANIC	NOT-GIVEN	2690	0	52.81	0.4	8.59		12.17			0.17	17.46	8.06	0.19	0.11	0.04		1	8		2												178	2618	88	516	76	43	34		16
PG-165	GEOROC	MYERS, R. E.; CAWTHORN, R. G.; MCCARTHY, T. S.; ANHAEUSSER, C. R., 1987	-25.87	24.73	IGNEOUS	VOLCANIC	NOT-GIVEN	2690	0	53.31	1.64	13.49		12.81			0.16	7.09	6.74	2.82	1.18	0.76		53	113		58												236	369	53	161	144	43	244		522
HS530	GEOROC	SANDEMAN, H. A.; HANMER, S.; DAVIS, W. J.; RYAN, J. J.; PETERSON, T. D., 2004	62	-94.5	IGNEOUS	VOLCANIC	BASALT	2685.5	4.5	50.06	1.04	12.57		13.59			0.3	5.83	9.27	2.55	0.33	0.05	3.1	2.72	7.81	1.27	6.36	2.16	0.75	3.12	0.54	3.68	0.81	2.35	0.34	2.08	0.29	44	319	181		72	61	106	58	16	142	0.17	0.05
RR174B	GEOROC	SANDEMAN, H. A.; HANMER, S.; DAVIS, W. J.; RYAN, J. J.; PETERSON, T. D., 2004	62	-94.5	IGNEOUS	VOLCANIC	ANDESITE	2685.5	4.5	54.02	1.42	13.35		9.68			0.15	5.19	6.48	3.76	0.09	0.24	3.92	22.01	48.93	6.58	134.92	32.17	1.79	6.46	1.02	6.23	1.22	3.47	0.5	2.97	0.49	30	187	16		25	87	33	222	21	56	0.79	0.48
HS421	GEOROC	SANDEMAN, H. A.; HANMER, S.; DAVIS, W. J.; RYAN, J. J.; PETERSON, T. D., 2004	62	-94.5	IGNEOUS	VOLCANIC	BASALT	2683.5	2.5	47.64	0.9	14.62		13.49			0.18	7.05	8.23	2.68	1.07	0.13	1.99	15.62	32.13	4.01	82.65	18.34	1.21	3.63	0.59	3.73	0.72	2.15	0.32	2	0.31	30	200	115		114	67	85	104	18	857	0.42	0.86
A1	GEOROC	BEN OTHMAN, D.; ARNDT, N. T.; WHITE, W. M.; JOCHUM, K. P., 1990	48.13	-79.92	IGNEOUS	VOLCANIC	TRACHYTE	2670.5	-0.5	50.25	0.76	12.83				7.04	0.13	3.78	6.27	0.51	5.51	1.17	9.5	150	327	45	137	24.4	8.5				2.3	4.8		3	0.5		176	118		55	102	105	295		2920		5
A10	GEOROC	BEN OTHMAN, D.; ARNDT, N. T.; WHITE, W. M.; JOCHUM, K. P., 1990	48.15	-80.03	IGNEOUS	VOLCANIC	TEPHRITE	2670	0	51.2	0.6	16.5				5.77	0.13	2.84	6.02	5.74	2.69	0.54	6.5				108	20.4
A2	GEOROC	BEN OTHMAN, D.; ARNDT, N. T.; WHITE, W. M.; JOCHUM, K. P., 1990	48.13	-79.92	IGNEOUS	VOLCANIC	TRACHYTE	2670	0	50.4	0.67	20.3				5.1	0.14	1.79	3.96	4.49	4.86	0.22	6.9	96	197	25	88.3	16.8	7.3				2.1	5.2		5	0.7		188	35			114	108	386		3370		8
A3	GEOROC	BEN OTHMAN, D.; ARNDT, N. T.; WHITE, W. M.; JOCHUM, K. P., 1990	48.13	-79.92	IGNEOUS	VOLCANIC	NOT-GIVEN	2670	0	50.3	1	18.3				7.94	0.12	2.16	3.14	2.99	5.14	0.62	6.4	145	288	39	159	30	6.7				2	4											324		4220		3
A5	GEOROC	BEN OTHMAN, D.; ARNDT, N. T.; WHITE, W. M.; JOCHUM, K. P., 1990	48.13	-79.92	IGNEOUS	VOLCANIC	TEPHRITE	2670	0	52.2	0.69	21.1				5.16	0.15	0.99	2.68	5.42	4.44	0.16	6.1	120	239	30	91.5	17.4	6.7				2.2	5.1		4.3	0.6		212			1	78	112	417		3370		6
AA21505	GEOROC	BEN OTHMAN, D.; ARNDT, N. T.; WHITE, W. M.; JOCHUM, K. P., 1990	48	-80	IGNEOUS	VOLCANIC	BASALT	2670	0	52.97	1	13.4				8.2		7	9.22	3	3.43																								90		1800
96-YK-14	GEOROC	COUSENS, B. L.; FACEY, K.; FALCK, H., 2002	62.5	-114.5	IGNEOUS	VOLCANIC	NOT-GIVEN	2660	0	48.33	0.95	15.09		13.44			0.2	6.72	9.58	2.11	0.18	0.08	2.98	8.69	19.35	2.57	11.21	2.87	1.04	3.49	0.59	3.72	0.79	2.34	0.35	2.19	0.34	27	204	245	43	145	93	79	61		76	0.14	0.26
98-CL-2	GEOROC	COUSENS, B. L.; FACEY, K.; FALCK, H., 2002	62.5	-114.5	IGNEOUS	VOLCANIC	NOT-GIVEN	2660	0	51.06	1.25	15.88		11.97			0.19	4.54	10.44	2.39	0.11	0.07	2.8	4.01	9.9	1.54	7.76	2.66	0.9	3.35	0.59	3.83	0.83	2.4	0.34	2.24	0.34		239	205	48	147	101		59			0.18	0.15
98-YK-10	GEOROC	COUSENS, B. L.; FACEY, K.; FALCK, H., 2002	62.5	-114.5	IGNEOUS	VOLCANIC	NOT-GIVEN	2660	0	50.95	1.04	15.81		11.68			0.16	6.48	8.46	2.55	0.08	0.11	3.4	11.37	24.62	3.24	14.8	3.57	1.11	3.46	0.56	3.61	0.78	2.34	0.33	2.21	0.33		212	223	44	146	91		64			0.2	0.34
98-YK-16	GEOROC	COUSENS, B. L.; FACEY, K.; FALCK, H., 2002	62.5	-114.5	IGNEOUS	VOLCANIC	NOT-GIVEN	2660	0	46.08	1.04	14.76		12.79			0.19	7.12	10.49	0.32	0.06	0.09	7.4	4.78	11.45	1.7	8.22	2.55	0.89	3.2	0.57	3.73	0.81	2.37	0.35	2.3	0.34		289	273	36	107	101		63			0.21	0.16
98-YK-17	GEOROC	COUSENS, B. L.; FACEY, K.; FALCK, H., 2002	62.5	-114.5	IGNEOUS	VOLCANIC	NOT-GIVEN	2660	0	53.39	1.39	16.62		10.83			0.24	4.14	6.77	3.13	0.1	0.12	4.3	4.69	12.28	1.93	11.14	3.58	1.08	4	0.72	4.69	1.04	2.94	0.41	2.52	0.36		356	238	51	116	84		79			0.25	0.12
98-YK-18	GEOROC	COUSENS, B. L.; FACEY, K.; FALCK, H., 2002	62.5	-114.5	IGNEOUS	VOLCANIC	NOT-GIVEN	2660	0	50.93	1.19	18.89		9.87			0.22	5.37	5.21	4.33	0.13	0.1	4.6	4.27	10.62	1.69	9.57	3.11	1.05	3.59	0.66	4.23	0.95	2.64	0.37	2.1	0.3		331	347	60	190	90		64		44	0.2	0.09
98-YK-20	GEOROC	COUSENS, B. L.; FACEY, K.; FALCK, H., 2002	62.5	-114.5	IGNEOUS	VOLCANIC	BASALT	2660	0	48.54	1.15	17.31		12.46			0.23	5.85	7.04	1.93	0.26	0.09	6.2	4.63	12	1.84	11.96	3.61	1	3.31	0.6	3.78	0.83	2.36	0.35	2.27	0.35		311	249	50	74	117		65			0.22	0.18
98-YK-39	GEOROC	COUSENS, B. L.; FACEY, K.; FALCK, H., 2002	62.5	-114.5	IGNEOUS	VOLCANIC	NOT-GIVEN	2660	0	48.86	0.96	18.14		12.64			0.17	5.42	6.42	3.8	0.28	0.25	3.2	30.36	61.29	7.52	30.55	5.68	1.53	4.37	0.65	4	0.8	2.27	0.32	2.06	0.31		219	79	44	159	96		106		53	0.35	1.11
98-YK-4	GEOROC	COUSENS, B. L.; FACEY, K.; FALCK, H., 2002	62.5	-114.5	IGNEOUS	VOLCANIC	NOT-GIVEN	2660	0	45.41	0.99	16.86		15.05			0.22	7.42	8.37	2.1	0.16	0.09	4.1	5.81	13.26	1.84	8.46	2.45	0.93	3.31	0.57	3.94	0.88	2.57	0.37	2.4	0.34		268	272	49	149	109		52		63	0.17	0.17
GS-15	GEOROC	COUSENS, B. L.; FACEY, K.; FALCK, H., 2002	62.5	-114.5	IGNEOUS	VOLCANIC	NOT-GIVEN	2660	0	53.48	1.15	13.08		9.39			0.11	6.83	4.09	3.59	0.29	0.41	6.61	32.32	71.08	8.69	21	4.71	1.56	5.25	0.75	3.83	0.76	2.09	0.35	2.2	0.35	18	160	240	29	130	110	17	210		50		1.36
GS-17	GEOROC	COUSENS, B. L.; FACEY, K.; FALCK, H., 2002	62.5	-114.5	IGNEOUS	VOLCANIC	NOT-GIVEN	2660	0	46.18	1.3	13.98		13.52			0.22	5.88	9.78	1.88	0.02	0.13	6.82	6.26	15.33	2.2	10.64	3.25	1.12	3.75	0.66	4.6	0.99	2.8	0.44	2.51	0.38	35	320	260	44	88	120	69	88		50		0.18
GS-24	GEOROC	COUSENS, B. L.; FACEY, K.; FALCK, H., 2002	62.5	-114.5	IGNEOUS	VOLCANIC	NOT-GIVEN	2660	0	49.33	1.27	14.04		13.117			0.19	5.64	7.41	2.73	0.08	0.13	6.4	7.15	15.43	2.58	10.68	3.26	1.22	4.18	0.73	5.13	1.1	3.45	0.48	3.2	0.48		305	196	45	75	119		84		22	0.34	0.2
W 853	GEOROC	BROOKS, C. K.; LUDDEN, J. N.; PIGEON, Y.; HUBREGTSE, J.J.M.W., 1982	54.8	-95.3	IGNEOUS	VOLCANIC	SHOSHONITE	2650	0	53.44	1	20.67	1.11		7.3			2.83	7.7	3	2.48	0.46		60.2	102		47.9	8.2	1.9		0.63	3.41				1.88	0.26								161
PIC-121	GEOROC	KITAYAMA, Y. C.; FRANCIS, D. M., 2014	48.58	-86.28	IGNEOUS	VOLCANIC	NOT-GIVEN	2650	50	47.41	1.94	11.22				14.81	0.29	6.67	9.41	3.65	0.13	0.14	2.51	9.26	35.5	3.6	17.2	4.65	1.35	4.75	0.81	4.69	0.9	2.53	0.367	2.36	0.359		351.5	387.13	63.7	233	144	85	108	15.1	224.898	0.59
PIC-129	GEOROC	KITAYAMA, Y. C.; FRANCIS, D. M., 2014	48.58	-86.28	IGNEOUS	VOLCANIC	THOLEIITE	2650	50	48.16	0.67	12.44				10.81	0.19	9.24	13.02	1.17	0.13	0.07	2.64		22.9														220.4	965.362	64.5	337	42	173	45.8	13.25	26.3321
PIC-206	GEOROC	KITAYAMA, Y. C.; FRANCIS, D. M., 2014	48.58	-86.28	IGNEOUS	VOLCANIC	NOT-GIVEN	2650	50	46.08	1.97	9.15				16.56	0.22	8.89	11.4	2.27	0.49	0.12	1.7	10.2	22	3.89	17.6	4.72	1.6	5.12	0.82	4.49	0.85	2.28	0.328	2.02	0.302		362.6	672.243	90	316	90	631	94.79	16.23	106.851	0.55
PIC-211	GEOROC	KITAYAMA, Y. C.; FRANCIS, D. M., 2014	48.58	-86.28	IGNEOUS	VOLCANIC	NOT-GIVEN	2650	50	47.9	2.28	12.65				15.79	0.23	6.54	8.69	3.77	0.32	0.16	0.66	12.6	24	4.75	20.2	5.26	1.91	5.52	0.92	5.1	0.96	2.53	0.357	2.18	0.338		377.2	71.5007	77	142	91	473	120.46	20.6	129.242	0.73
PIC-41	GEOROC	KITAYAMA, Y. C.; FRANCIS, D. M., 2014	48.58	-86.28	IGNEOUS	VOLCANIC	THOLEIITE	2650	50	48.35	0.67	12.11				11.03	0.2	10.91	11.04	1.91	0.14	0.07	2.34	3.5		1.26	6.17	1.95	0.843	2.53	0.47	2.99	0.65	1.9	0.288	1.87	0.297		231	909.324	64	307	45	160	46	12		0.12	1
PIC-42	GEOROC	KITAYAMA, Y. C.; FRANCIS, D. M., 2014	48.58	-86.28	IGNEOUS	VOLCANIC	THOLEIITE	2650	50	49.48	0.63	11.13				10.6	0.2	11.06	11.59	1.72	0.12	0.06	2.24	3.1	22	1.16	6	1.83	0.579	2.39	0.46	2.92	0.61	1.82	0.276	1.87	0.288		212.3	865.192	53.1	291	43	99	43.2	10.1	15.5843	0.12
PIC-55	GEOROC	KITAYAMA, Y. C.; FRANCIS, D. M., 2014	48.58	-86.28	IGNEOUS	VOLCANIC	THOLEIITE	2650	50	45.59	0.56	10.05				10.09	0.18	14.87	9.8	1.25	0.05	0.06	6.41																180	1417.01	70	496	37	131	38	9
PIC-57	GEOROC	KITAYAMA, Y. C.; FRANCIS, D. M., 2014	48.58	-86.28	IGNEOUS	VOLCANIC	THOLEIITE	2650	50	49.76	0.9	12.68				10.55	0.19	8.04	13.41	0.91	0.16	0.1	2.35		17.6														237.5	501.805	39.5	155	52	22	66.3	12.9	29.8251
PIC-58	GEOROC	KITAYAMA, Y. C.; FRANCIS, D. M., 2014	48.58	-86.28	IGNEOUS	VOLCANIC	THOLEIITE	2650	50	50.64	0.93	13.07				11.08	0.19	7.52	11.56	1.74	0.17	0.1	1.69		20														234.2	517.952	47.5	176	53	172	69.3	13.46	15.853
PIC-73	GEOROC	KITAYAMA, Y. C.; FRANCIS, D. M., 2014	48.58	-86.28	IGNEOUS	VOLCANIC	THOLEIITE	2650	50	48.65	0.85	15.97				10.72	0.18	6.01	12	2.91	0.21	0.07	1.38		25.5														270.2	349.84	44.5	154	59	191	46.5	15.1	26.6008
PIC-74	GEOROC	KITAYAMA, Y. C.; FRANCIS, D. M., 2014	48.58	-86.28	IGNEOUS	VOLCANIC	THOLEIITE	2650	50	49.01	0.86	16				10.67	0.18	6.28	11.29	3.11	0.22	0.07	1.11	2.95	18.8	1.17	6.1	1.96	0.715	2.57	0.48	3.13	0.66	1.95	0.297	1.93	0.305		274.1	350.319	41.7	156	54	184	46.43	14.9	36.3634	0.15
PIC-75	GEOROC	KITAYAMA, Y. C.; FRANCIS, D. M., 2014	48.58	-86.28	IGNEOUS	VOLCANIC	THOLEIITE	2650	50	48.58	0.9	14.89				11.31	0.2	7.33	11.72	2.24	0.17	0.07	1.33	3.18	15.2	1.26	6.61	2.12	0.759	2.73	0.5	3.28	0.69	2.05	0.316	2.12	0.34		284.9	305.366	38.4	123	62	217	49.4	14.6	22.033	0.15
PIC-77	GEOROC	KITAYAMA, Y. C.; FRANCIS, D. M., 2014	48.58	-86.28	IGNEOUS	VOLCANIC	THOLEIITE	2650	50	48.16	0.83	15.4				10.8	0.18	6.19	13.81	1.28	0.13	0.07	2.05		15.5														257	331.777	42.4	143	54	184	44.8	15.1
PIC-85	GEOROC	KITAYAMA, Y. C.; FRANCIS, D. M., 2014	48.58	-86.28	IGNEOUS	VOLCANIC	THOLEIITE	2650	50	49.68	0.94	13.44				10.69	0.19	7.27	13.34	0.86	0.11	0.1	2.25	4.71	19	1.85	9.42	2.92	1.08	3.75	0.71	4.49	0.96	2.83	0.434	2.83	0.455		240.7	434.341	38	133	51	60	71.2	14.7		0.21
PIC-86	GEOROC	KITAYAMA, Y. C.; FRANCIS, D. M., 2014	48.58	-86.28	IGNEOUS	VOLCANIC	THOLEIITE	2650	50	48.09	0.98	13.35				12.18	0.21	8.64	11.07	1.56	0.14	0.1	2.47		27														254.7	464.72	43	149	75	18	74.5	13
PIC-93	GEOROC	KITAYAMA, Y. C.; FRANCIS, D. M., 2014	48.58	-86.28	IGNEOUS	VOLCANIC	THOLEIITE	2650	50	47.15	0.89	12.79				12.1	0.2	11.62	9.13	2.01	0.12	0.1	2.79	4.2		1.64	8.38	2.6	0.864	3.33	0.62	3.93	0.82	2.45	0.384	2.54	0.405		234	656.164	65	255	75	37	64	13	10.7478	0.19	2
PIC-95	GEOROC	KITAYAMA, Y. C.; FRANCIS, D. M., 2014	48.58	-86.28	IGNEOUS	VOLCANIC	THOLEIITE	2650	50	47.26	0.92	12.66				11.26	0.18	9.88	9.56	2.17	0.14	0.1	4.34																230	524.794	57	197	59	142	69	13			2
36	GEOROC	CONDIE, K. C.; BOBROW, D. J.; CARD, K. D., 1987	47	-80	IGNEOUS	VOLCANIC	THOLEIITE	2630	0	51.6	1.26	14.1		15			0.21	5.14	9.51	2.37	0.63	0.12	0.52	13	28			3.7	1.3		0.72					3	0.5	48	353	28	62	73			106		244	0.46	0.8
38	GEOROC	CONDIE, K. C.; BOBROW, D. J.; CARD, K. D., 1987	47	-80	IGNEOUS	VOLCANIC	THOLEIITE	2630	0	50.4	1.75	12.7		18.2			0.25	4.61	9.01	2.1	0.5	0.21	0.59	11	26			4.3	1.6		0.93					3.7	0.57	34	400	24	33	11			135		140	0.66
74	GEOROC	CONDIE, K. C.; BOBROW, D. J.; CARD, K. D., 1987	47	-80	IGNEOUS	VOLCANIC	THOLEIITE	2630	0	49.1	1.69	13.9		15.1			0.21	6.34	10.04	2.12	0.69	0.16	1.02	9	22			3.9	1.6		0.81					3.1	0.48	49	391	110	58	77			106		142	0.4
107	GEOROC	CONDIE, K. C.; BOBROW, D. J.; CARD, K. D., 1987	47	-80	IGNEOUS	VOLCANIC	THOLEIITE	2630	0	50.7	1.21	14.1		15			0.21	5.39	9.41	2.51	0.76	0.17	0.98	13	29			4	1.4		0.77					3.1	0.51	40	298	88	52	87			116		243	0.4	0.5
5	GEOROC	FRYER, B. J.; JENNER, G. A., 1978	68	-85	IGNEOUS	VOLCANIC	THOLEIITE	2600	100	52.3	0.95	11.84		12.37			0.21	7.65	11.3	2.77	0.08	0.07	0.57	3.62	9.5	1.48	7.56	2.52	0.9	3.4		4.06		2.49						141		67		64	48		60
6	GEOROC	FRYER, B. J.; JENNER, G. A., 1978	68	-85	IGNEOUS	VOLCANIC	THOLEIITE	2600	100	48	0.91	14.93		13.46			0.21	9.18	10.18	2.08	0.25	0.07	0.81																	149		225		52	50		110
7	GEOROC	FRYER, B. J.; JENNER, G. A., 1978	68	-85	IGNEOUS	VOLCANIC	THOLEIITE	2600	100	49.12	0.9	15.06		12.31			0.21	8.11	11.24	2.38	0.11	0.06	0.73	3.97	10.1	1.48	8.55	3.08	1.3	4.64		5.27		2.52						320		138		88	41		80
8	GEOROC	FRYER, B. J.; JENNER, G. A., 1978	68	-85	IGNEOUS	VOLCANIC	THOLEIITE	2600	100	48.87	1.16	14.74		13.92			0.2	7.28	9.6	2.97	0.38	0.12	0.59	5.74	15.3	2.14	11.4	3.5	1.28	4.62		5.27		3.12		1.98				146		128		57	62		110
9	GEOROC	FRYER, B. J.; JENNER, G. A., 1978	68	-85	IGNEOUS	VOLCANIC	THOLEIITE	2600	100	49.71	1.04	15.28		11.57			0.2	6.64	11.73	2.5	0.24	0.08	0.61	4.57	12.6	1.91	10	3.4	1.18	4.59		5.56		3.22						285		79		39	50		120
10	GEOROC	FRYER, B. J.; JENNER, G. A., 1978	68	-85	IGNEOUS	VOLCANIC	THOLEIITE	2600	100	50.72	1.9	12.8		18.21			0.21	4.27	9.62	3.13	0.11	0.08	0.51	4.71	18.3	2.38	15.6	5.08	1.71	7.22		9.22		6.27		7.03								6	86		180
11	GEOROC	FRYER, B. J.; JENNER, G. A., 1978	68	-85	IGNEOUS	VOLCANIC	THOLEIITE	2600	100	49.84	0.61	16.18		10.43			0.18	8.68	9.97	2.12	1.32	0.07	0.57	10.6	27	2.98	13.1	2.94	0.85	3.4		3.81		2.95						262		148		4	59		350
12	GEOROC	FRYER, B. J.; JENNER, G. A., 1978	68	-85	IGNEOUS	VOLCANIC	THOLEIITE	2600	100	52.79	0.67	15.26		9.19			0.18	8.16	10.63	2.22	0.42	0.07	0.64	6.48	16.9	2.08	9.8	2.82	1.02	3.76		4.37		2.69						249		151		3	57		140
13	GEOROC	FRYER, B. J.; JENNER, G. A., 1978	68	-85	IGNEOUS	VOLCANIC	THOLEIITE	2600	100	50.05	0.64	15.77		10.89			0.19	8.15	11.26	2.36	0.12	0.06	0.66	7.66	17	1.66	8.3	2.19	0.65	2.91		2.97		1.99						270		178		72	43		60
H-10	GEOROC	MANIKYAMBA, C.; KERRICH, R.; KHANNA, T. C.; SATYANARAYANAN, M.; KESHAV KRISHNA, A., 2009	16.1	76.6	IGNEOUS	VOLCANIC	BASALT	2600	0	52.52	0.83	12.07		12.7			0.2	9.11	8.19	2.81	0.32	0.1	1.02	5.67	13.91	1.48	8.29	2.2	0.91	3.19	0.61	3.66	0.82	2.64	0.46	2.58	0.4	47	314	233	54	110			84		102	0.66	0.41
H-13	GEOROC	MANIKYAMBA, C.; KERRICH, R.; KHANNA, T. C.; SATYANARAYANAN, M.; KESHAV KRISHNA, A., 2009	16.1	76.6	IGNEOUS	VOLCANIC	BASALT	2600	0	52.55	1.47	11.89		14.47			0.24	6.4	7.96	3.06	0.06	0.15	1.3	10.26	23.14	2.57	14.43	3.99	1.32	5.71	1.01	6	1.27	4.34	0.76	4.19	0.66	49	432	209	64	137			143		58	0.89	0.68
H-14	GEOROC	MANIKYAMBA, C.; KERRICH, R.; KHANNA, T. C.; SATYANARAYANAN, M.; KESHAV KRISHNA, A., 2009	16.1	76.6	IGNEOUS	VOLCANIC	BASALT	2600	0	53.17	1.43	11.97		15.66			0.22	5.21	8.1	2.45	0.12	0.15	1.21	8.86	21.06	2.28	12.72	3.5	1.81	5.31	0.96	5.66	1.23	4.12	0.73	4	0.6	45	397	180	51	128			119		112	0.81	0.56
H-20	GEOROC	MANIKYAMBA, C.; KERRICH, R.; KHANNA, T. C.; SATYANARAYANAN, M.; KESHAV KRISHNA, A., 2009	16.1	76.6	IGNEOUS	VOLCANIC	BASALT	2600	0	52.12	1.34	12.42		15.12			0.21	7.28	6.68	3.69	0.17	0.15	1.29	8.92	21.54	2.3	13.11	3.56	1.19	4.88	0.9	5.21	1.11	3.64	0.61	3.55	0.53	45	370	205	40	73			123		69	0.7	0.54
H-21	GEOROC	MANIKYAMBA, C.; KERRICH, R.; KHANNA, T. C.; SATYANARAYANAN, M.; KESHAV KRISHNA, A., 2009	16.1	76.6	IGNEOUS	VOLCANIC	BASALT	2600	0	51.27	1.29	11.77		14.78			0.22	5.91	9.67	3.25	0.17	0.17	1.68	9.72	22.09	2.33	13.29	3.66	1.32	5.64	1.04	6.39	1.39	4.64	0.81	4.24	0.65	44	355	196	49	105			120		77	0.74	0.52
H-22	GEOROC	MANIKYAMBA, C.; KERRICH, R.; KHANNA, T. C.; SATYANARAYANAN, M.; KESHAV KRISHNA, A., 2009	16.1	76.6	IGNEOUS	VOLCANIC	BASALT	2600	0	52.09	1.38	12.2		14.63			0.17	5.89	8.49	3.27	0.17	0.16	1.26	8.58	20.42	2.23	12.54	3.47	1.28	4.79	0.93	5.39	1.2	3.84	0.66	3.66	0.56	46	383	199	49	82			129		50	0.87	0.58
H-26	GEOROC	MANIKYAMBA, C.; KERRICH, R.; KHANNA, T. C.; SATYANARAYANAN, M.; KESHAV KRISHNA, A., 2009	16.1	76.6	IGNEOUS	VOLCANIC	BASALT	2600	0	52.76	0.8	10.75		14.02			0.2	8.68	9.42	2.05	0.19	0.1	1.11	5.96	14.4	1.57	8.74	2.36	0.87	3.41	0.64	3.72	0.82	2.7	0.45	2.55	0.39	46	310	142	51	94			73		44	0.66	0.34
H-27	GEOROC	MANIKYAMBA, C.; KERRICH, R.; KHANNA, T. C.; SATYANARAYANAN, M.; KESHAV KRISHNA, A., 2009	16.1	76.6	IGNEOUS	VOLCANIC	BASALT	2600	0	52.73	0.83	11.58		12.37			0.19	8.53	9.27	2.63	0.16	0.1	1.06	5.49	13.14	1.44	8.14	2.27	0.85	3.18	0.61	3.66	0.78	2.51	0.42	2.37	0.35	44	300	127	51	93			65		49	0.77	0.37
H-31	GEOROC	MANIKYAMBA, C.; KERRICH, R.; KHANNA, T. C.; SATYANARAYANAN, M.; KESHAV KRISHNA, A., 2009	16.1	76.6	IGNEOUS	VOLCANIC	BASALT	2600	0	50.38	0.65	12.95		11.64			0.18	9.94	10.37	1.52	0.94	0.1	1.2	6	13.76	1.51	8.57	2.21	0.8	2.89	0.53	2.87	0.65	2.15	0.38	2.25	0.35	42	270	218	52	108			81		174	0.86	0.37
H-32	GEOROC	MANIKYAMBA, C.; KERRICH, R.; KHANNA, T. C.; SATYANARAYANAN, M.; KESHAV KRISHNA, A., 2009	16.1	76.6	IGNEOUS	VOLCANIC	BASALT	2600	0	50.63	0.72	12.84		12.64			0.2	9.45	10.18	1.48	0.96	0.1	1	5.78	13.92	1.49	8.4	2.18	0.8	2.81	0.51	2.82	0.61	2.03	0.37	2.18	0.32	38	260	261	49	109			80		190	0.68	0.33
H-33	GEOROC	MANIKYAMBA, C.; KERRICH, R.; KHANNA, T. C.; SATYANARAYANAN, M.; KESHAV KRISHNA, A., 2009	16.1	76.6	IGNEOUS	VOLCANIC	BASALT	2600	0	53.11	1.18	10.74		14.88			0.2	7.2	7.73	3.45	0.11	0.13	1.21	6.45	17.86	1.85	10.83	3.23	1.15	4.39	0.85	4.71	1.01	3.23	0.56	3.02	0.47	35	314	113	46	72			112		33	0.85	0.41
H-58	GEOROC	MANIKYAMBA, C.; KERRICH, R.; KHANNA, T. C.; SATYANARAYANAN, M.; KESHAV KRISHNA, A., 2009	16.1	76.6	IGNEOUS	VOLCANIC	BASALT	2600	0	47.13	1.27	11.37		15.68			0.2	10.77	11.32	2.02	0.15	0.12	0.89	4.61	12.9	1.68	10.73	3.25	1.26	4.69	0.79	4.54	0.91	2.84	0.46	2.32	0.32	46	361	617	53	144			26		51	0.53	0.18
H-59	GEOROC	MANIKYAMBA, C.; KERRICH, R.; KHANNA, T. C.; SATYANARAYANAN, M.; KESHAV KRISHNA, A., 2009	16.1	76.6	IGNEOUS	VOLCANIC	BASALT	2600	0	47.51	1.13	10.62		15.39			0.18	11.49	10.48	2.06	0.15	0.1	1.08	4.43	12.81	1.62	10.7	3.25	1.13	4.4	0.81	4.49	0.94	2.9	0.48	2.48	0.35	41	350	572	54	127			49		42	0.51	0.11
H-60	GEOROC	MANIKYAMBA, C.; KERRICH, R.; KHANNA, T. C.; SATYANARAYANAN, M.; KESHAV KRISHNA, A., 2009	16.1	76.6	IGNEOUS	VOLCANIC	BASALT	2600	0	50.88	1.23	10.92		12.55			0.18	9.73	10.29	2.27	0.24	0.11	1.99	5.32	13.95	1.78	10.79	3.16	1.1	4.43	0.8	4.53	0.93	2.9	0.48	2.47	0.33	43	337	552	52	172			32		80	0.52	0.22
H-62	GEOROC	MANIKYAMBA, C.; KERRICH, R.; KHANNA, T. C.; SATYANARAYANAN, M.; KESHAV KRISHNA, A., 2009	16.1	76.6	IGNEOUS	VOLCANIC	BASALT	2600	0	47.68	1.23	11.88		15.28			0.18	11.14	9.63	2.56	0.16	0.11	0.96	3.8	10.97	1.44	9.27	2.82	1.18	4.07	0.79	4.36	0.91	2.86	0.46	2.41	0.32	44	357	586	54	136			43		85	0.49	0.11
H-63	GEOROC	MANIKYAMBA, C.; KERRICH, R.; KHANNA, T. C.; SATYANARAYANAN, M.; KESHAV KRISHNA, A., 2009	16.1	76.6	IGNEOUS	VOLCANIC	BASALT	2600	0	50.79	1.29	11.39		12.55			0.19	10.6	9.48	1.82	0.31	0.13	2.01	4.55	12.62	1.67	10.57	3.28	1.16	4.47	0.79	4.54	0.92	2.86	0.48	2.32	0.31	41	335	687	46	171			22		87	0.52	0.13
H-67	GEOROC	MANIKYAMBA, C.; KERRICH, R.; KHANNA, T. C.; SATYANARAYANAN, M.; KESHAV KRISHNA, A., 2009	16.1	76.6	IGNEOUS	VOLCANIC	BASALT	2600	0	50.44	1.03	12.19		12.18			0.2	10.54	9.44	2.17	0.16	0.09	1.98	3.48	9.48	1.25	7.88	2.27	0.87	3.38	0.61	3.61	0.77	2.54	0.45	2.32	0.35	41	308	538	56	213			33		47	0.41	0.12
H-68	GEOROC	MANIKYAMBA, C.; KERRICH, R.; KHANNA, T. C.; SATYANARAYANAN, M.; KESHAV KRISHNA, A., 2009	16.1	76.6	IGNEOUS	VOLCANIC	BASALT	2600	0	46.13	0.99	12.3		15.22			0.18	10.56	12.02	1.75	0.17	0.1	0.93	3.51	9.81	1.25	8.03	2.42	0.88	3.3	0.66	3.8	0.8	2.65	0.45	2.43	0.35	42	316	573	55	170			29		36	0.42	0.11
H-69	GEOROC	MANIKYAMBA, C.; KERRICH, R.; KHANNA, T. C.; SATYANARAYANAN, M.; KESHAV KRISHNA, A., 2009	16.1	76.6	IGNEOUS	VOLCANIC	BASALT	2600	0	50.8	0.98	12.37		12.44			0.18	9.97	9.88	1.98	0.26	0.09	1.96	4.34	10.95	1.33	8.16	2.37	0.85	3.34	0.58	3.33	0.72	2.33	0.41	2.2	0.32	38	278	520	49	154			31		72	0.43	0.17
H-70	GEOROC	MANIKYAMBA, C.; KERRICH, R.; KHANNA, T. C.; SATYANARAYANAN, M.; KESHAV KRISHNA, A., 2009	16.1	76.6	IGNEOUS	VOLCANIC	BASALT	2600	0	50.66	0.87	11.47		12.69			0.18	10.51	10.11	1.9	0.12	0.09	2.21	2.92	8.01	1.02	6.64	2.01	0.85	2.95	0.55	3.19	0.69	2.33	0.4	2.21	0.32	41	289	734	47	168			35		32	0.36	0.1
H-71	GEOROC	MANIKYAMBA, C.; KERRICH, R.; KHANNA, T. C.; SATYANARAYANAN, M.; KESHAV KRISHNA, A., 2009	16.1	76.6	IGNEOUS	VOLCANIC	BASALT	2600	0	50.25	0.86	12.02		12.61			0.18	9.81	9.88	2.02	0.1	0.1	2.32	3.11	8.43	1.1	7.15	2.13	0.71	3.16	0.56	3.27	0.7	2.4	0.43	2.23	0.33	41	286	767	55	180			49		48	0.41	0.11
BK	GEOROC	RIVALENTI, G.; GIRARDI, V. A. V.; COLTORTI, M.; CORREIA, C. T.; MAZZUCCHELLI, M., 1989	-14.62	-49.42	IGNEOUS	VOLCANIC	NOT-GIVEN	2550	50	52.19	0.92	11.65	2.12		9.53		0.17	8.7	12.81	1.56	0.19	0.15																44	282	627	53	177			45
BK	GEOROC	RIVALENTI, G.; GIRARDI, V. A. V.; COLTORTI, M.; CORREIA, C. T.; MAZZUCCHELLI, M., 1989	-14.62	-49.42	IGNEOUS	VOLCANIC	NOT-GIVEN	2550	50	51.01	0.87	13.64	1.87		8.4		0.21	8.93	13.61	1.09	0.25	0.12																44	287	477	37	151			39
MG18	GEOROC	RIVALENTI, G.; GIRARDI, V. A. V.; COLTORTI, M.; CORREIA, C. T.; MAZZUCCHELLI, M., 1989	-14.62	-49.42	IGNEOUS	VOLCANIC	NOT-GIVEN	2550	50	52.7	0.33	3.6	1.86		8.37		0.22	18.29	13.88	0.52	0.14	0.08																46	175	2500	50	270			10
MG6	GEOROC	RIVALENTI, G.; GIRARDI, V. A. V.; COLTORTI, M.; CORREIA, C. T.; MAZZUCCHELLI, M., 1989	-14.62	-49.42	IGNEOUS	VOLCANIC	NOT-GIVEN	2550	50	51.01	1.61	12.13	3.07		13.82		0.21	6.4	9.17	2.05	0.26	0.26																47	353	239	62	91			130
MG9	GEOROC	RIVALENTI, G.; GIRARDI, V. A. V.; COLTORTI, M.; CORREIA, C. T.; MAZZUCCHELLI, M., 1989	-14.62	-49.42	IGNEOUS	VOLCANIC	NOT-GIVEN	2550	50	51.69	0.88	12.92	2.12		9.52		0.18	8.93	11.18	2.16	0.28	0.14																44	272	357	48	131			44
PK	GEOROC	RIVALENTI, G.; GIRARDI, V. A. V.; COLTORTI, M.; CORREIA, C. T.; MAZZUCCHELLI, M., 1989	-14.62	-49.42	IGNEOUS	VOLCANIC	NOT-GIVEN	2550	50	48.91	0.44	6.76	2.07		9.32		0.19	24.4	7.31	0.46	0.08	0.07																29	167	2820	92	1370			20
PK30	GEOROC	RIVALENTI, G.; GIRARDI, V. A. V.; COLTORTI, M.; CORREIA, C. T.; MAZZUCCHELLI, M., 1989	-14.62	-49.42	IGNEOUS	VOLCANIC	NOT-GIVEN	2550	50	47.65	0.28	6.02	1.82		8.21		0.15	30.3	5.38	0.12	0.03	0.04																23	152	2733	103	1081			5
PK33	GEOROC	RIVALENTI, G.; GIRARDI, V. A. V.; COLTORTI, M.; CORREIA, C. T.; MAZZUCCHELLI, M., 1989	-14.62	-49.42	IGNEOUS	VOLCANIC	NOT-GIVEN	2550	50	46.8	0.27	5.67	1.69		7.59		0.13	33.41	4.32	0.07	0.02	0.03																21	127	2363	118	1433			9
PK38	GEOROC	RIVALENTI, G.; GIRARDI, V. A. V.; COLTORTI, M.; CORREIA, C. T.; MAZZUCCHELLI, M., 1989	-14.62	-49.42	IGNEOUS	VOLCANIC	NOT-GIVEN	2550	50	45.35	0.19	3.54	1.85		8.34		0.12	38.91	1.68			0.02																18	99	2568	139	1853
PYK15	GEOROC	RIVALENTI, G.; GIRARDI, V. A. V.; COLTORTI, M.; CORREIA, C. T.; MAZZUCCHELLI, M., 1989	-14.62	-49.42	IGNEOUS	VOLCANIC	NOT-GIVEN	2550	50	46.09	0.65	12.08	2.04		9.18		0.22	15.25	13.44	0.74	0.23	0.1																43	276	485	62	360			14
PYK18	GEOROC	RIVALENTI, G.; GIRARDI, V. A. V.; COLTORTI, M.; CORREIA, C. T.; MAZZUCCHELLI, M., 1989	-14.62	-49.42	IGNEOUS	VOLCANIC	NOT-GIVEN	2550	50	51.97	0.4	6.47	1.53		6.87		0.19	18.62	13.56	0.18	0.12	0.09																51	230	1950	63	367			10
11月-02	GEOROC	POLAT, A.; KUSKY, T. M.; LI, JIANGHAI; FRYER, B. J.; KERRICH, R.; PATRICK, K., 2005	39.0068	114.128	IGNEOUS	VOLCANIC	BASALT	2525	25	50.8	0.86	15.13		11.08			0.18	8.41	9.65	0.07	3.35	0.46	0.81	12.07	16.25	1.78	7.07	1.92	0.7	2.71	0.45	3.01	0.64	1.9	0.27	1.77	0.27		238	276	50	142	48	41	24		149	0.17	0.152
2002-63	GEOROC	POLAT, A.; KUSKY, T. M.; LI, JIANGHAI; FRYER, B. J.; KERRICH, R.; PATRICK, K., 2005	38.8669	113.714	IGNEOUS	VOLCANIC	BASALT	2525	25	50.6	1.23	15.42		13.17			0.19	6.8	9.48	1.94	1.02	0.14	1.21	10.56	24.35	3.2	14.19	3.62	1.15	3.88	0.64	4	0.8	2.25	0.31	1.97	0.28		283	82	61	137	114	140	24		214	0.18	0.354
2002-64A	GEOROC	POLAT, A.; KUSKY, T. M.; LI, JIANGHAI; FRYER, B. J.; KERRICH, R.; PATRICK, K., 2005	38.8689	113.714	IGNEOUS	VOLCANIC	BASALT	2525	25	50.6	0.97	15.58		11.52			0.2	7.64	9.67	2.95	0.77	0.1	1.01	6.23	13.62	2.02	9.25	2.53	0.88	2.89	0.49	3	0.59	1.7	0.22	1.45	0.2		324	270	64	205	129	68	18		194	0.07	0.141
2002-71	GEOROC	POLAT, A.; KUSKY, T. M.; LI, JIANGHAI; FRYER, B. J.; KERRICH, R.; PATRICK, K., 2005	38.8733	113.767	IGNEOUS	VOLCANIC	BASALT	2525	25	50.75	0.99	13.65		14.76			0.23	6.56	9.89	2.26	0.8	0.11	0.3	6.66	16.57	2.2	9.63	2.61	0.91	3.2	0.58	3.69	0.79	2.37	0.35	2.31	0.35		343	112	63	65	143	92	43		121	0.15	0.082
2002-72	GEOROC	POLAT, A.; KUSKY, T. M.; LI, JIANGHAI; FRYER, B. J.; KERRICH, R.; PATRICK, K., 2005	38.8733	113.767	IGNEOUS	VOLCANIC	BASALT	2525	25	51.09	0.94	13.79		14.31			0.21	6.53	9.82	2.31	0.9	0.1	0.91	6.8	15.62	2.13	9.65	2.64	0.89	3.11	0.55	3.67	0.79	2.33	0.33	2.23	0.32		369	131	67	69	178	84	32		122	0.14	0.094
2002-73	GEOROC	POLAT, A.; KUSKY, T. M.; LI, JIANGHAI; FRYER, B. J.; KERRICH, R.; PATRICK, K., 2005	38.7787	113.74	IGNEOUS	VOLCANIC	BASALT	2525	25	49.63	1.16	15.28		13.33			0.19	7.75	8.47	2.49	1.58	0.13	1.06	11.46	24.9	3.39	14.59	3.6	1.07	3.84	0.65	3.95	0.82	2.33	0.32	2.08	0.3		270	83	64	156	114	180	38		332	0.24	0.281
2002-74	GEOROC	POLAT, A.; KUSKY, T. M.; LI, JIANGHAI; FRYER, B. J.; KERRICH, R.; PATRICK, K., 2005	38.8689	113.74	IGNEOUS	VOLCANIC	BASALT	2525	25	50.87	1.84	16.71		12.92			0.18	4.83	7.97	0.3	3.48	0.9	0.5	22.51	50.65	7.09	31.06	6.83	2.02	6.12	0.96	5.45	1.09	3.04	0.42	2.71	0.42		204		33	41	54	68	48		317	0.6	0.281
2002-85	GEOROC	POLAT, A.; KUSKY, T. M.; LI, JIANGHAI; FRYER, B. J.; KERRICH, R.; PATRICK, K., 2005	38.9303	113.693	IGNEOUS	VOLCANIC	BASALT	2525	25	48.82	1.03	12.57		15.12			0.28	10.81	9.7	0.09	1.28	0.31	1.42	11.49	26.1	3.42	15.29	4.3	1.89	5.58	0.93	5.87	1.19	3.45	0.48	3.16	0.48		234	139	32	44	99	5	32		76	0.23	0.3
2002-86	GEOROC	POLAT, A.; KUSKY, T. M.; LI, JIANGHAI; FRYER, B. J.; KERRICH, R.; PATRICK, K., 2005	38.9303	113.693	IGNEOUS	VOLCANIC	BASALT	2525	25	47.7	0.61	14.39		15.26			0.29	9.56	9.88	0.05	1.79	0.46	0.91	3.1	7.41	1.05	5.36	1.88	1.07	2.54	0.44	2.87	0.6	1.81	0.26	1.64	0.25		199	207	35	63	114		15		78	0.09	0.067
2002-92	GEOROC	POLAT, A.; KUSKY, T. M.; LI, JIANGHAI; FRYER, B. J.; KERRICH, R.; PATRICK, K., 2005	38.5	113	IGNEOUS	VOLCANIC	BASALT	2525	25	49.54	0.97	16.75		12.07			0.14	6.96	8.65	3.06	1.67	0.19	1.16	11.46	27.49	3.67	15.76	3.53	1.18	3.43	0.56	3.29	0.68	2.04	0.28	1.82	0.28		223	155	53	158	86	78	63		411	0.19	0.099
2002-93	GEOROC	POLAT, A.; KUSKY, T. M.; LI, JIANGHAI; FRYER, B. J.; KERRICH, R.; PATRICK, K., 2005	38.5	113	IGNEOUS	VOLCANIC	BASALT	2525	25	49.32	1.64	13.3		16.65			0.3	5.67	8.95	1.9	2.01	0.26	1.16	11.95	28.06	3.75	16.14	4.78	1.24	4.45	0.77	4.89	1.03	3.04	0.43	2.85	0.41		451	93	58	48	122	63	29		416	0.24	0.552
2002-94	GEOROC	POLAT, A.; KUSKY, T. M.; LI, JIANGHAI; FRYER, B. J.; KERRICH, R.; PATRICK, K., 2005	38.5	113	IGNEOUS	VOLCANIC	BASALT	2525	25	50.4	1.67	13.49		15.45			0.32	5.71	8	2.2	2.51	0.25	1.21	16.1	35.54	4.61	19.88	4.74	1.41	5.26	0.86	5.46	1.13	3.3	0.46	2.95	0.45		421	73	54	63	132	81	76		631	0.27	0.226
TK-15	GEOROC	POLAT, A.; KUSKY, T. M.; LI, JIANGHAI; FRYER, B. J.; KERRICH, R.; PATRICK, K., 2005	38.5	113	IGNEOUS	VOLCANIC	BASALT	2525	25	51.22	1.03	13.58		14.15			0.22	6.97	10.19	1.95	0.56	0.13	0.96	9.33	20.86	2.75	11.89	2.91	0.9	3.32	0.56	3.65	0.77	2.33	0.33	2.2	0.33		340	180	60	83	91	54	22		151	0.14	0.107
TK16	GEOROC	POLAT, A.; KUSKY, T. M.; LI, JIANGHAI; FRYER, B. J.; KERRICH, R.; PATRICK, K., 2005	38.5	113	IGNEOUS	VOLCANIC	BASALT	2525	25	49.34	0.95	14.64		14.33			0.21	7.77	9.77	0.08	2.75	0.16	2.56	2.84	7.67	1.17	5.95	1.93	0.72	2.64	0.45	3.17	0.68	2.01	0.29	1.92	0.27		264	211	38	97	68	52	25		41	0.12	0.036
CR01	GEOROC	CORREA DA COSTA, P. C.; GIRARDI, V. A. V., 2005	-14.5	-49.9	IGNEOUS	VOLCANIC	ANDESITE	2490	0	53.55	0.88	14.15	1.37	11.48	10.11	10.33	0.17	6.73	9.88	2.41	0.91	0.14	0.2	17	33		18											37	228	176		79			107		269
CR02	GEOROC	CORREA DA COSTA, P. C.; GIRARDI, V. A. V., 2005	-14.5	-49.9	IGNEOUS	VOLCANIC	BASALT	2490	0	49.9	1.16	12.45	1.56	13.1	11.54	11.79	0.18	9.52	11.66	1.7	0.24	0.11	0.91		14		9											49	336	244		148			77		57
CR03	GEOROC	CORREA DA COSTA, P. C.; GIRARDI, V. A. V., 2005	-14.5	-49.9	IGNEOUS	VOLCANIC	BASALT	2490	0	49.2	1.08	12.44	1.57	13.21	11.64	11.89	0.19	10.01	11.68	1.59	0.25	0.11	0.99	3	10		9											45	320	359		202			74		44
CR04	GEOROC	CORREA DA COSTA, P. C.; GIRARDI, V. A. V., 2005	-14.5	-49.9	IGNEOUS	VOLCANIC	BASALT	2490	0	49.4	1.39	11.96	1.73	14.53	12.8	13.07	0.19	9.11	11.51	1.77	0.23	0.15	1.23	4.88	11.5	1.85	9.43	2.96	1.13	3.94	0.72	4.75	0.98	2.97	0.45	2.81	0.43	50	292	170	48	148	97	88	79	19	114	0.3	0.33
CR05	GEOROC	CORREA DA COSTA, P. C.; GIRARDI, V. A. V., 2005	-14.5	-49.9	IGNEOUS	VOLCANIC	ANDESITE	2490	0	52.3	0.91	14.46	1.37	11.51	10.14	10.36	0.17	7.87	9.91	2.31	0.89	0.14	0.15	15	35		15											34	212	245		137			112		261
CR06	GEOROC	CORREA DA COSTA, P. C.; GIRARDI, V. A. V., 2005	-14.5	-49.9	IGNEOUS	VOLCANIC	BASALT	2490	0	49.7	1.44	12.46	1.73	14.53	12.8	13.07	0.2	8.6	11.09	1.97	0.24	0.15	0.7	5.38	12.4	1.99	9.73	3.06	1.17	3.99	0.77	4.92	1.03	3.12	0.47	2.96	0.46	49	294	149	47	131	118	90	84	19	53	0.28	0.37
CR07	GEOROC	CORREA DA COSTA, P. C.; GIRARDI, V. A. V., 2005	-14.5	-49.9	IGNEOUS	VOLCANIC	BASALT	2490	0	50.4	1.18	12.19	1.59	13.38	11.79	12.04	0.18	9.38	11.45	1.57	0.25	0.12	0.75		13		9											46	331	251		187			77		103
CR08	GEOROC	CORREA DA COSTA, P. C.; GIRARDI, V. A. V., 2005	-14.5	-49.9	IGNEOUS	VOLCANIC	BASALT	2490	0	50	1.32	12.51	1.61	13.57	11.96	12.21	0.18	9	11.53	1.72	0.21	0.12	0.97		13		11											50	359	208		137			89		53
CR09	GEOROC	CORREA DA COSTA, P. C.; GIRARDI, V. A. V., 2005	-14.5	-49.9	IGNEOUS	VOLCANIC	BASALT	2490	0	50	1.3	12	1.69	14.24	12.55	12.81	0.19	9.26	11.29	1.46	0.33	0.14	0.65		12		10											53	372	185		129			93		66
CR10	GEOROC	CORREA DA COSTA, P. C.; GIRARDI, V. A. V., 2005	-14.5	-49.9	IGNEOUS	VOLCANIC	BASALT	2490	0	49.9	1.19	12.12	1.65	13.9	12.25	12.51	0.19	9.2	11.45	1.77	0.32	0.1	0.88	3.36	7.9	1.34	6.53	2.24	0.92	3.02	0.6	3.91	0.83	2.58	0.39	2.53	0.38	52	283	195	43	94	97	54	56	18	50	0.17	0.27
CR100	GEOROC	CORREA DA COSTA, P. C.; GIRARDI, V. A. V., 2005	-14.5	-49.9	IGNEOUS	VOLCANIC	BASALT	2490	0	50	1.1	12.94	1.56	13.15	11.59	11.83	0.18	9.15	11.43	1.84	0.2	0.14	0.62	3	15		10											47	331	220		131			77		58
CR101	GEOROC	CORREA DA COSTA, P. C.; GIRARDI, V. A. V., 2005	-14.5	-49.9	IGNEOUS	VOLCANIC	ANDESITE	2490	0	54	0.95	13.95	1.4	11.75	10.35	10.57	0.17	6.71	9.74	2.33	1.01	0.17	0.39	19	33		19											34	226	145		72			112		327
CR102	GEOROC	CORREA DA COSTA, P. C.; GIRARDI, V. A. V., 2005	-14.5	-49.9	IGNEOUS	VOLCANIC	ANDESITE	2490	0	54.3	0.9	14.46	1.35	11.34	9.99	10.2	0.17	6.43	9.56	2.41	1	0.17	0.13	15.3	25.6	3.59	14.7	3.21	1.15	3.83	0.61	3.84	0.79	2.3	0.36	2.37	0.33	34	194	172	43	87	67	111	91	17	273	0.37	0.86
CR103	GEOROC	CORREA DA COSTA, P. C.; GIRARDI, V. A. V., 2005	-14.5	-49.9	IGNEOUS	VOLCANIC	BASALT	2490	0	49.8	1.39	13.54	1.6	13.46	11.86	12.11	0.18	8.45	11.21	1.91	0.19	0.16	0.17	4.52	10.9	1.78	8.91	2.99	1.15	3.89	0.76	4.87	1.03	3.11	0.48	3.06	0.47	47	299	149	50	157	113	90	79	20	47	0.25	0.25
CR104	GEOROC	CORREA DA COSTA, P. C.; GIRARDI, V. A. V., 2005	-14.5	-49.9	IGNEOUS	VOLCANIC	BASALT	2490	0	50	1.35	13.88	1.55	13.03	11.48	11.72	0.18	8.29	11.11	2.07	0.18	0.18	0.01	4.6	10.9	1.75	9.04	2.81	1.16	3.91	0.76	4.71	0.99	3	0.46	3.04	0.42	43	299	173	49	149	93	86	77	20	48	0.26	0.23
CR105	GEOROC	CORREA DA COSTA, P. C.; GIRARDI, V. A. V., 2005	-14.5	-49.9	IGNEOUS	VOLCANIC	BASALT	2490	0	50.6	0.98	12.08	1.63	13.71	12.08	12.34	0.19	9.33	11.25	1.58	0.3	0.14	0.84	4.05	9.4	1.5	7.81	2.36	0.97	3.27	0.61	4	0.85	2.54	0.39	2.53	0.37	45	264	233	62	326	121	60	62	17	40	0.22	0.23
CR106	GEOROC	CORREA DA COSTA, P. C.; GIRARDI, V. A. V., 2005	-14.5	-49.9	IGNEOUS	VOLCANIC	BASALT	2490	0	51.1	1.01	12.59	1.58	13.3	11.72	11.97	0.18	8.89	11.14	1.7	0.21	0.14	0.61	4	12		10											42	311	228		175			73		54
CR107	GEOROC	CORREA DA COSTA, P. C.; GIRARDI, V. A. V., 2005	-14.5	-49.9	IGNEOUS	VOLCANIC	BASALT	2490	0	50	1.17	14.36	1.51	12.7	11.19	11.43	0.18	8.24	11.17	2.12	0.15	0.15	0.1	3.75	9	1.46	7.4	2.38	1.03	3.33	0.63	4.04	0.86	2.58	0.39	2.53	0.37	44	266	157	53	202	104	77	62	18	39	0.17	0.17
CR108	GEOROC	CORREA DA COSTA, P. C.; GIRARDI, V. A. V., 2005	-14.5	-49.9	IGNEOUS	VOLCANIC	BASALT	2490	0	50.1	1.31	12.42	1.65	13.84	12.19	12.45	0.19	8.98	11.15	1.82	0.26	0.15	0.66	5.04	11.7	1.82	9.07	2.94	1.13	3.76	0.71	4.55	0.95	2.85	0.42	2.72	0.41	47	276	167	47	147	87	77	76	18	64	0.24	0.27
CR109	GEOROC	CORREA DA COSTA, P. C.; GIRARDI, V. A. V., 2005	-14.5	-49.9	IGNEOUS	VOLCANIC	BASALT	2490	0	50.4	3.79	12.76	1.73	14.55	12.82	13.09	0.18	6.01	7.76	2.5	1.83	0.61	1.98	37.1	76.6	10.5	45.5	9.74	3.35	9.68	1.4	7.52	1.39	3.77	0.49	3.11	0.37	23	361	176	37	57	147	118	256	26	573	1.85	1.01
CR11	GEOROC	CORREA DA COSTA, P. C.; GIRARDI, V. A. V., 2005	-14.5	-49.9	IGNEOUS	VOLCANIC	BASALT	2490	0	52.3	0.25	13.43	1.26	10.61	9.35	9.55	0.16	11.83	9.2	0.82	0.04	0.03	0.89															50	234	518		238			10		41
CR110	GEOROC	CORREA DA COSTA, P. C.; GIRARDI, V. A. V., 2005	-14.5	-49.9	IGNEOUS	VOLCANIC	BASALT	2490	0	45.1	2.4	15.49	1.78	15	13.22	13.5	0.18	8.61	10.31	2.48	0.61	0.48	0.13	19.7	41.9	5.93	27.5	6.38	2.26	7.22	1.11	6.45	1.25	3.56	0.5	3.24	0.47	29	152	141	54	88	147	40	166	22	408	0.97	0.43
CR12	GEOROC	CORREA DA COSTA, P. C.; GIRARDI, V. A. V., 2005	-14.5	-49.9	IGNEOUS	VOLCANIC	BASALT	2490	0	49.4	1.1	12.17	1.61	13.56	11.95	12.2	0.19	9.78	11.74	1.66	0.24	0.11	0.93		12		8											49	333	313		187			78		65
GO01	GEOROC	CORREA DA COSTA, P. C.; GIRARDI, V. A. V., 2005	-14.5	-49.9	IGNEOUS	VOLCANIC	BASALT	2490	0	49.5	2.23	9.91	2.42	20.31	17.89	18.28	0.22	5.68	9.72	2.42	0.84	0.3	0.91	10	33		21											40	316	102		81			202		179
GO03	GEOROC	CORREA DA COSTA, P. C.; GIRARDI, V. A. V., 2005	-14.5	-49.9	IGNEOUS	VOLCANIC	BASALT	2490	0	49.5	2.06	10.45	2.25	18.92	16.67	17.02	0.21	6.21	10.23	2.59	0.71	0.22	0.77	7	28		16											43	327	106		65			159		148
GO04	GEOROC	CORREA DA COSTA, P. C.; GIRARDI, V. A. V., 2005	-14.5	-49.9	IGNEOUS	VOLCANIC	BASALT	2490	0	49.2	2.13	10.19	2.29	19.29	17	17.36	0.21	6.36	10.5	2.19	0.73	0.27	0.75	10.7	22.7	3.29	15.6	4.66	1.72	6.06	1.12	7.12	1.45	4.38	0.66	4.03	0.62	44	259	100	49	54	103	230	197	21	152	2.74	0.91
GO05	GEOROC	CORREA DA COSTA, P. C.; GIRARDI, V. A. V., 2005	-14.5	-49.9	IGNEOUS	VOLCANIC	BASALT	2490	0	49.7	1.63	14.01	1.78	14.96	13.18	13.46	0.18	6.78	9.21	2.69	1.2	0.26	0.88	18	46		22											35	289	77		143			182		496
GO06	GEOROC	CORREA DA COSTA, P. C.; GIRARDI, V. A. V., 2005	-14.5	-49.9	IGNEOUS	VOLCANIC	BASALT	2490	0	49.3	1.29	13.81	1.6	13.47	11.87	12.12	0.18	8.65	11.06	1.93	0.32	0.13	0.21		14		11											48	347	223		151			83		51
GO07	GEOROC	CORREA DA COSTA, P. C.; GIRARDI, V. A. V., 2005	-14.5	-49.9	IGNEOUS	VOLCANIC	BASALT	2490	0	49.5	0.76	10.96	1.48	12.43	10.95	11.18	0.18	13.58	8.66	1.25	0.73	0.07	1.08	3.86	8.22		5.26	1.45	0.56	1.86		2.67		1.34		1.2	0.18	37	280	1100	63	406	77	100	45	13	59
GO08	GEOROC	CORREA DA COSTA, P. C.; GIRARDI, V. A. V., 2005	-14.5	-49.9	IGNEOUS	VOLCANIC	BASALT	2490	0	50.7	2.15	10.1	2.35	19.72	17.37	17.74	0.21	5.61	9.6	2.03	0.79	0.3	0.69	10	34		22											43	329	106		75			189		146
GO100	GEOROC	CORREA DA COSTA, P. C.; GIRARDI, V. A. V., 2005	-14.5	-49.9	IGNEOUS	VOLCANIC	BASALT	2490	0	49.4	1.71	13.77	1.79	15.09	13.3	13.58	0.18	7.24	9.06	2.69	1.09	0.32	0.6	19.6	37.8	4.99	21	4.8	1.68	5.5	0.93	5.74	1.16	3.41	0.51	3.26	0.45	34	238	69	50	134	117	179	153	20	424	0.57	0.53
GO101	GEOROC	CORREA DA COSTA, P. C.; GIRARDI, V. A. V., 2005	-14.5	-49.9	IGNEOUS	VOLCANIC	BASALT	2490	0	52.5	1.87	10.49	2.14	17.98	15.84	16.18	0.19	4.97	8.6	2.93	1.18	0.43	0.38	26	63		32											31	256	48		55			312		305
GO104	GEOROC	CORREA DA COSTA, P. C.; GIRARDI, V. A. V., 2005	-14.5	-49.9	IGNEOUS	VOLCANIC	BASALT	2490	0	50.1	0.81	16.07	1.19	9.97	8.78	8.97	0.16	8.82	11.91	1.84	0.14	0.08	0.19	2.49	5.93	0.95	4.84	1.53	0.73	2.09	0.4	2.59	0.54	1.62	0.25	1.59	0.24	42	215	439	42	323	55	120	42	14	47	0.12	0.49
[truncated: 42,342 more rows]
[truncated: 18 more columns]
